# Supplementary material for: RNA Sequencing of the NCI-60: Integration into CellMiner and CellMiner CDB
Source: Oxford University Press journal article supplement (doi:10.1158/0008-5472.can-18-2047), 2019-05-21
Supplement: 00085472can182047-sup-204600_3_supp_5512706_pr95mg.xlsx [file 00085472can182047-sup-204600_3_supp_5512706_pr95mg.xlsx]

## Sheet: isoforms
Footnotes:
a "Cell lines" are described at the Cell Line Metadata tab at http://discover.nci.nih.gov/cellminer/. BR is breast; CNS is central nervous system; CO is colon; LE is leukemia; ME is melanoma;, LC is
lung cancer; OV is ovarian; PR is prostrate; RE is renal.
b Gene name as defined by the UCSC Table Browser at https://genome.ucsc.edu/cgi-bin/hgTables. -AS placed at the end of a genes name is antisense strand (as defined by NCBI)..
c Transcript reference sequence as defined by NCBI at http://www.ncbi.nlm.nih.gov/nucleotide. A designation of "-dup" at the end of a reference sequence indicates a duplicate form within that NCBI
designation, with either an altered start or stop site (or both).
d The Mean abundance ratio for each gene is calculated in several steps. First, each cell lines isoforms expression levels are determined using Cufflinks for a gene. The abundance ratio is then
determined for each isoform for each cell line as the expression level of that isoform divided by the total of all isoforms expressions for that gene and cell line. The average of each isoform's
abundance ratios across the cell lines is the mean abundance ratio for that isoform for that gene.
e Start, stop and chromosome number are as defined by by University California Southern California (UCSC) Table Browser at https://genome.ucsc.edu/cgi-bin/hgTables.
f Protein reference sequence are defined by NCBI at http://www.ncbi.nlm.nih.gov/protein.
g Number of amino acids in the protein reference sequence.
		Supplemental Table 2: Transcript levels for 46,834 isoforms (fragments per kilobase per million reads, FPKM)
			Transcript information																		Cell lines a
			Mean abundance					Amino		Chromo-		BR:	BR:	BR:	BR:	BR:	CNS:	CNS:	CNS:	CNS:	CNS:	CNS:	CO:	CO:	CO:	CO:	CO:	CO:	CO:	LE:	LE:	LE:	LE:	LE:	LE:	ME:	ME:	ME:	ME:	ME:	ME:	ME:	ME:	ME:	ME:	LC:	LC:	LC:	LC:
Gene names b		Transcript c	ratio d	Start e	Stop e		Protein f	acids g		some e		MCF7	MDA_MB_231	HS578T	BT_549	T47D	SF_268	SF_295	SF_539	SNB_19	SNB_75	U251	COLO205	HCC_2998	HCT_116	HCT_15	HT29	KM12	SW_620	CCRF_CEM	HL_60	K_562	MOLT_4	RPMI_8226	SR	LOXIMVI	MALME_3M	M14	SK_MEL_2	SK_MEL_28	SK_MEL_5	UACC_257	UACC_62	MDA_MB_435	MDA_N	A549	EKVX	HOP_62	HOP_92
A1BG		NM_130786	1	58858171	58864865		NP_570602.2	495		chr19		1.91821	0.492422	3.36955	6.00088	3.72562	2.74292	2.12943	1.8069	1.78819	0.513985	0.556983	0.186463	0.189648	0.237336	0.310753	0.435576	0.370787	0.0894288	9.6705	0.499944	0.335695	6.43142	1.24869	0.494299	0.137555	1.1856	1.6079	0.854958	1.27958	0.979409	1.10786	2.02705	0.757365	1.03923	2.06284	0.535028	0.499378	1.19973
A1BG-AS1		NR_015380	1	58863335	58866549		na	na		chr19		2.89241	0.11608	1.16519	1.91839	1.64736	0.168513	2.08635	1.73184	0.209847	0.188132	0.391261	0	0	0.0958713	0.0994736	0	0	0	3.32765	0.140009	0.219267	0.899994	0.882732	0.552065	0	2.21884	1.92596	2.26772	2.44795	0.250008	0.52892	3.36023	1.40182	0.383729	0.335535	0.532424	0.717618	1.74735
A1CF		NM_138933	0.214114	52559168	52645435		NP_620311.1	594		chr10		0	0	0	0	0	0.00966754	0.0143993	0	0.0432053	0	0	0.311387	0	0.00427423	0	0	0	0	0	0	0	0	0.0898899	0	0	0	0	0	0	0.0377343	0	0	0	0	0.122924	0	0	0
A1CF		NM_014576	0.538271	52559168	52645435		NP_055391.2	586		chr10		0.0282014	0.0146448	0	0	0.00900618	0	0	0.0116242	0	0	0.0274877	1.2557	0.0543568	0	0	0.0134413	0	0.305781	0.0149457	0.0127291	0	0.0330867	0	0	0	0.00743274	0	0.0161518	0	0	0.008576	0	0	0.089069	0	0.0182548	0.0107406	0
A1CF		NM_138932	0.112985	52559168	52645435		NP_620310.1	594		chr10		0	0	0	0	0	0	0	0	0	0	0	0.581968	0.241299	0	0	0	0	0	0	0	0	0	0	0	0.0306368	0	0	0	0	0	0	0	0	0	0.0561663	0	0	0
A1CF		NM_001198820	0.0194069	52559168	52645435		NP_001185749.1	594		chr10		0	0	0	0	0	0	0	0	0	0	0	0	0	0.0443665	0	0	0	0	0	0	0	0	0	0	0	0	0	0	0	0	0	0	0	0	0	0	0	0
A1CF		NM_001198818	0.0638298	52559168	52645435		NP_001185747.1	586		chr10		0	0	0	0	0	0	0	0	0	0.00699078	0	0	0	0	0	0	0	0	0	0	0	0	0	0	0	0	0.0516398	0	0	0	0	0	0	0	0	0	0	0
A1CF		NM_001198819	0.0513924	52559168	52645435		NP_001185748.1	602		chr10		0	0	0.0402786	0	0	0	0	0	0	0	0	0	0	0	0	0	0.033227	0	0	0	0	0	0	0	0	0	0	0	0	0	0	0	0	0	0	0	0	0
A2M		NM_000014	1	9220303	9268558		NP_000005.2	1474		chr12		0.0340493	0.0236381	0.0380135	0	0.0142797	0.0468271	0.0206563	0.233577	0.39835	124.649	0.0229734	0.0174529	0.0290071	0.036172	0.0261426	0.0161849	0.0275596	0.0455825	0.0672064	0.0335684	0	0.196077	0.0757102	0	0	34.3912	1.56795	3.09147	14.0577	8.98154	5.08592	7.22932	0.0750869	0.244329	0	0.632179	0.0414645	0.0249613
A2M-AS1		NR_026971	1	9217772	9220651		na	na		chr12		0.206964	0	0	0	0.0596893	0	0	0.344345	0.111546	5.73922	0.046481	0.0637642	0.0677653	0.318149	0.150023	0	0.0475941	0.102822	0.0242993	0	0	0	0.0913144	0	0	1.40553	0.594779	0.43742	0.652996	0.101668	0.165797	0.235139	0	0.26902	0.100652	0.719052	0	0
A2ML1		NM_144670	0.852823	8975149	9029381		NP_653271.2	1454		chr12		0	0	0	0	0	0	0	0	0.0547114	0.0120705	0	0.0140977	0	0.0106398	0	0	2.40277	0.0317281	0	0	0	0.0370986	0.0460198	0	0	0	0.030397	0	0	0.0287145	0.0248453	0.0146021	0.0224915	0.0621973	0	0	0	0
A2ML1		NM_001282424	0.147177	8997599	9029381		NP_001269353.1	963		chr12		0	0	0.0758586	0	0	0	0	0	0	0	0	0	0	0.0109541	0	0	1.61745	0	0	0	0	0	0	0	0	0	0	0.0115748	0	0.0160492	0	0	0	0	0	0	0	0
A2MP1		NR_040112	1	9381128	9386803		na	na		chr12		0	0	0	0	0	0	0	0	0	0	0	0	0	0	0	0	0	0	0	0	0	0.0401787	0	0	0	0	0.0394701	0	0	0.0292464	0	0	0	0	0	0	0	0
A3GALT2		NM_001080438	1	33772366	33786699		NP_001073907.1	340		chr1		0	0.0668871	0	0	0.152862	0.194719	0.0727188	0.0841137	0.105912	0.123438	0	0.137381	0	0.0445783	0	0.101795	0.0850759	0.19515	0	0.160877	0	0.589949	0.330636	0	0	0	0.177112	0.0614579	0	0.195763	0.143389	0	0	0.215533	0	0.119601	0	0
A4GALT		NM_017436	1	43088126	43116876		NP_059132.1	353		chr22		2.45916	0.215325	0.354048	5.52491	0.711732	0.332347	0.407397	0.79467	4.06834	4.6619	1.96892	0.11745	4.70423	1.09904	0.320768	2.59733	2.19609	0.175778	0.0626094	0.156162	0.103374	0.325017	0.492137	0.431435	0	2.18758	0.134262	4.57659	0.880162	0.142406	0.0662271	0.0690766	0	0.168165	1.54054	1.90342	1.65618	2.62571
A4GNT		NM_016161	1	137842559	137851229		NP_057245.1	340		chr3		0	0	0.296847	0	0	0.0918589	0	0	0.233059	0.0670979	0.0326843	0	0	0.0256872	0	0	0	0	0	0	0	0.0433927	0.246589	0	0	0	0.0490492	0	0	0.0300304	0	0	0	0.348997	0.120481	0	0	0
AA06		NR_037584	1	31856805	31860779		na	na		chr17		0	0	0	0	0	0	0	0	0	0	0	0	0	0	0	0	0	0	0	0	0	0	0	0	0	0	0	0	0	0	0	0	0	0	0	0	0	0
AAAS		NM_001173466	0.216116	53701239	53715412		NP_001166937.1	513		chr12		0	0	1.16778	2.03202	2.92202	0	9.2554	2.09012	0.729472	0.490172	1.04942	0.0709915	0	7.79148	0.134833	0	1.05671	0	2.94009	3.56777	1.18795	2.97027	4.50145	0.271638	0.613974	0.413075	0.665755	0.199352	0	2.67331	2.14611	1.49663	0.901228	1.23809	3.68393	0.598337	0.435658	2.08915
AAAS		NM_015665	0.783884	53701239	53715412		NP_056480.1	546		chr12		8.43774	0.441295	1.14699	2.23349	8.36944	5.47996	3.66534	3.55214	2.36483	5.30587	7.86062	5.26731	5.48369	5.73	5.23617	7.73302	5.77303	0.164478	34.293	2.98269	14.0314	3.74973	0.332649	7.39661	9.91701	5.38603	8.75647	6.89205	4.75213	3.1744	10.1518	13.7656	10.7579	1.28569	6.01405	7.7465	7.08399	7.59947
AACS		NM_023928	1	125549924	125627871		NP_076417.2	672		chr12		2.05012	0.442996	1.60127	0.780848	3.90088	1.06571	5.7491	3.98712	1.91005	2.22726	5.56901	9.67206	3.30477	0.799415	4.70499	4.83615	6.34727	0.728618	7.29624	0.45738	0.857238	1.07948	1.807	1.78867	1.73244	5.2998	5.875	5.58509	2.25157	2.81115	1.79018	4.88901	4.06247	1.13796	1.30234	4.4927	4.17843	2.89333
AACSP1		NR_024035	1	178191863	178203277		na	na		chr5		0.0841511	0	0.102769	0	0.0513974	0	0.560551	0.0563026	0.0761098	0	0.245077	0.0548136	0	1.27817	0	0	0.0452874	0.0688922	0.110769	0	0.108257	0.0607594	0.167234	0.105832	0	0	0.297845	1.69258	0.0439015	0.0574994	0.0748598	0.817123	0.850816	0.298659	0	0.0589621	0	0
AADAC		NM_001086	1	151531860	151546276		NP_001077.2	399		chr3		0	0	0.0830156	0	0	0	0.577355	0	0	0	0	0	0	1.06425	0	0.0982336	0	0	0	0	0	0	0.148064	0	0	0	0.121018	0	0	0.114062	0	0	0	0.163127	0.984018	0.785129	0.0928358	0
AADACL2		NM_207365	1	151451703	151475556		NP_997248.2	401		chr3		0	0	0	0	0	0	0	0	0	0	0	0	0	0	0	0	0	0	0	0	0	0.0206719	0.166776	0	0	0	0.0416207	0	0	0.023468	0	0	0	0.175775	0	0	0	0
AADACL2-AS1		NR_110203	0.888889	151468966	151645963		na	na		chr3		0	0	0	0	0	0	0	0	0	0	0	0	0	0	0	0	0	0	0	0	0	0.0534011	0.284008	0	0	0	0	0	0	0.0827301	0	0	0	0	0	0	0	0
AADACL2-AS1		NR_110202	0.111111	151468966	151645963		na	na		chr3		0	0	0	0	0	0	0	0	0	0	0	0	0	0	0	0	0	0	0	0	0	0	0	0	0	0	0	0	0	0	0	0	0	0	0	0	0	0
AADACL3		NR_111984	0.604812	12776117	12788726		na	na		chr1		0	0	0.0673917	0	0.0102301	0	0	0.0124228	0	0.0115817	0	0.0214326	0	0.00758966	0	0	0	0.0199743	0	0	0	0.0221046	0.300894	0	0	0	0.0236605	0	0	0	0	0	0	0.27032	0	0	0	0
AADACL3		NM_001103170	0.395188	12776117	12788726		NP_001096640.2	407		chr1		0	0	0.0411981	0	0	0	0	0	0.105883	0	0	0	0	0	0	0	0	0	0	0.0180952	0	0	0	0	0	0	0.010868	0	0	0.0253121	0	0	0	0	0	0	0	0
AADACL4		NM_001013630	1	12704565	12727097		NP_001013652.1	407		chr1		0	0	0.0908567	0	0	0	0	0	0.112448	0	0	0	0	0.0781005	0	0	0	0	0	0	0	0.0525239	0.225774	0	0	0	0.045361	0	0	0.0439059	0	0	0	0.185447	0	0	0	0
AADACP1		NR_026915	1	151488243	151502682		na	na		chr3		0	0	0.109547	0	0	0	0.856651	0	0	0	0	0	0.145031	1.31214	0	0.149532	0	0	0	0	0	0	0.260954	0	0	0	0.0288498	0.0899643	0	0.0700308	0	0	0	0.181033	1.55105	0.935868	0.0731281	0
AADAT		NM_016228	0.760515	170981372	171011183		NP_057312.1	425		chr4		1.4227	1.11644	0.347873	0	0.0272197	0.860968	0	0.45969	0.960779	0.817215	1.61709	0.371168	3.5777	3.13482	0.960989	0.066711	1.07269	0.355349	0.408804	0.123713	0	0.529027	0	0	0.70076	0.886909	1.60091	1.20467	0.4909	1.15839	0.919315	0.463136	1.92899	1.05795	0.802401	2.13176	0.54426	0.336467
AADAT		NM_001286682	0.00778634	170981372	171011372		NP_001273611.1	429		chr4		0	0	0	0	0	0	0	0	0	0.0300609	0	0	0	0	0	0	0	0	0	0	0	0	0	0	0	0	0	0.0543712	0	0	0	0	0.0830938	0	0	0	0.066421	0
AADAT		NM_182662	0.182607	170981372	171011372		NP_872603.1	425		chr4		0.167656	1.27929	0	0	0	0	0	0	0	0	1.28851	0	0.48346	2.17077	0.125023	0	0.178973	7.66974	2.49007	0.0591342	0	0.043842	0	0	0.355609	0.124742	0.0685932	0	0	0.5258	0.165366	0	0.539768	0	0	0.373178	0	0
AADAT		NM_001286683	0.0490915	170981372	171011538		NP_001273612.1	425		chr4		0	0	0	0	0	0	0.292977	0.0527075	0	0	0.0387088	0	0	0.0449686	0	0	0.108494	0	0	0	0	0.0905175	0	0	0	0	0	0.0713856	0	0	0	0.332926	0.336764	0	0	0	0	0
AAED1		NM_153698	1	99403532	99417599		NP_714542.1	226		chr9		1.34999	12.0872	1.43155	3.05064	1.76776	3.2134	5.00407	4.18466	1.75898	4.65132	4.41588	1.59199	2.74788	7.16698	1.1819	1.18655	1.76809	4.37144	0.510813	2.89793	2.97246	0.259781	0.796081	0.238254	5.55327	3.02022	2.83442	1.13729	1.62222	0.937399	1.97794	3.18937	3.53834	1.92706	1.73739	2.42741	2.72858	3.29071
AAGAB		NM_001271886	0.116776	67493012	67547074		NP_001258815.1	206		chr15		0.926853	0	0.315219	0.286216	0.878536	1.01693	0.269959	0.725084	0.569415	0.175381	0.694558	0.386056	0.297658	0.54147	0.221218	0.815255	0.407307	0	0.430036	0.309218	0.748055	0.24001	0.219564	1.07747	0.47371	0.0584006	0.134485	0.383633	0.108345	0.864346	0.542184	0.236135	0.677494	0.315024	0.411875	1.09947	0.27514	0.38496
AAGAB		NM_024666	0.653414	67493012	67547074		NP_078942.3	315		chr15		8.23459	4.49714	1.27214	0.319926	5.00602	2.14454	3.97394	3.48983	0.758693	1.71284	7.25441	3.77548	4.47586	3.43697	2.66773	6.44829	5.63338	4.21184	4.19051	2.64668	3.74545	3.35882	0.207472	1.88301	4.26724	4.27568	0.647746	2.50964	1.47325	0.4651	3.35794	1.86155	3.25675	0.0964717	4.45404	7.24769	1.54879	0.66926
AAGAB		NM_001271885	0.22981	67493012	67547536		NP_001258814.1	206		chr15		0.242013	0	0	1.32631	0.443557	0	2.59539	1.05267	0.849239	0.667215	1.14726	1.17197	0.367248	9.48542	1.73033	0	0.266378	1.26495	11.3914	0.585794	0	0	2.66306	0	0	1.08127	1.47863	0.714214	1.07809	0.176547	1.60659	2.13995	0	0.991563	0	0.317914	1.70906	1.47952
AAK1		NM_014911	1	69685126	69870977		NP_055726.3	961		chr2		0.715441	2.29842	1.56415	0.944038	0.941124	1.44149	4.86051	3.12017	1.28417	2.77581	2.96632	0.464636	0.730592	1.87349	0.837492	1.12947	0.974177	0.390467	2.70142	0.43167	0.458823	1.6864	0.365226	0.191748	1.32036	2.70102	1.63041	2.25312	3.1139	1.73879	2.26573	2.73375	3.09907	0.969688	1.36234	3.27206	3.53882	3.27425
AAMDC		NM_024684	1	77532207	77583398		NP_078960.1	122		chr11		12.0279	29.5894	6.82319	3.61838	16.1243	10.6375	14.1882	5.50331	3.59125	10.6934	4.99308	4.37991	3.70575	7.9186	2.88253	4.58035	9.14127	6.52056	18.6683	10.9	3.34818	9.33556	3.6994	2.73049	12.1217	3.77541	8.42692	1.50711	2.8502	1.19956	7.934	5.31735	4.53139	3.1622	6.84364	14.5518	5.63021	11.3922
AAMP		NM_001087	0.837013	219128851	219134932		NP_001078.2	434		chr2		18.9694	2.56915	8.48257	8.21157	15.4307	8.50908	23.4199	15.5427	15.4843	7.94724	22.3248	11.1654	13.8673	25.2323	13.5949	19.4539	14.6479	2.19747	49.2549	11.8624	11.8307	7.98617	6.47623	7.73822	15.1232	14.5857	8.79465	23.7763	19.8724	6.167	21.4669	34.309	27.0604	7.05578	7.49757	11.0007	18.7489	19.9748
AAMP		NM_001302545	0.162987	219128851	219134932		NP_001289474.1	435		chr2		7.72171	2.6867	1.67603	0	1.0933	0.173432	0	1.55368	1.62759	4.0919	4.33063	4.04449	1.61094	7.41567	2.36683	3.61879	2.70533	0	5.50401	0	1.91983	5.60329	0	0.348391	2.74841	2.13531	6.06133	1.1449	8.78072	4.78248	4.6237	5.46416	8.52435	3.04316	5.33056	2.30436	1.28264	1.05389
AANAT		NM_001166579	0.252155	74449432	74466199		NP_001160051.1	252		chr17		0.0830405	0	0	0	0.230971	0	0.388841	0.0327697	0.0535949	0	0.0727053	0.0706316	0	0.170423	0	0	0	0	0	0	0	0.0556537	0.27783	0.164903	0	0.060795	0.175437	0.0698136	0.0568321	0.121132	0	0.0939585	0	0.26136	0.115278	0	0.0945928	0
AANAT		NR_110548	0.178862	74463629	74466199		na	na		chr17		0	0	0	0	0	0	0.249832	0	0	0.126602	0	0	0	0	0	0.172818	0	0	0	0.215253	0	0	0	0	0	0.214663	0.412553	0.171301	0	0.528102	0	0	0	0	0	0.127336	0	0.341904
AANAT		NM_001088	0.568984	74463629	74466199		NP_001079.1	207		chr17		0	0.130361	0	0	0	0.388622	0.256634	0.208281	0.224872	0	0.206347	0.130702	0	0.0893954	0.163235	0	0.199654	0.3464	0.118297	0	0	0.364003	0.361395	0.38692	0.159067	0	0.19038	0	0.237406	0	0.461175	0.298938	0.248368	0	0.204842	0	0.307604	0
AAR2		NM_001271874	0.952774	34824338	34844863		NP_001258803.1	384		chr20		6.8212	6.95697	4.50402	9.87633	11.5272	2.25315	9.77165	9.92414	7.83077	8.52244	8.36637	6.57918	5.84716	6.94046	2.85665	8.2688	6.14234	7.09813	27.7529	6.91544	5.27671	9.67441	5.99613	4.38593	7.56187	5.66226	8.00481	6.88614	7.62939	4.99972	7.86627	13.2873	11.937	4.38339	4.35122	7.82908	8.19521	6.86264
AAR2		NM_015511	0.0472256	34824338	34844863		NP_056326.2	384		chr20		0.178965	0	0.220673	0	0.517365	0.59386	0.0397697	0.567309	0.0561038	0.390536	0.337243	0.360931	0.421683	0.113334	0	0.222782	0.316979	0	0.205967	0.0662293	0.690844	0.747327	0.234048	0.17216	0.222122	0.647388	0.101775	0.511061	0.248256	0.0840881	0.462742	0.591498	0.300184	0.335497	0.125054	0.509382	0.18398	0.0702669
AARD		NM_001025357	1	117950463	117956239		NP_001020528.1	155		chr8		0.592411	0	0.228982	5.21663	0.362366	0	0.208604	0	0.094907	0	0	0.316317	0	0.0188422	0	0	0	0.040568	0.427597	0.0939101	0	0.22615	0.208261	0	0	0.0768128	0.393323	0.365035	0.0885992	0.309846	0.153201	0.155323	0	0.192727	0.0801045	1.07419	0	0
AARS		NM_001605	1	70286296	70323412		NP_001596.2	968		chr16		12.7944	3.4879	13.9936	18.6269	13.6841	5.42496	17.6304	18.5527	31.6097	14.9287	20.892	10.4091	14.7993	18.1254	11.1787	8.03171	17.1081	5.56045	20.0702	8.10106	20.8312	8.94973	24.4342	14.4935	9.25883	8.39729	7.16697	17.1639	8.33224	10.5528	12.8222	24.025	7.25974	1.73334	12.3467	10.1712	31.2398	11.9043
AARS2		NM_020745	1	44266462	44281063		NP_065796.1	985		chr6		3.35351	1.42882	1.33461	1.25159	1.57231	0.838881	3.17866	2.57666	1.16193	2.10382	2.363	1.14675	2.93143	1.39238	4.76205	1.96459	1.56575	0.595992	5.05465	2.22576	3.66299	3.31483	0.969969	1.34129	2.52269	4.51845	3.7157	4.3379	4.63236	2.29382	8.75114	8.20082	10.0885	1.81879	0.723762	1.75736	3.98959	2.39976
AARSD1		NM_001261434	1	41102542	41116515		NP_001248363.1	412		chr17		3.1479	3.51773	2.97023	1.98365	8.28103	3.6012	15.6996	3.61037	4.31939	4.59145	6.77384	5.70428	5.37189	9.13732	4.85277	7.05061	2.13978	1.51059	31.701	14.832	5.12776	14.3276	6.83762	8.40074	6.68286	3.89645	4.24864	3.45618	4.09181	2.42903	6.63531	10.7859	3.86589	1.39335	5.69853	9.26449	11.8729	6.62367
AASDH		NM_001286670	0.131349	57204450	57253674		NP_001273599.1	613		chr4		0	0	0.120694	0	0.141937	0.0475697	0.200691	0.061924	0.20259	0.248396	0.0338357	0	0	0	0	0.385066	0.154551	0	1.47233	1.0002	0	0.836568	0	0	0	0.0887345	0	0	0	0.052368	0	0	0	0	0.312509	0.0763333	0	0
AASDH		NM_001286671	0.105008	57204450	57253674		NP_001273600.1	857		chr4		0	0.117073	0.0922634	0	0.103221	0	0	0	0.126746	0.0378476	0.0984262	0.201726	0	0.231374	0.156495	0.168973	0.112898	2.90934	0.0802215	0.383457	0.230728	0.46271	0	0	0.0914178	0	0	0	0	0	0	0	0.0583525	0.185477	0	0.0720013	0.182879	0.0853724
AASDH		NM_001286668	0.0757889	57204450	57253674		NP_001273597.1	998		chr4		0	0.489236	0.0499536	0	0.0965173	0	0.0607677	0	0	0.0657449	0.219655	0	0	0.0259156	0	0.278901	0.125789	1.18285	1.40075	0.034848	0	0.203324	0.169564	0	0.251963	0.0485949	0.0737063	0	0	0	0.0529673	0.107929	0	0	0	0.0533861	0	0
AASDH		NM_001286669	0.207067	57204450	57253674		NP_001273598.1	945		chr4		0.0822773	0.110895	0.100477	0.480065	0	0	0.829507	0.150667	1.66851	0	0	0	0	0.386224	0.280722	0.108894	0.37609	0.561084	0.121191	0	0	0.473281	0	0	0	0	0.237587	0.255414	0.35757	0.194789	0	0	0	0	0	0.214132	0.713953	0
AASDH		NM_181806	0.370403	57204450	57253674		NP_861522.2	1098		chr4		0.876262	1.98235	0	0	0.950136	0.0935039	0.15215	0.10486	0.110991	0.454328	0.439548	0.179991	0.973282	1.5719	0.296938	0.203572	0.168133	0	0.3011	0	0.717597	0	0.17838	0.160161	0.104995	0.816902	0	0.240427	0	0.0876778	0.518654	0.530703	0.401249	0.239336	0	0.214428	0.0633748	0.405887
AASDH		NM_001286672	0.110384	57215125	57253674		NP_001273601.1	841		chr4		0.120407	0.254314	0.135637	0	0.153656	0.161907	0.0278556	0.0651871	0.178614	0.0796797	0.108976	0	0.223482	0.117712	0.0786694	0.0651135	0.0759249	0.223323	0.138426	0	0.151641	0.0561296	0	0.0641506	0	0.0634849	0	0.170171	0	0	0.0900608	0.0585899	0.0883282	0.10999	0	0.137821	0.0591687	0
AASDHPPT		NM_015423	1	105948291	105969419		NP_056238.2	309		chr11		3.1831	23.921	2.17479	3.89619	7.09092	1.96763	5.51035	1.97893	5.72211	4.67256	4.80451	1.57047	5.36969	16.7979	3.67236	5.02146	3.70934	21.511	21.587	4.3501	6.02937	5.38963	6.88035	3.25382	7.49074	3.1898	2.54544	2.34803	2.28442	1.66215	5.74376	8.9419	4.9901	3.78018	2.09076	11.7244	5.30416	2.39269
AASS		NM_005763	1	121713597	121784344		NP_005754.2	926		chr7		0	4.78635	0.346582	0.11275	0.305335	2.38969	1.94509	0.63066	1.78573	1.17726	1.66402	0.0784439	0.561039	0.552437	1.52022	0.0211556	0.529478	0.209358	1.382	0.0346242	0	1.18397	0.220146	0.072238	0.833593	1.69596	1.12805	1.6476	1.14151	0.775194	2.20717	1.68415	1.80474	1.00311	0.0192657	0.318113	2.04666	0.123264
AATBC		NR_026961	1	45225638	45232448		na	na		chr21		0.32842	0.0507145	0.205301	0.239118	0.342647	0.179635	0.166348	0.168743	0.152478	0.189233	0.205151	0.124836	0.504118	0.329949	0.283573	0.0830763	0.150244	0.11476	0.16693	0.118354	0.954021	0.302821	0.480097	0.452386	0.129191	0.547787	0.299157	0.558544	0.231887	0.228189	0.647152	0.167031	0.578451	0.262591	0.212836	0.200559	0.273566	0.411271
AATF		NM_012138	1	35306174	35414171		NP_036270.1	560		chr17		5.67458	6.52228	4.21113	5.58767	10.1839	5.67986	25.0723	7.6695	4.63295	8.89307	12.5553	10.6588	9.6755	14.7352	9.18006	15.7076	8.04527	1.13996	38.3664	6.88279	11.4617	14.8329	4.6421	6.65158	20.6448	10.6666	8.51374	15.3675	10.9324	6.06102	15.4837	24.0426	13.0262	3.65859	14.2711	14.8577	23.6137	11.8209
AATK		NM_004920	0.546835	79091095	79105748		NP_004911.2	1271		chr17		0.283424	0	0	0	0.250117	0.112941	0.16797	0.325571	0.234093	13.4557	0.0433793	0	2.91164	0.13806	0.274395	1.99132	0.0587569	0.208377	0.0478405	0	0	0.236013	0.315008	0.116067	0.0547425	3.54788	0.165794	0.857209	0.0574042	0.68616	1.55636	0.450374	0.0721899	0.170181	0.252539	0.0509815	0.102497	0.137795
AATK		NM_001080395	0.453165	79091095	79139872		NP_001073864.2	1374		chr17		0	0.0508703	0.160706	0.190364	0.0519248	0.0389299	0.0169736	0.0672212	0.0356622	0.293189	0.0616017	0.0782582	0	0.275863	0.127723	0.142746	0.150407	0.043178	0	0.183625	0.0631093	0.29305	0.197244	0	0.0304974	0.221424	0.316767	0.0272904	0.0814297	0.388063	0	0	0	0.13996	0	0.402974	0.037096	0
AATK-AS1		NR_027255	1	79139306	79156964		na	na		chr17		0	0.0538721	0.11291	0	0.0765638	0.112911	0.0378982	0.0366203	0.130403	0.0662136	0.0460314	0.0614427	0	0.0748241	0	0.12865	0.0813758	0.113956	0	0.0654422	0	0.161473	0.30437	0	0	0.0461798	0.186887	0.0365413	0.0568071	0.103407	0.0758695	0	0	0.13688	0	0	0.112116	0
ABALON		NR_131907	1	30309309	30311212		na	na		chr20		0.762322	0.166911	0.167502	1.02189	1.12777	1.31578	0.26713	0.717516	0.308246	0.514475	0.776378	0.845843	0.785271	6.03795	0.887403	2.93587	1.62148	0	0.437879	0.172873	2.42033	1.35977	0.306698	1.47009	1.29038	0.440343	0.314436	0.588035	0.216977	0.235426	0.705675	0.422409	0.736018	0.400344	2.48543	3.67934	1.61792	1.4804
ABAT		NM_020686	0.690777	8768443	8878432		NP_065737.2	500		chr16		2.72545	0.036111	0	0	3.83872	0.0378222	0.0420949	0.0175156	1.09217	0.18352	0.0492161	0.1071	0.343301	0.579042	0.256072	0.0345694	0.14259	0.256939	1.84103	0.107442	0	0.664079	0	0.0556453	0	0.129854	0.0559241	0.723752	0.337227	0.0264617	0	0.210154	0.0872446	0	0.0416573	0.132385	0.0484224	0
ABAT		NM_000663	0.267764	8806825	8878432		NP_000654.2	500		chr16		0.0754194	0	0.0660509	0	0.107711	0	0.0219319	0.0190008	0.105451	0.0386672	0	0.0937419	0.0438873	0.0344357	0.101771	0	0	0	0.0234325	0.0856033	0.0288537	0.113688	0.237982	0	0	0.059882	0.0849945	0.0538486	0.0640145	0.0498539	0	0	0	0.205278	0.0585972	0	0	0.0666539
ABAT		NM_001127448	0.0414589	8814572	8878432		NP_001120920.1	500		chr16		0.0890943	0.0363076	0	0	0	0	0	0.0161642	0.138646	0.0440649	0	0	0	0.0646458	0	0	0.0500632	0	0	0	0	0.1035	0	0	0	0	0.0134958	0.0192052	0.0294925	0	0	0	0	0.0420166	0	0	0	0
ABCA1		NM_005502	1	107543283	107690527		NP_005493.2	2261		chr9		0	0.666206	0.348907	0.0397848	0.09278	0.0810647	1.73775	0.200246	2.40381	2.5156	0.91545	0.175242	0.0232524	0.147184	0	0.570403	0.26344	0.0486234	0.0197931	0.78992	0	1.84296	0.207567	0.100676	2.29172	1.0143	0.465176	0.0387775	0.00967893	1.60913	0.0466493	0.018894	2.05297	1.3874	0.194249	1.35671	0.828445	3.99202
ABCA10		NM_080282	1	67144147	67240956		NP_525021.3	1543		chr17		0.0333055	0.0196948	0.0150362	0.116298	0.00691465	0	0	0.00885313	0.0201827	0.0103131	0.0320137	0	0.0247231	0.0268645	0	0.0171381	0.0385928	0.0220997	0.017867	0.0462516	0	0.0280985	0.0342177	0	0	0.052166	0.119464	0.0108953	0.0164377	0.0153409	0	0.0407745	0.0121793	0.0440017	0	0.0140905	0.016345	0
ABCA11P		NR_002451	1	419223	467998		na	na		chr4		1.30135	2.73718	0.500022	0.677095	1.71845	0.523903	0.553979	0.967148	0.711677	0.570458	0.735998	0.180836	0.864957	1.89735	0.743755	1.1581	1.42402	1.62514	2.89724	0.415311	1.04319	1.14147	0.245079	0.107717	0.63511	0.47982	0.445604	0.214079	0.227344	0.544744	0.812228	0.923857	0.465122	0.481849	0.509102	0.531187	0.439443	0.898891
ABCA12		NM_015657	0.437491	215796265	215896810		NP_056472.2	2277		chr2		0.291046	0.0236283	0	0	0.0893946	0	0	0.0197843	0.0654802	0.0374171	0	0.0639174	0	0.0245725	0.0304895	0.0115167	0	0.0335056	0.0285816	0	0	0.0218127	0	0	0	0.0125191	0.0209949	0.00623108	0	0.00994313	0.012732	0	0.00984345	0.0767604	0.0198939	0	0.0166462	0.026419
ABCA12		NM_173076	0.514757	215796265	216003151		NP_775099.2	2595		chr2		1.40286	0	0.0306063	0.02419	1.34599	0	0.0322069	0.00710993	0.0653259	0.02755	0.0463762	0.959622	0	0.0929805	0	0	0.0442653	0	0	0	0	0.0105522	0.0693318	0	0	0	0	0	0.100438	0.0117905	0	0.00985409	0	0.0340411	0	0.0372091	0	0
ABCA12		NR_103740	0.0477522	215796265	216003151		na	na		chr2		0	0	0	0	0	0	0	0	0	0	0	0	0	0	0	0.0144792	0	0	0	0.0124474	0	0	0	0	0	0	0.0373232	0	0	0.0108943	0	0	0	0	0	0	0	0
ABCA13		NM_152701	1	48211056	48687091		NP_689914.3	5058		chr7		0.0155892	0.00715581	0.0819321	0.015883	0.0185265	0.0141252	0.0654037	0.0231646	0.0754869	0.0255778	0.341275	0.0139794	0.0405918	0.013081	0	0.0287555	0.0063568	0.0405263	0.00901904	0.00941863	0.0163302	0.0367527	0.120169	0	0.00784693	0.048809	0.0661661	0.0625889	0.0186638	0.0737039	0.086458	0.0732283	0.0253683	0.0927473	0.0122441	0.0115662	0.0396358	0.200435
ABCA17P		NR_003574	1	2390922	2476700		na	na		chr16		0.204366	0.0336703	0.0245614	0.12316	0.0403569	0.0330503	0.064684	0.0311782	0.0863198	0.0649796	0.0467218	0.0301985	0.0866863	0.0549813	0.0889633	0.0439832	0.0720583	0.0718377	0.0253154	0.0555274	0.0421688	0.102881	0.265111	0	0	0.0568001	0.0990395	0.0870635	0.038549	0.0859244	0.0211995	0.032458	0.0434334	0.189256	0.0449549	0.0636561	0.0235909	0
ABCA2		NM_001606	0.71257	139901685	139922740		NP_001597.2	2436		chr9		5.83242	0	1.70741	0.765665	9.67124	0.251324	1.65268	2.0988	3.86738	24.0971	0.701377	0	1.97729	3.26362	5.39265	3.78361	2.07251	0.176822	0.232798	0.843957	0.655177	0.203417	0.204509	1.96456	0.782275	1.73067	2.4521	0.565384	2.24325	1.73992	2.37926	1.54272	7.11121	1.5381	1.39158	3.49992	1.12429	3.4831
ABCA2		NM_212533	0.28743	139901685	139923374		NP_997698.1	2466		chr9		3.00875	0.210867	0.661987	0.860297	1.07185	0.314997	0.823772	0.424171	0.582563	1.03906	0.144214	0.613579	0.991771	0.354675	1.70832	0.634962	0.48965	0	1.29486	0.937516	0.0753825	0.226764	0.547095	0.193902	0.160224	0.456581	2.06916	0.129717	1.18606	1.02313	0.274725	0.259324	0	0.657638	0.140511	0.989871	0.348711	0
ABCA3		NM_001089	1	2325878	2390747		NP_001080.2	1704		chr16		11.6691	0.0766508	0.101885	5.12565	8.1923	1.48531	0.89591	0.0770998	2.11324	0.706949	0.439097	0.0845241	0.403946	0.660027	6.17691	0.169387	3.83661	0.145828	0.161054	0.234506	3.29776	0.35982	0.53785	0.300869	0.0662605	0.201587	0.282432	0.118172	0.0863825	0.474955	0.0708312	0.0588441	0.0995733	0.144797	1.48508	6.02898	0.344234	0.439366
ABCA4		NM_000350	1	94458393	94586705		NP_000341.2	2273		chr1		0.0354244	0.0255943	0.132498	0.0402528	0.0717171	0.071972	0.033125	0.0322416	0.0457499	0.047957	0.0304537	0.0265012	0	0.028555	0	0.0222428	0.0133939	0.0282094	0.084863	0.0289748	0	0.192159	0.101295	0.0139704	0.0105084	0	0.0456166	0.0291995	0.03034	0.0383374	0.0759611	0.0118163	0.0118568	0.0770673	0.0222461	0	0.0792078	0.0163896
ABCA5		NM_018672	0.846147	67240575	67311774		NP_061142.2	1642		chr17		0.232362	0.404479	0.102157	0.200624	0.775496	0.0374449	0.130881	0.232578	0.154768	0.107332	0.37094	0.0902114	0.138193	0.463975	0.180887	0.0197209	0.126592	0.0494799	0.143497	0.103742	0	0.185168	0.0848851	0.0119969	0	0.534864	0.995648	0.0798246	0.384253	0.479801	1.00453	0.487569	0.245085	0.149937	0.102105	0.182695	0.269324	0.108872
ABCA5		NM_172232	0.153853	67240575	67323323		NP_758424.1	1642		chr17		0	0.362165	0	0	0.0908056	0.223726	0.091423	0.0384067	0.0227828	0	0.0196308	0.027066	0	0.076883	0	0	0	0.735171	0.0157737	0	0	0.0271939	0	0.0222672	0	0.0306065	0.0307299	0	0.0438051	0.00880848	0.0677946	0.0417913	0	0	0	0	0	0
ABCA6		NM_080284	1	67074846	67138015		NP_525023.2	1617		chr17		0	0	0	0	0	0	0	0	0	0	0.0116823	0	0	0.00974771	0	0	0	0.039107	0.00894933	0	0	0.0254175	0.050197	0	0	0.0238308	0.0405659	0.0117165	0	0.0185255	0	0.0341617	0	0.0472953	0	0	0	0
ABCA7		NM_019112	1	1040101	1065570		NP_061985.2	2146		chr19		0.859019	0.0667909	0.279627	0.569939	1.15224	0.221247	0.764327	0.824932	0.841446	0.7099	0.796079	0.293583	3.2584	2.88732	1.83481	1.53748	0.360247	0.0903198	1.98007	0.24684	3.16724	1.00198	1.0714	1.32887	0.363652	0.831745	0.790802	0.61762	0.917888	0.325876	0.82472	0.542335	0.468414	0.223457	0.508763	2.19406	0.594272	1.157
ABCA8		NM_007168	0.750678	66863427	66951533		NP_009099.1	1581		chr17		0	0	0	0	0	0	0	0.00998243	0	0.0351788	0	0	0	0.00767481	0	0	0	0.0198704	0	0	0.0879937	0.0329787	0.0722652	0	0.110581	0	0.013291	0.0195672	0	0.69183	0	0.160569	0.0149173	0.0851649	0	0	0	0
ABCA8		NM_001288986	0.0417927	66863427	66951533		NP_001275915.1	1616		chr17		0	0	0	0	0	0	0	0	0.046565	0	0	0	0	0	0	0	0	0	0	0	0	0	0	0	0	0	0	0	0	0	0	0.0609147	0	0	0	0	0	0
ABCA8		NM_001288985	0.207529	66863427	66951533		NP_001275914.1	1621		chr17		0	0	0.0218233	0	0	0	0	0	0	0	0	0.0178968	0	0	0	0	0	0	0	0	0	0	0	0	0	0	0.0287112	0	0	0.0159605	0.0351242	0.252918	0	0	0	0	0	0
ABCA9		NM_080283	1	66970772	67057136		NP_525022.2	1624		chr17		0	0	0.0311628	0	0.00743882	0	0.0142062	0.00658339	0.0266743	0.00695409	0	0	0	0.0120906	0	0	0	0	0	0.0166365	0	0.0295041	0.0358792	0	0	0.0481571	0.0684574	0	0	0.0377802	0.0395291	0.0650855	0.170886	0.0854752	0	0	0	0
ABCA9-AS1		NR_126414	1	67000854	67014464		na	na		chr17		0	0	0	0	0	0	0	0	0	0	0	0	0	0	0	0	0	0	0	0	0	0.0901917	0	0	0.490402	0	0	0	0	0	0	0	0	0	0	0	0	0
ABCB1		NM_000927	1	87133178	87342639		NP_000918.2	1280		chr7		0.0458518	0	0.0810188	0	0.0115595	0	1.27811	0	0.0467334	0.0149941	0.159672	0	0	0.292042	10.8308	0.0165753	0.0186071	0.471546	0.490494	0.0263896	0.401086	0.0524676	0.441902	0	0	0	0.370169	0.131946	0	0.693384	0.0176819	0.0596106	0	0.0861428	0.0176823	2.64884	0.464982	0
ABCB10		NM_012089	1	229652328	229694442		NP_036221.2	738		chr1		0.622217	4.96655	0.580128	0.675635	1.4142	0.897641	0.779029	0.675919	1.16655	1.61118	1.58223	0.77812	2.09105	2.87752	1.80144	1.24676	1.38103	3.40445	10.8967	9.43255	3.05744	1.80154	1.4582	1.13321	0.62314	1.06963	0.342349	0.83381	0.839879	0.576193	1.59407	1.79878	0.826499	0.719037	0.65404	3.44357	1.65309	2.66413
ABCB11		NM_003742	1	169779448	169887833		NP_003733.2	1321		chr2		0	0.026845	0.0470525	0	0	0.0356131	0.0171054	0.0107906	0.222255	0	0.0466684	0	0	0.0118016	0	0	0	0.01636	0	0.0294596	0	0.0372627	0.0907448	0	0	0	0.0345123	0	0	0.0479287	0	0	0	0.1528	0	0	0	0
ABCB4		NM_018850	0.717329	87031360	87105019		NP_061338.1	1232		chr7		0.0581791	0.0317503	0.0647888	0	0.0637375	0.0345746	0.746542	0	0	0	0.270042	0	0	0.0278012	0.875709	0	0	0.226244	0.0338767	0.0249205	0	0.0449336	0	0	0	0.120591	0.453908	2.2912	0	0.0570948	0.043296	0.0740882	0.0272217	0	0	0	0.256776	0.042341
ABCB4		NM_000443	0.126361	87031360	87105019		NP_000434.1	1279		chr7		0	0	0	0	0	0	0	0.0401128	0	0	0	0	0	0	0	0	0	0	0	0	0	0	0	0	0	0	0.0609381	0.213333	0	0.0274799	0.0609782	0	0	0	0	0.13673	0	0
ABCB4		NM_018849	0.15631	87031360	87105019		NP_061337.1	1286		chr7		0.151693	0	0	0	0	0	0.138241	0	0.178148	0.0181705	0.0802053	0	0	0	0	0.023543	0	0	0	0	0	0.019973	0.192774	0	0	0.0716993	0	0.461959	0	0	0	0	0	0.0691341	0	0	0	0
ABCB5		NM_001163941	0.344464	20655244	20796637		NP_001157413.1	1257		chr7		0	0	0.0335777	0	0	0	0.0172495	0	0.0354648	0.0159645	0.0153926	0.0155312	0	0.0148679	0	0	0	0.0361381	0	0.0178697	0	0.0334672	0.0995866	0	0	0	0.0208798	0	0	0.0286094	0	0	0.183805	0	0	0	0	0
ABCB5		NM_001163942	0.373501	20686965	20700017		NP_001157414.1	131		chr7		0	0	0.0583064	0	0	0	0	0	0.0436468	0.0943971	0	0	0	0.0179275	0	0	0	0.0403046	0	0	0	0.0390956	0.178784	0	0	3.12841	0.16957	1.02058	3.82691	5.1676	35.3936	5.28526	10.9008	0.835178	0	0	0	0
ABCB5		NM_001163993	0.115122	20686965	20707187		NP_001157465.1	126		chr7		0	0	0	0	0	0	0	0	0	0.0426261	0	0	0	0	0	0	0	0	0	0	0	0.0239816	0	0	0	1.69132	0.019141	0.310845	1.041	0.780935	13.4437	1.45794	4.91635	0.43765	0	0	0	0
ABCB5		NM_178559	0.166914	20686965	20796637		NP_848654.3	812		chr7		0	0	0	0	0	0	0	0	0	0	0	0	0	0	0	0.0119592	0	0	0.0134535	0	0	0	0	0	0	0.536312	0	0	0.0643953	0.246189	1.65572	0.173825	0.174979	0.0575706	0.0220848	0	0	0
ABCB6		NM_005689	1	220074487	220083712		NP_005680.1	842		chr2		5.626	0.65352	2.66573	1.10205	2.88751	1.4091	11.6356	5.79771	5.32161	5.10596	15.3957	1.77791	14.5185	2.93473	0.367894	1.46214	1.17592	0.376344	1.39205	0.134096	2.12993	0.898959	0.477958	0.382057	1.59952	2.85768	7.7581	7.03177	8.86411	11.1164	11.7181	12.7879	9.86058	0.967281	4.32079	7.14448	4.48797	1.31599
ABCB7		NM_001271698	0.230336	74273006	74376175		NP_001258627.1	726		chrX		0.587186	2.71931	0.787378	1.16621	0.18127	0	0.734001	0.192055	1.49295	0.156085	0	0.166526	0	2.55907	0	1.47036	1.52586	0	5.26642	0	0	1.33347	1.51537	0	0	0	0.398608	0	1.05081	0.941807	0.828302	0.372887	1.07625	1.6191	0	0.444993	1.13363	2.11959
ABCB7		NM_001271697	0.167248	74273006	74376175		NP_001258626.1	712		chrX		0	6.51015	0	0	1.06489	0	1.82826	0	0.499333	0.900389	0	0	0.248162	1.25587	0	0.319839	1.02874	30.2834	0.5805	5.91372	0.783453	1.33378	0.146789	0.52202	0	0.155881	0.168642	0	0	1.14802	0.32262	0.912103	0	0.0927597	0	0	0	0.19796
ABCB7		NM_001271699	0.0786236	74273006	74376175		NP_001258628.1	713		chrX		0	0	0	0	0.44332	0	0	0.109279	0.218135	0.842001	0.0366301	0	0	1.38106	0	0.304353	0	0	2.58929	2.2505	0	1.46414	0	0	0	0.233521	1.13129	0	0.0932303	0	0.512849	0	0.305177	0	0.343223	0	0	0
ABCB7		NM_001271696	0.261453	74273006	74376175		NP_001258625.1	752		chrX		0.738265	0.506923	0	0	0.160319	0.448062	0	1.69597	0.19963	0.699281	2.73218	1.15142	2.71687	0.540902	1.05885	0.64844	0.503546	0	3.52642	0	0	0	0	0.693808	1.14188	1.67757	0	1.73468	0.204632	0.214684	0.244939	0.707459	0	0	0	0.944882	1.02822	1.0097
ABCB7		NM_004299	0.262339	74273006	74376175		NP_004290.2	753		chrX		0	0	0	0	0.0693962	0.987415	0	1.29314	0.0910393	0.653777	3.25036	1.61544	0.778243	0.593035	1.51926	0.618855	1.05864	0	0.307545	0	1.50916	0	0	0.581883	1.74875	0	0	0.800259	0.384552	0	0	0.839038	1.35434	0	0.920336	2.08707	1.36973	0
ABCB8		NM_001282293	0.175588	150725508	150744869		NP_001269222.1	630		chr7		0.295826	0.229316	0	1.2469	0.280517	0	3.7488	0	1.06048	0	0	0.138822	0.0723004	1.71249	0.0749082	0.204084	0.296446	0.108166	0.739533	0.743018	0	2.05186	1.20152	0	0	0	3.70211	0	0.0983557	0	0.0862602	0	0	0.240247	0.0904185	0.0584348	0	0
ABCB8		NM_001282292	0.0239382	150725508	150744869		NP_001269221.1	693		chr7		0	0	0	0	0	0	0	0	0	0	0.0367858	0	0	0.0605844	0.0683468	0.0834976	0	0.0565538	0.051008	0.375773	0	0.167763	0	0	0	0	0	0	0	0.010186	0.0413154	0.0366416	0	0	0	0	0.0348764	0
ABCB8		NM_007188	0.784567	150725508	150744869		NP_009119.2	718		chr7		2.62668	0	2.30046	2.24525	2.00671	1.10539	1.7181	4.54431	1.29175	4.72489	3.6864	2.49761	4.28988	0.885763	2.52726	3.7918	0.798975	0	7.56836	0	4.33004	1.29703	0.591028	3.40718	1.67225	5.27851	1.25119	3.79865	4.34078	5.7113	4.59764	6.86723	6.03078	0.603607	2.81054	5.20966	1.87874	5.72368
ABCB8		NM_001282291	0.0159066	150725508	150744869		NP_001269220.1	735		chr7		0.228713	0	0	0	0	0	0	0.142302	0	0	0.109733	0	0	0.0799151	0.23777	0	0.0725899	0	0	0	0.0880374	0	0	0	0.179783	0	0.109609	0.0596278	0.0664529	0.0875831	0	0.0967212	0.17709	0	0	0	0	0
ABCB9		NM_001243014	0.0154334	123405497	123451056		NP_001229943.1	681		chr12		0	0	0	0	0	0	0	0	0	0	0	0	0	0	0	0	0	0.050575	0	0	0	0	0	0	0	0	0	0	0	0.0165222	0	0	0	0	0	0	0	0
ABCB9		NM_203444	0.0121994	123409071	123451056		NP_982269.2	683		chr12		0	0.0235239	0	0	0	0	0	0.0642601	0	0	0	0.0776413	0	0.049885	0.109602	0	0	0	0	0	0	0.0881603	0	0	0	0.0403229	0	0	0	0	0	0.0418924	0.0519081	0	0	0	0	0
ABCB9		NM_019624	0.169519	123413538	123451056		NP_062570.1	723		chr12		0.772099	0.0662452	0	0	0.127019	0.284019	0.244368	0.0646234	2.08909	0	0.483405	0	0.401779	0.390211	0.146432	0.122584	0	0.124833	0.225939	0.0568105	0	0.287057	0.215344	0	0.134433	0	0.833172	0.0679169	0.155332	0	0	0.18622	0	0.398089	0	0	0	0.191615
ABCB9		NM_001243013	0.369371	123413538	123451056		NP_001229942.1	703		chr12		0.256658	0.187765	0.163457	0.674916	0.846389	0	1.62609	0.709085	0	0.244778	0.758031	0.921878	0.310622	0.784927	0	0.529725	0.423568	0	0.123451	0.0752449	0.465799	0.0555696	0.458183	0.14777	0	0.552453	0.918793	1.23552	0.311819	1.08777	0	0.848907	0.703458	0.490822	0.320284	0	0.437102	1.41076
ABCB9		NM_019625	0.433477	123413538	123451056		NP_062571.1	766		chr12		0.581924	0	0	0	0.339052	0	0.421115	1.74655	0.112837	0.606926	1.93005	0.0573435	0.247181	0	0.909203	0.701679	0.23064	0	0	0	0.176149	0.161244	0	0.339015	0.459921	1.5638	0.0639045	2.38488	1.61109	0.386147	1.11236	3.41954	1.74308	0.393143	0	0.739392	1.25299	1.85955
ABCC1		NM_004996	1	16043433	16236930		NP_004987.2	1531		chr16		3.82143	3.13119	2.52349	2.9781	2.58965	1.93623	9.55088	8.44022	3.05001	7.58696	11.9716	5.59208	9.60163	7.51734	7.21568	4.96638	5.01197	1.81033	7.08225	2.82509	4.91606	5.1561	1.59568	2.54429	2.94093	5.52973	3.60839	2.86186	4.41135	2.51272	2.79134	5.32129	4.88466	1.40753	9.47178	11.3791	9.19515	5.52587
ABCC10		NM_001198934	0.834393	43395291	43418163		NP_001185863.1	1492		chr6		1.91833	0.142272	1.18358	0.930108	1.34804	0.543418	2.11644	1.81724	0.905843	1.06692	1.20997	0.682424	2.38098	1.54021	1.72513	1.11212	0.948895	0.157114	2.03209	0.959323	1.81001	1.52445	0.145467	0.660237	1.67806	1.93931	1.42397	1.78232	2.30689	0.800261	3.33174	2.13948	1.53033	0.297844	0.574185	1.27642	2.32827	1.96266
ABCC10		NM_033450	0.165607	43399488	43418163		NP_258261.2	1464		chr6		0	0	0.454679	0.530212	0.126119	0.274069	0.0764331	0.57622	0.331713	0.145078	0.541169	0.0231313	0.50853	0.210732	0.402827	0.129798	0	0	0.405313	0.113262	0.211123	0.126033	0.680155	0.331168	0	1.15895	0.203355	0.990649	0.182552	0.0796939	0.401564	0.286947	0.420366	0.169626	0	0.440079	1.05596	0.323071
ABCC11		NM_033151	0.895675	48200821	48266182		NP_149163.2	1382		chr16		0.0243032	0.0365611	0.0385485	0	0.949884	0	0.0367687	0	0.137381	0.0294529	0.0295088	0	0.0240411	0.0398121	0.0281799	0.0360027	0.0270863	0	0.0155657	0.025502	0	0.0913909	0.291171	0.0169855	0	0.0191327	0.0699782	0.0335929	0.0367364	0.124169	0	0	0.0160792	0.0803126	0.0211025	0.0248594	0.0251849	0
ABCC11		NM_145186	0.0431482	48200821	48269088		NP_660187.1	1344		chr16		0	0	0	0	0.274629	0	0	0	0	0	0	0.101665	0	0	0	0	0	0.0371346	0	0	0	0	0	0	0	0	0	0	0	0	0	0	0	0	0	0	0	0
ABCC11		NM_032583	0.0611769	48200821	48269088		NP_115972.2	1382		chr16		0	0	0	0	8.59627	0	0	0	0	0	0	0	0	0	0	0	0	0	0	0	0	0	0	0	0	0	0	0	0	0	0.0180724	0	0	0	0	0	0	0
ABCC12		NM_033226	1	48116883	48180681		NP_150229.2	1359		chr16		0	0	0.0618892	0	1.49129	0	0	0	0.0866277	0.362827	0.00845018	0	0	0.0174357	0	0.01203	0.0210224	0.0624723	0	0.0179287	0	0.0534775	0.215554	0.0204465	0	0	0.0705329	0.0107848	0	0.041979	0	0	0	0.0708218	0	0	0	0
ABCC13		NR_003088	0.374159	15646119	15663706		na	na		chr21		0	0	0	0	0	0	0	0.089224	0	0	0	0	0	0	0	0	0	0	0	0	0	0	0	0	0	0	0.058439	0.0889097	0	0.0343979	0	0	0	0	0	0	0	0
ABCC13		NR_003087	0.625841	15646119	15673692		na	na		chr21		0	0	0	0	1.39194	0	0	0	0	0	0	0	0	0	0	0	0	0.0272425	0	0	0.0758442	0	0.105022	0	0	0	0.0181957	0	0	0.0141697	0	0	0	0	0	0	0.116596	0
ABCC2		NM_000392	1	101542354	101611949		NP_000383.1	1545		chr10		0.0811491	0.066494	0.050429	0.086989	0.0221187	0.0339413	0.861437	0.0657939	0.0653792	0.0979596	0.270037	1.28067	8.26431	5.93056	0.0381557	0.0282696	0.175151	0.431974	0.118827	0.056269	0.0309017	0.0549148	0.0579229	0	0.0639097	1.6696	4.88682	1.43365	1.61395	6.3552	2.58187	0.501753	4.1883	0.99132	8.04436	0.255544	0.311805	0.0764954
ABCC3		NM_001144070	0.230939	48712217	48745288		NP_001137542.1	572		chr17		0	0	0.48811	0.799611	0.562667	0	4.98725	2.17354	2.44344	0.809861	2.522	2.35544	1.96721	0.906837	1.44355	3.5719	0.825252	0	0	0.0672884	0	0.276666	0	0	0	0	0.0685339	0	0	0	0	0	0	0	4.28843	5.10543	1.25757	0.942644
ABCC3		NM_003786	0.769061	48712217	48769063		NP_003777.2	1527		chr17		0.168879	1.67496	0.333463	1.19733	1.60933	0.0151782	9.7009	1.69029	11.4742	2.70827	12.6223	13.3898	10.9864	2.06616	2.17086	20.5171	1.8507	1.71463	0.0143113	0.0269246	0	0.201673	0.239641	0	0.0545735	0	0.0657825	0.0705525	0.0223575	0.0655193	0	0	0	0.12401	12.0603	28.059	4.76345	4.20522
ABCC4		NM_001301829	0.204793	95672082	95953700		NP_001288758.1	1278		chr13		0.0974942	1.46447	0.337991	0.459255	0.0165864	0	0.953658	0	2.2726	0	0	0	0	0.509176	0	0.654526	0.437263	9.69352	0.352975	3.51517	0	0.350099	0.919144	0.795966	0.0876321	0	0.661187	0	0	0.0311566	0	0	0.0332724	0.837843	0	0	0	0
ABCC4		NM_005845	0.733266	95672082	95953700		NP_005836.2	1325		chr13		0.500883	3.51068	0.227089	0.480436	0	0.288788	5.87017	1.66419	1.17487	1.94219	1.56952	1.16206	1.01603	4.03852	3.54447	2.82184	1.60586	2.728	1.69634	1.89855	1.67276	0.365844	0.18891	0.140685	2.1264	0.848378	1.21123	0.908654	2.39942	4.60343	2.24722	1.86641	2.03069	0.213639	2.50066	5.64987	1.9524	2.08814
ABCC4		NM_001301830	0.033435	95748024	95953700		NP_001288759.1	784		chr13		0	0.121149	0	0	0	0.12247	0.199512	0	0.0567549	0.177604	0.10658	0	0	0.0417524	0	0.19675	0.0842053	0.468994	0.11137	0.624047	0.171517	0.0867855	0	0	0	0.0421652	0	0	0	0.153648	0.24958	0.19717	0	0.0669235	0	0	0	0
ABCC4		NM_001105515	0.0285063	95748024	95953700		NP_001098985.1	859		chr13		0	0	0	0	0	0	0	0.196973	0	0	0	0.0672879	0	0	0.0847127	0	0	0	0	0	0.458515	0	0	0.0394284	0.403458	0	0.0239638	0.0962942	0.113924	0	0	0	0.107059	0	0.235447	0.24606	0.118299	0
ABCC5		NM_005688	0.570613	183637723	183735727		NP_005679.2	1437		chr3		2.74155	0.737243	1.19296	0.898858	4.55362	0.371995	1.09739	1.26713	0.716557	2.20608	1.03818	0.580869	3.78946	1.02507	1.29404	0.146343	0.816848	0.34461	5.67127	0.89685	1.99633	2.54366	0.472277	0.492695	1.24275	2.42532	3.52937	1.47208	3.25447	1.7934	2.88118	5.22191	2.48011	0.853446	0.356077	1.06103	0.953296	3.21319
ABCC5		NM_001023587	0.429387	183701540	183735727		NP_001018881.1	208		chr3		2.58336	3.38329	0.86881	0.305817	4.37976	0	0.632998	0.699104	1.12717	1.04295	1.60572	0.265218	1.50945	1.6602	0.251125	0.345727	0.346995	4.48011	8.93115	1.98463	2.30463	3.37362	1.25427	1.38397	0.523457	0.678782	2.27682	0.681176	1.49091	0.142206	0.579134	1.62225	1.47597	1.08419	0.371882	0.447473	0.73561	1.77406
ABCC5-AS1		NR_046570	1	183724125	183729207		na	na		chr3		0	0	0	0	0	0	0	0	0	0	0	0	0	0	0	0	0	0	0	0	0	0	0	0	0	0	0.0782241	0	0	0.0748617	0	0	0	0	0	0	0	0
ABCC6		NM_001171	0.558544	16243421	16317328		NP_001162.4	1503		chr16		0.0884226	0.060199	0.0659297	0.0566828	1.84152	0.0688277	0.0791598	0.0991664	0.0731712	0.111735	0.0538941	0.211533	0.0758472	0.155839	0.617309	0.0662522	0.0623419	0.155389	0.030554	0.119565	0	0.106377	0.376435	0.0364971	0	0.0365416	0.132135	0.0273798	0.065649	0.126437	0.0250834	0.0296431	0.0260275	0.109244	0.0787147	0.157518	0.0842845	0.195263
ABCC6		NM_001079528	0.441456	16315043	16317328		NP_001072996.1	99		chr16		0.360501	1.33803	0	0	6.98591	0.194572	0	0.353986	0	0.18634	0	0.566163	0.162377	0.838006	0.927679	0.586089	0.187681	1.78858	0	0	0	0	0	0	0	0	0	0	0	0	0	0	0	0.235684	0.250915	1.85758	0	1.30615
ABCC6P1		NR_003569	1	18582569	18609607		na	na		chr16		0	0	0.0494504	0	1.69649	0.119161	0	0.0241197	0.0489142	0.0227569	0	0.0315668	0	0.0423998	0.144705	0.0423456	0	0.120055	0	0	0	0.0325629	0.138841	0	0	0	0.0378045	0	0	0.0288194	0	0	0.0431528	0.146895	0.0581186	0.0624184	0.0410785	0.0571564
ABCC6P2		NR_023387	1	14916288	14918559		na	na		chr16		0.316382	0.790421	0	0	5.89267	0	0	0.144344	0	0.205945	0	0.144342	0	0.296858	0.546784	0.601465	0	1.72796	0	0	0	0	0	0	0	0.13255	0	0	0	0	0	0	0	0.319178	0.146797	1.23425	0.105822	1.20539
ABCC8		NM_000352	0.569867	17414431	17498392		NP_000343.2	1581		chr11		0.0913902	0	0.030136	0	0.0213563	0.540823	0	0.0230193	0.0262088	0.0953869	0.0129683	0	0	0.0178805	0	0.0315282	0.055767	0.0678008	0.0135088	0	0	0.115833	0	0	0	0	0.036089	0.0119584	0	0.0401548	0	0.0261802	0	0.0490215	0.122038	0	0	0
ABCC8		NM_001287174	0.430133	17414431	17498392		NP_001274103.1	1582		chr11		0.0911623	0	0.0300607	0	0.0213031	0.0944575	0	0.0229619	0.0261432	0.0635163	0.012936	0	0	0.0178359	0	0.0314495	0.055628	0.0676288	0.013475	0	0	0.0428675	0	0	0	0	0.0359986	0.0119286	0	0.0400549	0	0.026115	0	0.048899	0.121733	0	0	0
ABCC9		NM_020297	0.964724	21950323	22089628		NP_064693.2	1549		chr12		0.0160576	0.0532307	0.213691	0.0203005	0.0127669	0.302822	0.0529782	0.020943	0.0468629	0.0197695	0.0402315	0	0.098393	0.0739115	0.0708714	0.0337843	0.0356722	0.128011	0.0801391	0.105042	0.0255232	0.0907045	0.0459909	0.0453922	0.418151	0.0256939	0.056762	0.0440524	0.0861841	0.0275907	0.0204527	0.0279073	0.0167257	0.0811544	0.0780431	0.0277911	0.0903553	0.199001
ABCC9		NM_005691	0.0352764	21958107	22089628		NP_005682.2	1549		chr12		0	0	0	0	0	0	0	0	0	0	0	0	0	0	0	0	0	0	0	0	0	0	0	0	0	0	0	0	0.0807119	0.0177957	0	0	0	0	0	0	0	0
ABCD1		NM_000033	1	152990322	153010216		NP_000024.2	745		chrX		3.57959	0.11468	1.98158	3.74409	1.62309	0.593651	4.94597	8.42149	4.33328	4.11631	9.39792	2.73918	2.7031	0.84	1.07262	3.19291	0.388883	0.0290134	1.61492	1.5203	0.354967	1.30942	0.977513	0.931462	0.385597	21.6702	11.4102	25.0398	19.9154	2.81288	6.57783	4.02655	19.4291	9.05857	0.429567	1.80497	2.13061	4.38888
ABCD2		NM_005164	1	39945021	40013843		NP_005155.1	740		chr12		0	0	0.0419394	0	0.0074089	0	0	0.0269167	0.0325968	0.0152581	0.0167947	0	0	0.0128953	0	0	0	0	0	0.0113503	0	0.0270871	0.167948	0.085101	0.0268348	0	0.0520789	0.0134164	0	0.0252334	0	0	0	0.129496	0	0	0	0
ABCD3		NM_001122674	0.122232	94883932	94944260		NP_001116146.1	236		chr1		0.696934	0.970115	0	0	0.555013	1.7269	1.09161	0.799094	0.353727	0.153664	1.75751	0.628665	0.330904	0.263382	0	0.617477	0.620228	2.29881	2.72339	0.864889	1.18763	1.07334	0	0	0.833985	0	0.215321	0.406242	0.247407	0.116151	0.649004	0.43155	0.178637	0	0.970183	0.430414	0	0.234081
ABCD3		NM_002858	0.877768	94883932	94984219		NP_002849.1	659		chr1		1.63653	12.8098	2.40962	1.70533	2.33908	1.97462	6.80887	3.4246	5.6924	6.5617	9.08374	4.01152	3.49152	8.17154	3.60908	4.73194	3.75788	4.92732	20.8287	3.94509	1.36511	4.49846	0.83935	0.585083	1.70694	2.89829	3.28522	2.52209	2.80634	1.08492	5.21917	1.90183	2.6676	1.15698	1.89841	8.50568	2.55419	3.76012
ABCD4		NR_003256	0.5454	74751979	74769767		na	na		chr14		1.5791	3.62378	0.452514	0.732971	2.07851	0	1.08619	0.209348	2.72587	0.65493	1.98596	0.242998	1.09787	4.22223	1.82125	0.556061	1.41867	3.89177	8.84692	1.07071	0.106494	2.61282	0.800972	0.76765	0.601902	0.303699	1.24219	0.359451	0.363383	1.47851	2.0302	0.94418	1.36687	0.892876	0.10042	0.717623	0.998152	0.977074
ABCD4		NM_005050	0.4546	74751979	74769767		NP_005041.1	606		chr14		0.779915	0.229984	0.106626	0	1.22655	0.489157	0.259888	0.992913	0.233905	1.75526	1.07267	1.24927	0.641001	0.543257	0.759827	1.32361	0.915418	0	1.27048	0	0.694177	1.03815	0	0	0.861132	1.52833	0.051712	2.18628	0.855121	0.0234131	1.05854	2.47624	1.48449	0.368296	1.17308	1.38166	1.46147	1.31712
ABCE1		NM_002940	0.854362	146019155	146050676		NP_002931.2	599		chr4		3.49539	28.4863	2.62332	3.82773	5.20923	0.624665	5.00438	4.07351	4.70294	3.50276	9.75049	4.00279	9.73117	13.4794	5.36821	7.25448	7.78158	0.56174	25.9662	12.0486	10.4116	10.5017	0.149652	2.87392	7.04224	4.69268	1.33761	2.31541	3.02262	1.00323	6.37571	6.18217	3.85999	0.111597	3.00041	8.92684	6.49371	4.28656
ABCE1		NM_001040876	0.145638	146019155	146050676		NP_001035809.1	599		chr4		0	0	0	0	0.308972	2.52426	1.74363	0.183354	0	0.631826	0.447403	0	0	3.69044	0.914293	0.724697	0.85248	24.3902	2.83871	0.949366	0.7572	0.813132	5.3293	0	0.33529	0.602346	0	0	0.401039	0.235676	0.348424	0.918534	0.242366	1.78527	0.167097	1.10525	0	0
ABCF1		NM_001090	0.0776288	30539169	30559309		NP_001081.1	807		chr6		0	0	0.0901263	1.6668	0.240692	0	0.512347	0.0938844	0.451062	0.0814275	0	0	0.062537	0.0365318	0	0	0	0	6.9928	0	0.525894	0.157308	0.92368	0	0	0.0564451	0	0.0412528	0.227369	0.7792	0	0	0.0612312	0.569049	0	0	0.303013	0
ABCF1		NM_001025091	0.922371	30539169	30559309		NP_001020262.1	845		chr6		4.95941	6.7088	2.39951	0.748811	3.99346	2.58087	6.57562	11.5772	1.27942	4.33692	7.27495	2.70758	6.7985	3.92456	6.68073	3.48289	1.46952	1.16236	2.42649	2.12062	13.5834	2.1455	0.575899	4.06335	5.73802	5.77664	1.94498	10.4916	3.18915	1.31691	7.81382	7.9979	9.41402	0.237292	1.51358	6.76965	11.2209	4.97939
ABCF2		NM_005692	0.0690049	150904922	150924460		NP_005683.2	634		chr7		0.340644	0.0608736	0.136305	0.369834	0.0768463	0.0967658	0.092176	0.649784	0.309112	0.617599	1.01136	0.47891	2.17399	0.334607	2.4236	0.0924992	0.138492	0	0.111277	0.112257	1.89175	0.191889	0.554974	0.237786	0.619669	0.686175	0.229676	1.99865	0.280843	0.132059	0.249104	0.294921	0.596586	0.0760076	0.132584	3.47926	0.342524	2.30483
ABCF2		NM_007189	0.930995	150908569	150924460		NP_009120.1	623		chr7		9.87735	3.25432	5.6956	7.16191	5.19188	4.04718	22.9494	7.14157	5.27094	9.19533	10.7597	3.3293	9.16444	12.9545	12.5251	11.363	5.65009	0.874029	22.8375	7.8884	14.3571	14.6692	5.9638	7.95325	10.1241	12.7937	10.5772	10.4941	3.82297	11.4879	11.0538	19.4374	13.5809	2.40956	5.53725	13.0293	13.1207	17.8765
ABCF3		NM_018358	1	183903862	183911795		NP_060828.2	709		chr3		6.59267	0.645467	3.16323	2.63803	12.8557	1.48073	8.55649	5.56798	4.27621	7.51055	7.5721	2.56058	5.67995	6.90601	4.11095	3.66633	3.6654	0.198467	10.1972	2.03026	4.38643	3.56308	3.57398	3.31668	3.49478	5.06838	4.47674	6.63857	6.31692	4.37836	6.68823	11.5318	7.16611	1.9665	2.0451	4.9423	5.4027	7.17103
ABCG1		NM_207627	0.0219766	43619798	43717354		NP_997510.1	668		chr21		0	0	0.0635366	0	0	0	0	0	0	0	0	0	0	0.0160011	0	0	0	0.0560747	0	0	0	0	0	0	0	0	0	0	0	0.054224	0	0	0	0	0	0	0	0
ABCG1		NM_207628	0.0543381	43619921	43717354		NP_997511.1	644		chr21		0	0	0	0	0	0	0	0	0	0	0	0	0	0.0531739	0	0	0	0	0.0268759	0.119642	0	0.0883596	0	0	0	0	0.04299	0	0	0.0206906	0	0	0	0	0	0	0	0
ABCG1		NM_207629	0.140695	43636186	43717354		NP_997512.1	663		chr21		3.80564	0	0	0	0.810792	0	0	0	0	0	0	0.372335	0	0	0	0	0	0	0.917271	0.112868	0	3.31901	1.80074	0	0	0	0	0	0	0	0	0	0	0	0	0	0.0380765	1.28367
ABCG1		NM_016818	0.256027	43639266	43717354		NP_058198.2	666		chr21		0	0	0	0	0.8463	0	0.950497	0	0.214498	0	0.0480483	0.392513	0.085947	0	0	1.58034	0	0.677333	0	0	0	5.59681	0	1.25877	0	0.130312	0	0	0	0	0.0372533	0	0	0	0	0.530019	0	0
ABCG1		NM_004915	0.331995	43639266	43717354		NP_004906.3	678		chr21		1.5544	0	0.0615956	0	0.0338307	0	0.234304	0	0.219908	0.20628	0	1.39384	0	0.0721137	0.0908067	1.5061	0	0	1.08013	0	0	2.54008	0.45188	0.947672	0	0.0376363	0.0730467	0.0150726	0	0.0524454	0	0	0	0.0880261	0.161799	0.59983	0	0.589164
ABCG1		NM_207174	0.194968	43640007	43717354		NP_997057.1	677		chr21		0.669781	0.0550891	0	0	0	0	0	0	0.285353	0.0862509	0	0	0	0.24547	0	0.213293	0	0	0	0	0	3.04747	0.886722	0	0	0.0377567	0.0288179	0	0	0.0128328	0	0	0	0	0	0.139935	0.154608	0
ABCG2		NM_004827	0.838298	89011415	89080011		NP_004818.2	655		chr4		0.311064	0.341459	0.146035	0	0.0842208	0.0776622	4.44629	0.0542148	0.0809489	0.193869	0.0786127	0.245089	4.38932	0.210742	0.0416771	1.56188	2.14886	0	0.159114	0.068614	0.0714183	0.354391	0.965637	2.09696	0.0407651	0.456466	0.30131	0.337657	0.0501093	0.136932	0.27547	0.355035	0.270321	0.155323	1.27364	0.0661308	0.845526	0.11931
ABCG2		NM_001257386	0.161702	89011415	89152474		NP_001244315.1	611		chr4		0.0743034	0	0.0502797	0.0662191	0	0	0.0216254	0	0	0	0	0.0278247	0	0	0.0625247	0.161862	0.0409249	0.0855038	0.107964	0	0	0	0.178789	0	0.0762015	0.0553035	0.0314073	0	0	0.0218207	0	0	0	0.0609622	0	0	0	0
ABCG4		NM_022169	0.98277	119019749	119033374		NP_071452.2	646		chr11		0.171707	0.0969076	0.201649	0	0.292555	0.573516	0.331272	0.109458	0.129133	0.189145	0.209794	0.132475	0.0854957	0.621904	0.127999	0.147583	0.0976512	0.186225	0.130334	0.062442	0.0452622	0.318492	0.256886	0.0770076	0.0938355	0.147118	0.193369	0.124745	0.303095	0.308424	0.0675628	0.0817083	0.242966	0.160185	0.106887	0.110662	0.154111	0.140299
ABCG4		NM_001142505	0.01723	119020298	119033374		NP_001135977.1	646		chr11		0	0	0	0.0531755	0	0	0	0	0	0	0	0	0	0	0	0	0	0	0	0	0	0	0	0	0	0	0	0	0	0.0107892	0	0	0	0	0	0	0	0
ABCG5		NM_022436	1	44039610	44065958		NP_071881.1	651		chr2		0	0	0.0390942	0	0.0249422	0.0331641	0	0.0297926	0.0571337	0.0173675	0.0225419	0	0	0.0122763	0	0.0414794	0	0	0	0	0	0.0191942	0.183636	0	0	0.182925	0.266724	0.154166	0.104828	0.0519741	0.154037	0.258696	0	0.136776	0	0	0	0
ABCG8		NM_022437	1	44066102	44105605		NP_071882.1	673		chr2		0	0.0233179	0.0793538	0	0.0267079	0.043805	0	0	0.061924	0.0378407	0	0	0	0.0343363	0	0.0390289	0	0.104208	0	0.0679765	0	0.128076	0.278837	0	0	0	0.0773835	0.0188836	0	0.057083	0	0.032128	0	0.206648	0	0.0435673	0	0
ABHD1		NM_032604	1	27346656	27353680		NP_115993.3	405		chr2		0.703748	0.0358783	0.146343	0	1.78103	0.117514	0.182538	0.091134	0.298835	0.217166	0.105942	0.0483853	0.101236	0.114121	0.323199	0.0961732	0.0806228	0.056067	0.0432788	0.149904	0.106505	0.177093	0.744372	0.269992	0	0.0906817	0.14079	0.0836023	0.0679665	0.747449	0.146632	0.0680831	0.0744845	0	0.363943	0.130413	0.133301	0.164189
ABHD10		NR_073571	0.231088	111697722	111712215		na	na		chr3		0.910232	0	1.55874	0.738241	1.28022	0.112046	2.31328	0	1.26249	0.703689	0.236669	0	0.937919	9.83997	0.811211	0.0472224	1.7517	6.90264	3.00759	10.7803	0	5.94799	0.604724	0.215343	0.433898	0.35143	3.02768	0.0816799	0.121561	0.22718	0.234876	0	0.427852	1.49824	1.07183	0.0703475	1.35411	0
ABHD10		NR_073570	0.056369	111697722	111712215		na	na		chr3		0	5.66336	0	0	0	0	0.630964	0.115274	0.294388	0.48336	0.728784	0.475196	0	1.44483	0.183527	0.287047	0	2.02671	1.5305	0.231162	0	0.326269	0	0	0	0	0	0.385713	0.741199	2.26094	0	0.294623	0	0	0	0	0	0
ABHD10		NM_018394	0.6952	111697722	111712215		NP_060864.1	306		chr3		2.29854	5.16168	2.10574	2.31062	3.52295	0.888641	3.03651	2.29359	1.16074	2.67718	3.38672	2.42275	3.31713	32.8268	3.04635	4.80998	4.07615	0	11.8997	0.449218	1.28237	1.06655	0.547221	0.338731	2.57569	4.30359	1.9119	1.92546	2.99075	0.672557	6.94102	6.48008	5.45607	1.48195	1.07841	2.23104	1.69806	3.03854
ABHD10		NM_001272069	0.0173433	111697722	111712215		NP_001258998.1	205		chr3		0	0.135498	0	0	0.110645	0	0	0	0	0.0388599	0	0	0.0997535	2.78901	0	0	0.108862	0.427902	0.114767	0.341183	0.163452	0.200171	0	0	0.0604299	0.226913	0	0	0.109992	0	0	0.0918734	0	0	0	0.0893533	0.105807	0.0956139
ABHD11		NM_001145364	0.112365	73150424	73153184		NP_001138836.1	258		chr7		1.83967	0.225776	0.258602	0	1.17878	1.93655	3.73796	1.2867	0.301022	1.27203	0.546422	0.633738	0.607051	0.914405	0.770069	2.56041	2.60976	0.0985796	1.33716	0	0.691629	1.68312	0	0.654763	0.496792	0.801003	0.436889	0	0	1.23201	0.999607	0.584206	0.912428	1.26134	0.258354	0.229352	0.605227	2.21912
ABHD11		NM_001301058	0.121428	73150424	73153197		NP_001287987.1	159		chr7		0	1.35875	0.448113	0.872978	2.59213	2.33561	0.864933	0.580928	1.31865	0.370642	0	0	0	0.321868	0.144932	0.169837	1.20171	0.330853	1.49262	3.95359	0	1.63039	1.53537	0	0.363953	0	0.0894509	0.0645661	0	1.32469	0.120734	0.306663	0.177248	0.719073	0.459874	0	0	0.320353
ABHD11		NM_148913	0.27573	73150426	73153184		NP_683711.1	308		chr7		10.5504	0.50845	0	0	14.7391	0.430485	9.66604	0.762573	0	1.2196	3.24219	5.65973	7.61912	3.62541	10.801	1.05052	2.59221	0	3.47013	0.878384	0.776185	0.851228	0.782139	0	0	1.2465	2.44277	2.30699	1.26419	4.08974	0.127086	5.57643	5.37866	0	0.495919	0	2.06617	7.90302
ABHD11		NM_148912	0.23305	73150426	73153184		NP_683710.1	315		chr7		2.32389	0	1.15466	2.41204	0.134327	0	0	0.254965	2.6283	0.682191	0.895348	1.45549	15.6569	2.11966	2.73803	6.89603	4.53671	0	0.395632	0	2.29441	0	0	5.0312	1.85306	3.02442	0	1.61644	0	0	2.79319	2.52687	0	0.455595	2.24603	4.35072	0.526407	0
ABHD11		NR_026910	0.000483981	73150426	73153184		NP_001308311.1	202		chr7		0	0	0	0	0	0	0	0	0	0	0	0	0	0	0	0	0	0	0	0	0	0	0	0	0	0	0	0	0	0	0	0	0	0	0	0	0	0
ABHD11		NR_026912	0.256944	73150426	73153190		na	na		chr7		7.9725	0	0.872763	3.49472	4.80743	2.23296	2.1456	1.3088	4.96352	0.847391	1.88122	0.908221	7.98493	2.1623	7.78358	2.76071	2.23307	0	0.952371	0.139973	0.846977	0.744707	3.11126	2.45761	0.398118	2.35094	1.49214	1.85829	1.23131	2.54926	2.02625	2.52586	3.24471	2.2062	0.574343	1.32664	1.46975	5.5028
ABHD11-AS1		NR_026690	1	73149398	73150330		na	na		chr7		0	0	0.256328	0	0.831158	0	0.833802	0.275136	0	0.380599	0.20085	0	1.8837	0.420087	0.498413	1.33844	0	0	0.644445	0	0	0.13686	0.636273	0.452596	0	2.87256	0.278292	0.151162	0.234184	0.949469	0.306243	0	0	0	0.251512	1.31429	0	1.28592
ABHD12		NM_015600	0.0904255	25275378	25371618		NP_056415.1	404		chr20		2.19173	2.60424	0.97157	0.799311	2.19301	2.57937	2.76062	1.31768	0.41287	2.34152	0.529939	1.49373	0.852175	0.563633	0.169829	0.800767	0.410484	1.13497	0.988052	0.719324	0	0.29889	0.770078	1.03869	0	0.854459	1.01897	0.499266	0.897126	0.119267	1.13305	0.965644	0.297108	0.184386	2.03355	0.456045	0.687274	2.83607
ABHD12		NM_001042472	0.909575	25280833	25371618		NP_001035937.1	398		chr20		12.2286	2.20091	13.1678	14.0556	15.2887	11.1901	34.0091	21.2679	12.5934	22.8979	12.4756	14.7389	7.22762	4.58943	6.0853	23.4673	12.0678	0.344618	29.6768	8.62706	1.92869	11.838	24.1918	15.2901	5.36259	15.8336	25.7369	16.86	24.233	10.8802	25.7678	17.7228	13.7932	6.58388	10.3666	13.7184	25.305	27.7731
ABHD12B		NM_181814	0.861116	51338877	51371688		NP_861535.1	285		chr14		0	0	0	0.193545	0	0	0	0.121467	0.169314	0.135037	0.159033	7.86391	0.269948	0.19475	0	0	8.4494	5.30285	0	0.210758	0	0.0825578	0	0	0	0.374867	0.0568355	0.13182	0	0.0496827	0.0660674	0	0	0.0865011	0	0	0.0927938	0.118402
ABHD12B		NM_001206673	0.138884	51338877	51371688		NP_001193602.1	362		chr14		0	0.0726206	0.0749283	0	0.072424	0	0	0	0	0	0	0.173565	0	0	0	0	0	0.75861	0	0	0	0	0	0	0	0	0.0879901	0	0	0.0487877	0	0.0585305	0.0718309	0	0	0	0	0
ABHD13		NM_032859	1	108870762	108886603		NP_116248.2	337		chr13		0.629098	1.01237	0.352413	0.76183	1.17756	0.325616	1.00294	1.55418	0.915557	1.24327	0.870817	0.918929	1.29058	1.34792	0.884963	0.83737	0.795571	2.2772	3.16346	2.80815	0.388693	1.01748	0.441847	0.190852	1.03099	0.674303	0.2913	0.280618	0.359421	0.294337	1.0873	0.771885	0.473798	0.278943	0.410376	1.37613	0.424447	0.465468
ABHD14A		NM_015407	1	52009041	52015216		NP_056222.2	271		chr3		0.860782	0.348481	3.52444	7.39447	2.71874	3.97781	11.357	6.94144	6.99928	8.25211	2.47171	1.89723	6.18025	2.69011	7.62565	3.85563	9.70627	0.104145	13.1391	7.93244	2.02157	8.59555	6.56638	22.168	5.2206	4.76581	6.75012	11.6742	7.35746	18.4748	7.81649	5.0364	13.9561	4.53115	4.59073	6.19472	4.72689	12.8471
ABHD14A-ACY1		NR_037192	1	52009041	52023218		na	na		chr3		0	0	0	0	0	0.143828	0	0	0	0.146064	0	1.41113	0.304917	0	0	0.208581	0	0	0	0	0	0	0	3.09902	0	0.280413	0	0	0	0.0157518	0	0	0	0	0.218829	0	0.411173	0
ABHD14B		NM_001254753	0.398755	52002525	52008646		NP_001241682.1	172		chr3		5.22845	1.62748	2.75973	2.79003	14.1285	0.609001	12.8358	0	1.46432	1.31925	3.04466	5.19366	1.84001	17.3736	2.62986	3.49408	4.67288	1.0019	12.8073	12.5167	2.58698	2.69797	23.5713	6.00744	1.95431	8.72303	13.8934	2.31726	7.19287	12.3099	4.1261	4.74434	4.71405	12.4688	1.54411	0	2.79885	2.48408
ABHD14B		NM_001146314	0.397527	52002525	52008646		NP_001139786.1	210		chr3		1.25552	0	1.30865	2.19316	7.05745	1.23622	6.03858	3.88421	3.02909	3.85215	1.71058	3.17725	13.4718	2.4281	5.77051	3.48886	6.86152	0	4.48697	0.622902	2.81692	0.233764	1.07727	14.4072	8.69669	8.85068	9.95005	12.5713	8.34028	5.36451	11.1256	12.5466	24.227	4.14669	3.02314	7.00209	4.0657	11.3406
ABHD14B		NM_032750	0.203718	52002525	52008646		NP_116139.1	210		chr3		0.694352	0	0.910429	2.62858	2.47365	0.589575	1.69679	1.64469	1.44727	1.77368	1.76193	2.04035	4.14602	0.442947	2.10877	2.80901	3.40643	0	1.13861	0.251185	6.15877	0.395899	0	8.73842	3.26711	3.84004	2.04441	8.72664	4.88391	10.8334	3.54378	4.34757	6.89884	3.26878	2.13671	4.11638	1.78649	6.50001
ABHD15		NM_198147	1	27887688	27894042		NP_937790.2	468		chr17		1.349	1.22788	0.606638	1.26945	2.24089	0.574163	3.79736	0.718607	2.42731	1.54191	2.56276	1.54322	3.13994	1.90719	2.05332	2.22346	0.449845	0.737315	3.43333	1.31836	0.413971	0.958985	2.33486	1.62713	1.0602	2.98559	1.12577	1.62391	1.2173	2.18649	2.7478	3.20023	0.731738	0.848072	1.95645	3.6796	1.77851	1.28292
ABHD16A		NM_001177515	0.0154004	31654725	31670850		NP_001170986.1	525		chr6		0	0.0964977	0	0	0.0624408	0	0	0.0458627	0	0.0404034	0.0856999	0	0	0.176853	0	0.0567587	0	0	0	0.0854863	0	0.259968	0	0	0	0	0.0489671	0	0	0	0	0	0	0	0.201885	0	0	0
ABHD16A		NR_033488	0.00535523	31654725	31670850		na	na		chr6		0	0	0.111809	0	0	0	0	0	0	0	0.0389189	0	0	0	0	0	0	0	0	0	0.0925519	0	0	0	0	0.186493	0	0.0408299	0	0.0326834	0	0	0	0	0	0.0804574	0.0422682	0
ABHD16A		NR_033489	0.301176	31654725	31671137		na	na		chr6		2.00106	0.787151	0	0.487998	2.3408	0	8.32452	0.465453	0	0.317213	0.519477	0	1.07128	2.27788	0	0.884417	0.310813	0.408856	9.45734	0.873638	1.19326	0.931058	0.932158	0.402421	0.927916	0.391405	1.58428	0	0.359229	1.19562	1.26214	2.35949	1.0951	0	0.265807	0.330646	0	1.24443
ABHD16A		NM_021160	0.678069	31654725	31671137		NP_066983.1	558		chr6		0.782054	0.143689	1.00477	0.879786	3.23458	0.799548	0.263106	3.21947	1.395	3.38051	2.14121	3.90065	3.49518	0.514102	2.97993	1.81247	0.961224	0	4.11589	0.693696	6.37061	0.741178	0	1.64556	1.33319	8.60383	0.191276	3.21666	1.5353	0.204535	3.46183	2.22414	2.63294	0.184181	0.391859	3.98821	4.85105	2.01267
ABHD16B		NM_080622	1	62492565	62494341		NP_542189.1	469		chr20		1.47423	0.171906	0.981754	3.32459	2.90255	0.443318	0.4932	1.22339	1.68532	1.66557	0.607224	0.462009	1.99174	0.570554	1.09738	2.52212	0.684781	0.322696	4.68955	0.677097	1.13082	2.13545	1.04933	0.579912	0.785266	0.961416	1.63634	2.14842	1.5936	0.902652	2.46948	1.45724	3.66722	1.91069	0.691899	1.85578	1.5007	5.56184
ABHD17A		NM_001130111	0.974767	1876974	1885518		NP_001123583.1	310		chr19		5.46323	0.343875	5.75893	13.2585	4.11279	2.95096	12.7761	7.16863	13.8721	9.7452	5.04394	2.35062	3.87469	5.82077	4.80457	2.82732	4.99816	0.19762	18.5359	2.1294	4.43293	2.54579	3.16787	2.86774	4.35527	4.08398	10.8182	11.5612	5.86848	4.37615	7.81849	12.7143	11.1489	8.37692	2.15058	8.23366	3.6174	4.4247
ABHD17A		NM_031213	0.025233	1876974	1885518		NP_112490.3	361		chr19		0	0.0774147	0.235041	0.306415	0.0411693	0	0.300119	0.160561	0.177491	0.0802941	0.0691209	0.0630673	0	0.17334	0.158319	0.0559054	0.131272	0	0.42416	0	0	0.0707321	0.216817	0.0817933	0.132715	0.0903248	0.112981	0.283891	0.124174	0.143583	0.238977	0.19292	0.281996	0	0.0972577	0.195781	0.209931	0.0981576
ABHD17B		NM_016014	0.0066952	74477367	74526148		NP_057098.2	293		chr9		0	0	0	0	0	0	0	0	0	0	0	0	0	0	0	0	0	0	0.132137	0	0	0.0337216	0	0	0	0	0	0.0491213	0	0	0	0	0.304011	0	0	0.248361	0	0
ABHD17B		NM_001025780	0.993305	74480067	74526148		NP_001020951.1	288		chr9		0.680653	3.2997	0.749089	1.42625	0.857966	0.578562	1.8015	0.760176	2.65448	3.73424	2.5053	0.904065	1.66699	2.30313	1.30978	2.28079	2.72598	4.67878	16.8641	3.22182	0.989423	5.31833	0.17689	0.107843	1.15307	1.70242	0.968659	1.19656	1.00677	1.99632	1.00263	1.8842	2.0337	1.89966	1.08386	1.67244	1.41519	1.04504
ABHD17C		NM_021214	1	80987651	81047962		NP_067037.1	329		chr15		11.0945	13.3715	1.43697	1.01795	2.84837	1.39212	2.83214	4.14321	3.66629	1.44111	6.15784	12.533	10.7756	9.37504	3.57543	8.867	31.7434	18.0573	2.63327	1.67871	0	0.444393	2.27991	1.41472	1.34377	7.26204	16.2205	2.06896	6.28097	2.07979	5.59038	6.37965	10.3657	5.45809	1.84805	6.11982	3.02357	3.46391
ABHD2		NM_152924	0.977592	89631380	89745591		NP_690888.1	425		chr15		3.91476	3.16038	1.9041	1.59789	3.32594	2.09733	10.5565	13.877	7.59073	5.68192	8.3785	35.9579	14.1402	2.91961	3.64133	9.81385	7.187	7.32214	3.58617	2.41126	4.10469	2.24176	2.77056	8.42309	5.43203	10.0361	38.4937	3.38149	20.4704	2.59375	4.712	6.19637	8.5453	4.47676	3.77389	10.5797	5.43566	5.81084
ABHD2		NM_007011	0.0224077	89631380	89745591		NP_008942.3	425		chr15		0.0611008	0	0.0205141	0	0.0977846	0.303956	0.0271049	0.321175	0	0.12159	0.118347	1.27301	0.841313	0.0901896	0.136575	0.238555	0.144151	0	0	0	0.0397783	0	0.205228	0.139645	0.0670955	0.194361	0.777318	0.0191195	0.497811	0.0721645	0	0.129313	0.0795426	0.029837	0	0.0884756	0.0895043	0.0910193
ABHD3		NM_001308257	0.197222	19230857	19244175		NP_001295186.1	214		chr18		0.543134	9.52281	0.180674	0.544202	0.387483	0.159351	0.854487	0.204612	0.288536	0.679962	0.719359	0.230776	0.519424	4.9207	0.423429	0.434315	1.6559	14.7125	5.70664	2.34348	0.39946	0.800234	10.2296	2.29132	0.179694	0.192076	0.142806	0.0931228	0.23646	0	0.607251	0.153724	0.203624	0	0.130131	0.315935	0.176585	0.289585
ABHD3		NM_001308256	0.146993	19230857	19284766		NP_001295185.1	356		chr18		0.430304	0.801464	0.128532	0.406048	0.209679	0.426007	3.54797	0	0.242494	0	0.132019	0.467205	0.618744	4.07109	0	0.117003	1.99546	0.572575	0.579178	0	0	0.935644	0	0.901193	0.12713	0.441858	1.35713	0.192305	0	0.114142	0	0	0	0.58162	0.775979	0.0908692	0	0
ABHD3		NM_138340	0.655785	19230857	19284766		NP_612213.2	409		chr18		1.00348	3.23463	0.464082	0.466043	0.960552	0.469281	6.27473	1.84029	1.05518	1.79236	3.22768	1.42478	3.64663	3.52775	3.11827	0.854932	4.96872	0.0814061	12.002	1.39301	1.38569	0.671836	11.1867	19.4306	1.20525	1.71754	1.83741	0.836852	1.73869	0.467553	2.44887	1.31898	2.00019	0.220936	0.586014	2.59122	1.58296	2.65319
ABHD4		NM_022060	1	23067146	23081265		NP_071343.2	342		chr14		2.58655	2.64296	5.53334	6.57569	4.81998	2.25095	13.0831	24.7806	8.01887	16.7397	14.1415	9.97597	11.2794	5.60911	4.19432	2.52312	4.65946	0.0950471	0.0873859	0.726363	1.29128	0.594013	2.04069	1.43	3.84136	5.42424	7.61132	5.03626	3.78336	5.98855	6.60062	7.50123	5.94319	1.67527	10.69	7.45607	9.57602	17.24
ABHD5		NM_016006	1	43732374	43764217		NP_057090.2	349		chr3		0.95086	6.58058	0.910782	0.722499	3.23979	0.879493	3.97221	1.34151	1.30387	1.97887	2.17607	0.41527	2.09092	2.37815	1.19665	0.645387	1.19275	1.20813	2.73359	1.15935	1.68693	1.03927	0.883836	0.475305	0.461147	1.62065	1.08827	0.952601	0.968537	0.515855	1.65275	1.0709	1.21363	0.683862	0.45975	1.13487	1.35404	1.60135
ABHD6		NM_020676	1	58223258	58280461		NP_065727.4	337		chr3		0.282339	1.29418	0.832587	1.43484	0.556925	0.254198	2.83207	1.18241	2.25661	1.88964	1.04981	0.69087	1.95081	2.27396	1.56982	0.487221	2.88423	1.05144	1.96684	0.243842	0.334235	1.439	1.68845	1.21602	0.592097	3.44821	2.76623	3.08944	3.4279	2.55448	4.12327	2.65532	5.11524	2.06136	0.669757	1.94194	1.05325	1.43848
ABHD8		NM_024527	1	17402939	17414282		NP_078803.4	439		chr19		0.908243	0.096338	2.45483	9.2408	2.56633	1.53597	1.99371	7.09135	9.99592	6.04432	3.25255	0.878361	0.558853	0.674031	0.84924	0.665926	0.267845	0.279655	1.88526	0.233543	0.806822	2.03726	1.99548	0.887248	1.08862	0.633292	2.75427	1.95101	2.0023	2.28881	1.62338	1.10751	2.71592	1.44572	0.69298	2.02279	2.9744	1.51737
ABI1		NM_001178125	0.00973691	27035524	27150016		NP_001171596.1	329		chr10		0.121001	0	0	0	0.0917582	0	0	0	0	0	0	0	0.0483318	0	0	0.0585087	0	0	0.268398	0.957899	0	0	0.705437	0	0	0.0313912	0	0.0417701	0	0	0	0.0498145	0.0485048	0	0	0	0.0336088	0
ABI1		NM_001178124	0.0932708	27035524	27150016		NP_001171595.1	388		chr10		1.06464	0	0	0	0.799241	0	0.243753	0	0	0.0818361	0.188539	0.657835	1.61637	1.81163	0.316914	0.510247	2.05303	1.16657	8.14663	1.05365	0.395822	1.73893	0	1.00443	0.0948169	0.172068	0.399239	1.87356	0.0509802	0.0737618	0.247804	0	0.298574	0.680789	0	0.268226	0.152589	0.10968
ABI1		NM_001178121	0.297181	27035524	27150016		NP_001171592.1	446		chr10		1.73058	2.65817	0.270245	0	1.54976	0.578415	0.475457	0.297412	0	0.371456	1.03528	1.45192	1.75875	1.74154	1.95986	1.82929	2.71201	4.34128	2.25317	2.95815	1.22314	2.55042	1.38485	2.20999	2.14967	0.637979	0.5404	2.17691	0.0605831	0.881048	1.44485	0.724839	1.82138	0.29124	1.40984	2.01467	0.7981	1.09707
ABI1		NM_001178123	0.000359701	27035524	27150016		NP_001171594.1	393		chr10		0	0	0	0	0	0	0	0	0	0	0	0	0	0	0	0	0	0.147031	0	0	0	0	0	0	0	0	0	0	0	0	0	0	0	0	0	0	0	0
ABI1		NM_001012752	0.458391	27035524	27150016		NP_001012770.1	476		chr10		1.44478	2.78013	1.34137	1.56876	1.43499	1.38084	1.95183	2.8892	0.867092	1.69525	1.82818	0.256552	3.48799	3.23416	0.936431	1.5774	2.54983	0.0374759	0.666283	0.778074	0.662884	0	0	0.0739959	3.33774	1.93632	2.25204	2.18551	2.87263	0.281078	2.28692	2.06989	3.40389	0.758347	1.34386	3.35597	2.20546	3.84012
ABI1		NM_001178122	0.00604009	27035524	27150016		NP_001171593.1	422		chr10		0	0.0264287	0	0	0	0	0	0	0	0	0	0	0	0.122901	0	0.0260563	0.0822456	0	0.0333476	0	0	0	0	0	0	0	0	0.0534396	0.153642	0	0	0.0646788	0.0789041	0	0	0	0	0.0681344
ABI1		NM_001178120	0.00190973	27035524	27150016		NP_001171591.1	451		chr10		0	0	0	0	0	0	0	0	0	0.0333554	0	0	0	0	0	0	0	0.707883	0	0	0	0	0	0	0	0	0	0	0	0	0	0	0	0	0	0	0	0
ABI1		NM_001012751	0.0899008	27035524	27150016		NP_001012769.1	452		chr10		0.126362	0.0509085	0	0.95428	0.162205	0.195759	0	0	0.882468	0	0.273288	0.342851	0.111113	0.243715	0.565013	0.471285	0	0	2.05262	1.47147	1.44186	1.17145	1.68025	0.586454	0.428737	0.451946	0.275165	0.544195	0.275787	0.0419091	0	0	0.147826	1.52143	0.0817019	0.177734	0	0
ABI1		NM_001178119	0.0344369	27035524	27150016		NP_001171590.1	480		chr10		0	0	0.122703	0	0	0.0980376	0.448603	0.220731	0	0.711815	0.317846	0	0	0	0.0769392	0	0	0.412418	0	0	0	0	0	0	0.335526	0.588411	0	0	0.361994	0	0.234864	0.195195	0	0	0.122232	0.036707	0.318076	0.367621
ABI1		NM_001012750	0.0038903	27035524	27150016		NP_001012768.1	481		chr10		0	0	0.0687958	0	0	0	0	0	0.28505	0.172333	0	0	0	0	0	0	0	0	0	0	0	0	0	0	0	0	0	0	0	0	0	0	0	0	0	0	0	0
ABI1		NM_005470	0.00288782	27035524	27150016		NP_005461.2	508		chr10		0	0	0	0	0	0	0	0	0	0.0579814	0	0.0801973	0.0537296	0	0	0.0236923	0	0	0	0	0	0	0	0.193998	0	0.0295971	0	0.0371114	0.102708	0	0	0	0	0	0	0	0	0
ABI1		NM_001178116	0.00199465	27035524	27150016		NP_001171587.1	496		chr10		0	0	0	0	0.0265874	0	0	0	0	0	0	0	0	0.0192274	0	0	0	0	0	0	0	0.0327288	0	0	0	0	0.0648968	0	0	0.0778391	0	0	0	0.0686802	0	0.0350837	0	0
ABI2		NM_001282926	0.0533037	204192961	204296896		NP_001269855.1	507		chr2		0.396117	0	0.1121	0.311258	0.235732	0	0	0.203028	0.789401	0.19531	0	0.514904	0	0.295006	0.0726138	0.070123	0.547193	0	0	0	0	0.619741	0.338575	0	0.139585	0.0559809	0.00544014	0	0.115396	0.0268693	0.384545	0.0912874	0.0424865	0.159917	0.719393	0.148624	0.0559988	0
ABI2		NM_005759	0.721951	204192961	204296896		NP_005750.4	475		chr2		2.62599	3.88617	1.77296	1.06446	2.41267	4.32567	5.31716	5.46361	4.58754	4.19779	5.52358	0.95531	2.24551	4.63604	4.59197	3.76852	3.77431	0.611351	6.95755	0.481241	1.05564	3.36703	0	0.558195	4.29592	3.08181	1.02922	2.78803	3.58889	1.81658	4.62373	3.58926	3.09059	1.25712	1.77153	4.86476	4.54452	2.55429
ABI2		NM_001282932	0.0267892	204192961	204296896		NP_001269861.1	390		chr2		0.117805	0.0644608	0.108396	0.250792	0.0105292	0.0648642	0	0.0421864	0	0.113882	0.13407	0.0605255	0.190272	0.116563	0	0.033152	0	0	0.0260703	0.159817	0	0.256707	0.1609	0	0.0285022	0.0328665	0	0.153989	0.0881622	0.0646953	0.112841	0.157473	0	0.160238	0	0.127957	0	0
ABI2		NM_001282925	0.00354911	204192961	204296896		NP_001269854.1	513		chr2		0	0	0	0	0	0	0.0364607	0.0721115	0	0.0200351	0.0370138	0	0	0	0	0.100623	0	0	0	0	0	0	0	0	0	0	0.0914587	0	0.0249192	0	0	0	0.0356026	0	0	0	0.0506869	0
ABI2		NM_001282927	0.194407	204231606	204296896		NP_001269856.1	401		chr2		0.902118	5.56261	0	0	0.0900559	0.205462	3.79191	0.70792	2.11258	0.756567	1.403	0	0.0653836	2.35623	1.27079	0.616349	0.356458	5.25491	7.71454	0.230768	0.0520367	0.510889	0.30244	0	0.89819	0.841007	1.10043	0.750572	0.724837	0.371394	0.780969	1.21306	1.73412	0.118096	0.0439908	0.614404	1.95037	0.71362
ABI3		NM_001135186	0.631162	47287588	47300587		NP_001128658.1	360		chr17		0	0.032309	0.0613659	0	0.0293164	0	0.0305172	0	0.0991783	0	0	0	0	0.0554673	0	0	0	0	0	0	0	0	0.233128	0	0	0	0.0670596	0.0287988	0.0358711	0.0587735	0	0	0	0.112865	0.0339193	0	0	0
ABI3		NM_016428	0.368838	47287588	47300587		NP_057512.1	366		chr17		0	0	0	0	0	0	0	0	0	0.0523853	0	0	0	0	0	0	0	0	12.2895	0.547008	0	3.96002	0	0	0	0	0	0	0	0	0	0	0	0	0	0	0.28367	0.140245
ABI3BP		NM_015429	1	100468178	100712334		NP_056244.2	1075		chr3		0.0397114	0.230273	2.76429	6.60572	0.0470897	0.0467505	0.176234	0.823891	7.1097	9.70494	0.401625	0.0457509	0	0.0860019	0.0451408	0.0393426	0.038141	0.028844	0.0324159	0.058337	0	0.139695	0	0	0.157034	0.0698037	0.0516735	0.0631802	0.0237703	0.0426952	0	0.0976626	0.0193247	0.125923	0.0358027	0.028515	0.105422	0.213152
ABL1		NM_007313	0.311775	133589267	133763062		NP_009297.2	1149		chr9		1.99746	0.661411	1.17433	1.23056	4.34842	0.0514391	1.41934	3.00805	0.993308	3.06107	3.44183	1.73545	2.21538	2.24282	2.31325	1.76703	2.62481	0.084317	1.50044	0.877991	1.17411	1.78038	1.08077	1.4266	3.36088	3.40269	1.01051	2.25444	1.41612	0.7834	1.28142	1.40614	2.91482	0.655891	0.230915	3.22914	2.58774	0.932845
ABL1		NM_005157	0.688225	133710641	133763062		NP_005148.2	1130		chr9		4.13091	0.019531	5.76371	26.6267	0.638936	3.36263	7.03547	25.3067	7.55899	17.11	8.47395	0.99874	4.18583	2.31861	4.84722	1.02046	1.0753	0.0333171	10.7015	0.732486	15.3188	3.40456	0.388952	1.16945	12.7064	2.6404	4.86476	4.76421	2.58503	3.92367	2.73294	4.98348	5.84817	2.1041	3.0708	5.9671	5.52106	5.87052
ABL2		NM_001168239	0.465747	179068461	179112224		NP_001161711.1	1043		chr1		0.53038	4.22544	1.55365	6.98624	1.09509	1.24396	2.44856	3.80044	1.99449	2.43881	2.9123	0.153211	0.334767	1.83534	0.117527	0.337409	0.337493	0.947449	1.80967	0.513461	0.0221075	0.766983	0.662227	0.35762	2.14263	4.83098	2.705	3.83342	1.58269	0.725577	3.10714	2.54819	2.6719	1.22682	0.178937	1.16623	3.63394	3.39203
ABL2		NM_005158	0.275656	179068461	179112224		NP_005149.4	1167		chr1		0.885821	0.227303	0.544992	2.23562	0.565968	0.437868	0.86723	2.96566	0.305082	1.96325	2.22687	0	0.566108	0.313673	0.7986	0	0.192686	0	0	0.123307	0.332695	0	0	0.510121	1.74021	5.12676	2.20649	4.91893	2.54206	1.67495	0.715617	0.457709	2.30318	0	0.230138	1.77805	2.99552	2.4982
ABL2		NM_001136000	0.0400746	179068461	179112224		NP_001129472.1	1064		chr1		0	1.35687	0.0395025	0	0	0	0	0.118896	0	0	0	0	0.051585	0.0237869	0	0	0.0386058	0	0	0.434549	0.354892	0	0	0	0.563474	0	0	0	0	1.17528	0	0	0	0	0.0755823	0	0	0.0145837
ABL2		NM_001168236	0.0990309	179068461	179198819		NP_001161708.1	1161		chr1		0.51618	0	0	1.026	0.319674	0.40527	0.00938975	0	0.728793	0.0062499	0.0660716	0.205555	0.131155	0.110114	0.180115	0.384571	0.176071	0	0.113684	0.0122248	0.442539	0.116879	0.481538	0	0.107391	0.0905234	0.320576	0	0	0.435434	0.620272	0.157964	0	0.382469	0.265033	0.605334	0	0
ABL2		NM_001168238	0.0246214	179068461	179198819		NP_001161710.1	1058		chr1		0	0	0	0	0	0	0	0	0	0	0	0.0730168	0	0.00854079	0	0	0.0361083	0	0	0.0404535	0.46907	0	0	0	0.0325919	0	0	0	0	0.295258	0	0	0	0	0.0890872	0	0	0
ABL2		NM_007314	0.041439	179068461	179198819		NP_009298.1	1182		chr1		0	0	0.188689	0	0.154359	0.919996	0.491975	0.11715	0	0.320272	0.32143	0	0.0221645	0.156187	0	0	0.0224571	0	0.0421203	0.0106098	0	0.319104	0	0.18128	0.129085	0	0	0	0	0	0.21017	0.373745	0	0	0.116677	0.114462	0.0853453	0.0757421
ABL2		NM_001168237	0.00305769	179068461	179198819		NP_001161709.1	1079		chr1		0	0	0.0142197	0	0	0	0	0	0	0	0	0	0	0.0123564	0	0	0	0	0	0.0347929	0	0	0	0	0.0396693	0	0	0	0	0	0	0	0	0	0.0385552	0	0	0
ABL2		NM_001136001	0.0503736	179079715	179198819		NP_001129473.1	542		chr1		0	0.050888	0.0733492	0	0	0	0	0.80699	0	0	0.317524	0	0.0961709	0.0803937	0.305967	0	0	0.0452583	0	0	0.259559	0	0	0.122532	0.076859	0.100978	0	1.6696	0.573881	0.309816	0.0738727	0.0596741	0.589332	0	0	0.0826637	0.769082	0.606283
ABLIM1		NM_006720	0.604134	116190868	116286685		NP_006711.3	455		chr10		1.2491	2.89439	0.0198085	0.800221	2.42526	0.166746	0.65592	1.25634	1.86398	0.143533	2.33356	12.4702	9.73141	14.2097	5.12285	7.7205	9.24113	0.833179	2.70703	5.4155	0	0.0631804	4.71552	2.37202	0.0244098	0.12318	0.0310138	0.46647	0	4.89171	0.524846	0.953474	0.184742	0.371312	2.32618	8.58566	1.26703	2.48231
ABLIM1		NM_002313	0.197464	116190868	116418058		NP_002304.3	778		chr10		0.400768	0	0.0276742	0.809497	0.754232	0	0.0274868	0.365383	0.210866	0.105161	0	0.157376	2.53106	1.09997	1.04762	1.37964	1.23001	0.0293845	0.58538	0.0916081	0	0.278293	0.135064	1.55715	0	0.400897	0.122073	1.01874	0.0457717	0.332329	0.250574	0	0.027328	0.0474359	0	0.970253	0	1.56861
ABLIM1		NM_001003407	0.198199	116190868	116444414		NP_001003407.1	718		chr10		0	0.14452	0.0362635	0	0	0.320016	1.24469	1.91077	0	0.0167204	0.808991	2.70347	0.858741	1.35602	1.32212	0.410091	0	0	0	0	0.0873968	0	0.287013	0	0	0.0741656	0.209399	0.0448862	0	0.285524	0.0632555	0.242587	1.04394	0.112577	0.830778	3.74922	0.531042	1.15302
ABLIM1		NM_001003408	0.000203501	116190868	116444414		NP_001003408.1	746		chr10		0	0	0	0	0	0	0	0	0	0	0	0	0	0	0	0	0	0	0	0	0	0	0	0	0	0	0	0	0	0	0	0	0	0	0	0	0	0
ABLIM2		NM_001286688	0.204856	7967036	8073743		NP_001273617.1	346		chr4		0	0	0.104432	0	0	0.0399908	0.0419902	0.0215368	0	0.0330012	0.0195467	0.132912	0	0.0638928	0	0.0554963	0	0.0808716	0	0	0	0.089936	0.174787	0	0	0	0.0965848	0.0525596	0	0.103475	0.0306159	0	0	0	0	0	0.138779	0
ABLIM2		NM_032432	0.247222	7967036	8160559		NP_115808.3	521		chr4		0.45211	0.0504095	0	0	0	0	0	0	0.0557164	0	0	0.199743	0	0.255997	0	0	0	0.124412	0	0.0626675	0	0	0.101402	0	0.0528467	0.0365227	0.044237	0	0	0	0	0	0	0	0.0699685	0.672616	0.0592297	0
ABLIM2		NM_001130087	0.0429936	7967036	8160559		NP_001123559.1	531		chr4		0	0	0	0	0	0	0	0	0	0	0	0	0	0.133915	0.0646599	0	0.0607178	0	0	0	0	0	0	0	0	0	0	0	0	0	0	0	0	0	0	0.0837498	0	0
ABLIM2		NM_001130086	0.0481722	7967036	8160559		NP_001123558.1	559		chr4		0	0	0	0	0	0	0	0	0	0	0	0	0.0748286	0	0	0	0	0	0.0478799	0	0	0	0	0	0	0	0	0	0.0384304	0	0	0	0	0	0	0.138497	0	0
ABLIM2		NM_001130085	0.0688894	7967036	8160559		NP_001123557.1	572		chr4		0	0	0	0	0	0	0	0	0.0660981	0	0	0	0.129065	0	0	0	0	0	0	0	0	0.0666362	0	0	0	0	0	0	0	0	0	0	0	0	0	0.044548	0	0
ABLIM2		NM_001130083	0.0376793	7967036	8160559		NP_001123555.1	645		chr4		0	0	0	0	0.0206103	0	0	0	0	0.0145258	0	0	0	0.0277791	0	0	0	0	0	0	0	0.0291985	0	0.0278831	0	0	0.0476365	0	0	0.0446131	0	0	0	0	0	0.0719948	0	0
ABLIM2		NM_001130088	0.350188	8008747	8160559		NP_001123560.1	470		chr4		0.251028	0	0.0643969	0	0.0225156	0.0308909	0	0	0.121973	0.0640446	0.0257432	0	0.343006	0.126524	0.21908	0.0582877	0	0	0.0712906	0	0	0.229416	0.144748	0.0379622	0	0.029479	0.15965	0	0	0.13816	0	0	0	0.0654506	0.0794833	0.606722	0	0
ABLIM3		NM_001301028	0.338745	148521045	148640001		NP_001287957.1	544		chr5		0.278105	0.346903	0.545868	0	0.388291	0	11.9828	2.0971	0	1.48083	0.794098	0	0.0974386	0.741838	0	1.35802	0.0627029	0	0	0	0	0.0996989	0	0	0.0497824	0.615749	0.535627	3.92818	2.95698	0	0.241641	1.75669	0.763985	0	0.300624	0.147663	4.63584	3.62182
ABLIM3		NM_001301027	0.158444	148521045	148640001		NP_001287956.1	580		chr5		0	0.517285	1.01687	0	0	0.0397681	0.244616	0.218629	0.168779	0.895592	0.252842	0.277733	0	0.692016	0	0.761974	0	0	0	0	0	0	0.0964304	0	0	0.550485	1.90458	0.201255	1.03141	0.0265407	0.102493	0.571079	0.340419	0.600096	0	0	0.338164	0.963232
ABLIM3		NM_001301015	0.0195393	148521045	148640001		NP_001287944.1	683		chr5		0	0	0	0	0	0	0	0	0	0	0	0	0	0	0	0	0	0	0	0	0	0.0263739	0	0	0	0	0.0261602	0	0	0.0794983	0	0	0	0	0	0	0	0
ABLIM3		NM_014945	0.169619	148521045	148640001		NP_055760.1	683		chr5		0.182658	0.20973	0	0	0.118863	0	1.30173	0.827013	0	0.517882	0.696453	0.138406	0	0.495499	0	0.724974	0.0445295	0	0	0.0426612	0	0	0	0	0.110825	0.357256	0.7349	0.781142	0.673007	0	0.249269	0.793525	0.720148	0.119297	0.0490452	0.152808	0.9146	0.989678
ABLIM3		NM_001301018	0.313654	148521571	148640001		NP_001287947.1	650		chr5		0.401067	1.0645	1.6845	0	0.295863	0	11.715	1.85247	0.0648568	2.10758	0.364826	0.167923	0	0.977099	0.0308069	0.973457	0	0.178151	0.0230797	0	0	0	0	0	0	1.12452	0.990119	4.27976	2.60452	0.0379088	0.272045	0.686688	0.815052	0.171861	0.274831	0	5.69484	3.60274
ABO		NM_020469	1	136130562	136150630		NP_065202.2	354		chr9		0.478947	0.0805419	0.197721	0	0.419805	0.0827445	0.327493	0.0348881	0.255019	0.233874	0.0784032	16.842	1.98995	0.442249	9.40228	2.08811	0.74939	0.571431	0.374429	0.676827	3.22247	0.702859	0.8518	0.234771	0.147937	0.0852981	0.398385	0.0848552	0.10361	0.230598	0	0	0.0660921	0.366116	0.128616	0	0.119908	0
ABR		NM_001256847	0.238531	906757	935081		NP_001243776.1	310		chr17		0	0.0702738	3.62134	6.60534	1.46204	0.427241	9.41656	0.47773	8.73996	2.85827	0.639831	0.955699	0.175703	0.0416554	0.401507	3.14341	0.677628	0.329104	9.05895	0.742114	0	0.504292	1.02152	0.205758	1.33043	2.14438	26.0332	0.0431683	6.25778	3.62258	4.91155	7.92334	0.118327	6.57369	4.29107	0.0556864	0.539642	0.952694
ABR		NM_001282149	0.0145975	906757	982386		NP_001269078.1	641		chr17		0.0823529	0	0	0	0	0.0694226	0.065816	0.168863	0.168921	0.155746	0.0257259	0.230956	0.146237	0.0458342	0.101375	0.162121	0	0	0.140045	0	0	0.238913	0	0	0.186812	0.0431304	0.887388	0.063803	0.0767671	0.134249	0.0837081	0.109704	0.430789	0	0	0.0490006	0.0278056	0.127041
ABR		NM_001092	0.602498	906757	1012340		NP_001083.2	822		chr17		5.47305	1.47809	0.883958	0.708015	3.27382	3.22212	13.8227	11.7886	1.15059	7.81652	15.1598	10.2091	10.8149	4.29657	3.14654	5.30489	6.04133	0.48735	1.42499	3.03326	0	0.791892	0	2.35547	7.31613	7.19004	19.3269	0.514617	12.4355	1.52462	4.25241	6.78794	24.5528	1.41917	5.26076	13.8589	9.90028	11.1281
ABR		NM_021962	0.112397	906757	1083268		NP_068781.2	859		chr17		1.53455	0.046733	0.991831	1.17615	0.159346	0.52155	0.768324	2.08498	1.34528	1.30643	1.35707	0.0502458	1.72359	1.24376	1.00553	0.0839001	0.0622794	0	0.0925403	0.436221	0.0644394	0.203725	0.214453	0.46147	1.62183	1.34243	7.94822	0.840537	4.51243	0.337275	5.73739	0.810881	0.306137	0.135485	0.37521	0.499674	0.380536	2.16915
ABR		NM_001159746	0.031976	906757	1090616		NP_001153218.1	813		chr17		0.273967	0	0.140881	0	0.0129569	0	0.0345335	0.0377653	0.111467	0.036457	0.113526	0.0555247	0.161181	0.033022	0.174459	0.0523862	0.0821485	0	0	0.0734772	0	0.118986	0.250601	0.0354667	0.0498926	0.696616	3.96918	0.371156	3.71994	1.39905	3.00874	2.41904	4.62516	1.17293	0	0.0575359	0.140083	0.17584
ABRA		NM_139166	1	107771710	107782472		NP_631905.1	381		chr8		0.140583	0.0391484	0.144432	0	0.0468683	0	0	0.0376353	0	0.0780287	0	0.0238491	0.0495136	0.119246	0.0569811	0.151517	0.0602649	0.178839	0.0213258	0	0	0.0677965	0.148597	0	0	0	0.148366	0.0266937	0	0.0224486	0	0	0	0.150833	0	0.0578193	0.0260501	0.0451976
ABRACL		NM_021243	1	139349818	139364439		NP_067066.1	81		chr6		6.40385	34.0463	2.12491	10.1788	6.52075	6.49258	8.7792	7.67411	4.21764	6.31853	13.2973	7.60083	13.6126	20.4216	4.0244	7.53292	28.9147	41.9327	75.5291	28.6866	0.615071	29.8209	3.638	4.92904	19.3662	11.4575	2.82215	3.62872	7.59997	2.39096	7.89696	8.03941	6.58522	3.90878	2.76647	0.959369	6.95506	6.80329
ABT1		NM_013375	1	26597170	26600277		NP_037507.1	272		chr6		7.52076	4.33861	3.61038	7.00484	5.92582	2.19424	8.39289	5.96334	5.3342	3.4986	5.25122	5.43608	6.53942	10.5736	4.47134	4.64944	3.47204	1.35695	24.9079	6.77888	9.26514	7.64705	7.10692	5.33493	8.26172	4.94225	4.35891	5.94528	4.3603	6.31208	6.60903	6.25556	6.44294	3.36626	2.17662	2.49496	8.21801	4.70812
ABTB1		NM_032548	0.0677734	127391780	127399769		NP_115937.1	336		chr3		0	0	1.68573	0	0	0	0	0.55618	0	0.0945511	0	0	0	0.489739	0	0	0	0	0.189779	0	0	0.0644541	0	0	0	0.720597	0	0.368879	0	0.0856626	0	0	0.482376	0.762117	0	0.192934	0	1.70755
ABTB1		NR_033429	0.521621	127391780	127399769		na	na		chr3		0.783923	0.496336	0.670608	1.0254	0.507591	0.702897	1.55405	0	4.85061	0.694634	0.590893	0.576879	0.15809	1.8606	0.71081	1.23946	2.46915	0.120576	2.28647	0.676897	0	1.53451	2.56196	1.04101	1.08874	0.895778	4.31437	1.4409	1.20333	2.00262	0.355388	0	3.26459	1.57186	0.925792	0.469568	0.527113	0
ABTB1		NM_172027	0.410606	127391780	127399769		NP_742024.1	478		chr3		0	0	1.22316	0	0.443176	0	0.0799956	2.04018	0.413274	1.30384	0	0.478332	1.21922	0.370276	1.15069	0.290452	0.370836	0	3.42454	0	0	0.171625	0	0	0.315273	2.34171	0.0624952	2.60831	3.10328	0	1.89974	2.65511	1.81009	0	0.428427	0.446108	1.28104	0.962906
ABTB2		NM_145804	1	34172533	34379555		NP_665803.2	1025		chr11		1.41065	0.746904	0.22506	1.18683	1.95661	0.793958	2.03229	1.11485	1.00423	0.790025	2.76576	2.00211	1.17307	1.05043	1.19611	2.62767	1.49739	0.47931	0.0759307	0.833773	0.112603	0.338845	0.236611	0.280668	0.540351	2.07531	1.68892	7.27076	4.7129	1.19951	1.13358	3.30816	4.21988	1.2156	1.17779	4.99318	3.98402	1.98494
ACAA1		NR_024024	0.15503	38164200	38178733		na	na		chr3		1.05246	0	1.4283	3.28371	0.830618	0.23158	1.70315	0.955078	5.5969	1.98261	1.30835	0.663051	2.15562	0.787405	2.72596	2.43956	1.87008	0	9.90105	0.0543789	1.83558	0.665008	1.60666	1.20747	0.456309	1.08826	5.40023	1.31581	2.08269	0.718309	1.84836	1.96648	1.38614	1.31531	0	1.13904	1.89897	1.92812
ACAA1		NM_001130410	0.215053	38164200	38178733		NP_001123882.1	331		chr3		3.83581	4.78968	0.267062	0	4.66298	1.90563	0.916676	0.270183	0.632278	0.480689	0.761374	0.835649	2.22461	4.83169	1.31602	1.89504	2.03413	2.56456	6.21602	19.072	0.53837	16.3429	1.41931	0.321968	0.383025	0.504591	0.964929	0.679398	0.925665	3.17054	0.457125	0.754658	0	0.51307	1.75551	0.657665	0.578068	1.42672
ACAA1		NM_001607	0.629917	38164200	38178733		NP_001598.1	424		chr3		7.20973	0.41767	3.56366	1.97685	5.37617	1.95564	16.3174	3.00467	5.61883	7.91236	6.41098	7.11665	9.29371	8.95588	8.64872	10.7739	10.9224	0	31.3033	1.10856	3.23076	1.55338	0.661188	3.74751	4.72893	8.60927	11.9145	5.81174	10.1362	7.83083	12.1231	16.6814	7.06343	0.66232	4.30283	5.1223	8.38401	11.215
ACAA2		NM_006111	1	47309873	47340251		NP_006102.2	397		chr18		33.07	9.41083	7.98004	6.80649	6.25369	2.83589	7.69594	8.14123	1.9074	11.3317	3.18711	7.09358	20.0509	7.17912	14.001	15.1189	2.53825	30.0481	10.8479	16.6346	1.88096	3.01653	12.6396	9.47051	6.00182	6.69647	4.80194	6.22343	6.29388	10.7077	16.97	9.11025	11.4398	4.76014	5.3475	13.1575	4.51504	2.02439
ACACA		NM_198837	0.0125189	35441926	35656692		NP_942134.1	2288		chr17		0.308377	0	0	0	0	0	0.0610229	0	0.208571	0	0	0	0.0715822	0.0176115	0	0	0	0	0.0239136	0	0	0	0.0739516	0	0	0	0	0.0234176	0	0.0273756	0.0136465	0	0	0.0351858	0	0	0	0
ACACA		NM_198838	0.0243407	35441926	35656692		NP_942135.1	2268		chr17		0	0.138381	0.0642871	0	0.357472	0.0197345	0.0943825	0.0157657	0	0.0564958	0.132629	0	0	0.494799	0.476523	0.381	0	0.29425	0.0184368	0	0.239065	0.279733	0	0	0.0644507	0.271229	0.0883655	0.0660663	0.0176307	0.0456048	0	0.0813431	0.184685	0	0.180216	0.190814	0.484209	0
ACACA		NM_198836	0.660453	35441926	35716059		NP_942133.1	2346		chr17		2.1511	0.647091	1.37878	2.44441	3.33489	0.608137	8.01828	4.39687	1.04006	1.70495	5.7599	2.72791	4.48965	6.31821	6.78862	6.7491	1.72408	0.854288	0.361002	3.56779	5.46953	3.45848	0	1.86827	2.52236	1.66085	2.49717	3.84642	2.7438	1.86128	2.36798	6.10411	2.57617	0.284505	2.22709	6.89189	11.3154	5.69401
ACACA		NM_198834	0.288355	35441926	35766902		NP_942131.1	2383		chr17		1.15567	1.7261	0.801278	0.713051	1.8346	1.32556	1.62847	0.569324	0.738233	1.63113	0.919062	0.17999	0.760915	1.13989	0.610487	2.04264	0.776006	0.779478	3.59347	1.25677	0.481866	1.6955	0.882365	0.519956	0.655505	1.05901	0.979761	0.69475	0.345199	0.968031	1.8435	1.02823	1.00286	0.417489	1.02909	1.72676	1.59992	0.890994
ACACA		NM_198839	0.0143326	35441926	35766902		NP_942136.1	2346		chr17		0	0.0222587	0.114603	0.0548046	0.062215	0	0	0.090353	0.086416	0.0402409	0.0453539	0.0279142	0.114855	0.0337495	0.0617676	0.0178188	0	0.0197446	0.0112708	0.0232347	0.0890114	0.0530684	0.096035	0.0529072	0.0875303	0.0791365	0.0828549	0.0566349	0.0443758	0.0476075	0.0213816	0.091489	0	0.0345242	0.054772	0.0620013	0.107092	0.0818712
ACACB		NM_001093	1	109577201	109706030		NP_001084.3	2458		chr12		1.37145	0.0737114	0.0849505	0.0455964	0.206177	0.138165	0.321508	0.367827	0.235452	0.459246	0.577153	0.85137	0.194206	0.534356	0.825692	0.14163	0.69099	0.0564947	0.231043	0.181779	0.033534	0.523112	0.235536	0.0901203	0.0521037	1.78363	0.817254	0.237425	1.34235	0.918301	1.36975	0.72601	0.825199	0.232578	0.321291	0.500013	0.146591	0.336348
ACAD10		NM_025247	0.858472	112123856	112194911		NP_079523.3	1059		chr12		1.99511	0.126043	0.317158	1.4822	3.35797	0.381889	1.42594	1.32477	0.942912	1.4782	1.22586	1.37909	0.641944	1.20468	0.797882	0.610402	1.3851	0.111957	2.82552	0.630949	0.798563	0.706513	0.823554	0.112848	1.045	2.17382	1.33822	0.966675	1.00472	2.44818	2.20923	1.66873	0.940514	0.755947	0.340349	0.833821	1.53561	1.7468
ACAD10		NM_001136538	0.141528	112123856	112194911		NP_001130010.1	1090		chr12		0.153281	0	0.0969709	0	0.163681	0	0.239649	0	0	0.103187	0.137888	0	0.606665	0.0320042	0.325798	0.166372	0.44621	0	0	0	0.0728723	0.1277	0.125623	0.597284	0	0.0582604	0.0470044	0.0571152	0.348161	0.0373239	0.549451	0.306579	0.198948	0	0.443381	0.425209	0.0853749	0
ACAD11		NM_032169	1	132276981	132378975		NP_115545.3	780		chr3		0.507857	0.708929	1.17005	2.48267	1.69398	0.419334	0.950862	1.23047	1.15281	1.6937	0.923985	0.42283	0.383691	1.67187	0.600282	0.457956	2.21058	1.81002	3.04437	0.757844	0.368071	1.07408	1.59373	0.436962	0.945754	1.18014	1.40453	0.954961	1.25481	1.22493	1.85623	3.89415	0.941466	0.600456	0.363745	0.692095	0.90104	0.847269
ACAD8		NM_014384	1	134123433	134135746		NP_055199.1	415		chr11		3.16504	4.7746	0.705421	0.914298	6.79141	1.00005	3.14792	0.995943	2.55252	3.43757	2.3164	1.16675	2.49549	4.72384	2.30281	3.60139	3.64724	3.32663	14.9328	1.72368	1.4612	3.13117	1.49248	0.714057	1.26457	1.66489	2.76511	1.17614	1.75553	2.02569	1.82857	2.55489	2.51385	1.24631	0.506371	2.63019	2.85533	1.60733
ACAD9		NM_014049	0.794811	128598332	128631957		NP_054768.2	621		chr3		4.76459	1.12511	2.52239	3.52567	6.40174	1.84923	7.05863	7.33702	2.52846	4.8217	3.90657	4.91891	5.44788	5.61085	7.49506	7.30525	2.24694	0.521066	17.1417	6.49255	2.34722	4.56932	1.46369	1.46138	3.07662	3.81655	5.64522	4.09788	5.61351	4.49869	8.752	10.5698	7.47843	1.55278	2.08903	4.48285	5.66732	3.27982
ACAD9		NR_033426	0.205189	128598332	128631957		na	na		chr3		1.71246	0	0.509056	1.79248	1.73061	0.685545	0.37526	1.49665	0.775324	1.38316	0.965326	1.55228	1.15879	1.04205	1.12259	1.54297	1.31972	0.224051	0.818374	0.522956	0.570678	1.65566	0.557085	1.73995	0.486959	1.24318	1.74644	1.21984	1.15734	0.565799	1.57787	1.41752	1.81717	0.794479	0.158697	0.624876	1.33562	1.44791
ACADL		NM_001608	1	211052715	211090215		NP_001599.1	430		chr2		0.0520759	0	0	0	0	0	0	0.069009	0.0632006	0	0.0869289	0	0.0485253	0.0190903	0	0	0	0.183037	0	0	0	0.0604267	0	0	0	0	0.0299153	0	0	0.0231157	0	0.030387	0	0.111817	0.102384	0.246667	0	0
ACADM		NM_001286044	0.166831	76190031	76229363		NP_001272973.1	232		chr1		0.221697	0	0.778572	2.61589	0.688126	0	0.726656	0	1.10008	0	0.0484995	0.219006	0	0	0	0	0	8.96016	0.0822782	6.78335	0	5.81454	0.911314	0	0	0	0.956422	0	0.0747922	0.506498	0	0	0	1.44004	0	0	0	0
ACADM		NM_001286042	0.155589	76190031	76229363		NP_001272971.1	385		chr1		0	4.4651	0.246631	0.180876	0.686008	1.29211	1.14166	0.388126	0.548106	1.17132	0.216747	0.577125	0	1.24563	0.612649	0.389642	1.76557	4.53734	9.90429	0.163606	1.01241	0.577673	0.167359	0	0.356127	0.212709	0.636806	0	0.631807	0	1.02741	0.337098	0	0.820464	0.459798	0.669133	0.12754	0
ACADM		NM_001127328	0.00818081	76190031	76229363		NP_001120800.1	425		chr1		0	0	0	0	0	0	0.260076	0	0	0	0.225885	0	0	0.221808	0	0	0	0	0.251493	0	0	0	0	0	0	0	0	0	0.160715	0.0383167	0	0	0	0	0	0.122976	0	0
ACADM		NM_000016	0.662732	76190031	76229363		NP_000007.1	421		chr1		1.00706	14.7395	0.247115	0.828328	1.22648	0.277904	0.71033	3.1353	1.59457	2.39162	6.09498	0.981176	3.06186	6.27868	1.78693	1.71592	6.1749	3.05514	21.4699	0.487766	3.81569	1.32323	0.359904	0.817547	2.98741	4.53483	0.265932	2.10563	2.97273	0.579338	7.72177	2.10396	2.77321	0.265857	0.560702	4.091	1.3229	2.49549
ACADM		NM_001286043	0.00666695	76190031	76229363		NP_001272972.1	454		chr1		0	0.0507111	0.0853899	0	0	0	0	0	0	0.0367541	0.0553511	0	0.0714697	0	0.243873	0	0	0	0.0384496	0.104032	0	0	0	0.0774436	0	0.0905385	0.0366464	0	0	0	0	0	0	0	0	0	0	0
ACADS		NM_000017	0.95747	121163540	121177811		NP_000008.1	412		chr12		1.02312	0.0653407	0.780426	1.03273	2.27077	0.21557	1.00127	1.08372	2.59844	2.09409	2.31624	7.55846	2.15126	2.92304	2.11274	1.35464	3.51187	0.0670416	1.67917	1.01283	2.18026	1.92126	0.18527	0.194923	1.07405	3.70263	2.67953	1.12843	2.60151	1.97113	6.98367	4.86802	3.21539	0.948764	1.08136	1.67872	1.41592	1.53459
ACADS		NM_001302554	0.0425299	121163540	121177811		NP_001289483.1	408		chr12		0	0	0	0	0	0	0.0679539	0	0	0	0	0	0	0.416716	0	0	0	0	0	0	0	0	0.417901	0	0	0	1.23741	0	0	0.223001	0	0.180696	0	0.638638	0.507195	0	0	0
ACADSB		NM_001609	1	124768428	124817806		NP_001600.1	432		chr10		0.935211	0.942347	0.257334	0.0954762	1.0753	0.44889	0.555279	0.294718	1.33076	0.579564	1.46817	0.349539	0.890011	2.35479	1.05669	0.129093	0.632387	1.43655	2.25635	0.658923	0.227735	0.702837	0.298349	0.0703397	0.288844	1.60917	0.523455	0.960339	0.809794	0.709711	0.866589	0.89243	2.46653	1.2366	0.676295	1.31989	0.374084	0.970878
ACADVL		NM_001270447	0.659113	7120443	7128586		NP_001257376.1	678		chr17		4.41929	0.55248	9.48655	3.69965	10.8607	1.51868	14.4573	14.8619	3.31672	21.1143	22.4701	14.1679	25.8885	7.8064	14.0405	7.35907	7.67061	0.192391	41.0822	2.51136	7.72385	0.929134	0	9.21353	7.64191	21.0339	8.66628	7.16363	10.313	3.08605	21.0368	21.3285	25.0639	0	4.23665	19.3955	15.9931	8.0619
ACADVL		NM_001033859	0.273278	7123149	7128586		NP_001029031.1	633		chr17		3.66142	0	1.73985	10.4325	11.2274	4.8008	8.33432	0.983011	6.41096	4.01131	2.94741	8.74651	3.79254	3.70036	3.61729	6.36148	11.2158	0	4.22062	4.68959	2.05625	3.96386	10.3857	6.08017	1.38013	0.187172	5.90226	0.644158	0.762439	4.12229	3.39709	2.60207	2.10129	3.3968	6.48061	6.91904	2.54299	3.30586
ACADVL		NM_001270448	0.0618103	7123149	7128586		NP_001257377.1	579		chr17		0.10697	0.148445	0.608621	3.82172	0.375206	0.658983	0.166251	0.240901	0.639613	1.09114	0.833829	2.726	0.791893	0.386125	0.819213	1.21328	1.21672	0.0971856	0.13986	0	0	0.521841	0	0.653469	0	0.0560402	0.216467	0.348456	0.622542	0.0812343	1.36622	0.176687	0.861628	1.27986	0.900978	2.21396	0.756934	0.161817
ACADVL		NM_000018	0.00579926	7123149	7128586		NP_000009.1	655		chr17		0.234388	0	0	0	0	0	0	0	0	0	0	0	0	0	0	0	0	0	0	0	0	0	0	0	0	0	0	0	0	0	0	0	0	0	0	0	0	0
ACAN		NM_001135	0.455106	89346673	89418585		NP_001126.3	2431		chr15		0	0.00831483	0	0	0	0.00888778	0.030597	0.543753	0.0479212	0.0572242	0	0.0367352	0	0.0225315	0	0	0	0.0458322	0.00849015	0.0117558	0	0	0.112216	0.0198542	0.00896891	0.0474583	0	0.0309468	0	0.059867	0	0.0223161	0.0759114	0	0.0163464	0	0.0109381	0
ACAN		NM_013227	0.544894	89346673	89418585		NP_037359.3	2530		chr15		0	0	0.0808141	0.0220666	0.0200195	0	0	2.70107	0.0181918	0.640814	0.016639	0.0146271	0	0	0	0.0182581	0.0153164	0	0	0.0131519	0	0.0698475	0.267112	0	0	0.129322	0.0685052	0.556674	0.45766	0.0446192	0	0.0814011	0.332245	0.247837	0	0.00867435	0	0
ACAP1		NM_014716	1	7239847	7254793		NP_055531.1	740		chr17		0.75665	0.0398293	0.350654	0.332824	0.880341	0.542422	0.482195	0.197512	0.244007	0.39326	0.406555	0.10352	0.382254	0.537651	0.520826	0.234332	0.41981	0.0375598	59.1958	2.9149	0.443837	3.72662	0.371854	0.357567	0.283983	0.317056	0.824752	0.194648	0.52475	0.236404	0.259622	0.267927	0.387199	0.342701	0.466153	0.41893	0.400945	0.203839
ACAP2		NM_012287	1	194995464	195163817		NP_036419.3	778		chr3		2.658	5.61072	1.4615	1.60728	6.21771	0.582556	1.84503	3.25446	2.1004	3.00973	3.7176	2.30952	2.70915	3.64294	1.47117	1.81096	2.57789	2.93451	6.59169	2.21863	1.80813	2.22998	1.30984	0.972702	2.7934	4.34425	2.54611	2.39657	3.74091	1.8822	3.40926	3.53976	4.11652	2.53865	0.717419	2.12596	1.81923	2.34383
ACAP3		NM_030649	1	1227763	1243269		NP_085152.2	834		chr1		1.98712	0.0950748	2.10616	2.66981	3.46257	1.3868	4.33045	6.97033	3.53848	8.9562	4.30997	1.9438	6.81048	1.48925	2.81871	3.42887	2.37037	0.156881	15.1182	0.716062	1.57011	3.44014	3.85234	5.52199	0.959733	2.10126	5.05831	4.29949	4.32739	1.50447	7.03371	5.93303	6.02921	1.63224	1.10116	2.80888	3.43538	4.23738
ACAT1		NM_000019	1	107992257	108018891		NP_000010.1	427		chr11		6.38235	58.1985	6.63988	9.72909	23.042	55.0432	14.9111	5.10623	4.93265	8.24835	10.732	6.14002	8.8801	22.9632	8.85445	8.0139	19.1154	79.4969	26.2831	30.2325	9.84378	9.42453	17.4014	15.97	8.5257	4.65556	9.9767	3.20172	6.15905	10.3055	12.252	15.8948	16.7542	8.80028	5.9493	85.1382	4.66824	8.20795
ACAT2		NM_005891	0.865255	160182988	160200087		NP_005882.2	397		chr6		17.5689	31.3122	12.7486	7.30185	15.7083	8.35616	26.2719	32.4423	2.93657	15.5339	13.369	4.66151	17.2537	17.0134	12.3152	7.65507	15.6391	0	54.463	0.486729	12.8528	4.59965	5.18563	9.36828	11.5897	9.54126	13.4664	9.75849	8.81968	7.69813	17.6016	10.7958	10.7023	2.49276	2.79567	20.6323	27.5741	6.2109
ACAT2		NM_001303253	0.134745	160183510	160200144		NP_001290182.1	426		chr6		1.58252	0	0.704522	0.752824	0.189413	0.673615	0.497408	0.593302	0.212649	1.16824	0.658746	0.170643	0.885605	0.427214	0.404534	0.621018	2.44626	10.3451	1.88388	16.6191	1.17469	17.7136	0.782921	0.811258	0.270975	0.42123	0.496016	0.248622	0.360121	0.0868079	0.259014	0.160031	0.310515	0.719562	1.22491	1.0724	0.683123	0.288387
ACBD3		NM_022735	1	226332379	226374423		NP_073572.2	528		chr1		2.26129	5.64076	3.12042	4.99093	6.04631	2.00166	4.5423	6.62304	4.37541	6.11765	6.32548	3.75986	4.88769	4.84436	3.97499	3.23955	4.31982	3.46928	6.19553	2.80352	3.81393	1.99611	2.39283	2.11312	3.22162	8.14171	2.49576	4.04101	3.22276	2.48399	4.57177	5.31494	4.02623	2.31458	2.3697	3.73469	4.31055	5.88288
ACBD4		NM_001135704	0.0946797	43209966	43221543		na	na		chr17		0	0	0	0	0.340034	0	0	0	0.550188	0.0824945	0	0	0.154019	0.0388223	0	0.0403006	0.483296	0	0.106426	0	0	0.0905804	0.339429	0	0	0.340053	0.0791563	0.0667981	0	0.112931	0.177677	0.141775	0.142262	0.127823	0	0.185755	0	0
ACBD4		NM_001135707	0.154428	43213013	43220326		NP_001129179.1	268		chr17		0.146989	0.0649889	0	0	0.456612	0	0	0.0576954	0.173798	0.052172	0.0518637	0	0.242575	0	0.356059	0.407728	0	0.0604568	0.228528	0	0.257807	0.0889262	0.329338	0.0780528	0.100458	0.229417	0.0366269	0.157805	0	0.130697	0.104469	0	0.177528	0.152106	0.128598	0.246096	0.329611	0.140095
ACBD4		NM_024722	0.30273	43213013	43221543		NP_078998.1	305		chr17		0.603014	0	0.160949	0.732735	0.826887	0.541248	0.126933	0.247145	0.500186	0.420145	0.181815	0	0.732103	0.298815	0.614085	0.605144	0.424056	0	0.465771	0.159921	0	0.257091	0.634527	0.330545	0.092158	0.882375	0.134785	0.472743	0.118339	0.0803414	0.0810413	0.0637606	0.288122	0.397429	0.298105	0.56498	0.474263	0.275264
ACBD4		NM_001135706	0.27518	43213013	43221543		NP_001129178.1	341		chr17		0.373092	0	0	0	1.60267	0	0	0	0	0.151205	0.652202	0	0.176715	0.267774	1.05162	0.915563	0.53532	0	1.45874	0	0	0.291326	0	1.26283	0	0.714099	0	0.618027	0.465687	0.0347698	0.0755432	0.678292	0.780542	0.25988	0.126861	1.03064	0.175089	0.432932
ACBD4		NM_001135705	0.172982	43213013	43221543		NP_001129177.1	305		chr17		0	0	0	0.508883	1.93703	0	0.528061	0	0	0	0	0.707852	0	0.304914	0	0	0.191484	0	1.72754	0	0	0.296267	1.19101	0.164686	0.26779	0	0	0	0	0.753975	0.199637	0.125574	0	0	1.47372	0.271231	0.443506	0
ACBD5		NM_001301254	0.12721	27484142	27529808		NP_001288183.1	348		chr10		0.19669	0	0.299642	0.576701	0.184599	0	0.60957	0	1.38568	0.216579	0.181699	0.319951	0	0.166263	0.596679	0.221307	1.49349	0	0.34406	0.257274	0	0.61089	0.242879	0	0	0.139485	0.914489	0.105732	0	0.163546	0	0.0829173	0.24505	0.880529	0.169187	0.253428	0	0
ACBD5		NM_001301252	0.0053998	27484142	27529808		NP_001288181.1	416		chr10		0	0	0	0	0	0.153991	0	0	0	0	0	0.0856629	0	0	0	0	0	0	0	0	0	0	0	0	0	0	0	0	0	0	0	0	0	0	0	0	0	0
ACBD5		NM_001271512	0.113597	27484142	27529808		NP_001258441.1	523		chr10		0	0	0	0	0.0601519	0.341404	0	0.0663673	0	0.0324441	0	0.204169	0.47147	0.0582675	0.142574	0.271248	0.219772	0	0	0	0.402944	0	0	0.256336	0.771627	0.212355	0	0.139748	0.20864	0	0.58204	0.0685665	0.192258	0	0.882839	0.284497	0	0.645857
ACBD5		NM_145698	0.212036	27484142	27529808		NP_663736.2	525		chr10		0.791162	0.12078	0	0.594915	0.531858	0	0.698186	0.133008	0.382948	0.512065	0.263421	0.228522	1.03594	0.508719	1.65736	0.157282	1.29877	0.335458	0.146062	0.0977307	0.200276	0.202099	0.473692	0.158806	0.631345	0	0	0.64959	0.183226	0	0	0.434962	0.168974	0	0.683801	2.61105	0.321248	0.706914
ACBD5		NM_001301253	0.109634	27484142	27531068		NP_001288182.1	416		chr10		0	1.57337	0	0.331756	0	0	0	0	0.144337	0.134106	0	0	0.629479	0.6759	0.080887	0.0956976	0	2.26297	2.69962	0.854231	0	0	0	0	0	0	0.700326	0.333519	0	0.459015	0.0660631	0	0	0.391898	0	0.197039	0	0.389246
ACBD5		NM_001301251	0.0621585	27484142	27531068		NP_001288180.1	416		chr10		1.18907	0	0.239571	0	0	0.103979	0.689696	0	0.167572	0	0	0.384619	0	0.0451741	0	0	0	0	0	0	0	0.298055	0	0	0	0	0	0	0.929569	0.0360011	0	0	0	0.436528	0	0	0.396016	0
ACBD5		NM_001042473	0.369965	27484142	27531068		NP_001035938.1	490		chr10		0.437671	2.28845	0.435392	0.553311	1.1477	0.24875	0.0430523	1.08679	0.134689	0.525946	1.04624	0.948514	3.21849	2.36713	2.73661	1.43707	4.0839	0	1.17785	0.275628	0.147994	0.136501	0.377897	0.271124	0.551875	1.5033	0.132133	1.24084	0.194586	0.543825	1.15539	1.15787	3.65457	0.849862	0	1.70668	0.277681	1.37511
ACBD6		NM_032360	1	180257351	180472022		NP_115736.1	282		chr1		17.8156	34.2526	5.77143	11.5323	16.8764	5.96562	18.6671	14.9496	16.7586	10.8195	18.6225	6.69136	6.96146	16.4461	9.55525	7.876	7.96951	13.3521	43.2992	20.9713	12.9183	12.2767	8.84303	8.5724	8.52753	7.90005	6.84302	8.66047	4.67586	7.05842	12.9167	12.2477	6.99455	3.21442	8.73298	13.59	11.9008	8.70079
ACBD7		NM_001039844	1	15117473	15130775		NP_001034933.1	88		chr10		0.964825	0.54684	0.156534	0.285872	1.25402	0.748861	0.382622	0.33713	0.131442	0.311399	0.427964	0.812246	0.31573	0.349256	0.928275	0.665579	0.531814	1.11096	4.49995	0.174539	0	1.54639	0.557747	0.397067	0	0.218019	0.430383	0.632089	0.837313	0.173389	0.0539853	0.0422596	0.224532	0.229894	0.355401	0.0995787	0.888693	1.15005
ACCS		NM_001127219	0.396566	44087728	44105569		NP_001120691.1	501		chr11		0.229425	0	0.216027	0.14892	3.82018	0	0	0.578942	0.240367	0.991897	0.624279	0	0.14625	0.29212	0.367888	1.00563	0	0.120202	0	0.546312	0	0	0.111866	0	0.388327	0.278693	3.21273	0.762937	1.36838	0.211541	0.967275	0.653866	1.1579	0.981905	0	1.00552	0.586252	0
ACCS		NM_032592	0.603434	44087811	44105569		NP_115981.1	501		chr11		0.353604	0.171661	0.115052	0	1.08047	0.689382	0.0363355	0.846101	0.0801049	0.481811	1.01309	0.247238	0.393641	0.617245	0.376776	0.634595	0.167551	0.368834	0	0.193823	0.703267	0.0348933	0	0	0.418894	0.41294	0.651835	0.620186	1.12252	0.279264	0.368596	0.393573	0.586985	0.118088	1.46123	1.56499	0.224878	0.305542
ACCSL		NM_001031854	1	44069530	44081527		NP_001027025.2	568		chr11		0	0	0	0	0	0	0	0	0	0	0	0	0	0.0193436	0	0	0	0	0	0	0	0.0555911	0	0	0	0	0.0516832	0.0255353	0.0405736	0.0202263	0.1483	0.0592413	0	0	0	0	0	0
ACD		NM_001082487	0.0189478	67691414	67694718		NP_001075956.1	528		chr16		0	0	0	0	0	0	0.27097	0.0397354	0	0	0	0	0	0	0.506319	0	0	1.628	0.0511253	0.1361	0.177515	0.0826501	0	0	0	0	0	0	0	0	0.0683011	0.0644819	0	0	0	0	0	0
ACD		NM_022914	0.114809	67691414	67694718		NP_075065.2	541		chr16		0	1.44342	0	0	0	0	5.01826	0	0	0	0	0	0	0	0	0	0	0	0.869481	13.5711	0	8.78947	4.14382	0	0	1.30175	0	0	0	0	0	0	0	0	0	0	0	0
ACD		NM_001082486	0.866243	67691414	67694718		NP_001075955.1	544		chr16		6.39293	0	2.66877	4.1974	7.61497	3.3772	21.7274	6.04975	5.58773	6.86954	8.70518	3.76594	9.01063	12.0485	10.6176	7.96835	10.8744	0	19.0655	0	5.34709	3.33319	2.93289	11.5983	6.87096	1.96436	12.2709	10.0708	5.77123	5.66732	10.4613	11.3896	18.2594	3.35237	5.19263	6.74938	12.0502	9.20277
ACE		NM_000789	0.874309	61554421	61575741		NP_000780.1	1306		chr17		0.293086	0	0.100417	0	0.741088	0.0344015	0.07164	0.0686512	0.0770252	0.241363	0.142767	0.903383	0.887312	0.209566	0.709304	0.0588798	0.354415	0.0391486	0.038646	0.0542391	0.1397	0.137798	0.252717	0.0288814	0.0232043	0.0257902	0.0718807	0.0100759	0.0148688	0.0712112	0	0	0	0.0692666	0.0627813	0.259366	0.0843438	0.0731036
ACE		NM_001178057	0.0533021	61562177	61575741		NP_001171528.1	691		chr17		0	0	0.0912086	0	0.203653	0	0	0	0	0	0	0	0	0	0	0	0	0	0	0	0	0	0.116858	0	0	0	0	0	0	0.0141109	0	0	0	0	0	0	0.03683	0
ACE		NM_152830	0.0723886	61562177	61575741		NP_690043.1	732		chr17		0	0	0	0	0	0	0	0	0	0.081459	0.0260065	0.317421	0.298105	0.0957137	0.062406	0	0.303345	0.0374087	0	0	0	0	0	0	0	0	0	0.0167529	0	0	0	0	0	0	0	0	0	0
ACE2		NM_021804	1	15579155	15620192		NP_068576.1	805		chrX		0	0	0.0621432	0	0.0154756	0.037128	0	0	0.023229	0.0121359	0.0152449	0.0356311	0.131763	0	0	0	0	0	0.0178814	0.0200893	0	0.0260884	0	0	0	0	0.0563136	0.0236024	0	0.0531542	0.0240871	0.0524661	0	0.0861562	0	0	0	0
ACER1		NM_133492	1	6306509	6333640		NP_597999.1	264		chr19		0	0	0.0914412	0	0.875041	0	0	0	0.104165	0.0367427	0	0	0	0.0408256	0	0	0	0	0.0723069	0.0611321	0	0.15983	0.216669	0	0	0	0.0598096	0	0	0.0927569	0	0	0	0	0	0	0	0
ACER2		NM_001010887	1	19408924	19452500		NP_001010887.2	275		chr9		0.379524	0.139528	0.102814	0.299655	1.22061	0.0453445	0.0672315	0.0755224	0.112439	0.103977	0.276316	0.310171	0.66982	0.413806	0.120148	0.624217	0.783816	0.307678	0.0867456	0.0289885	0.36409	0.387697	0.131287	0	0.515999	0.138763	0.060374	0.183439	0	0.0455516	0.111375	0.0837265	0.280658	0.243754	0.182663	0.140474	0.236325	0.197818
ACER3		NM_001300955	0.0764358	76571916	76737841		NP_001287884.1	172		chr11		0	1.44064	0	0.312366	0.0970665	0	0	0	0	0	0.0718815	0	0	0.469779	0.0255685	0	0	0.457237	0	0.911933	0.0464902	0	0	0	0	0	0	0.0258419	0	0	0	0.0365351	0.123506	0.223683	0.449801	0	0	0.202905
ACER3		NM_001300953	0.134163	76571916	76737841		NP_001287882.1	230		chr11		0	0.874907	0	0.356346	0	0	0	0	1.81164	0.0437179	0	0	0	0.447593	0	0	0	2.10533	0	0.0457753	0	0.149282	0.548267	0	0.0562384	0	0	0	0	0	0	0	0.0338067	0.634544	0	0	0	0
ACER3		NM_018367	0.763248	76571916	76737841		NP_060837.3	267		chr11		1.3896	1.82244	0.91817	0	3.68459	1.16889	1.7732	1.05449	0.141241	1.87194	2.4278	0.48797	1.15518	2.92096	1.34844	1.00327	1.11844	0	2.61001	0	0.607965	0	0	0.472393	1.98973	1.5582	0.822697	0.548712	0.777876	0.537206	2.16427	1.26634	1.21117	0	0.902864	3.5732	1.21414	0.911653
ACER3		NM_001300954	0.0261529	76571916	76737841		NP_001287883.1	172		chr11		0	0	0	0	0.0560827	0	0	0.0250247	0	0.178187	0.0713325	0.168005	0.0626849	0.0134008	0.135636	0	0.0911412	0	0.129329	0	0.0379739	0	0	0	0.0501172	0	0	0	0	0.0272519	0.173431	0.0257205	0	0.185957	0.0263798	0.175764	0	0
ACHE		NM_015831	0.866788	100487614	100493541		NP_056646.1	617		chr7		0.567956	0.0424501	0.218393	1.13791	0.195951	0.0937868	0.0643528	0.109547	1.03975	0.181791	0.117873	0.169771	0.341868	0.218597	0.103999	0.212072	1.08214	0.135871	0.0446827	0.0843242	0.571357	0.298531	0.6966	0.0884956	0	0.127204	0.481396	0.0850472	0.101456	1.10076	0.177623	0.621624	0.156281	0.290273	0.276447	0.514657	0.222898	0.118786
ACHE		NM_001282449	0.0318354	100487614	100493592		NP_001269378.1	526		chr7		0	0	0	0	0	0.0998428	0	0	0.173131	0	0	0	0	0.0308685	0	0	0	0	0	0	0.321643	0	0	0	0	0	0	0	0	0	0	0.241537	0	0	0	0	0	0
ACHE		NM_000665	0.0258239	100487614	100493592		NP_000656.1	614		chr7		0	0	0	0	0	0	0	0.0509502	0	0	0	0	0	0	0	0	0	0	0	0	0	0.0764242	0	0	0	0	0.0276646	0	0	0.0436848	0	0	0	0	0	0	0	0
ACHE		NM_001302622	0.0408445	100487614	100493754		NP_001289551.1	614		chr7		0	0	0	0	0	0	0	0	0.514744	0	0	0	0.877838	0	0	0	0.286733	0	0	0	0	0	0.164863	0	0	0	0	0	0	0.196968	0	0.511645	0	0	0	0.213306	0	0
ACHE		NM_001302621	0.0347084	100488336	100493592		NP_001289550.1	617		chr7		0	0	0	0	0	0	0	0	0	0	0	0	0.407536	0	0	0	0	0	0	0	0	0	0	0	0.104468	0	0	0	0	0	0	0	0	0	0	0	0	0
ACIN1		NM_001164816	0.625887	23527773	23540779		NP_001158288.1	614		chr14		14.0775	0	5.51954	8.83997	9.74957	4.87185	17.0087	9.76209	9.28267	15.457	12.5873	5.41573	10.0228	13.4124	13.5386	9.30097	10.2183	0	48.457	7.78622	6.42411	15.0709	6.85436	4.5162	7.13936	9.50137	6.05949	6.86905	7.67806	8.04676	16.0588	23.2228	10.6143	3.2581	7.10579	9.18159	12.7355	16.147
ACIN1		NM_001164817	0.0866692	23527773	23540779		NP_001158289.1	583		chr14		0.378096	0.333189	0.537518	0	0.338411	0.502238	0.16644	1.39493	0	1.58155	2.42834	0.147569	1.44825	1.95382	3.06814	0.605797	0.654799	0.0798917	0.296213	0	3.87267	0.629837	0	0.629556	2.17718	0.837962	2.47508	1.17044	1.08401	0.0846521	1.36606	1.0486	1.97288	0.376021	0.397699	1.79292	1.65224	2.54004
ACIN1		NM_001164815	0.168663	23527773	23564823		NP_001158287.1	1301		chr14		7.48657	2.71962	1.15574	1.5297	0.645663	1.01998	1.34004	3.46567	1.11295	3.02097	3.04011	2.14358	3.89352	3.18361	5.85087	2.43092	1.9865	0	0.688331	1.95722	5.21499	2.47434	0.14319	0.813241	2.08755	2.75223	0.628661	3.6773	2.9166	2.59885	2.32608	1.42818	2.78996	0.743976	1.61461	2.85382	3.41124	4.83854
ACIN1		NM_001164814	0.11743	23527773	23564823		NP_001158286.1	1328		chr14		2.69268	0.307359	0.622109	0.999098	1.70749	0.37079	1.1828	2.15696	0	1.63738	2.05441	1.68828	1.92118	1.83909	4.18461	0.670696	1.20829	1.05589	0.790135	0.818586	2.69093	1.43263	0.379792	1.59089	1.45711	1.84109	1.96533	2.53925	0.629453	0.573422	1.21375	2.04095	2.32774	0.197238	1.35941	2.05389	2.50934	2.4148
ACIN1		NM_014977	0.00135069	23527773	23564823		NP_055792.1	1341		chr14		0	0	0.0461767	0	0	0	0	0	0	0	0	0	0	0	0	0	0	0	0	0	0	0	0	0	0	0	0	0	0	0	0	0	0	0	0	0	0	0
ACKR1		NM_002036	0.791306	159173802	159176290		NP_002027.2	336		chr1		0	0	0.0680816	0	0	0	0.0319713	0	0.0994874	0.70612	0	0	0	0.0156364	0	0	0	0	0	0	0	0.0567152	0.244769	0	0	0	1.18521	0	0	0.0131257	0	0	0	0.13604	0	0.0631414	0	0
ACKR1		NM_001122951	0.208694	159175048	159176290		NP_001116423.1	338		chr1		0	0	0	0	0	0	0	0	0	0.126424	0	0	0	0	0	0	0	0	0	0.0601037	0	0	0.378924	0	0	0	0.196949	0	0	0.0232485	0	0	0	0.231289	0	0	0	0
ACKR2		NM_001296	1	42850963	42908775		NP_001287.2	384		chr3		0	0.0220479	0.0988867	0	2.92012	0.0613382	0.0610061	0.0222035	0.163595	0.0833318	0.045168	0.0372409	0.0406481	0.0402555	0.078135	0.030196	0.0784939	0	0.0555418	0.0514843	0.113397	0.0866594	0.312191	0	0	0.0926954	0.0275633	0.0181913	0	0.10022	0	0	0	0.106939	0.0488071	0	0	0
ACKR3		NM_020311	1	237478379	237490994		NP_064707.1	362		chr2		73.1845	0.025381	0.654294	6.48516	0.0722988	0.734124	0.300085	72.5933	6.61673	6.01615	5.8007	0.146795	0	0.0316618	0	0.0729301	0	0	4.21205	0	0	0.346274	0.14869	0.0790562	0	0	0.0808004	0.0487196	0	0.0648116	0	0	0	0.260089	0.272469	0.264558	0.0498072	0
ACKR4		NM_016557	0.425006	132316080	132321485		NP_057641.1	350		chr3		0	0	0.0712317	0	0	0	0.0558	0	0.035514	0.0706602	0	0	0.0798425	0.0826101	0.0803626	0.0428436	0.110732	0	0.0283603	0	0	0	0.154985	0.0585199	0	0	0	0	0.0580995	0.0247004	0	0.0685056	0.498485	0.147342	0	0	0	0
ACKR4		NM_178445	0.574994	132318980	132321485		NP_848540.1	350		chr3		0.0535499	0.0910299	0	0.0780978	0.0800646	0	0	0.105209	0	0	0.0793666	0.383512	0	0.189557	0	0.119695	0	0	0	0	0.0699724	0.10168	0	0	0.0400612	0.0556029	0.104075	0.0770372	0	0.0122086	0.0615853	0.433671	0.257349	0.268132	0.0288259	0.0827433	0.0337493	0.0458136
ACLY		NM_001303275	0.281337	40023169	40075275		NP_001290204.1	1145		chr17		5.68587	25.3317	3.53907	7.03886	4.18107	4.23571	15.8178	4.34298	3.34189	4.44404	3.17427	1.69956	2.27007	9.45717	1.19403	3.08676	2.62063	25.8763	16.9587	17.5642	2.32472	12.9179	2.63792	2.42985	7.83112	0.926417	0.823513	2.93647	4.44504	2.71602	4.95564	7.98286	4.29137	2.38502	10.4261	5.51459	11.7062	3.53654
ACLY		NM_001303274	0.267144	40023169	40075275		NP_001290203.1	1155		chr17		3.7215	3.37654	2.70756	2.93449	16.476	4.47556	13.7815	5.20893	0.91102	6.58373	6.98713	5.1876	8.66175	4.97539	6.8377	4.15796	9.08641	2.25344	6.6432	6.75458	6.69419	5.47857	0.497551	7.43247	13.4713	8.33288	0.690306	7.09269	2.62268	2.58203	8.26281	15.617	3.99521	0.486751	12.5879	9.82722	12.0356	8.09748
ACLY		NM_198830	0.196766	40023178	40075272		NP_942127.1	1091		chr17		9.54834	0.198138	5.2922	3.55349	1.67477	0.449961	14.3729	7.32912	2.28147	3.08896	4.96529	0.796809	3.23656	5.99625	1.65523	2.24472	1.89822	0	2.36984	1.02548	3.48025	2.98432	3.30359	2.11148	4.71068	0.960665	6.36887	6.60635	2.95329	3.80545	4.29293	4.85234	4.91148	1.58145	7.23593	6.2423	14.1513	4.81622
ACLY		NM_001096	0.254753	40023178	40075272		NP_001087.2	1101		chr17		6.22059	0.0264692	4.03601	1.48288	6.703	0.483716	12.5248	8.76055	0.619887	4.59871	10.9072	2.46973	12.3556	3.15439	9.49183	3.0357	6.63827	0	0.933607	0.398357	9.95525	1.27087	0.6186	6.49868	8.16327	8.70971	5.2728	15.854	6.27051	3.6087	7.18253	9.56529	4.56757	0.321286	8.76854	11.1336	14.5324	11.0256
ACMSD		NM_001307983	0.133333	135596185	135659602		NP_001294912.1	278		chr2		0	0	0	0	0	0	0	0	0	0	0	0	0	0	0	0	0	0	0	0	0	0	0	0	0	0	0	0	0	0	0	0	0	0	0	0	0	0
ACMSD		NM_138326	0.866667	135596185	135659602		NP_612199.2	336		chr2		0	0	0	0	0	0	0	0	0	0.0424607	0	0.151902	0	0.0293984	0	0	0	0	0.0689529	0	0	0.0544712	0.18105	0	0	0	0.0699408	0	0	0.0269586	0	0	0	0	0	0	0	0
ACO1		NM_002197	0.988737	32384600	32450832		NP_002188.1	889		chr9		0.787431	22.9589	5.23615	1.8177	3.26312	3.95132	12.1308	7.37024	4.56971	10.0229	6.54542	2.94511	2.73902	8.23319	5.41009	1.21489	4.24217	4.87524	10.0766	1.12493	2.73525	2.49552	0.738375	0.579644	4.28937	5.55515	2.88636	4.95	3.87814	3.22615	3.38036	6.02503	8.91186	4.49688	2.57159	15.3816	12.3596	3.90108
ACO1		NM_001278352	0.011263	32384600	32450832		NP_001265281.1	889		chr9		0	0	0	0	0	0	0	0	0	0.0233557	0	0	0	0.213057	0	0	0	0	0	0	0	0.199543	0.233165	0	0	0	0.0184452	0	0.535582	0	0	0	0	0.156122	0	0.302324	0.477263	0
ACO2		NM_001098	1	41865128	41924993		NP_001089.1	780		chr22		15.6328	1.72324	6.57029	10.0975	8.94118	2.95507	20.1549	11.0506	9.20817	14.0739	17.5624	12.9702	20.3329	14.7701	15.8895	5.76435	11.6389	0.162176	28.0592	9.33007	16.2098	7.84809	4.94009	13.8365	6.49891	19.6175	29.2393	54.8028	29.0426	55.7021	26.7289	28.1419	37.5041	8.27735	4.69102	25.2773	20.8358	10.9723
ACOT1		NM_001037161	1	74003927	74010498		NP_001032238.1	421		chr14		0	2.09649	1.27154	11.3402	16.904	0.504823	4.26249	3.84049	0.916217	3.12033	1.05497	0.82645	4.75608	0.0202935	1.24592	1.21	0.849668	2.25505	10.0685	2.88845	0	0.684909	0.228826	0	1.84537	5.04801	0.0914811	2.56653	1.80922	5.21891	2.49427	4.07016	3.5672	2.18615	2.65085	4.90827	2.34165	3.07227
ACOT11		NM_147161	0.945624	55013806	55076005		NP_671517.1	594		chr1		0.106461	0.0198616	0.110835	0	0.0788552	0	0.286656	0.587216	0.0578912	0.305906	0.735657	2.92148	3.59202	2.24296	1.78087	2.89902	0.788194	0.0937696	0.100088	0.830407	0	0.163639	0.294822	0	0.601276	1.46337	0.0153393	0.483555	0.471385	0.587526	0.25623	0.0509237	0.443885	0.110265	0.445383	1.83526	0.409339	0
ACOT11		NM_015547	0.0543755	55013806	55100417		NP_056362.1	607		chr1		0	0	0	0	0	0.051767	0	0	0	0	0	0	0	0	0	0	0	0	0	0	0	0	0	0	0	0	0.0606673	0	0	0	0	0	0	0	0	0	0	0
ACOT12		NM_130767	1	80625946	80689988		NP_570123.1	555		chr5		0	0	0	0	0	0	0.0496444	0	0	0	0	0	0	0	0	0	0	0	0	0	0	0.0704684	0.166387	0	0	0.0606899	0.0393121	0.0487091	0	0.228634	0	0.0477714	0	0.0814397	0	0	0.0606361	0
ACOT13		NM_018473	0.976515	24667262	24705295		NP_060943.1	140		chr6		4.41584	11.467	1.95757	3.96217	4.2874	1.00909	4.1273	2.61143	1.99966	2.90443	2.23791	2.26823	4.38759	5.03255	1.16425	2.6691	1.51279	13.9415	5.03323	6.77336	3.12521	5.25729	3.24148	1.9275	2.56074	2.6889	2.51526	1.02029	0.858861	1.58059	2.93684	2.41173	0.996199	1.23423	2.53866	2.22514	1.81229	2.17806
ACOT13		NM_001160094	0.0234847	24667262	24705295		NP_001153566.1	117		chr6		0.0817694	0.248644	0.147416	0	0.0551053	0	0.0983513	0.0509479	0	0.0655642	0.100923	0	0.205794	0.154302	0	0.0844948	0	0.363471	0.174659	0	0.142881	0.0230005	0.171639	0	0	0.0510141	0.0339096	0.0540426	0	0.208651	0.0994574	0.0316449	0.076723	0	0.0445771	0.0463644	0.0613358	0.137615
ACOT2		NR_046028	0.201728	74034323	74042362		na	na		chr14		0	3.30328	0.174944	0.620058	8.53514	0	0.470158	0.877278	0	0.310409	0.183129	0.367742	0.528311	0	0.34751	0.640272	0.240026	6.29321	3.72118	2.26057	0	0.166982	0.241498	0	0.839803	0.884471	0	0.627655	0.270636	0.206787	0.535504	0.684546	0.574304	0.303666	0.584079	0.646913	0.26049	0.568825
ACOT2		NM_006821	0.798272	74035762	74042362		NP_006812.3	483		chr14		0.0929395	1.21731	2.01985	10.6198	9.69432	1.14547	3.05536	4.63677	1.7032	3.27082	1.95007	1.0525	4.59222	0.023157	1.45905	2.09905	0.747962	0.791947	8.81968	0.904168	0	0.602765	0.495584	0.0643715	2.31691	4.3695	0.0829391	2.15819	2.19631	5.60448	2.84858	4.22418	3.23353	2.64558	3.24234	5.36654	2.17199	3.67951
ACOT4		NM_152331	1	74058409	74062470		NP_689544.3	421		chr14		3.56841	0.648543	0.262209	3.15869	37.1273	0.182717	0	0.210371	0.0834907	0.790355	0.439942	3.02485	1.47439	0.0199123	0.527765	1.5988	0	0.847363	0.0474003	0.309965	0	0.263794	0.300366	0.0644417	0	0.0685901	0.0933692	0.561505	0.0669058	0.16206	0	0	0	0.212007	0.548487	1.94127	0.852777	0
ACOT6		NM_001037162	1	74083547	74086592		NP_001032239.1	207		chr14		0	0.0613576	0	0	2.84004	0	0	0	0	0.049606	0	0	0	0	0	0	0	0	0	0	0	0	0	0	0	0	0.0758511	0	0	0.05252	0	0	0	0	0	0	0	0
ACOT7		NM_181866	0.839804	6324331	6419004		NP_863656.1	329		chr1		9.05038	25.3114	24.0092	17.2902	18.3913	23.6671	82.9879	35.6835	10.4287	33.2604	59.6845	22.0858	14.7947	61.3354	24.8875	12.9138	27.2143	16.6349	101.204	27.4237	14.5869	46.8083	6.75841	21.5573	12.9353	34.1775	137.422	59.4765	141.713	26.2751	64.2746	56.1541	76.5607	18.1267	11.0511	15.0583	68.2138	48.124
ACOT7		NM_181865	0.0252742	6324331	6420764		NP_863655.1	350		chr1		0	0	0	0	0	0	0	0	0.487558	0.625697	0	19.93	6.99637	0.448069	0	0.615013	0	0.111263	0	0	0	0.0532009	1.60718	0	0	0.743909	4.75691	0	1.45315	0.770013	0	0	0	0	0.532529	0	0	0
ACOT7		NM_181864	0.0630019	6324331	6445883		NP_863654.1	380		chr1		0	0	0.207034	3.33818	0.540964	0.590382	0.460907	0.355909	7.67765	3.24984	9.38417	0	0	0.181614	0.264258	0.207479	0	0	0.153443	0	0	0.142775	0.678623	0.875379	6.2819	8.29356	11.1332	15.4707	27.0111	9.98124	19.7951	30.5488	16.145	5.51973	0	0.686203	1.13832	2.64692
ACOT7		NM_007274	0.07192	6324331	6453826		NP_009205.3	370		chr1		0.465434	0.174878	2.19122	3.17475	0.456841	4.52448	1.2308	3.43279	2.67727	3.97171	2.85824	1.74855	1.32922	1.2192	1.04626	2.04457	2.99803	0.420406	7.39695	0.457118	3.73037	1.36007	0	1.27874	1.47027	1.22288	7.00119	4.6561	8.66047	1.54727	8.80383	4.9466	5.52783	3.21646	1.34156	2.45437	2.63614	3.0811
ACOT8		NM_005469	1	44470359	44486048		NP_005460.2	319		chr20		3.31624	0.632417	5.46588	9.70314	14.052	3.0695	13.6726	10.2341	9.71524	16.4293	5.30352	10.8429	4.03074	2.0549	4.19642	10.7509	9.88806	0.11118	43.1952	2.80843	3.72025	6.65741	2.8606	5.54617	5.98364	6.21706	19.2418	6.51656	7.0215	4.03559	20.7368	14.0434	16.4557	6.96715	3.02801	4.91338	5.93812	11.4927
ACOT9		NM_001033583	0.366287	23721776	23761407		NP_001028755.2	439		chrX		1.85205	5.16561	2.60373	3.58334	4.69247	1.09926	2.45722	0.543737	1.18912	0.911432	0.720093	2.09377	3.07521	10.7723	2.09069	1.77497	5.79762	7.55977	0	2.69424	0.309895	3.74341	3.0656	0.295147	0.426951	0.431304	0	0.367782	1.13118	0.104747	0.833929	0.469654	0.291412	2.41859	0.854113	2.11861	0	4.92477
ACOT9		NM_001037171	0.633713	23721776	23761407		NP_001032248.1	448		chrX		1.24573	24.1065	2.00314	2.90471	2.38115	7.16202	9.13122	12.8104	2.57091	8.18129	11.9925	0.886232	0.393303	7.14227	0.572528	0.294219	0.366961	7.42525	1.40029	0	4.07306	0.622976	0	2.35819	3.65456	4.37074	9.09695	3.37974	4.59778	2.28902	9.63596	10.6599	8.00367	0	5.19689	9.72815	3.79645	6.0177
ACOX1		NM_001185039	0.0670363	73937588	73975515		NP_001171968.1	622		chr17		0.265493	0	0	0	0.206757	0	0.195482	0.0825754	0.119477	0.0414536	0.0983349	0.479129	0.0784338	0.0872983	0	0.199212	0.0657215	0	0.0905183	0.0674239	0.0674996	0.066555	0.204036	0	0.109034	0.0730412	0.143494	0.0625043	0.100992	0.0498379	0.0542792	0.402213	0.181752	0.23298	0.107474	0	0.102827	0.0628644
ACOX1		NM_004035	0.638645	73937588	73975515		NP_004026.2	660		chr17		1.05219	0.305706	0.379657	0.23336	6.85198	0.632922	2.58356	1.09832	1.53958	0.9787	2.53285	1.21617	2.20972	3.52062	1.5927	1.85921	1.95298	0	3.31469	0.963323	0.47786	1.22353	0.677343	0.534214	0.980931	1.67376	0.596441	1.04215	0.994611	1.56833	1.23857	1.20717	1.2512	0.617901	0.849012	2.39171	1.39352	2.12046
ACOX1		NM_007292	0.294319	73937588	73975515		NP_009223.2	660		chr17		0.573141	1.41958	0.350537	0.525436	0.479146	0.276925	0.763863	0.520025	0.474975	0.643481	0.965375	1.31271	0.599756	0.705516	0.971862	0.660607	1.09505	1.23544	0.0861831	0.194483	0.249254	0.526048	0	0.0834737	0.169391	0.524405	0.852204	0.38752	0.210742	0.0676105	0.877685	0.676745	0.485286	0.190529	0.106512	0.663601	0.678315	0.211774
ACOX2		NM_003500	1	58490862	58522929		NP_003491.1	681		chr3		0.101197	1.75911	0.1017	0	8.78889	0	0.644533	0.0528514	0.446819	0.308999	1.38455	0.0571862	0.186446	4.27341	0	0.0497202	0.0420484	0.266298	0.0297113	0.152561	0	0.10851	0.171661	0	1.37153	0.144528	0.133277	2.30951	0.0714248	0.533095	0.0874865	2.28435	1.66469	1.40087	0.340788	2.73138	0.289293	4.25019
ACOX3		NM_001101667	0.403831	8368008	8442452		NP_001095137.1	624		chr4		0.352211	0.516001	0.903349	0	0.298808	0.480577	0.256619	1.46113	0.0762473	0.63792	0.339322	0.380357	0.299017	0.367321	0.285325	0.198227	0.423083	0.564561	1.31028	0.292588	0.579223	1.03216	0.776854	0	0.6335	0	0.0496278	0	0.220555	0.422252	0.628976	0.607974	0.0641672	0.414966	0.475084	0.354759	0.170954	0.133516
ACOX3		NM_003501	0.596169	8368008	8442452		NP_003492.2	700		chr4		1.53322	0.152824	0.635076	1.16292	1.32439	0	1.38065	2.48432	1.11393	1.1073	0.856402	0.370754	0.561641	0.668894	0.983958	0.417868	0.282425	0	1.76012	0.706205	0	0.453981	0	0.435947	1.62861	0.724521	0.684904	1.02311	0.627321	0.408985	0.221792	0.666565	1.30345	0.095891	0.0529236	1.0886	1.5694	1.53678
ACOXL		NM_001142807	1	111490149	111875799		NP_001136279.1	580		chr2		0	0.219473	0.0584971	0	0.026933	0	0	0.0365906	0.0571716	0.0349822	0	0.0708145	0	0.309288	0.216738	0.206941	0.0542778	0.0948993	0.0983545	0	0	0.107184	0.32622	1.53609	0	0	0.127169	0.0405742	0	0.0703796	0.0633461	0	0	0.0968942	0	0	0.0381129	0.150042
ACP1		NM_001040649	0.113071	264868	272481		NP_001035739.1	112		chr2		6.10201	0.581031	3.51439	2.94949	1.49823	1.29957	3.80575	1.63462	5.65844	2.46042	2.86905	2.69438	1.81112	2.78208	2.08146	3.33636	4.2205	0	3.13568	0.416814	1.13434	2.94962	4.27858	1.49933	1.86361	1.19186	4.24828	1.5346	4.21869	3.21184	1.82778	2.07782	1.91656	2.58556	3.31375	1.3318	1.84003	1.25867
ACP1		NM_004300	0.673767	264868	278282		NP_004291.1	158		chr2		20.2527	33.5969	7.76701	4.82456	13.6946	4.14328	26.043	14.2086	8.2805	11.7787	26.8768	21.6198	10.093	30.8625	10.6537	16.6969	24.381	45.6769	53.9385	14.9026	16.4725	22.1727	13.3732	7.69752	12.6098	13.805	11.2988	10.2616	12.3235	10.9718	17.6772	20.2771	11.517	4.81988	15.6831	10.972	13.6586	11.3844
ACP1		NM_007099	0.172536	264868	278282		NP_009030.1	158		chr2		1.47604	9.92434	1.54333	1.58987	3.51274	1.46653	6.13704	4.40613	10.173	3.59129	7.6541	0.873198	2.94926	14.5786	3.1425	4.1688	4.1816	5.0229	9.51166	0	1.41524	5.73303	5.16488	0.490274	4.31207	2.96853	3.08696	1.74657	3.96874	3.5417	6.7847	4.41116	2.60848	2.95197	2.92605	3.61054	2.35482	6.02019
ACP1		NR_024080	0.0406261	264868	278282		na	na		chr2		0.192848	3.9223	0.149426	1.35886	1.03336	0	2.2432	0.438316	1.61379	2.53416	1.64261	0.856439	0.464249	2.24678	0.370262	2.11828	1.86539	0	1.51134	1.46553	0	0.263639	0	0	0.572328	0.654025	0.484556	0.388769	0.672556	0.0489393	1.05319	0.620147	1.47849	0	1.12279	1.04993	0.826071	1.62856
ACP2		NM_001302489	0.0994251	47260852	47270179		NP_001289418.1	395		chr11		1.00096	0	0	0	0.462923	0	0.630266	0	0.278171	0.522751	0.434778	0	0.379397	0.513125	2.81453	0.844469	0.191265	0.240235	0.0770169	0.127412	0	0.575774	0	1.33912	0	0.509125	0.43222	0.630561	1.2725	0.168707	0	0	0	0.10128	0.554811	0	0.873448	0
ACP2		NM_001302491	0.126458	47260852	47270398		NP_001289420.1	360		chr11		0	0.739379	0.947429	3.06076	0	0.138548	6.92229	0	1.44637	0.062498	0	0.413436	0	0	0	0.455304	1.16987	0	3.27629	0.344446	0	1.009	3.44896	0	0	0	0.528406	0	0	3.42412	0	0	0	0.586758	0	0	0	0
ACP2		NM_001302490	0.129948	47260852	47270398		NP_001289419.1	391		chr11		0	0.464952	0.972427	0	1.47326	0	5.36801	0	2.3963	0.524622	0.418783	0	0	0	0	0.417947	1.25624	0	4.56074	0.470469	0	0.376053	1.04724	0	0.226966	0	1.58713	2.1994	0.261182	5.40771	0	0.612064	0	0.618638	0.563416	0.239419	0.139597	0
ACP2		NM_001302492	0.148328	47260852	47270398		NP_001289421.1	236		chr11		2.75098	0	0.376544	2.35843	1.11759	0	1.38634	0.288841	1.79425	1.63163	1.47018	0.507711	0.879508	0.513776	0.665146	1.53087	0.102784	0	0.367064	0.272051	0.394387	0.644799	0	1.21777	0.40464	0.228958	3.48637	0.640759	0.670955	1.52138	0.250072	0.886344	0.646591	0.569727	0.312078	0.52293	0.549676	0.121435
ACP2		NM_001610	0.49584	47260852	47270398		NP_001601.1	423		chr11		1.91204	0	0.418633	0	6.23476	3.60181	0	4.92986	0	4.40737	7.93571	2.1095	3.33451	3.3641	2.83798	5.1735	0.403281	0	0	0	1.76647	0.0383187	0	2.64276	3.66999	2.48357	0	2.51687	1.70848	0	4.8627	6.29736	4.25027	0	0.984356	14.8465	3.72924	4.79994
ACP5		NM_001611	0.482603	11685474	11688553		NP_001602.1	325		chr19		0.254994	0	0	0	0	0	0	0.337306	0.179586	0	0.207799	2.10938	0.0797448	0	0	0	0	0.0479637	0	0	0	0	0	0.755105	0.211196	18.6243	72.0385	27.0452	48.94	10.5329	42.3236	27.328	82.6789	15.9523	0	0	0	0.0992029
ACP5		NM_001111034	0.233528	11685474	11689592		NP_001104504.1	325		chr19		0	0	0.181779	0	0	0	0.0785425	0.0419007	0	0	0.0503139	0	0	0.0315918	0	0	0	0	0.0457937	0	0.128292	0.119897	0.588144	0.106261	0	0.287201	1.72426	0.296216	0.961136	0.0517193	0.317415	0.207637	6.05718	1.15514	0	0	0.0578931	0.182631
ACP5		NM_001111036	0.188513	11685474	11689801		NP_001104506.1	325		chr19		0	0.0625575	0	0	0.0348566	0	0	0.150007	0.183365	0.0636865	0	0.508395	0	0	0	0	0	0	0	0.0871183	0	0.152383	0	0.170259	0	0	0.593087	0	0.294388	0.69074	0	0	0.577953	1.27843	0	0	0	0
ACP5		NM_001111035	0.0953554	11685474	11689801		NP_001104505.1	325		chr19		0	0	0	0	0	0	0	0	0	0	0	0	0	0.0278913	0	0.0437915	0	0	0	0	0	0	0	0	0	0	0	0	0	0.0465525	0	0	1.46756	0	0	0	0.0546382	0
ACP6		NM_016361	1	147119167	147142634		NP_057445.4	428		chr1		3.40101	4.31313	0.172437	0.155097	3.25121	0.944672	3.6987	0.884674	2.28527	9.26572	8.82839	5.83671	3.28505	4.08079	1.68798	6.82291	6.59179	7.09868	3.89783	0.866414	0.0819352	2.94289	2.72826	3.76966	1.74255	2.38473	2.82926	1.82013	1.6957	2.4451	3.60929	5.25507	3.67228	1.76776	1.32288	2.63632	4.53647	2.63932
ACPP		NM_001292037	0.478209	132036210	132077690		NP_001278966.1	353		chr3		0.262154	0.0214814	0.108582	0	0.0439633	0	0.0887648	0	0	0	0.0268352	0.717373	0.328482	0.0236118	0.134726	0.142993	0	0.0423047	0	1.3462	0	0	3.05959	0	0	0	0	0.232451	0	0.0253401	0.096697	0	0	0.415648	0	0	0	0
ACPP		NM_001099	0.158689	132036210	132077690		NP_001090.2	386		chr3		0	0	0	0	0	0	0	0	0	0	0	0	0	0	0	0.0392843	0.0327002	0	0	0	0	0	0	0.491817	0	0	0.0172172	0.140049	0	0	0	1.7049	0	0	0	0	0	0
ACPP		NM_001134194	0.363101	132036210	132087146		NP_001127666.1	418		chr3		0.435009	0	0	0	0.0376811	0	0.452021	0	0.0719691	0	0.093219	1.98249	0.545565	0	0.175693	0.0652164	0	0.0375746	0	0.461625	0	0	1.74287	0.206178	0	0	0.0231808	0.177406	0	0	0	0.895743	0	0.104366	0	0	0	0
ACPT		NM_033068	1	51293671	51298481		NP_149059.1	426		chr19		0	0	0	0	0	0	0.151736	0.1162	0.129304	0.193891	0.0552037	0.0748959	0.134211	0.0476635	0.123219	0.059712	0	0	0	0.0611514	0	0.269857	0.268524	0.0832268	0	0	0.310489	0.0844283	0.123664	0.18602	0	0	0	0	0.166991	0	0	0
ACR		NM_001097	1	51176651	51183727		NP_001088.2	421		chr22		0	0.111705	0.0792341	0	0.0566836	0	0.158355	0.0487454	0	0.0913626	0.0479159	0	0.264644	0.410131	0	0.0900432	0.128987	0.434434	0	0.550482	0	0.292528	0.276666	0	0	0.071603	0.149802	0	0	0.0922943	0	0.0921933	0	0.281968	0.0945608	0.57154	0	0.10601
ACRBP		NM_032489	1	6747241	6756580		NP_115878.2	543		chr12		0.188632	0.0443368	0.120834	0.14816	0.0556371	0	0.145708	0.0354588	0.0760619	0.0703715	0	0.153003	0	0.150395	0.183829	0.0682427	0	0	0.407066	0.620556	0.249777	0.214733	0.126754	0	0	0	0.148109	0	0.0397084	0.113954	0	0	0.0597848	0.172449	0.0535013	0.190285	0.13071	0.167181
ACRC		NM_052957	1	70797873	70833433		NP_443189.1	691		chrX		0.104958	0.0520862	0.138382	0.184108	0.0797209	0.166713	0.0816142	0.0890194	0.226264	0.177175	0.345243	0.0761175	0.121705	0.231876	0.252679	0.240065	0.206883	0.428764	0.934544	0.23156	0	0.272424	0.669378	0.235243	0.206419	0.183965	0.261928	0.0591221	0.117297	0.0806063	0.107397	0.298632	0.121362	0.1782	0.0891339	0.376444	0.142415	0.23209
ACRV1		NM_001612	0.43546	125542228	125550793		NP_001603.1	265		chr11		0.311569	0	0.103982	0	0.134022	0	0	0	0	0.0954925	0.0911173	0	0	0.212911	0.42176	0.0857255	0	0	0.696621	0	0	0.154421	0	0	0	0	0.310458	0.131066	0	0	0	0	0.321728	0	0	0	0.385628	0
ACRV1		NM_020069	0.462732	125542228	125550793		NP_064454.1	246		chr11		0	0	0	0	0.111189	0	0.422021	0.0528742	0.103593	0.0541536	0	0.064163	0.13252	0	0	0	0	0	0	0	0	0	0	0.0978618	0	0.0521706	0	0	0	0.297101	0	0.0801288	0	0.165168	0	0	0	0.142099
ACRV1		NM_020108	0.0541891	125542228	125550793		NP_064493.1	195		chr11		0	0	0	0	0	0	0	0	0	0	0	0	0	0	0	0	0	0	0	0	0	0.0588504	0	0	0	0	0	0	0	0	0	0	0	0	0	0	0	0
ACRV1		NM_020107	0.047619	125542228	125550793		NP_064492.1	210		chr11		0	0	0	0	0	0	0	0	0	0	0	0	0	0	0	0	0	0	0	0.229846	0	0	0	0	0	0	0	0	0	0	0	0	0	0	0	0	0	0
ACSBG1		NM_001199377	0.798097	78463186	78527049		NP_001186306.1	720		chr15		0.0642545	0.0484643	0.116627	0	0.0592844	0.140076	0.231392	0.0429558	0.131387	0.0746503	0	0	0.034817	0	0	0.117411	0.0408176	0	0.258849	0.100312	0	0.190355	0.346356	0.0348463	0	0	0.29691	0	0.203541	0.0823762	0	0.13772	0.0497118	0.20616	0.0607634	0.0773003	0.0395099	0.0671336
ACSBG1		NM_015162	0.201903	78463186	78527049		NP_055977.3	724		chr15		0	0	0	0	0	0	0	0	0	0	0.237318	0.080622	0	0.204735	0	0	0	0.0862801	0	0	0.0844254	0	0	0	0	0.426471	0	0.132778	0	0.0820309	0.227998	0	0	0	0	0	0	0
ACSBG2		NM_001289180	0.58061	6135643	6193114		NP_001276109.1	479		chr19		0	0.032334	0	0.0782824	0.0368947	0.0635526	0	0	0	0.0774842	0	0	0	0.143028	0.0512837	0	0	0	0.0500032	0.0515165	0	0.0884728	0	0	0	0.0280645	0.11318	0.0366968	0	0	0	0.0478835	0	0.0684071	0	0.0342252	0	0
ACSBG2		NM_001289178	0.197168	6135643	6193114		NP_001276107.1	666		chr19		0.101243	0	0	0	0.0446104	0	0	0	0	0	0.0500214	0	0	0	0	0	0.040481	0	0	0	0	0.114076	0	0	0	0	0.0236165	0	0.0314891	0.0445492	0	0	0	0.0981849	0	0	0.0509257	0
ACSBG2		NM_001289179	0.177778	6135643	6193114		NP_001276108.1	638		chr19		0	0	0	0	0	0	0.0421056	0.0361236	0.11006	0	0	0	0	0	0	0	0	0	0	0	0	0	0	0	0	0	0	0	0	0	0.0547037	0	0	0	0	0	0	0
ACSBG2		NM_001289177	0.0444444	6135643	6193114		NP_001276106.1	666		chr19		0	0	0.0756318	0	0	0	0	0	0	0	0	0	0	0	0	0	0	0	0	0	0	0	0.280697	0	0	0	0	0	0	0	0	0	0	0	0	0	0	0
ACSF2		NM_001288971	0.04812	48503518	48552206		NP_001275900.1	455		chr17		0	0.173451	0	0	0	0	0	0	0.352179	0	0.304434	0	0	0.171848	0	0.683933	0.192874	0	0.935506	0.092415	0	0	0	0	0	0	0.322917	0	0	0	0.203838	0.150192	0	0	0	0	0	0
ACSF2		NM_001288970	0.0700809	48503518	48552206		NP_001275899.1	572		chr17		0.286525	0	0.324601	0.280482	0.202769	0	0	0	0.472371	0	0.0972821	0.493428	0.0944255	0.723758	0	1.14812	0	0	0.27699	0	0	0.15058	0.566956	0	0	0	0.337338	0	0	0	0	0	0	0.119729	0	0	0	0
ACSF2		NM_001288972	0.0517471	48503518	48552206		NP_001275901.1	455		chr17		0	0	0	0	0.213544	0	0.108585	0.227753	0	0.0840879	0	0	0	0.239439	0	0.594203	0	0	0.189127	0	0	0	0	0	0.0706579	0	0.581062	0.0837905	0.139088	0.0822828	0	0.172209	0.106675	0	0	0	0.18626	0
ACSF2		NM_001288969	0.0246004	48503518	48552206		NP_001275898.1	602		chr17		0	0	0	0	0	0	0	0	0	0.137257	0	0	0	0	0	0	0	0	0	0	0.128892	0	0	0	0	0	0.101829	0	0	0	0	0	0	0	0	0	0	0
ACSF2		NM_025149	0.573603	48503518	48552206		NP_079425.3	615		chr17		1.41994	0	0.286794	0.431393	1.45066	0.324515	2.38234	2.42662	0.48628	3.23221	0.922331	0.833306	2.24728	0.867405	1.02318	1.35362	0.861359	0	1.79331	0.125427	0	0.770973	0	1.77951	0.715319	2.9364	0.252886	2.03109	3.13355	1.39514	1.71868	2.91408	0.627979	0	0.785642	0.793808	2.29295	1.27919
ACSF2		NM_001288968	0.0187222	48503518	48552206		NP_001275897.1	640		chr17		0.188286	0	0	0	0	0	0	0	0	0	0	0	0	0.0736221	0.100159	0	0	0	0	0	0	0.0422358	0	0	0	0.094465	0	0	0.0756073	0	0	0	0	0	0	0	0.052739	0
ACSF2		NR_110232	0.213127	48545689	48552206		na	na		chr17		0.285317	0	0.362382	0	4.31655	0.601888	2.46523	0	1.21946	0.567991	0.322209	0.295407	0	2.42405	0	2.85749	0.620343	0	3.61623	0.486448	0	4.02389	3.3523	0	0	0	0.619266	0	0.367698	0	0.787362	0.591383	0	0	1.18299	0	0	0
ACSF3		NM_001284316	0.152571	89160216	89222254		NP_001271245.1	311		chr16		0	0.147079	0	0	1.28975	0.118672	1.68894	0	0.0467552	0.136486	0.187811	1.95869	0.385869	0.78253	0	0.542324	0.758161	0.0845706	5.5673	0.508984	0	1.7777	0	0	0.0878512	0	1.69894	0.0860541	0	1.27024	1.81518	1.18725	0	0	0	0	0	0
ACSF3		NM_001127214	0.333196	89160216	89222254		NP_001120686.1	576		chr16		1.06571	0.0372868	0.386982	1.38302	0.415248	0.623558	0.782968	0.835893	0.931876	1.21185	1.00284	0.585027	2.85384	1.74171	1.07392	0.976677	0.771603	0	1.98111	0.424747	1.43833	0	0	0.162804	0	1.38151	0.60291	0.578853	0.789232	1.32474	1.61243	0.942609	1.67836	0.173563	0.0639299	0.699334	1.94371	1.31989
ACSF3		NM_174917	0.124266	89160216	89222254		NP_777577.2	576		chr16		0	0	0	0	0.301415	0	0.209622	0	0	0	0.0821415	0.138044	0.106388	0	0	0.0933096	0.230494	0	0.0970379	0	0	1.27041	0.116679	0	0.824305	0	0.159297	0.34066	0.706374	0.0651905	0	0	0	0.278062	0	0	0.590438	0
ACSF3		NR_104293	0.12335	89160216	89222254		na	na		chr16		0.542837	0	0.249988	0.488947	0.275283	0	0.561559	0.415884	0.396494	0.476586	0.35682	0.425155	0.414369	0.490054	0.444743	0.551899	0.48637	0	1.13921	0	0.12461	0.268059	0	0.244141	0.0822639	0.415556	0.191275	0.509528	0.200049	0.0537525	0.553532	0.699845	0.214087	0	0.115175	0.525525	0.732837	0.398744
ACSF3		NM_001243279	0.160461	89160216	89222254		NP_001230208.1	576		chr16		3.74858	0	0.355694	0	0.298564	0.0828286	0	0.75679	0	0.221991	0.0260111	1.61229	0.0757645	0.903324	1.37284	0.0300437	0.0401827	0	0	0	0	0	0	0.51967	0	0	0	0.885131	0	0.0103217	0	0	0.658975	0.0650362	1.14271	2.16147	0	0.847059
ACSF3		NR_045667	0.106157	89202955	89222254		na	na		chr16		0.355558	0	0.227861	0	2.39221	0	0.716041	0.103685	0.09447	0.143903	0.0806453	0.0624292	0.0863247	0.459345	0.0731371	0.144589	0.163125	0.212736	0.159106	0.101329	0	0.518539	1.21422	0	0	0.0956188	0.15755	0.0882284	0.0668929	0.114969	0.159281	0.103725	0	0.171812	0.0620951	0.0789708	0.0376373	0.103151
ACSL1		NM_001286710	0.0631884	185676748	185726942		NP_001273639.1	698		chr4		0	0	0	0	1.96811	0	0.0446602	0.0438782	0.0858183	0.113539	0	0.724375	0.819525	0.0621449	0.358944	0.137669	0.820463	0	0.0423883	0	0	0.0323902	0	0	0	0.226861	0.547363	0.211579	1.18773	0.248013	0.10783	0.488709	0.705051	0.143778	0	0.176155	0	0.163379
ACSL1		NM_001286712	0.0125669	185676748	185729755		NP_001273641.1	527		chr4		0	0	0.0966525	0	0.0876102	0.0445463	0	0	0	0.053024	0	0	0	0.035011	0	0	0.0771221	0.194983	0	0	0	0	0.270307	0	0	0.127214	0.0493667	0.0335245	0.0924423	0.0454359	0	0.0348885	0.143409	0.202512	0	0	0	0
ACSL1		NM_001286708	0.433378	185676748	185733413		NP_001273637.1	698		chr4		0.394985	2.97616	0.756827	1.35622	1.88967	0	2.49803	0.982788	0.985654	1.29719	1.18225	0.441388	2.84977	0.875323	1.99833	0.987932	6.72571	0	0.0381073	2.01562	0	0	0.2184	0	0.229687	6.74499	5.28826	0.816442	3.47086	6.28882	4.48134	4.26916	3.71774	1.48667	0	1.97241	1.34021	1.09284
ACSL1		NM_001286711	0.199435	185676748	185747268		NP_001273640.1	664		chr4		0.20169	0.50925	0.256029	0.937315	0.457512	0.0944226	0.463857	0	1.27856	0	0	0	0.219443	0	0	0.439311	2.45874	1.08869	0.686061	1.7925	0.126975	0.313179	1.81171	0	0	0	2.28569	0.074016	0	0.961912	0.222516	1.05101	0	2.00672	0	0.0709641	0	0.24384
ACSL1		NM_001995	0.291432	185676748	185747268		NP_001986.2	698		chr4		0	0	0	0	0.635408	1.43815	0.432321	1.07157	0	0.70643	0.502194	0.758514	0	0.81356	0.754746	0	0.109805	0	0	0	1.45379	0	0	1.19221	0	0.949938	0	1.2889	1.53567	0	0.365432	0.623329	2.30785	0	0.857602	0.957741	0.485254	0.161797
ACSL3		NM_203372	0.631751	223725731	223808119		NP_976251.1	720		chr2		0.630742	10.1975	3.24439	3.82409	1.92687	1.31065	4.93342	2.61406	9.72683	5.86471	9.58865	1.25544	3.32279	8.87098	1.55948	3.90345	5.11963	9.73701	8.89378	4.30212	3.09755	4.49219	1.55086	0.331448	4.46983	14.3388	4.17196	8.71038	9.26192	17.8722	20.5974	11.7957	5.9103	5.34458	2.87551	7.64969	4.3112	6.5946
ACSL3		NM_004457	0.368249	223725731	223808119		NP_004448.2	720		chr2		4.02302	2.75408	1.0245	0.745014	3.44771	1.45145	2.14194	2.54684	1.0907	0.986361	5.9847	4.87278	3.20353	7.8013	2.33928	4.97532	4.40559	2.17608	0.687212	1.56586	1.23827	3.33858	0	0.816088	4.84832	12.1766	1.54658	2.50307	5.99552	10.3288	6.12754	8.96074	4.88527	1.17372	1.00144	3.10568	2.51229	0.785034
ACSL4		NM_004458	0.813196	108884563	108976621		NP_004449.1	670		chrX		0.0775262	11.9208	1.71875	5.52281	0.088973	2.28294	5.90207	7.64274	1.97992	5.16415	9.71807	1.38845	1.56265	2.65943	1.50804	0.889132	5.42202	4.45454	6.659	2.66369	1.64759	2.2565	1.11559	1.50061	7.1909	6.61978	1.51525	4.90834	1.88169	1.21538	1.16826	4.56327	2.97115	2.18222	0.835741	5.47064	8.35643	4.93803
ACSL4		NM_022977	0.186804	108884563	108976621		NP_075266.1	711		chrX		0.155741	0.647779	0.936728	1.59491	0	0.400082	0.988013	1.27479	0.403721	0.852529	0.809691	0.162121	0.889688	1.64426	1.02291	0.547246	0.729085	0.191762	0.0294861	0.647904	0.0797253	0.130747	0.209402	0.138447	0.867001	1.36311	0.142953	1.24975	0.564618	0.302942	0.215361	0.27497	1.25229	0.699528	0.449953	0.62752	0.999495	2.80441
ACSL5		NM_203379	0.385734	114133915	114188138		NP_976313.1	683		chr10		0	8.75862	0	0	0	0	0	0	0	0.239536	0.0589835	5.048	1.37325	6.92123	0.936093	0.726434	0.708856	1.00067	3.31144	3.07625	0	0	0.537602	0	0	0.030246	0.0188145	0	0	0	0	0.0297168	0.054418	0.0810282	0.034683	1.05445	0.159453	2.69607
ACSL5		NM_203380	0.103372	114135022	114188138		NP_976314.1	683		chr10		0	0.422232	0	0	0	0.0304635	0	0.0221246	0.030113	0.145508	0	0.13403	0	1.44574	0	1.07623	0.0800008	0	0	0	0	0	0.655108	0	0.186872	0	0.0103716	0	0	0	0	0	0	0.05873	0	0.0872063	0.0717752	0.82374
ACSL5		NM_016234	0.510894	114135955	114188138		NP_057318.2	739		chr10		0	7.34109	0.0866681	0.208972	0.020464	0	2.58691	0.0951972	0	0.842943	0	10.5246	8.73157	2.23388	0.824051	20.3671	2.14764	0.0963565	0.526266	5.51565	0	0.127791	0.446551	1.58964	0.120057	0	0.0294774	0.170251	0	0.0218337	0	0	0	0	0	0.313204	1.3687	7.37225
ACSL6		NM_015256	0.0116853	131285666	131347355		NP_056071.2	722		chr5		0	0	0	0	0	0	0	0	0	0	0	0	0	0	0	0	0	0	0	0	0	0	0	0	0	0	0	0	0	0.0148982	0	0	0	0	0	0	0	0
ACSL6		NM_001205247	0.111301	131285666	131347355		NP_001192176.1	687		chr5		0	0	0	0	0	0	0	0	0.0499629	0	0	0	0	0.0401177	0	0	0	0	0.0617527	0	0	0.00955875	0	0	0	0	0.0158695	0	0.0215771	0	0	0	0	0	0	0	0	0
ACSL6		NM_001009185	0.00444693	131285666	131347355		NP_001009185.1	722		chr5		0	0	0	0	0	0	0	0	0	0	0	0	0	0	0	0	0	0	0	0	0	0	0	0	0	0	0	0	0	0	0	0	0	0	0	0	0	0
ACSL6		NM_001205251	0.108108	131285666	131347607		NP_001192180.1	622		chr5		0	0	0	0	0	0.0147392	0	0	0	0	0	0	0	0	0	0	0	0	0	0	0.0514739	0	0	0	0	0	0	0	0	0	0	0	0	0.124415	0	0	0	0
ACSL6		NM_001205248	0.152985	131285666	131347607		NP_001192177.1	697		chr5		0	0	0	0	0.0110112	0	0	0	0	0	0	0	0	0	0	0	0	0	0	0	0	0.0205683	0.067835	0	0	0	0.00794013	0	0	0.0178902	0	0.0455812	0	0	0	0	0	0
ACSL6		NM_001205250	0.611474	131285666	131347761		NP_001192179.1	708		chr5		0	0	0.0239767	0	0.0168524	0	0.0380522	0	0	0.0272917	0.015223	0	0	0.0507236	0	0.0120864	0.0151138	0.0524529	0.0401396	0.0178209	0	0.0394966	0	0	0	0.0155688	0.0191923	0.00932637	0	0.022839	0.0144421	0	0	0	0.0187028	0	0	0
ACSM1		NM_052956	1	20634558	20702578		NP_443188.2	577		chr16		0	0	0	0	0.139263	0	0	0	0	0	0	0	0	0.045613	0	0	0	0	0	0	0	0.0532246	0.169453	0	0	0	0.0313942	0	0	0.0451052	0	0	0	0.133366	0	0	0	0
ACSM2A		NM_001308169	0.25	20462782	20498991		NP_001295098.1	498		chr16		0	0	0	0	0	0	0	0	0	0	0	0	0	0.00951395	0	0	0	0	0	0	0	0	0	0	0	0	0	0	0	0	0	0	0	0	0	0	0	0
ACSM2A		NM_001308172	0.166667	20462782	20498991		NP_001295101.1	577		chr16		0	0	0	0	0	0	0	0	0	0	0	0	0	0	0	0	0	0	0	0	0	0.0127702	0.172452	0	0	0	0	0	0	0	0	0	0	0	0	0	0	0
ACSM2A		NM_001308954	0.583333	20462782	20498991		NP_001295883.1	577		chr16		0	0	0.029093	0	0	0	0	0	0.0428102	0	0	0	0	0	0	0	0	0	0	0	0	0	0	0	0	0	0.0175997	0	0	0.0177173	0	0	0	0.108893	0	0	0	0
ACSM2B		NM_001105069	1	20548082	20587695		NP_001098539.1	577		chr16		0	0	0	0	0	0	0	0	0	0	0	0	0	0	0	0	0	0	0	0	0	0.0155834	0.0851103	0	0	0	0.023981	0	0	0.0236567	0	0	0	0.150463	0	0	0	0
ACSM3		NM_202000	0.50781	20775311	20797638		NP_973729.1	438		chr16		0.199669	0	0	0	0.115295	0	0	0	0.0655656	0.0232345	0	0.431081	0.151045	0.665558	0.133582	1.31971	0.113143	0	0.0458431	0.168322	1.66764	0.0296967	0.415211	0.0702247	0	0	0.131356	0.381606	0.231656	0	0	0.0894308	0.22184	0.130115	0.432034	0.242544	0	0.101923
ACSM3		NM_005622	0.49219	20775311	20808479		NP_005613.2	586		chr16		0.126007	0.0517362	0.0556584	0	0.168387	0	0.0672724	0.0763638	0	0	0	0.792053	0	1.31272	0.118509	1.48903	0.694159	0.0736304	0.0375923	0	2.18945	0	0.318398	0	0	0	0.123521	0.11212	0	0.0172578	0.0372228	0.103613	0	0	0.491665	0	0.0405021	0
ACSM4		NM_001080454	1	7456927	7480969		NP_001073923.1	580		chr12		0	0	0	0	0	0	0	0	0	0	0	0	0	0.0440276	0	0	0	0.0510466	0.0358101	0	0	0.0235297	0.0976672	0	0	0	0.0528053	0	0	0.0248033	0	0	0	0.108325	0	0	0	0
ACSM5		NM_017888	1	20420855	20452281		NP_060358.2	579		chr16		0	0	0	0	0	0	0	0.0981163	0.0342978	0.0266889	0	0	0	0.0200565	0	0	0	0	0	0	0	0.0400705	0.355141	0.0376637	0	0	0.0304154	0	0	0.0244924	0	0	0	0.208539	0	0	0	0
ACSM6		NM_207321	1	96953956	96988686		NP_997204.2	480		chr10		0	0	0.0552826	0	0	0	0	0	0.0496497	0	0.0273187	0.0504835	0	0.0201709	0.0709577	0.0360066	0.06661	0	0	0	0	0.079293	0.102965	0	0	0	0.108886	0.108979	0	0.0303231	0	0	0	0.110382	0	0	0	0
ACSS1		NM_001252676	0.237013	24986865	25013342		NP_001239605.1	568		chr20		3.30788	0.254332	0	0	3.94585	0.0482531	0.221693	0.0443949	0	0.582641	0.0843161	0	0.290181	0	0.344768	0.691429	2.68242	0.0603029	25.1404	2.26829	0.0818572	4.62685	2.80588	0.147607	0	1.59443	4.1156	0.171429	0.0924428	2.10332	3.17783	3.14661	1.25222	1.51167	1.43313	0.547839	0	0
ACSS1		NM_001252677	0.248725	24986865	25038818		NP_001239606.1	575		chr20		1.26577	0.584722	0.130783	0	3.40827	0.395767	0.270597	0	0	0.18777	0	0.380021	0.128785	0	0.116424	0.493001	0.829193	0	0.725118	5.79956	0	9.8358	3.0211	0.600824	0	0	1.4037	0.423364	0	0	0	0.0582968	0	0	1.08385	0.23597	0.0892837	0.0759312
ACSS1		NM_001252675	0.0667308	24986865	25038818		NP_001239604.1	687		chr20		0	0	0.0990954	0.51952	0	0	0	0	0.128017	0	0	0	0	0	0.303093	0	0	0	0	0	0	0	0	0	0	0	0	0	0	0	0	0.593414	0	2.06817	0	0	0	0
ACSS1		NM_032501	0.447532	24986865	25038818		NP_115890.2	689		chr20		1.16319	0	0	0	0	0.278784	0	0.0857883	0	1.79452	0.917215	0.749237	1.43039	0	2.4182	2.91269	3.11367	0	3.58473	0	0.0703556	0	0	2.05726	0	4.37098	4.33213	1.74718	3.11246	0.614583	5.11731	3.72523	10.1043	0	0	2.00155	0.310183	2.38699
ACSS2		NM_001242393	0.549521	33462765	33515769		NP_001229322.1	606		chr20		0.165528	0	2.23061	6.55542	2.68848	0	5.01079	1.74906	1.58839	3.17769	2.12909	0.687846	6.71595	2.2027	4.58024	0.0356723	5.27158	0.968912	2.36889	0	0	0.124324	0.834359	2.11076	1.0118	3.89729	8.46959	3.13935	3.47125	2.42298	3.23272	11.9464	11.7674	5.83776	0.167693	6.22813	4.06793	4.93163
ACSS2		NM_018677	0.441	33464327	33515769		NP_061147.1	701		chr20		1.50889	2.10602	0.752032	1.88905	2.24341	1.12156	0.228543	1.38528	1.22884	1.21644	0.70506	0.790447	2.70559	2.04457	0.954261	2.08036	6.57225	0.0545157	1.81506	2.03373	3.69096	0.57016	1.43795	0.767753	0.413739	0.584623	1.04131	1.53434	1.4482	1.33172	2.20214	5.79784	2.77568	2.01885	0.807105	3.37565	0.824818	1.74002
ACSS2		NM_001076552	0.00947885	33464327	33515769		NP_001070020.2	714		chr20		0	0	0	0.293816	0.0777972	0	0	0.188624	0.347536	0.0686581	0	0	0	0	0	0	0	0	0	0	0	0	0	0	0	0.04598	0.104016	0	0	0.0542083	0	0	0	0	0	0	0	0
ACSS3		NM_024560	1	81471808	81649582		NP_078836.1	686		chr12		3.2771	0.586808	0.0557301	0.0766072	0.701106	0.375	0.0494019	0.24574	1.00549	0.0717912	0.842884	0	0	0.0104736	0	0	0	0	0	0	0	0.0744661	0.0727201	0.0355776	0.819335	0.0193089	0.879401	3.15585	0	0.0317641	0	0.0497609	3.22639	1.4922	0	0	0.597842	0.329949
ACTA1		NM_001100	1	229566992	229569843		NP_001091.1	377		chr1		1.45315	0.311062	5.68603	2.47276	1.36782	2.21503	3.5905	4.04964	3.31793	2.77664	3.03055	1.61895	1.67567	1.2265	1.16859	1.51267	2.64302	0.474833	2.20797	1.20842	0.769929	2.65157	0.59916	0.873296	1.7382	1.62824	5.81974	1.37065	3.4125	7.84123	1.88966	1.39793	2.31904	1.40805	1.91968	1.7416	2.96881	1.8571
ACTA2		NM_001613	0.601741	90694830	90712580		NP_001604.1	377		chr10		0.290034	0.311705	392.998	20.9406	3.3328	0.154997	3.15376	0.191995	0	92.5058	0.334925	0	0.118066	1.81687	1.20481	0	0.247665	0	0.246617	0	0	0.188465	0	0	2.77153	1.88336	1.14608	0.0800768	0.137724	1.16333	2.17702	3.1297	0.187447	0.236499	0	0.23862	1.07703	4.33381
ACTA2		NM_001141945	0.398259	90694830	90751147		NP_001135417.1	377		chr10		0.275293	0.083674	0.629959	2.57119	1.52255	0.0925792	0.313597	0	0.181493	3.15797	0.107658	0.0675783	0	0.516265	0.625661	0.884822	0	0	0.239645	0.394526	0.120865	0.208663	0.233342	0	1.43067	0.342207	0.112224	0	0	0.20662	1.57344	2.26489	0.445541	0.226419	0.6774	0.0619098	0.303428	1.67932
ACTA2-AS1		NR_125373	1	90692440	90699731		na	na		chr10		0	0.0898683	66.8404	6.46823	0.0913671	0	0.226996	0.0329803	0.112545	3.27037	0.0626283	0.162944	0.195918	0.244209	0.364296	0.185773	0.114622	0.141227	0.150262	0.108893	0	0.2936	0.612705	0.103948	0.162961	0.080495	0.228621	0.0632666	0.0409156	0.164008	0	0.121733	0.23149	0.3953	0	0.342766	0.204173	0.961411
ACTB		NM_001101	1	5566778	5570232		NP_001092.1	375		chr7		1593.91	1847.47	2908.66	1954.84	1835.43	1324.34	5886.07	5309.13	1602.58	2161.91	4631.87	568.04	1605.6	1174.86	1104.16	937.445	1345.31	322.028	4947.65	1702.3	673.596	716.14	334.788	456.316	1192.09	1107.51	2852.07	1444.21	1292.27	2486.99	1527.11	1662.84	1825.68	341.108	891.701	3205.43	2115.87	2263.75
ACTBL2		NM_001017992	1	56775842	56778636		NP_001017992.1	376		chr5		0	0	0.192599	0.0695928	0.0297765	0	0.0537388	0.125559	0.0883785	0.117078	0.258716	0.0315669	0	0.0521678	0	0.0341003	0	0	0.0732086	0.0413114	0	0.0831144	0.268318	0	0	0.0428271	0.975047	0.469837	0.282775	0.432962	0	0.848858	0.702752	0.253436	0.0388817	0.252383	0.104141	0
ACTC1		NM_005159	1	35080296	35087927		NP_005150.1	377		chr15		0.133607	0.0188756	0.669094	0.107932	0.0565196	0.178466	0.138531	1.41719	0.117411	0.136442	0.309759	0.0781937	0.0672484	0.0726189	0.0668359	0.0843991	0.0903786	0.0468435	0.145437	0.083625	0.0471482	0.24912	0.0910782	0.0455755	0.0779649	0.0758055	0.427895	0.0855395	0.178453	0.760827	0.053872	0.0647096	0.040205	0.10441	0.0996029	0.700082	0.138281	0.069274
ACTG1		NM_001199954	0.00240666	79476996	79479892		NP_001186883.1	375		chr17		0.689146	0.114931	2.76502	3.74104	0.956136	8.52913	1.15545	7.25069	2.93675	1.88186	2.14941	1.40072	0.364575	1.20743	0.638861	0.277493	1.10138	0	2.09627	0.121315	0.866417	2.324	0.73658	0	1.70145	1.61654	2.09874	1.31201	0.982775	1.36209	4.15543	2.40715	2.92952	2.05164	3.36514	2.37525	2.20278	2.70002
ACTG1		NM_001614	0.940541	79476996	79479892		NP_001605.1	375		chr17		84.5555	211.228	961.433	524.511	598.539	1098.27	2988.39	2983.96	988.109	934.129	1514.18	583.183	786.373	392.838	350.459	371.828	996.685	56.283	2842.4	369.538	163.291	1193.16	212.594	226.094	974.533	970.113	1232.1	617.295	1294.04	3438.88	1526.07	837.365	1461.06	577.754	848.193	1074.7	2108.14	1288.42
ACTG1		NR_037688	0.057052	79476996	79479892		na	na		chr17		161.297	514.187	0	0	0	3.33063	0	2.76804	0	0	0.346031	0.119698	0	164.125	0	0	0	411.904	1.07018	0	76.2091	0	0	0	0.815459	0.0974012	0	0	0	0	4.08905	0.929848	0	0.116832	0	0.243042	0	0
ACTG1P17		NR_036446	1	83394649	83408532		na	na		chr15		0.29792	0.0565455	0.185923	0.158898	0.144744	0	0.139019	0.273428	0.184208	0.0826976	0.215188	0.0961679	0.0703711	0.13307	0.127124	0.106763	0.0720852	0.145701	0.64603	0.0893941	0.127372	0.227747	0.33638	0.093205	0	0.0770868	0.65237	0.174934	0.148873	0.636001	0.152156	0.106821	0.0770835	0.310909	0.0501352	0.1478	0.102591	0
ACTG1P20		NR_033926	1	27650364	27653016		na	na		chr1		1.7659	0.654205	9.06627	6.55423	1.98285	1.6391	9.61121	4.50278	10.0787	3.8995	5.02965	2.12014	3.25813	2.4945	1.68866	1.97478	4.19672	0.26284	5.76868	1.49858	0.897752	5.35413	2.54723	0.652153	2.79368	4.18624	8.52498	1.97984	5.94578	13.8872	2.75014	1.32922	2.10022	5.77902	2.86679	1.71093	5.80379	1.98409
ACTG1P4		NR_024438	1	104112025	104114008		na	na		chr1		3.06515	0.296045	4.73286	2.20406	1.95809	0.70332	8.36607	2.31182	2.45542	2.9396	3.80435	1.34729	3.0266	1.52719	1.39623	1.62794	3.22313	0.0927612	3.70597	2.08704	0.308987	4.76322	0.835233	0.512738	1.69127	1.82228	9.98753	1.89777	3.90161	11.1759	0.826385	0.844698	1.04443	1.19539	1.64326	1.53241	3.66227	1.05076
ACTG2		NM_001199893	0.420591	74120092	74146780		NP_001186822.1	333		chr2		0	0.049414	71.0287	0.1741	0.0559272	0	0.666467	0	0	2.34345	0.117826	0	0	0	0	0	0	0	0	0.0843036	0	0.46745	0.167885	0.119461	0.0814299	1.10794	0.908437	0	0	0.373425	0	0	0.210344	0.28094	0	0	0	0.10274
ACTG2		NM_001615	0.579409	74120092	74146780		NP_001606.1	376		chr2		0.454612	0	338.122	0	0	0.209028	0.811134	0.738959	0.259883	24.9144	0.5018	0	0.0699451	0.108104	0	0	0	0	0.253125	0	0	0.290369	0	0	0	21.0699	0.271199	0.269583	0.379688	0.803085	0.14875	0.0997377	0.91078	0	0.0863088	0.148204	0.0929973	0
ACTL10		NM_001024675	1	32254303	32256331		NP_001019846.1	245		chr20		1.08646	0	0.496299	1.35373	1.36755	0.223459	0.220009	0.864589	0.208579	0.621222	0.589326	0.255941	1.05241	0.218329	0.872315	0.961606	0.62674	0.338438	0.310433	0.640522	0.342056	0.507332	1.26068	0.905766	0.339218	0.559479	0.48519	0.506732	0.221325	0.264007	0.315054	1.71645	0.982254	0.27406	0.233267	0.556598	0.453871	0.752777
ACTL6A		NM_177989	0.329987	179280667	179306193		NP_817126.1	387		chr3		1.77233	50.7465	0	0	19.5034	0.736368	9.53425	6.40366	0	4.58284	13.8846	3.24602	9.74837	16.605	2.13788	2.38521	2.25042	26.7802	43.5062	10.1662	1.07826	3.19345	7.59911	4.4093	4.26779	4.48689	0	3.38798	0.47929	0	6.38619	11.5784	6.45899	2.60691	0	3.86753	2.67074	4.83623
ACTL6A		NM_004301	0.521091	179280667	179306193		NP_004292.1	429		chr3		5.11274	6.747	3.1472	1.55175	10.0012	2.6954	4.73308	11.2037	0.729704	8.13406	9.70276	8.97145	9.00922	3.72922	3.98775	8.98018	9.03787	3.45508	25.8309	3.43976	10.6857	4.6151	1.03019	6.89717	7.20911	4.778	4.00846	7.18838	6.53384	2.00011	9.10073	10.673	12.0947	0.99065	4.06688	4.51525	6.92453	12.0306
ACTL6A		NM_178042	0.148922	179280667	179306193		NP_829888.1	387		chr3		5.80752	0.275702	1.52216	3.28409	2.37872	1.15049	0.242285	0.549509	2.31549	1.00178	1.33431	3.22319	1.02421	0.492057	0.409644	2.87699	3.71066	0	1.83508	1.39792	0.292169	4.16427	0.65688	1.56914	0.992689	0.447979	2.54375	0.772612	2.70419	2.15347	0.832117	1.14118	1.11944	1.46257	0.482967	0.403306	0.83452	0.416957
ACTL6B		NM_016188	1	100240725	100254084		NP_057272.1	426		chr7		0	0	0	0	0	0	0	0	0	0.0313162	0.0381278	0.0689773	0	0.0688145	0	0.0448741	0	0	0	0	0	0.10396	0.151405	0	0	0	0.098464	0.0353455	0	0.120597	0	0	0	0	0.0664211	0	0.0592754	0
ACTL7A		NM_006687	1	111624507	111626035		NP_006678.1	435		chr9		0	0	0.0876555	0	0.0427501	0	0	0	0.129368	0.044564	0.0460257	0.0633121	0	0.160319	0	0	0	0.098704	0.0423491	0	0	0.128495	0.280122	0	0	0	0.163283	0	0	0.174809	0	0.0728508	0	0.155578	0	0	0	0
ACTL7B		NM_006686	1	111616868	111618275		NP_006677.1	415		chr9		0	0.0651323	0.0685551	0	0.0879654	0	0	0.0478492	0.110881	0.0676217	0.051057	0.152353	0	0.072615	0	0.0587252	0	0.138358	0.0843374	0.0606711	0	0.298374	0.588292	0	0	0.0491474	0.179766	0	0	0.140394	0	0	0	0.219024	0	0	0	0.109392
ACTL8		NM_030812	1	18081807	18153558		NP_110439.2	366		chr1		0.212597	0.0393981	0.123003	0.107368	0.0953012	0	0.168041	0.0534045	0.101372	0.116346	0.0465029	0.0723547	1.61246	0.0685128	0.0945985	0.0462162	0.0551112	0	0.215678	0.761753	0.311749	0.103155	39.7023	7.46487	0	0	0.157207	4.05119	0.0620686	0.0901826	0.0510726	0.607611	0.805422	0.592116	0.152757	0	0	0.0573623
ACTL9		NM_178525	1	8807746	8809180		NP_848620.3	416		chr19		0	0	0.0805595	0	0.0361082	0.155724	0	0.0727185	0.193022	0.0602275	0	0.206345	0	0.0239088	0	0	0.0697023	0.180431	0.0370163	0.14278	0	0.323665	0.575989	0	0	0	0.130958	0.0441359	0	0.186033	0	0	0	0.285972	0.135638	0	0	0
ACTN1		NM_001130005	0.025482	69340839	69446083		NP_001123477.1	887		chr14		0	0	46.0812	0	0.0571075	0.124023	1.50172	4.50232	0	1.21995	0.0595082	0	0	0.279866	0.155925	0	0	0.634126	0	0	0	0.227582	0	0	0	2.17576	1.87831	0	1.35552	0	0.234273	1.6177	1.15412	0	2.33117	0	0	0
ACTN1		NM_001102	0.969335	69340839	69446083		NP_001093.1	892		chr14		25.2741	24.6622	54.1205	39.4082	13.0546	59.5508	50.1858	110.082	26.5942	58.1414	52.1766	29.2573	13.7913	24.236	26.35	12.2525	15.3617	3.64569	3.70801	8.51565	9.36368	2.35777	0.259081	1.00126	51.3444	63.9165	33.9987	118.899	59.972	15.8722	33.2356	78.0466	48.7139	8.08744	23.7773	67.7365	99.9133	39.262
ACTN1		NM_001130004	0.00518298	69340839	69446083		NP_001123476.1	914		chr14		0	0	0	2.4076	0.0932171	0	0	0.255038	0.742873	0.0776795	0.228711	0.154281	0	0.073649	0	0.0531394	0	0	0.0324	0.328868	0	0	0	0	0.721201	0.252634	0.226331	0.418843	0	0.129409	0	0.204647	0	0.460002	0	0.137349	0.0740037	0.311362
ACTN1-AS1		NR_073422	1	69446398	69454180		na	na		chr14		0	0	0	0	0.170335	0.656641	0	0	0	0.11771	0	0	0	0	0	0	0	0	0	0	0	0.190291	0	0	0	0	0.0766142	0.108349	0	0.081827	0	0	0	0	0	0	0	0
ACTN2		NM_001278343	0.435297	236849753	236927927		NP_001265272.1	894		chr1		0.0343342	0	0.124617	0.0831449	0.181329	0.0369476	0.0427636	0.0173613	0	0.0587705	0.11246	0.0247887	0	0.0623363	0.0315707	0	0.0725186	0	0	0.0280582	0	0.0362173	0.0832414	0	0	0.0261477	0.69414	0	0	0	0.145437	0	0.498139	0	0	0.0358102	0.0480564	0
ACTN2		NM_001103	0.478508	236849753	236927927		NP_001094.1	894		chr1		0	0	0	0.0831449	0.181329	0.0369476	0.0427636	0.0173613	0.0735591	0.0587705	0	0.0247887	0.0745118	0	0.0315707	0.122738	0	0	0.0206886	0.0280582	0	0.0362173	0.0832414	0	0	0.0261477	0.496606	0.250611	0.661143	0.14594	0.145437	1.00503	0	0.207395	0	0.0358102	0.0480564	0
ACTN2		NM_001278344	0.0861949	236849753	236927927		NP_001265273.1	686		chr1		0	0	0	0	0	0	0	0	0	0	0	0	0	0	0	0	0	0.0869318	0	0	0	0.0536487	0	0	0	0	0.0245029	0	0.0701532	0.0232633	0	0	0	0	0.0607187	0	0	0
ACTN3		NM_001258371	0.193706	66313865	66330800		NP_001245300.2	944		chr11		0	0	0.0541756	0	0.0556069	0.0391899	0	0.0243237	0.0441085	0.0941586	0.0850191	0	0	0.0903895	0.199741	0	0	0.0761843	0	0.0534118	0	0.101986	0.252365	0.124979	0	0.119566	0.203087	0	0	0.175633	0	0	0.0579203	0.139316	0.0375808	0	0.0745083	0
ACTN3		NM_001104	0.806294	66314311	66330800		NP_001095.2	901		chr11		0.871362	0.0727894	0.220919	0	0.559406	0.111628	0.384862	0.0565486	0.0680991	0.36014	0.280868	0.350413	0.332249	0.22241	0.321845	0.711593	0.391422	0	0.391783	0.292844	0	1.2804	0.108174	0.152287	0.359425	0.049396	0.465152	0.180131	0.329273	0.372983	0.0985574	0.0984356	0.0610587	0	0.415958	0.232494	0.342507	0.134786
ACTN4		NM_004924	1	39138266	39221171		NP_004915.2	911		chr19		56.2101	24.142	122.193	88.5948	30.8756	43.3326	164.569	167.312	90.8432	159.398	127.111	74.4725	95.9437	67.2189	80.9684	99.168	112.553	3.19529	25.3213	29.3371	32.3589	10.2698	6.37495	8.27887	61.4968	60.0015	69.0238	82.5375	141.623	26.4705	43.8447	97.2242	70.3933	14.4128	119.674	109.36	228.577	131.234
ACTR10		NM_018477	1	58666832	58702353		NP_060947.1	417		chr14		3.18336	14.0886	1.6761	1.57882	9.45653	1.7432	3.6264	4.22008	2.83575	5.93764	5.81403	1.92696	4.55951	9.37853	2.09264	1.87899	4.35872	7.66677	11.2334	2.77557	2.06095	2.12021	1.64732	1.03742	3.55369	5.77099	0.967052	2.46511	2.01173	1.60556	6.54424	7.91559	1.57285	1.13049	1.61995	4.63567	2.51777	5.66486
ACTR1A		NM_005736	1	104238985	104262512		NP_005727.1	376		chr10		9.11657	8.83231	10.9163	23.9941	20.5844	7.78954	30.9808	17.7626	14.9476	16.1651	21.5568	8.35728	12.857	16.7233	11.1667	10.078	9.68607	1.57994	40.0946	7.09876	6.94229	16.0236	4.78571	3.53123	14.8213	9.92088	25.9209	16.0964	12.657	15.0774	12.1996	11.863	21.6517	6.10938	8.62309	15.3836	26.5895	22.4852
ACTR1B		NM_005735	1	98272401	98280561		NP_005726.1	376		chr2		5.72205	2.25312	6.65778	3.03679	9.54377	4.39528	13.1432	5.76135	14.1605	10.3564	6.43781	7.11303	8.37289	2.6606	7.57306	7.12871	8.38505	0.532475	31.0905	2.95332	4.03913	13.5035	11.1671	7.0136	7.14575	6.84233	16.284	5.80832	11.9961	2.22401	8.57966	8.93031	17.3453	8.69809	5.08528	12.3132	13.2504	10.7348
ACTR2		NM_005722	0.999573	65454828	65498390		NP_005713.1	394		chr2		7.60167	25.8863	20.1512	6.04207	14.2271	10.7254	11.7365	13.7584	9.82868	12.6878	22.2328	10.3325	12.3996	13.7243	6.82215	13.2869	13.506	15.8364	50.965	38.6587	12.1375	15.5903	7.81963	4.70634	26.3756	16.4321	19.8499	5.58979	9.4091	3.50769	13.0816	14.1877	10.451	8.6992	9.39361	12.6084	8.59881	10.0793
ACTR2		NM_001005386	0.000426591	65454828	65498390		NP_001005386.1	399		chr2		0	0	0	0	0	0	0	0	0	0	0	0	0	0.0931001	0	0	0	0	0	0	0	0	0	0	0	0	0	0	0	0	0	0	0	0	0	0	0	0
ACTR3		NR_102318	0.0300622	114647510	114719129		na	na		chr2		0	0	0.454137	0.360673	0.0518793	0	0	0.0241501	0.327653	0.0783081	0	0	0.0456149	0	0	0.111724	0.158866	0	0.128539	0.687501	0	0	2.22298	0	0.097186	0.0694689	0	0	0.133951	0.0324899	0	0	0.0467398	2.10376	0.17683	0.0589346	0.0357664	0
ACTR3		NM_005721	0.87123	114647510	114719129		NP_005712.1	418		chr2		5.07895	17.5408	12.2406	6.46641	5.06164	6.93986	14.5743	18.9657	7.77968	12.2611	16.5747	6.39849	11.1354	9.2704	5.5518	9.05229	10.6726	3.33269	20.6477	6.2516	7.43154	8.11074	0	3.2063	15.0912	9.92997	7.49288	7.75026	13.8981	9.07348	10.6098	13.3833	14.4702	2.77855	6.01783	14.7704	12.1191	10.119
ACTR3		NM_001277140	0.098708	114648174	114719129		NP_001264069.1	367		chr2		0.113022	13.5739	0	0.222872	0	0.186382	1.06768	0.24758	0.0880224	0.221194	0.538837	0	0.101853	4.81339	0	0	0	14.5429	15.6703	7.12493	0.0426615	0.0556211	3.15582	0.0834814	0.0931684	1.74499	0.138218	0.0614779	0.0413679	0.321702	0.0854109	0.257831	0.0853468	1.47128	0	0.0799337	0.104898	0.0891179
ACTR3B		NM_001040135	0.123322	152456833	152552464		NP_001035225.1	348		chr7		0.227454	0.441848	0	0	0	0.542094	0	0.218789	0	0.1544	0	0	0	0.0262363	0	0.285193	0	3.18796	0.224538	0.662564	0.36393	0.859343	0.344627	0	0	0	0	0.0516797	0	0.142539	0.180359	0.0630976	0.0981989	0.108465	0	0	0.0523999	0.197734
ACTR3B		NR_073001	0.154119	152456833	152552464		na	na		chr7		0.645779	0.310164	0	0	0.304363	0	0.837162	0	0.573732	0	0	0.0945142	0	0.609118	0	0.245977	0	0	0.768818	0.150213	0	0	1.72191	0	0	0	0.504671	0	0	0.86067	0.122361	0.225586	0.313725	0.153053	0	0	0	0.299827
ACTR3B		NR_073000	0.268118	152456833	152552464		na	na		chr7		0.603071	0	0.671778	1.17173	0.102917	0	0.746471	0	0.760741	0.376281	0.547725	0.0979345	0	1.03207	1.59199	1.08475	1.70362	0	1.19811	0.0671921	0.328817	0.848903	0	0.377032	0	0.56838	0	0.295103	0	0	0	0.399278	0	0.221985	0	0.45378	0.51457	1.18284
ACTR3B		NM_020445	0.454441	152456833	152552464		NP_065178.1	418		chr7		0.858513	0	0	0	1.08552	0	0.199221	0.598831	0	0.75885	0.504358	0.654794	2.92036	0.415338	1.11657	1.3041	0.932134	0	0.691859	0	1.68741	0	0	0.448098	0.372538	0.719624	0.283858	1.05342	0.44166	1.23421	1.38292	0.959852	0.835389	0	0.638346	2.19603	1.76203	4.75235
ACTR3BP2		NR_027714	1	92129158	92130496		na	na		chr2		0	0	0.0869745	0	0	0	0	0	0	0	0	0	0	0	0	0	0	0	0	0	0	0	0.20291	0	0	0	0	0	0	0.0445835	0	0	0	0.254077	0	0	0	0
ACTR3BP5		NR_045000	1	38989726	38991371		na	na		chr10		0	0	0.0808752	0	0	0	0	0	0.107232	0	0	0	0	0	0	0	0	0	0	0	0	0	0.215253	0	0	0	0	0	0	0	0	0	0	0.387048	0	0	0	0
ACTR3C		NM_001164459	0.352043	149944300	150000069		NP_001157931.1	210		chr7		1.05799	0.408737	0.24714	0	0.114049	0	0	0.177374	0.121616	0	0	0	0	0.443561	0.623866	0	0	0.876533	0	0	0	0	0.259787	0.587139	0	0	0.0360659	0.435523	0.11653	0.166172	0	0.241425	0.223765	0	0	0.248281	0.410971	0.16231
ACTR3C		NM_001164458	0.647957	149944300	150020758		NP_001157930.1	210		chr7		0.407298	0.0766997	0	0	0.805388	0.149509	0.200341	0	0	0.066651	0.102068	0.631472	1.17275	0.105291	0.614089	3.04237	0.652735	0.685091	0.893114	0.052361	0.773529	1.18203	0	0.232001	0	0.120792	0.176741	0	0.517868	0.265745	0.150544	0	0	0	0.123112	0.381006	0.201443	1.6232
ACTR5		NM_024855	1	37377096	37401089		NP_079131.3	607		chr20		1.49282	1.49384	0.748452	1.61106	2.4421	0.826589	1.70816	0.899136	1.37355	1.86797	1.31824	2.73384	1.45833	3.77593	1.58713	2.83158	1.99478	0.849667	11.6021	0.983368	1.71005	5.39498	0.913493	0.709421	1.7039	1.23856	1.91879	1.87547	1.26708	1.00971	2.2903	2.21459	2.84778	1.04577	1.07767	3.3359	1.20095	1.80127
ACTR6		NM_022496	0.047349	100593864	100618202		NP_071941.1	396		chr12		0.079693	0.14158	0.076214	0	0.0901588	0	0.0471024	0.0494997	0	0.0332487	0.107932	0	0.100396	0.207481	0.0693012	0.121621	0.0672747	0.0874092	0.334078	0.0918994	0.124055	0.0929365	0.151579	0	0	0	0.0442552	0	0	0.0702916	0	0.0875091	0.0607451	0.21391	0.100265	0.113132	0	0
ACTR6		NR_048569	0.553007	100594554	100618202		na	na		chr12		3.43739	6.73944	0.243141	0.773062	2.23154	0.246387	1.51122	0.72178	0.493757	0.769898	1.93617	0.33251	2.0714	5.77221	1.30722	1.25313	3.88541	5.91967	8.7344	2.24578	1.82237	1.89904	0.609275	0.629618	1.18275	1.58815	0.646837	0.889454	0.43445	0.0290471	1.32366	2.43104	1.13717	0.37438	0.227915	0.909566	0.885723	0.774673
ACTR6		NR_048568	0.399644	100594554	100618202		na	na		chr12		1.63808	3.90672	0.758142	0.510376	1.18167	0.556028	0.581632	0.376162	1.18368	0.740293	1.612	0.906432	1.28681	2.94174	0.487708	0.750751	2.12515	1.66209	4.81991	0	1.36918	0.18286	0.707192	0.522832	0.825462	1.39538	0.327418	0.463237	0.690986	0.41136	0.508718	0.817068	0.433999	0.699761	0.970668	0.857776	0.548987	0.317082
ACTR8		NM_022899	1	53901093	53916229		NP_075050.3	624		chr3		1.82302	3.3113	1.34816	1.20392	1.04707	0.507515	2.72243	1.34449	1.7745	1.7594	2.25548	0.663112	1.89016	3.00456	1.87955	1.26335	1.478	2.26144	3.40824	1.42449	1.11153	1.40032	0.96488	0.861763	0.929454	2.74393	1.00512	1.59671	1.72858	1.7776	2.05536	2.78241	1.18778	0.462445	0.825273	2.05835	1.65224	1.49127
ACTRT1		NM_138289	1	127184940	127186382		NP_612146.1	376		chrX		0	0	0	0	0	0	0	0	0.08393	0	0	0	0	0	0	0	0	0.0738222	0	0	0	0.0555762	0.19911	0	0	0	0.0303088	0	0	0.0255377	0	0	0	0.0888203	0	0	0	0
ACTRT2		NM_080431	1	2938045	2939467		NP_536356.3	377		chr1		0	0	0.234893	0	0.0566414	0	0	0.0502311	0.17047	0.0651191	0.046672	0	0	0.0370242	0	0.0514838	0	0.154319	0.0588159	0.0929983	0	0.127812	0.638268	0	0	0	0.119804	0.0343693	0.053327	0.169112	0	0	0	0.108238	0	0	0	0
ACTRT3		NM_032487	1	169484710	169487683		NP_115876.3	372		chr3		0.419379	0.321737	0.442207	0	0.615079	0.106589	0.0417113	0.0660847	0	0.182339	0	0.237707	0.575889	0.83104	0.312979	0.270518	0	0.213858	0.12537	0.078147	0	0.288796	0.382417	0.0473908	0.323274	0.0903425	0.244906	0.0478575	0.471319	0.066451	0	0.133003	0	0.230055	0.288558	0.558019	0.373982	0.709641
ACVR1		NM_001105	0.0206049	158592957	158731623		NP_001096.1	509		chr2		0	0	0.186778	0.206487	0.0760573	0.0752461	0.0736326	0.0692525	0.15757	0.0381665	0	0	0	0	0	0	0.278123	0.0488814	0	0	0.142502	0.0327699	0	0	0	0.0603451	0.136063	0.124892	0.151712	0.06198	0	0	0.112915	0.194849	0	0	0.263541	0.0980687
ACVR1		NM_001111067	0.979395	158592957	158732374		NP_001104537.1	509		chr2		2.2758	5.3285	4.43273	2.34274	1.18616	1.34201	7.87057	10.585	6.26447	4.62003	5.1406	1.04472	3.0885	4.00546	1.55332	2.4076	2.13731	1.10557	2.17543	0.156034	0.606809	0.243156	0.659453	0.570977	5.41422	7.03569	5.84631	5.56703	5.03199	1.07015	5.27278	8.34183	7.18493	2.78796	1.12541	3.60195	4.06291	2.76821
ACVR1B		NM_004302	0.438446	52345450	52390863		NP_004293.1	505		chr12		0	0.219394	0	0.969272	1.47827	0.888105	0.236092	0.85508	0.142095	0.72833	1.15996	0.937345	0.866883	1.18723	0	1.81644	1.88023	0.0740282	0.379807	0.143081	0.866789	0.509073	0	0.488299	1.11131	0.422127	0.379958	1.08621	0.0766414	0.654088	0.628776	1.25996	1.13221	0	0.473235	1.91345	0.909105	0.423468
ACVR1B		NM_020328	0.0219053	52345450	52390863		NP_064733.3	546		chr12		0.121727	0	0.102398	0	0.190207	0	0	0.0686543	0	0.0152096	0	0	0.103795	0.0307115	0.113426	0	0	0	0	0	0	0.0870607	0	0	0	0	0.0493988	0	0	0.05234	0	0	0.0623033	0.136294	0	0.11036	0.0748986	0
ACVR1B		NM_020327	0.539648	52347163	52390863		NP_064732.3	453		chr12		2.29543	0.454627	0.524615	0.250751	2.65444	0.103599	2.43977	0.343394	1.65162	0.467975	0.566809	2.93488	0.999275	1.56988	1.58303	1.16279	0.732984	2.71454	4.48263	1.39698	0	1.41816	0.769887	0.0821871	0.686802	1.13284	1.60004	0.304909	1.04777	1.25929	0.767271	1.1055	0	0.322381	0.993601	0	0.932135	0.942198
ACVR1C		NM_001111031	0.209784	158383278	158454072		NP_001104501.1	443		chr2		0	0	0.0685122	0	0	0	0.0175362	0.0297929	0	0.00668425	0.00838212	0.0215756	0	0.022412	0	0	0.0170057	0.108867	0	0	0	0.00746999	0.0975353	0	0	0	0.0640743	0	0.140539	0.056067	0	0.131912	0.0950118	0.135018	0	0	0	0
ACVR1C		NM_001111033	0.296766	158383278	158485399		NP_001104503.1	336		chr2		0.0302734	0	0	0.0267478	0	0.0511834	0.0147502	0.0298386	0	0	0	0	0	0.0240995	0	0.0107623	0.0606939	0.0516688	0.0185843	0	0	0	0	0.0406561	0	0	0.0118676	0	0	0.0650506	0	0.0230954	0	0.0313956	0	0.0147254	0.00980199	0.0328108
ACVR1C		NM_001111032	0.173637	158383278	158485399		NP_001104502.1	413		chr2		0	0	0	0	0.0150603	0	0	0	0.0299426	0	0	0	0	0	0	0	0.0472653	0	0	0	0	0.0360586	0	0	0	0.127264	0	0.018463	0.0427051	0	0.121015	0.0200382	0	0	0	0	0	0
ACVR1C		NM_145259	0.319814	158383278	158485399		NP_660302.2	493		chr2		0	0.0393454	0	0	0	0	0.0194998	0.0237034	0	0.0380057	0.0296443	0.0239294	0.053677	0.044303	0	0	0	0	0	0.0123408	0.0216383	0	0	0	0.0167161	0.213873	0.136069	0.12185	0.0951239	0.0511965	0.236758	0.0427095	0.140069	0.0861539	0	0	0	0
ACVR2A		NM_001278580	0.0907671	148602085	148688396		NP_001265509.1	405		chr2		0.458499	0	0.104851	0	0	0	0.151063	0	0	0.02741	0	0.087274	0	0	0	0	0.0259998	0	0.21903	0.113576	0	0.0604409	0	0	0	0	0.0184529	0.150251	0	0.0894541	0	0	0	0	0	0	0	0
ACVR2A		NM_001278579	0.115618	148602085	148688396		NP_001265508.1	513		chr2		0	0.128349	0	0	0	0.142134	0	0.185017	0	0	0.033377	0	0	0.347588	0	0.0739031	0.0681404	0.119063	0.0464896	0	0	0.0816884	0	0	0	0	0.0235364	0	0	0.0330689	0	0	0.0352481	0	0.093635	0.0357036	0	0
ACVR2A		NM_001616	0.793615	148602563	148688396		NP_001607.1	513		chr2		0.287741	1.21056	0.453552	0.196997	0.253483	0.169184	0.561145	0.569077	2.52836	1.24481	0.844886	0.396693	0.843834	0.916854	0.771449	0.447889	0.904486	0.911834	0	0.0526037	0.166384	0	0.212609	0.227822	0.619828	0.401159	0.642896	0.502071	0.206371	0.27574	0.641708	0.565188	0.622432	0.832758	0.265677	0.51154	0.62472	0.237533
ACVR2B		NM_001106	1	38495789	38534633		NP_001097.2	512		chr3		1.36733	0.628656	0.221413	0.235642	0.397851	0.280235	0.275696	0.231336	1.18739	0.268318	0.347207	0.264145	0.478197	1.54233	1.50343	0.298485	0.38824	0.985059	1.77583	0.746296	1.50966	1.87985	0.618888	0.388558	0.771824	1.49146	0.737375	1.21952	0.34963	1.0161	1.00659	0.594563	0.556639	0.251172	0.322617	0.372163	0.90681	0.645016
ACVR2B-AS1		NR_028389	1	38492517	38496311		na	na		chr3		0.173349	0.160427	0.164527	0.101023	0.216651	0.126683	0.0623849	0.0658421	0.183067	0.0871805	0.0607584	0.0866728	0.251536	0.0918507	0.177521	0.0802031	0.182977	0.0426244	0.509804	0.0897868	0.0959416	0.616784	0.217908	0.0516511	0.0466772	0.672627	0.161144	0.749207	0.303596	0.270617	0.175314	0.0855868	0.220422	0.295886	0.244395	0.0698522	0.196302	0.182342
ACVRL1		NM_000020	0.911393	52301201	52317145		NP_000011.2	503		chr12		0.0699889	0.0221983	0.093077	0	0.0449995	0.0204366	0.192458	0.0303234	0.0834768	0.0425025	0.035348	0.0211557	0.101054	0.0959349	0.0436732	0.042897	0.0797943	0.096119	0.0670655	0.0597507	0	0.109568	0.158254	0.0160663	0.0408673	0.108722	0.175937	0.278245	0.0652129	0.135122	0.072399	0.0979504	0.0208872	0.160986	0.0487214	0.0779326	0.0580939	0
ACVRL1		NM_001077401	0.0886074	52306112	52317145		NP_001070869.1	503		chr12		0	0	0	0	0	0	0	0	0	0	0	0.0357113	0	0	0	0	0	0	0	0	0	0	0.171159	0	0	0	0	0	0	0	0	0	0	0	0	0	0	0
ACY1		NM_001198896	0.192286	52017299	52023218		NP_001185825.1	336		chr3		6.36371	1.23335	1.54351	1.56684	7.37886	1.04685	0	0	1.31594	0	0	0	0.161687	4.702	0	0.269612	0	0.628212	0	6.09272	0	0.40701	3.47049	0	0	0	3.90201	0	0	0	0.106923	0	0	3.51918	2.06774	0	0.0798053	0
ACY1		NM_001198897	0.0903707	52017299	52023218		NP_001185826.1	343		chr3		3.21328	0.661046	0	0.607969	0.247895	0.158975	0.107759	0.221196	0	0.110084	0.130682	0	0.974283	1.20274	0.522497	0.526176	1.13857	0	0.107935	1.2001	1.10457	0.615862	0	0.124329	0.262157	0.391429	2.90919	0.923622	0	13.394	1.45241	1.17879	0.58362	0.183071	1.18271	0.195724	0.84693	0.766569
ACY1		NM_001198898	0.0922617	52017299	52023218		NP_001185827.1	373		chr3		1.7183	0	0	0	3.79895	0	8.46513	0	1.82115	0.15508	0	2.29557	0.901932	2.9561	0	0.57295	2.19008	0	0.188328	0	0	0	2.05165	0.470703	0	0.15846	0	0.23793	0	0.554531	0.245379	0.738836	0.299091	1.90242	0	0	0.162365	0
ACY1		NM_001198895	0.00962959	52017299	52023218		NP_001185824.1	408		chr3		0	0	0	0	0	0	0	0	0	0	0.6306	0	2.48272	0	0	0	0	0	0	0	0	0	0	0	0	0	0	0.336205	0	0	0.37981	0	0	0	0	0.304849	0	0
ACY1		NM_000666	0.615452	52017299	52023218		NP_000657.1	408		chr3		0.457125	0	0.68641	0	0.450276	1.10223	2.39412	3.1503	0	3.13006	1.25302	5.67853	25.2532	0.337512	5.41192	8.23269	11.2077	0	10.5547	0	9.43428	0	0	5.74869	9.27637	12.0914	8.58782	13.5415	9.89945	23.2035	20.7567	13.7928	19.4365	0.321591	0.303961	4.97797	6.10675	6.45449
ACY3		NM_080658	1	67410025	67418130		NP_542389.1	319		chr11		0	0	0	0.334715	0.210741	0	0.681682	0	0.114345	0.175174	0.0828411	26.5912	2.46869	0.189275	1.60247	1.72511	0	0	1.43839	7.50254	0	1.21269	1.83493	2.6791	0.262727	0.0730855	0.133355	0	0	0.0893976	0	0	0	0.169364	0.758454	0.479438	0.204804	0
ACYP1		NR_126395	0.36058	75519927	75530752		na	na		chr14		4.69472	42.6704	2.09056	7.46863	3.50446	0	0	0.256074	0.832669	0.558846	1.68402	0.535945	2.76712	6.43963	0	3.02734	11.9182	108.208	12.6655	10.8551	5.6733	13.6065	3.2222	1.86634	1.27394	1.39878	2.97086	0	1.51701	1.7477	2.02698	0	0	5.04658	4.8936	0	0.282852	2.22295
ACYP1		NM_001107	0.41789	75519927	75530752		NP_001098.1	99		chr14		0	17.3271	1.14237	1.42457	2.37292	1.26634	2.47979	2.75587	0	7.54187	9.46547	5.01519	1.18039	8.21528	5.06082	4.45261	12.7351	5.87574	37.6503	0	2.25171	1.50288	0	1.44906	1.83228	4.05211	0.957425	2.33723	3.26311	0	10.5692	9.07966	4.72512	0	1.87857	3.88663	1.65494	6.43464
ACYP1		NM_001302616	0.0614008	75519927	75530752		NP_001289545.1	99		chr14		2.56625	0	0	0	0.649368	5.31011	1.09526	0	0	0	0	0	0	2.55845	0	0	0	3.8891	0	0	0	2.78343	0	0	0	0	1.12733	0	0	0.710631	0	0	0	0	0	0	0.892396	0
ACYP1		NR_126393	0.0925799	75519927	75530752		na	na		chr14		0.896963	2.12756	0	0	2.54606	0	0.517606	0.901553	0	0.38809	1.79622	1.91989	0.260866	0.976921	0	0.925407	0.42181	4.89105	3.76366	0	0.594928	1.01444	0	0.46654	0.946967	0.436612	0.172804	0.268264	0.376469	0.0753977	1.08903	1.79976	1.05373	0	0.749561	0.775921	0	0.369452
ACYP1		NR_126394	0.0464826	75519927	75536186		na	na		chr14		0.561022	0	0	0.630718	0.456806	0.588615	0	0.449197	0	0.442048	0.985016	0	0	0.591925	0	0.733062	0	0	0.311126	0	0	0.726107	0	0	0	0.306262	0.398863	0.35802	0	0.599396	0	0	0	0	0	1.25847	0	0.445828
ACYP1		NM_001302617	0.0210661	75519927	75536186		NP_001289546.1	129		chr14		0	0	0	0	0.241353	0	0.409992	0.24803	0	0.240891	0.277943	0.168195	0	0	0	0	0.290746	0	0	0	0	0	0.70687	0.609016	0	0	0	0	0.40754	0	0.673102	0	0	0	0.961949	0	0.189606	0
ACYP2		NM_138448	1	54342409	54532435		NP_612457.1	99		chr2		0.550661	10.4801	0.860094	0.199384	1.3663	1.33731	1.71191	0.821828	2.37421	1.50003	1.98694	0.591494	1.01834	3.70587	0.758619	0.990364	2.34381	11.6234	5.6706	2.37045	0.679999	3.69578	1.31836	0.945723	0.619854	0.915431	0.719009	0.587905	0.766048	0.209251	1.42613	1.27754	1.11599	1.02439	1.03075	2.17734	0.859662	0.944152
ADA		NM_000022	1	43248162	43280376		NP_000013.2	363		chr20		1.65675	0.77628	2.75846	1.08882	0.629607	1.73786	8.56642	4.31734	12.6717	3.4495	3.09623	19.4879	1.28081	8.86419	2.55182	0.83387	1.388	4.07289	560.919	51.0591	1.5775	577.266	6.18374	9.29429	10.6932	1.79445	5.90497	4.17808	2.62475	6.52368	8.30953	18.9769	8.52089	1.50285	6.48071	3.99828	4.08556	3.2755
ADAD1		NM_139243	0.304799	123300120	123350947		NP_640336.1	576		chr4		0	0	0	0	0	0	0	0	0	0	0	0	0	0	0	0	0	0.0603237	0	0	0	0	0	0	0	0	0	0	0	0.0131516	0	0	0	0.0678223	0	0	0	0
ADAD1		NM_001159295	0.695201	123300594	123350947		NP_001152767.1	558		chr4		0	0	0	0	0	0	0	0	0	0.0236767	0	0	0	0	0	0	0	0	0	0	0	0.057846	0.0869567	0	0	0	0.0311561	0.025615	0	0	0	0	0	0	0	0	0	0
ADAD2		NM_001145400	0.645421	84224722	84230772		NP_001138872.1	583		chr16		0	0.0375789	0	0	0	0	0	0	0	0.0841023	0.0407202	0.0660521	0	0.0595519	0	0.0811345	0.0765009	0.106142	0	0.0592775	0	0.138016	0.211031	0	0	0	0.14503	0	0.055823	0.151377	0	0	0.0391947	0	0	0	0	0
ADAD2		NM_139174	0.354579	84224722	84230772		NP_631913.3	665		chr16		0	0	0.0482639	0	0.0951159	0	0	0.0347142	0.0629683	0	0	0.052521	0	0.0227804	0	0	0	0	0.0234961	0	0	0.0638543	0	0	0	0	0.0369993	0.0316666	0	0.0300447	0	0	0	0.10172	0	0	0	0
ADAL		NM_001012969	0.278996	43622553	43641615		NP_001012987.1	267		chr15		0.326997	0.644229	0.118689	0	0.905189	0.270815	0.41887	0.423664	0.563193	0.426666	1.75058	0.520343	0.276964	0.246672	0.265182	0.482349	0.70901	0.520885	3.10604	0.317042	0.32537	0.991134	0.345422	0.207607	0.278197	0.31686	0.271004	0.344562	0.276672	0.163288	1.102	0.367222	0.643939	0.467787	0.11194	0.73471	0.259563	0
ADAL		NM_001159280	0.721004	43622553	43646753		NP_001152752.1	328		chr15		0.923354	1.40465	0.526766	0.227942	1.52432	0.668434	1.30222	1.18873	0.588337	1.16189	3.52806	0.889912	0.561649	0.504308	0.524946	1.05633	0.383692	1.41712	2.43343	1.07026	1.37732	1.75034	0.489575	0.393273	0.518094	1.26143	2.00574	0.874109	0.876158	0.818166	2.52328	1.25127	1.95847	0.694497	0.428609	1.54001	0.701704	0.491902
ADAM10		NM_001110	1	58887402	59042177		NP_001101.1	748		chr15		2.25277	7.81096	3.1743	2.39247	3.3219	3.19423	7.15144	5.575	6.82137	7.42243	9.69864	4.12731	6.68753	10.5652	5.0284	5.73319	4.94929	4.31014	21.8732	4.9234	3.04282	9.27215	5.28418	4.98461	4.66656	8.73767	4.88536	6.22302	5.59909	2.00731	12.7043	8.74977	7.66021	4.70358	2.88207	12.8642	4.81659	6.92589
ADAM11		NM_002390	1	42836567	42859214		NP_002381.2	769		chr17		1.13227	0.0507712	0.143393	0.467891	0.479741	0.0972575	0.519482	0.148697	0.325818	0.193975	0.305334	0.0262612	0.22387	1.08812	0.297467	0.0580658	0.140824	0.0197452	0.136638	0.0607585	0.0469426	0.111889	0.592151	0.572519	0.14527	1.97904	1.01374	0.272021	0.441807	1.87403	1.51666	1.50292	0.641769	0.171598	0.404141	0.625934	0.0784401	0.103746
ADAM12		NM_003474	0.0543465	127700953	128077127		NP_003465.3	909		chr10		0.0180101	0.0107803	0	0.0361226	0	0	0	0.23107	0	0.0260943	0	0	0	0.00497298	0	0.0088692	0	0	0	0	0	0	0	0	0	0	0.234755	0	0.0124775	0.00410139	0.0159914	0	0.0446316	0.0230521	0	0	0	0
ADAM12		NM_001288973	0.742782	127700953	128077127		NP_001275902.1	906		chr10		0.0194324	0.101981	7.00732	4.91576	0.0161884	0.938884	10.6644	39.9984	4.17847	20.9622	24.1102	0.0179689	0	0.0414392	0	0.0328381	0	0.0220743	0	0.0489484	0	0.219231	0.129029	0	0.156203	0.301527	0.00768774	0.125391	0.0128806	0.0598348	0.0531037	2.64884	0.165663	0.25636	0.199989	3.82001	0.539438	0.129017
ADAM12		NM_021641	0.00630347	127729910	128077127		NP_067673.2	738		chr10		0	0	0	0	0	0	0	0	0	0	0	0	0	0	0	0	0	0	0	0	0	0	0	0	0	0	0.178179	0	0	0	0	0	0	0	0	0	0	0
ADAM12		NM_001288975	0.170857	127729910	128077127		NP_001275904.1	735		chr10		0	0	0.346866	0.264307	0.0263765	0.354852	0.587072	1.68949	0.0744634	0.749895	0.684035	0.0572226	0	0.0133854	0	0	0	0	0.0218441	0.165861	0	0.0671841	0.0995207	0	0	0	0	0.090165	0	0	0	0.402939	0.1051	0.0528928	0.0379695	0.280012	0	0
ADAM12		NM_001288974	0.0257114	127729910	128077127		NP_001275903.1	737		chr10		0	0	0	0	0	0	0	0.785559	0	0.0322478	0.379884	0	0	0	0	0	0	0	0	0	0	0	0	0	0	0	0.112714	0	0	0.182415	0	0.0941162	0	0	0	0	0	0
ADAM15		NM_001261466	0.0821283	155023747	155031159		NP_001248395.1	633		chr1		1.79986	0.0457822	0.49861	3.44713	0.784476	0.0626319	0.452991	0.548794	3.23743	1.86483	1.13015	0.448127	2.57752	0.197551	2.12219	0.662794	0.603287	0	0.196121	0.264777	0.429716	0.026923	0.18544	3.03678	0.284736	0.788558	0.91966	1.58263	1.55933	1.84247	0.982874	2.58924	2.14371	0.581288	0.234213	1.43799	1.88687	2.2689
ADAM15		NM_207191	0.132103	155023747	155035252		NP_997074.1	772		chr1		3.51244	0.0440881	0.175199	0	0.0759162	0	2.6184	0	5.51722	9.56196	7.78887	0	15.8427	0	6.42102	0	0	0	1.81826	0.294459	0	0.0994768	0.367851	0	1.33084	0	0	0.541549	10.6727	0	0	0.395689	0.254602	0.342388	1.17862	0	9.92248	0.161188
ADAM15		NM_001261464	0.0581873	155023747	155035252		NP_001248393.1	824		chr1		1.80462	0	0.303389	0	2.38987	0	0	0.180482	0.230763	2.07542	1.14985	0	2.66499	0.415581	0.927287	0.311581	0	0	0	1.97349	0	0.0564462	1.09255	1.89407	0.0814004	0.165358	0.434401	1.1283	1.50805	5.43021	0.255723	0.27673	2.51808	0	0	0.160266	1.49308	0.624699
ADAM15		NM_003815	0.487406	155023747	155035252		NP_003806.3	814		chr1		2.84858	0.0360014	3.1417	13.098	7.07104	2.79359	12.4613	6.32163	2.95574	13.4652	3.41329	2.60256	12.9338	4.94427	7.99353	5.72914	6.59705	0	1.20109	0.418262	3.35018	0	3.89217	25.9056	2.39314	8.14237	4.98599	8.17432	0.0513098	0.136367	15.9346	28.5097	13.2081	2.78732	0.887809	16.8292	12.5235	15.0696
ADAM15		NM_001261465	0.00411153	155023747	155035252		NP_001248394.1	796		chr1		0	0	0	0	0	0	0	0	0.952522	0.114531	0.0883711	0	0.218441	0	0	0	0	0	0	0	0	0	0.799646	0	0.0917872	0	0	0.073633	0.218672	0	0	0	0	0	0	0	0.279254	0
ADAM15		NM_207194	0.0322184	155023747	155035252		NP_997077.1	839		chr1		0.272429	0	0	0.254356	0.756528	0	0	0	0	0.0967416	0	2.77682	0	0.28591	0.0650154	1.24987	0.395222	0	0.5809	0.110393	0.274974	0	0	2.69778	0	0.342879	0.0881588	0	0	0.188671	0.0678773	0.0555675	0	0	1.12752	0.421736	0.515369	0
ADAM15		NM_207195	0.043292	155023747	155035252		NP_997078.1	838		chr1		0.432789	0	0.238764	0	7.43872	0	0.317434	0	0	0.274132	0.319676	1.54318	1.35245	1.09356	0	1.41186	0.2006	0	0	0	0.281052	0	0.253383	3.07803	0	0.316866	0	0.473539	0	0.221243	0.709622	0.703463	0	0	0	0.22367	0.33972	0.809245
ADAM15		NR_048579	0.0745968	155023747	155035252		na	na		chr1		1.33867	0	0.271327	1.35904	6.93249	0	0.623559	0.367913	1.72833	1.19777	1.71262	1.31252	0.746977	0.335586	0.276927	2.00572	0.415286	0	0.523776	0	0	0	0.687648	2.41559	0.0570032	0.98645	2.5087	0.592512	0.559951	1.48595	0.322752	0.617579	2.44143	0.411784	0.755177	0.737181	2.42702	2.97064
ADAM15		NM_207197	0.0180798	155023747	155035252		NP_997080.1	863		chr1		0.379067	0	0	0	3.12792	0	0	0.0810247	0	0	0	0	0	0.514606	0	0.666947	0.280402	0	0	0.172515	0.129428	0	0.143883	0.574384	0	0.0376611	0.182805	0.291323	0	0.164054	0	0	0.22951	0	0	0.279612	0	0
ADAM15		NR_048578	0.0165759	155023747	155035252		na	na		chr1		0	0	0	1.09969	0.297887	0	0.083403	0.107728	0	0.194175	0.264338	0	0.683684	0	1.24812	0.0855745	0.0779373	0	0.447013	0.224146	0	0.0215415	0	0.812058	0	0.0354941	0.287887	1.05637	0	1.01388	0.0614973	0.0548982	0.675399	0.12796	0	0	0	0.582758
ADAM15		NM_207196	0.0247151	155023747	155035252		NP_997079.1	862		chr1		1.03055	0	0	0	4.17479	0	0	0	0.497215	0	0	2.73932	0	0.32635	0	1.02463	0.359102	0	0.0388161	0	0.524353	0	0	1.45918	0	0.254036	0.0634137	1.4289	0	0.0122991	0	0	0.276192	0	0.122017	0	0	0.709438
ADAM15		NR_048577	0.0265856	155023747	155035252		na	na		chr1		0.496824	0	0	0.19946	0.504158	0.0518472	0	0	0.131203	0.399363	0.256346	0.397997	0.847307	0.102116	0.333531	0.141744	0.0980549	0	0.711834	0	0.136174	0.067785	0	1.96979	0.410729	0.226592	0.113741	1.14547	0	0.0520094	0	0	0.900042	0	0.487928	0.22929	0.523705	1.58264
ADAM17		NM_003183	1	9629410	9695917		NP_003174.3	824		chr2		2.40105	7.04494	2.07679	4.00571	1.50647	0.963687	4.72023	5.52261	7.02189	3.32521	5.55456	1.58423	5.10935	5.00726	2.371	3.40542	2.80483	3.44488	5.61631	3.69618	2.35548	2.95176	1.54552	1.13544	5.54455	2.43067	1.26382	4.07773	2.59596	1.50777	3.06818	4.2616	3.43917	1.17591	3.29374	4.13021	6.27842	2.55949
ADAM18		NM_001190956	0.618835	39442086	39469094		NP_001177885.1	182		chr8		0	0	0	0	0	0	0	0	0	0	0	0	0	0	0	0	0	0	0	0	0	0	0.129024	0	0	0	0	0	0	0.0267657	0	0	0	0.12397	0	0	0	0
ADAM18		NM_014237	0.381165	39442086	39587583		NP_055052.1	739		chr8		0	0	0.0449758	0	0	0	0	0	0	0	0	0	0	0	0	0	0	0	0	0	0	0	0	0	0	0	0.0243251	0	0	0.0107734	0	0	0	0	0	0	0	0
ADAM19		NM_033274	1	156904311	157002831		NP_150377.1	918		chr5		0.104823	1.18596	3.91043	2.10359	0.0193519	4.00093	8.61796	9.94529	3.88173	5.07648	29.1269	1.61413	0.0291624	4.79297	0	3.15218	0.0164199	0.981268	0.0145592	0.0413752	0.164544	0.158111	0.616862	0.538586	27.675	0.619467	1.04211	13.2304	2.33687	0.0966434	0.187239	0.737178	0.85195	0.417778	0.305681	1.08334	7.47297	0.187431
ADAM1A		NR_036636	1	112336866	112339706		na	na		chr12		0.954807	0.379565	0.138768	0.383075	0.665888	0.14071	0.484863	0.590211	0.261784	0.310135	0.358132	0.155853	1.2737	0.594788	1.11831	0.973017	0.505717	0.470883	2.23516	0.418272	0.583255	0.8027	0.311695	0.330848	0.224104	0.997773	0.689577	0.578224	0.289103	0.387939	0.484346	0.44493	0.346956	0.171813	0.261828	0.45385	0.46288	0.993508
ADAM2		NM_001278113	0.484726	39601254	39695808		NP_001265042.1	716		chr8		0	0	0	0	0	0	0	0	0	0	0	0	0	0	0	0	0	0	0	0	0	0	0	0	0	0	0	0	0	0.0714303	0	0	0	0	0	0	0	0
ADAM2		NM_001278114	0.515274	39601254	39695808		NP_001265043.1	672		chr8		0	0	0	0	0	0	0	0	0	0	0	0.0282552	0	0	0	0	0	0	0	0	0	0	0	0	0	0	0.0126818	0	0	0.110287	0	0	0	0.044518	0	0	0	0
ADAM20		NM_003814	1	70989077	71001732		NP_003805.3	776		chr14		0.113948	0.0250757	0.0788499	0	0.0541799	0	0.039121	0.0400857	0	0.0607198	0.0260545	0.0367507	0.0348596	0.131054	0.351036	0.0413268	0.0339454	0.0381271	0.0900969	0.0379984	0	0.088312	0.128158	0	0	0.0345688	0.0299701	0.0886089	0.0258155	0.0237016	0.0439223	0.0552523	0	0.169813	0.0479901	0.138171	0.271876	0.103942
ADAM20P1		NR_037933	1	70935595	70950473		na	na		chr14		0.138851	0	0.108336	0.0892824	0.093099	0	0.0532487	0.0374004	0.0385734	0.0703134	0.0373168	0.0342308	0.0363883	0.045219	0.259767	0.0174947	0.0328219	0.0681772	0.230682	0.0348221	0	0.0653555	0.189994	0	0	0.038899	0.0761997	0.0511784	0.0315407	0.0550006	0.0703214	0.0572916	0	0.154206	0	0.106157	0.157692	0.183492
ADAM21		NM_003813	1	70918873	70926622		NP_003804.2	722		chr14		0.0737463	0	0.100094	0.117088	0.0309635	0	0.0376375	0.048563	0.0722733	0.0543448	0.0747153	0.0795509	0	0.555301	0.276611	0.0242441	0	0	0.162045	0.0383116	0	0.114093	0.147489	0	0	0	0.0535326	0.164439	0.100323	0.030356	0	0	0.0513539	0.156196	0	0.0329307	0.0499889	0
ADAM21P1		NR_003951	1	70712469	70714518		na	na		chr14		0	0	0.0957407	0	0	0	0	0.0266756	0.0552562	0.0372892	0	0	0	0.0731502	0.0633648	0	0	0	0	0	0	0	0	0	0	0	0.0127677	0	0	0.0233789	0	0	0	0.0829353	0	0	0	0
ADAM22		NM_021721	0.155551	87563565	87811428		NP_068367.1	823		chr7		0	0	0	0	0	0.0363205	0	0.0317312	0	0	0	0.0588776	0	0	0.0924298	0	0.0434804	0	0	0	0	0.0334845	0	0.282547	0	0	0.112379	0.206228	0	0.310464	0	0.19606	0.176154	0	0.0796331	0.262124	0	0
ADAM22		NM_004194	0.00795259	87563565	87811428		NP_004185.1	859		chr7		0	0	0	0	0	0	0	0	0	0	0	0	0	0	0	0	0	0	0	0	0	0	0	0	0	0	0	0	0	0	0	0	0	0	0	0.0489694	0	0
ADAM22		NM_016351	0.682702	87563565	87832204		NP_057435.2	870		chr7		0.453281	0.296572	0.0603434	0	0	0.0563851	0.152742	0.0832862	0.383092	0.143132	0.0899202	0.207758	0.262969	0.820426	0.270729	0.367245	0.264705	0.86049	1.71341	0.124162	0.0146081	0.946003	0.46134	0.2081	0.171409	0.0612369	0.15646	0.0849665	0.0641768	0.191367	0.0108947	0.053143	0.250486	0.34929	0.0756152	0.423682	0.0233926	0.330231
ADAM22		NM_021723	0.0104424	87563565	87832204		NP_068369.1	906		chr7		0	0	0	0	0	0	0	0	0	0.0125433	0	0	0	0.033386	0	0	0	0	0	0	0	0.0473866	0	0	0	0	0	0	0	0	0	0	0	0	0	0	0	0.13065
ADAM22		NM_021722	0.143353	87563565	87832204		NP_068368.2	899		chr7		0	0.0534749	0	0	0.213888	0	0	0	0	0.117304	0	0	0	0.348252	0.221637	0	0	0	0	0	0	0.0574069	0	0	0.0478549	0	0	0.0372665	0	0	0	0.0763478	0.342324	0	0	0.0547353	0.12752	0.175732
ADAM23		NM_003812	1	207308367	207485854		NP_003803.1	832		chr2		0	0	0.313844	0	0.0141651	0.272705	0.0308244	0.197558	0.286577	4.4977	0.524009	0.0239532	0	0.0290722	0.0924724	0.0197929	0.017788	0.0282857	0.0116962	0.0251145	0	0.0759701	2.53584	4.56719	0.634357	0.0683434	0.11913	0.0505509	3.82623	1.8165	1.65089	3.5126	0.861414	0.356295	0.410762	0	0.210013	0
ADAM28		NR_130709	0.0251215	24151552	24193612		na	na		chr8		0	0	0	0	0	0	0	0	0	0	0	0	0	0	0	0	0	0	0	0	0	0	0	0	0	0	0	0	0	0	0	0	0	0	0	0	0	0
ADAM28		NM_021777	0.103686	24151552	24193612		NP_068547.2	540		chr8		0	0	0	0	0	0	0	0	0.0817028	0.0248346	0.0568837	0	0	0	0	0	0	0	0	0	0	0	0	0	0	0	0	0	0	0	0	0	0	0.0682441	0	0	0	0
ADAM28		NM_001304351	0.392649	24151552	24216531		NP_001291280.1	754		chr8		0	0	0.0393905	0	0	0	0	0	0	0	0	0.0525406	0	0	0	0	0	0	0	0.0166115	0	0.0104506	0.0476	0	0	0	0.00766469	0	0	0	0	0	0	0	0	0	0	0.0154329
ADAM28		NM_014265	0.251499	24151552	24216531		NP_055080.2	775		chr8		0	0.0903782	0	0	0	0	0	0.00839342	0	0.0102639	0.0635465	0	0	0	0	0	0	0	0	0	0	0	0	0	0	0	0	0	0	0.0123671	0	0	0	0	0	0.0490923	0	0
ADAM28		NR_130710	0.227045	24151552	24216531		na	na		chr8		0	0	0	0	0	0	0	0	0.0302755	0	0.0137403	0	0	0.00522678	0	0.0177278	0	0.0174448	0	0	0	0	0	0	0	0	0.0144087	0	0	0	0	0	0	0.0864174	0	0	0	0
ADAM29		NM_001278127	0.533333	175839508	175899331		NP_001265056.1	820		chr4		0	0	0.0589294	0	0	0	0	0	0.0426707	0.0131589	0	0	0	0	0	0	0	0.0247625	0	0	0	0.0433044	0.175694	0	0	0	0	0	0	0	0	0	0	0.152758	0	0	0	0
ADAM29		NM_001130705	0.0666667	175839508	175899331		NP_001124177.1	820		chr4		0	0	0	0	0	0	0	0	0	0	0	0	0	0	0	0	0	0	0	0	0	0	0	0	0	0	0	0	0	0	0	0	0	0	0	0	0	0
ADAM29		NM_001130703	0.4	175839508	175899331		NP_001124175.1	820		chr4		0	0	0	0	0.0147005	0	0	0	0	0	0	0	0	0	0	0	0	0	0	0	0	0	0	0	0	0	0.0216422	0	0	0.0190366	0	0	0	0	0	0	0	0
ADAM30		NM_021794	1	120436155	120439147		NP_068566.2	790		chr1		0.0479951	0.0173179	0.115095	0	0.0134804	0	0.0472375	0.0342347	0.367392	0.154088	0.0493723	0.0425323	0.0388951	0.0219113	0	0.0291207	0.172948	0.0582297	0.0927382	0	0.0451429	0.0553951	0.198602	0	0	0	0.0912918	0.0609389	0	0.0714089	0.0357088	0	0	0.201122	0.041023	0	0.0330077	0
ADAM32		NM_145004	1	38965049	39142436		NP_659441.3	787		chr8		0.0871164	0.0375859	0.112257	0.114235	0.0182014	0.0725541	0.116271	0.115693	0.0574203	0.120468	0.163825	0.0585176	0	0.190933	0.0899611	0.0471105	0.0608917	0.0495296	0.0330456	0	0	0.0388945	0	0	0.0989922	0	0.0753488	0	0	0.042362	0	0.0410755	0	0.0582717	0.0568699	0.218207	0.115351	0.082463
ADAM33		NM_153202	0.808779	3648619	3662778		NP_694882.1	787		chr20		0	0.0363062	0.351198	0	0.0156267	0	0.0246028	0.0429167	0.111493	0.0923777	0.0158395	0.0274664	0	0.0205756	0	0.0540572	0.0276674	0.0354371	24.9436	0.0325624	0	3.04116	0.280712	0.144243	0	0.0185617	0	0	0	0.0289231	0.0263625	0	0	0.12142	0.0333038	0.0310199	0	0
ADAM33		NM_001282447	0.141182	3648619	3662778		NP_001269376.1	812		chr20		0	0	0	0	0	0	0	0	0	0.108005	0	0	0	0	0	0	0	0	19.811	0	0	0.196371	0	0	0	0	0.139411	0	0	0.0467335	0	0	0	0	0	0	0.0376197	0
ADAM33		NM_025220	0.0500387	3648619	3662778		NP_079496.1	813		chr20		0	0	0.334774	0	0	0	0	0	0	0.016392	0	0	0	0	0	0	0	0	0.341952	0	0	0.0253479	0	0	0	0	0.0188672	0	0	0.0223132	0	0	0	0	0	0	0.0341831	0
ADAM3A		NR_001569	0.538462	39308563	39380508		na	na		chr8		0	0	0	0	0	0	0	0	0	0	0.0302717	0	0	0	0	0	0	0.0653299	0.0196665	0	0	0.0180745	0	0	0	0	0	0	0	0.0274909	0	0	0	0	0	0	0	0
ADAM3A		NR_024107	0.230769	39308563	39380508		na	na		chr8		0	0	0	0	0	0	0	0	0	0	0	0	0	0	0	0.0180107	0	0	0	0.0302125	0	0	0	0	0	0	0.0212208	0	0	0	0	0	0	0	0	0	0	0
ADAM3A		NR_073423	0.230769	39308563	39380508		na	na		chr8		0	0	0	0	0	0	0	0	0	0	0	0	0	0	0	0	0	0	0	0	0	0	0	0	0	0	0	0	0	0	0	0	0	0.0691303	0	0	0	0
ADAM5		NR_001448	1	39172181	39260375		na	na		chr8		0	0	0	0	0	0	0	0	0	0	0	0	0	0	0	0	0	0	0	0	0	0.0751109	0	0	0	0	0.0601158	0	0	0.032441	0	0	0	0.101082	0	0	0	0
ADAM6		NR_002224	1	106435817	106438358		na	na		chr14		0	0	0.0970544	0	0	0	0	0.029546	0.122318	0	0	0.0466798	0	0.0262452	0	0	0	0.0479667	0	0.0548215	0	0.132468	0.0950923	0.0672833	0	0	0.0728203	0	0	0.0931686	0	0	0	0.292374	0	0	0	0
ADAM7		NM_003817	1	24298508	24367077		NP_003808.2	754		chr8		0	0	0.0557644	0	0	0	0	0	0	0	0	0.0356109	0	0.0113096	0	0	0	0	0	0	0	0.0208142	0	0	0	0	0.0193184	0	0	0.0162736	0	0	0	0	0	0	0	0
ADAM8		NM_001164490	0.361187	135075919	135090407		NP_001157962.1	733		chr10		0.565214	0.946553	0.0972253	0.127802	0.240319	0.0752619	0.253604	0	0.0598453	0	0	0	0.0660731	0.19733	0	1.31579	0.315994	0.266448	0.220731	0.640798	0.278256	0.0941808	2.99698	0.0782586	0	0	0.0558684	0	0	0.115521	0.0319158	0	0	0.111111	0	0	0	0
ADAM8		NM_001164489	0.318104	135075919	135090407		NP_001157961.1	742		chr10		0.277012	0.447102	0	0	0.29121	0	0.304136	0	0	0	0.0469582	2.30865	0.206119	0.0410842	0.658094	1.18902	0.0605523	0	0.262249	0.302744	0.130957	0.0912823	0.312513	0.354058	0	0.178215	0	0	0	0.163584	0	0.094096	0.196523	0	0.332612	0.23433	0.319849	1.9637
ADAM8		NM_001109	0.320709	135075919	135090407		NP_001100.3	824		chr10		0	0	0	0	0	0	0	0.129069	0.0756157	0.382333	0.131907	3.291	0.222025	0	0.184051	1.11767	0	0	0	0	0	0.0501593	0	0.095122	0.0571566	0.16915	0.275807	0.195544	0.161752	0.0216756	0	0	0	0	0.063037	0.0820313	0.869996	8.8299
ADAM9		NR_027639	0.0996849	38854504	38962779		na	na		chr8		0	0.0810648	0.723996	5.053	0	0.300352	0	0.044011	3.40968	0	0	0	0	0.272481	0	0.0922492	0	1.93959	0	0.643338	0	0.416165	1.19971	0	0	0.0434262	0	0	0	0	0	0	0	1.20488	0	0	0	0
ADAM9		NR_027638	0.0173106	38854504	38962779		na	na		chr8		0	0.0468332	0	0	0	0	0	0.0522824	0	0.0359675	0.0718467	0	0	0	0	0	0.113394	2.07413	0.0323793	0	0	0.0480789	0	0	0	0	0	0	0	0	0	0	0	0	0	0	0	0.0559307
ADAM9		NR_027878	0.007057	38854504	38962779		na	na		chr8		0	0	0.848514	0	0.223404	0	0.0668591	0.134458	0.47809	0.0323207	0	0	0	0.243908	0	0.125208	0	0	0.102672	0	0	0	0	0.0946382	0.0771917	0	0	0	0	0	0	0	0	0	0	0.153702	0.0426412	0
ADAM9		NM_003816	0.875947	38854504	38962779		NP_003807.1	819		chr8		0.648673	9.10178	11.5032	16.0577	9.12718	4.73081	11.9478	14.2213	5.41046	12.7834	19.4941	3.61703	8.75775	9.27933	8.59893	9.8745	16.4057	0.278565	3.48334	0.21236	1.85232	0.431134	0	1.17196	8.93271	10.7644	1.52436	4.6872	2.97103	2.96948	2.56972	7.35439	2.98593	0.495351	6.33558	13.1608	22.4721	7.58588
ADAMDEC1		NM_001145272	0.785714	24241797	24263526		NP_001138744.1	391		chr8		0	0	0.0541532	0	0	0.0362834	0	0	0	0	0	0.0290179	0	0	0	0	0	0	0	0	0	0.0235238	0	0	0	0	0	0	0	0.0280277	0	0	0	0.0831749	0	0	0	0
ADAMDEC1		NM_014479	0.142857	24241797	24263526		NP_055294.1	470		chr8		0	0	0	0	0	0	0	0	0	0	0	0	0	0.0143004	0	0	0	0	0	0	0	0	0	0	0	0	0.0399038	0	0	0	0	0	0	0	0	0	0	0
ADAMDEC1		NM_001145271	0.0714286	24241797	24263526		NP_001138743.1	391		chr8		0	0	0	0	0	0	0	0	0	0	0	0	0	0	0	0	0	0	0	0	0	0	0	0	0	0	0	0	0	0	0	0	0	0	0	0	0	0
ADAMTS1		NM_006988	1	28208605	28217728		NP_008919.3	967		chr21		0.0381521	0.0349851	15.7249	1.21155	0.0549217	3.28517	3.60776	12.7363	0.249749	7.90042	0.700862	0.0348705	0	0.0428658	0.0199598	0.0296819	0.0310877	0.0787024	2.95363	0.288945	0	0.261238	0.249838	0.0525002	6.59556	0.518643	1.89478	3.50523	0.987555	2.39763	0.921551	8.67771	1.44733	0.389052	0.0736811	0.943241	9.57481	0
ADAMTS10		NM_001282352	0.86883	8645123	8657080		NP_001269281.1	590		chr19		0.793595	0.161288	1.02919	0.502564	0.768449	0.619665	0.566123	1.08047	1.62734	2.79856	0.888215	0.456479	0.373135	0.776733	0.568098	1.1676	0.775276	0.258234	3.01904	2.5257	0.213523	2.04893	1.66015	0.618837	0.325447	0.360888	1.1493	0.492467	0.725908	0.668307	0.517111	0.229476	0.314133	1.30038	1.60933	1.31171	0.443262	0.217851
ADAMTS10		NM_030957	0.13117	8645123	8675620		NP_112219.3	1103		chr19		0	0.019084	0.166078	0.335816	0.046318	0.0744519	0	1.2226	0.385073	1.59063	0.302395	0	0	0.27134	0	0	0.0211237	0.0588168	0.222766	0.0254586	0	0.0778252	0.202134	0	0.0677267	0	0.0552153	0	0	0.060227	0	0	0	0.0984954	0.450475	0.901563	0.133139	0
ADAMTS12		NM_030955	1	33527286	33892124		NP_112217.2	1594		chr5		0.0478527	1.8289	5.01292	1.15444	0.0180507	1.33092	0.226708	0.414264	0.123523	3.10239	0.532285	0.0208488	0.0403087	0.0324591	0.0474059	0.0495882	0.0301753	0.0193847	0.0162867	0.02921	0	0.108671	0.10417	0	1.25348	0.0204364	0.0983643	0.0549886	0.0694481	0.180909	0.0802501	0.0272629	0.0301548	0.195365	0.372991	0.0756885	28.2773	0.395151
ADAMTS13		NR_024514	0.296221	136279458	136324525		na	na		chr9		0.0980978	0	0	0	0.259554	0.0455975	0.0441945	0.0743172	0	0.282731	0.0248958	0.0864937	0.0998028	0.203534	0.177042	0.027062	0.142175	0	0.0828876	0.0734719	0	0.0824111	0.25289	0.0943429	0	0.140825	0.0541265	0.087323	0.131152	0.0345554	0.0750733	0.126325	0.0703732	0.0570902	0	0	0.0978004	0.121418
ADAMTS13		NM_139027	0.136024	136287119	136324525		NP_620596.2	1371		chr9		0	0	0	0	0	0	0.033585	0	0	0	0.0380273	0.120315	0	0.0318793	0	0.102105	0	0	0.0581111	0.0239439	0	0.0376005	0	0.130419	0	0	0	0	0	0.195447	0.0448626	0	0.0357091	0	0	0.0525746	0	0.3495
ADAMTS13		NM_139025	0.480783	136287119	136324525		NP_620594.1	1427		chr9		0.0949092	0.018059	0.077514	0.278117	0.333064	0.0349474	0.0784538	0.194387	0.123503	0.629132	0.013643	0.038437	0.182327	0.206503	0.410137	0.0348843	0.157793	0.0268578	0.0410525	0	0.0370137	0.196259	0.483426	0	0.0492259	0.213526	0.338488	0.122524	0.170292	0.105265	0	0.308263	0	0.124965	0	0	0.0901949	0.17529
ADAMTS13		NM_139026	0.0869722	136287119	136324525		NP_620595.1	1340		chr9		0.239041	0	0	0	0.257464	0	0.0216398	0.0343933	0	0	0	0	0	0.0181655	0	0	0	0	0.0599553	0	0	0	0	0	0	0.0264405	0	0	0	0	0	0	0.0414462	0	0.122336	0.0485603	0	0
ADAMTS14		NM_080722	0.845432	72432558	72522195		NP_542453.2	1223		chr10		0.0713431	0.0177818	0.151548	0.244007	0.03747	0	0.305799	1.35282	0.313535	0.496523	0	0.0419541	0	2.92436	0.077302	0.0981038	0	0.102426	0	0.119221	3.7966	0.108336	0.162965	0.0222585	0	0.0198776	0.298367	0	0	0.293474	0.0414781	0.028962	4.39461	0.284306	0	0.120938	0	0.268621
ADAMTS14		NM_139155	0.154568	72432558	72522195		NP_631894.2	1226		chr10		0	0	0.343644	0	0	0	0	0.372004	0.718293	0.727538	0.224131	0	0	0	0	0	0	0	0	0	0.795158	0	0	0	0	0	0	0.020479	0	0	0	0	1.83378	0	0	0	0.0865901	0
ADAMTS15		NM_139055	1	130318868	130346539		NP_620686.1	950		chr11		0.0696417	0.969927	0.312875	1.44181	0.837382	0.0362373	0.236028	1.02338	1.40568	2.81456	4.06209	0.30302	0.0187484	0.0699808	0.10921	0.0447564	0.359647	0.0582004	0.0796174	0.0676539	0	0.398858	0.251279	0.019986	0.0191589	0.0245484	0.0871323	0.283929	0.0157267	0.0880813	0.026148	0.0666365	0	0.183554	0.105778	1.97996	0.533664	1.25572
ADAMTS16		NM_139056	1	5140442	5320412		NP_620687.2	1224		chr5		0	0.35759	0.200928	0.273728	0.0106504	0.177571	0.395356	1.31985	1.77208	3.07174	2.22184	0.025114	0.0229382	0.1295	0	0.0228211	0.027053	0.0239814	0.0209642	0.0425074	0	0.0857428	0.194092	0	0.199137	0.0588684	0.130135	0.0513261	0.0266226	0.0703044	0.0913326	0	1.01288	0.266617	0.164113	0.919897	1.10749	0.829017
ADAMTS17		NM_139057	1	100511642	100882183		NP_620688.2	1095		chr15		0.174308	0.0809343	0.0728315	0.0656038	0.0383305	0.0497066	0.0525282	0.0670398	0.0987467	0.0420071	0.0591839	0.881019	0.113347	0.196485	0.112058	0.0496683	0.0430419	0.401393	1.31633	0.290078	0	1.2581	0.671869	0.952794	0.0442238	0.481175	1.51939	0.314753	1.32595	0.724791	0.0803091	0.746094	0.0137581	0.22513	0.0382025	0.0592414	0.111524	0.180414
ADAMTS18		NM_199355	1	77316024	77469011		NP_955387.1	1221		chr16		0	0	0.0549206	0.0319798	0.0192483	0	0.0732715	0.0193277	0.0465392	0.0379574	0.0190321	0.043847	0.0278478	0.0241239	0	0.021886	0.0273188	2.54514	0.020633	0.0244521	0	0.0754476	0.167363	0	0.612539	0.0111028	0.111757	0.0152655	0.0205081	0.04898	0	0	0.0140273	0.0865054	0.0409214	0.0196105	0.0374856	0
ADAMTS19		NM_133638	1	128796102	129074376		NP_598377.4	1213		chr5		8.32077	0	0.0452469	0	0.0339452	0.0145046	6.81792	0.0161286	0.0435366	0.00852769	0.0141832	0.0247174	0	0.020055	0	0	0.0136646	0.205617	0.103478	0.0179905	0	0.142676	0.0621037	0.0189942	0	0	0.0419927	0	0	0.0355159	0	0.0271042	0	0.112619	0.021139	0	0.0174896	0
ADAMTS19-AS1		NR_125748	1	128795251	128796382		na	na		chr5		7.32045	0	0.213912	0	0.164824	0	7.2269	0	0.119978	0	0	0	0	0.0384972	0	0	0	0	0.0825516	0	0	0.311754	0	0	0	0	0.0433006	0	0	0.0914672	0	0.24247	0	0	0	0	0	0
ADAMTS2		NM_014244	0.574466	178537851	178772431		NP_055059.2	1211		chr5		0.0317632	0.0293552	4.52085	0.324385	0.0170487	0.0229932	0.52698	25.7943	0.0733569	19.0697	0.0195112	0.0274738	0.0609525	0.108254	0	0.0170024	0.0149596	0.137955	0.024767	0.0243927	0	0.131871	0.129606	0.451793	0.0199371	0	0.0999382	0.0744402	0.0208089	0.0875488	0	0.0192019	0	0.139468	0.037725	0.0127059	0.152011	0
ADAMTS2		NM_021599	0.425534	178577885	178772431		NP_067610.1	566		chr5		0	0	1.48077	0.31762	0	0.141815	0.320364	8.96646	0.0604868	3.63307	0.0306335	0.131642	0	0.205335	0	0.0547068	0.0633294	0.14897	0	0.0799691	0	0.154746	0	1.09346	0	0	0.164759	0.291676	0	0.0968668	0	0	0	0	0.0858847	0	0.49064	0
ADAMTS20		NM_025003	1	43748011	43945724		NP_079279.3	1910		chr12		0.0568345	0.00906539	0.0228823	0	0.0553986	0	0.015386	0.00747015	0.0335785	0.0112446	0.113106	0.0153407	0	0.0130725	0	0.013686	0	0.0457793	0	0.0290315	0	0.0337021	0.0915819	0.0727466	0.0395825	0	0.0815441	0.0938593	0	0.0388826	0	0.0151968	0	0.10036	0	0	0	0
ADAMTS3		NM_014243	1	73146685	73434516		NP_055058.2	1205		chr4		0.0212962	0.0168036	0.0758662	0.16571	0.0281663	0.115341	0.0739963	0.474623	0.142311	0.0171174	0.147575	0.0131955	0.0162919	0.00839957	0	0	0	0	0.031083	0.0905313	1.35958	0.0324292	0.0882489	0	0.0648729	0.0177452	0.205844	0.0191032	0.0783947	0.03347	0.0628324	0.0242984	0.842567	0.226195	0	0.460788	0.616954	0.415281
ADAMTS4		NM_005099	1	161159537	161168845		NP_005090.3	837		chr1		0.326561	0.0305206	1.78567	5.2783	0.472873	0.0785075	0.125501	0.0784476	0.464377	3.35197	4.49453	0.287411	0.100565	0.20484	0.195445	0.414718	0.334665	0.0314226	0.312591	0.305569	0.155487	0.511951	0.531293	0.0597398	0.0910116	1.80447	0.205273	0.0919822	0.164865	0.116977	0.225704	0.138722	0.0722372	0.224488	0.0883675	0.0662035	0.102016	0.05157
ADAMTS5		NM_007038	1	28290230	28339439		NP_008969.2	930		chr21		0	0.0151951	1.86659	0.0659052	0.0113545	1.84169	0.0850958	1.41868	0.0374546	3.65832	0.0166736	0.0420337	0.0161671	0.0168977	0.00968688	0.015384	0.00796517	0.0512618	0.00980511	0.0384184	0.0244208	0.0639413	0.136704	0.016907	0.158809	0.0126407	0.0871596	0.0219561	0.0164333	0.0857302	0.00965607	0.0166682	0	0.158905	0.0161282	0	0.203183	0
ADAMTS6		NM_197941	1	64444562	64777704		NP_922932.2	1117		chr5		0.0898428	1.33365	1.08971	1.44774	0.0216626	0.579184	0.719721	1.65341	0.0833252	0.317189	0.159497	0.0849092	0.0233296	0.114485	0.0191706	0.716642	0.0675045	0.0630466	0.16422	0.0305229	0.0744196	0.241215	0.139922	0.0129811	3.39605	0.00897073	0.0534279	0.11624	0	0.115589	0.0274506	0.0250135	0.0282134	0.145044	0	0.0570664	0.896524	0.550696
ADAMTS7		NM_014272	1	79051544	79103773		NP_055087.2	1686		chr15		0.0798713	0.0598856	0.883265	0.044517	0.429204	0.228143	0.295704	1.63162	1.37762	1.02096	0.565392	0.0764519	0.0522253	0.574407	0.219231	0.0755716	0.0473179	0.109213	0.068661	0.0971468	0.0967957	0.187759	0.335103	0.113764	0.0614842	1.38872	0.356871	0.166494	0.119234	0.260946	0.88741	0.27221	0.0550591	0.219158	0.199513	0.177901	0.612593	0.0256961
ADAMTS7P1		NR_045529	1	82585620	82626915		na	na		chr15		0	0	0.0733166	0	0.0326996	0.0247669	0.0408199	0.0508977	0.111933	0.0636961	0.0219346	0.0310073	0	0.0294776	0	0.0225678	0.0505518	0.0473971	0.0291436	0.0328894	0	0.0869614	0.182597	0.0392882	0	0.0458358	0.0724557	0.0164742	0	0.0577154	0.026672	0.0167897	0	0.129625	0.0262842	0	0.0213888	0
ADAMTS8		NM_007037	1	130274817	130298539		NP_008968.4	889		chr11		0.0534305	0.0563923	0.0673171	0.0746933	0.0898345	0.0780029	0.0533081	0.0741451	0.0794821	1.08241	0.0569246	0.0788103	0	0.0642505	0.0365658	0.0592129	0.110256	0.0931405	0.0273304	0.0591646	0.0516291	0.281856	0.179116	0.0615113	0	0.0290288	0.0946498	0.0389526	0.033228	0.0833149	0.0295372	0.0563465	0.035795	0.200931	0.123848	0.363591	0.0221761	0
ADAMTS9		NM_182920	1	64501330	64673365		NP_891550.1	1935		chr3		0	0.340249	0.0604235	0	0.0101474	0	0.0311887	0.0492163	0.871144	2.07209	0.129343	0.213688	0	0.0161909	0	0.0205654	0.0162486	0.12069	0.00790886	0.035569	0.0785354	0.0447971	0.146138	0.016649	0.351722	0.00885644	0.989455	1.87855	1.65251	0.116822	0.350427	1.80939	0.446142	0.180736	0.694964	2.27056	0.318788	0
ADAMTS9-AS1		NR_110151	0.732407	64547021	64575760		na	na		chr3		0	0.0272474	0.0513525	0	0	0	0	0	0.0419279	0.0832199	0	0.017433	0	0	0	0	0	0	0	0	0	0.0528284	0	0	0	0	0.123439	0.0478602	0.100843	0.0312197	0.0433992	0.0248349	0.0574514	0.100589	0.052034	0.0344858	0	0
ADAMTS9-AS1		NR_110150	0.267593	64547021	64575760		na	na		chr3		0	0	0	0	0	0	0	0	0	0	0.0181512	0	0	0.00681095	0	0	0	0	0	0	0	0	0.110753	0	0	0	0	0	0	0.0243539	0	0	0	0.0958592	0	0	0	0
ADAMTS9-AS2		NR_038264	1	64670545	64997143		na	na		chr3		0	0.0354411	0.11675	0	0	0	0	0	0.107296	0.141039	0.0465202	0.047685	0	0.0253	0	0	0	0.0454121	0	0	0	0.0274064	0.155069	0	0	0	0.115342	0.0246214	0.0588989	0.0755893	0	0	0	0.1665	0	0.0704677	0	0
ADAMTSL1		NM_052866	0.16988	18474078	18684952		NP_443098.3	525		chr9		0	0.269075	0.138344	0	0	0.748135	0.0634895	0	0	0.37892	0.744611	0.087322	0	0	0	0	0	0	0	0	0	0.0235599	0	0.0699927	0	0	0	0	0	0.0396023	0	0	0	0	0	0	0	1.02079
ADAMTSL1		NM_001040272	0.83012	18474078	18910947		NP_001035362.3	1762		chr9		0.0320937	0.886092	0.846514	0.679844	0.0186523	0.930378	0.780371	0.0146941	0.676113	6.31858	1.22953	0.0223015	0.0112749	0.0210629	0	0.0184496	0.0195249	0.0592924	0.0293223	0.0337758	0	0.146183	0.151189	0.0111762	0.0383259	0	0.0587632	0.137013	0	0.0484326	0	0.01165	0	0.177312	0.0149481	0	0.127386	7.26334
ADAMTSL2		NM_001145320	0.43902	136397285	136440641		NP_001138792.1	951		chr9		0	0	0.0754849	0	0.0418139	0	0	0.0211952	0.113976	0.0348809	0	0	0	0.0254047	0	0.0649439	0	0	0	0.0363035	0	0.0428317	0.287431	0.0528587	0.0237266	0.0289949	0.0802181	0	0.0323218	0.0931318	0	0	0	0.0889194	0.0201061	0	0	0
ADAMTSL2		NM_014694	0.56098	136399974	136440641		NP_055509.2	951		chr9		0	0.0373963	0	0	0	0	0.0233446	0	0	0.199779	0.0277111	0.0403831	0.117524	0.0468733	0.0493353	0	0.0418118	0.115394	0.334638	0.0463837	0	0.137467	0	0.634026	0	0	0.0583583	0.155353	0	0.223326	0.0431787	0	0	0	0	0.101853	0.041094	0
ADAMTSL3		NM_207517	0.159225	84322837	84708593		NP_997400.2	1691		chr15		0	0.00891031	0	0	0	0	0	0	0	0	0.0178242	0	0	0	0	0	0	0	0	0	0	0	0.14604	0	0	0	0	0	0	0	0	0	0	0	0	0.675051	0	0
ADAMTSL3		NM_001301110	0.840775	84322837	84708593		NP_001288039.1	1682		chr15		0.437579	0	0.0498072	0	0.0248613	0.0137638	0.0257049	0.0193791	0.0622291	0.0505595	0	0	0	0.0111017	0	0.0122324	0.0107141	0.0425953	0.00901693	0.0106979	0	0.0556246	0	0	0	0.01736	0.0355276	0.0178432	0.014221	0.0421856	0	0.0125639	0	0.134835	0	0	0.23785	0
ADAMTSL4		NM_025008	0.101742	150521844	150531224		NP_079284.2	877		chr1		0	0.0436613	0.17533	0.175262	0.0658147	0	0	0.107878	0.037858	0.0431073	0.048448	0	0	0.0578145	0	0	0	0	0	0.0802914	0.28599	0.0379615	0.13603	0	0	0.0510321	0.0147785	0.0346991	0	0.282424	0	0	0.0398122	0	0	0.156022	0.0299262	0
ADAMTSL4		NM_019032	0.487164	150521844	150533412		NP_061905.2	1074		chr1		0	0.249292	1.21828	1.52594	0.934387	0	0	0.181151	0.117404	0.312991	0.0990055	0	0	0.335257	0.165162	0	0	0	0.0657201	0	16.1653	0.028657	0.140556	0	0.25227	0.165289	0	0.297047	0.105215	0	0.087302	0.283948	0	0.153044	0.2407	1.99144	0.587329	0.437937
ADAMTSL4		NM_001288607	0.391075	150521844	150533412		NP_001275536.1	1035		chr1		0.273555	0.294789	1.33452	0	0.732513	0.0579956	0.221728	0.360525	0	0	0.114241	0.0263461	0.105585	0.0146597	0.056679	0.0600083	0.32837	0	0.0546278	0.0920893	0	0	0.263754	0	0	0.234535	0.332603	0.0773961	0.035787	0.264187	0	0.136897	0.143736	0	0	0	0.558797	0.266562
ADAMTSL4		NM_001288608	0.020019	150521844	150533412		NP_001275537.1	1097		chr1		0	0	0	0	0	0	0	0	0	0	0.0220886	0	0	0	0	0	0	0	0	0	0	0	0	0.0206011	0	0	0.0400124	0	0	0	0	0	0	0	0	0	0	0
ADAMTSL4-AS1		NR_104133	1	150533370	150547028		na	na		chr1		0	0.192905	0.240147	0	0.197643	0	0.133252	0.352312	0	0.127571	0.0856056	0	0	0.131432	0.124371	0.0827589	0.14969	0	0	0.0984349	0.338686	0.0662774	0.352976	0.104347	0	0.120551	0.372144	0.233613	0.112936	0.039565	0	0.13921	0.129922	0.20814	0	0.171077	0.234312	0.199771
ADAMTSL5		NM_213604	1	1505016	1513188		NP_998769.2	471		chr19		2.01442	1.13421	2.74166	0.379543	4.72376	0.214991	0.695438	2.15105	0.976516	1.07918	0.470594	0.843665	2.6946	2.68465	1.36671	0.636515	0.667139	0.193272	0.61598	0.140403	1.01099	0.432706	0.877604	0.417054	1.62692	1.46418	1.58435	2.13724	1.96831	2.57923	1.46305	2.20776	2.93227	1.53383	0.522556	2.55033	1.1074	2.16412
ADAP1		NM_001284311	0.270079	937536	960526		NP_001271240.1	279		chr7		0	0	0.082121	2.51476	0	0	0.164578	0.367269	0.101657	0.67892	0.24853	11.6215	16.5816	0.0836519	0	14.1156	8.93208	0	0.423605	1.58001	0	0	0.30017	0	0.124835	0.127189	0	0.063322	0	0.818539	0	1.4974	0	0	0.129372	0	0	2.33219
ADAP1		NM_001284310	0.0513645	937536	966852		NP_001271239.1	302		chr7		0	0	0	0	0	0	0.0857001	0	0.106996	0.346326	0	0.455679	0.328492	0	0.386572	0.661605	0.543055	0	0	0	0	0.028344	0.44326	0	0	0	0.0446288	0	0	0.170399	0	0	0	0	0	0	0	0
ADAP1		NM_001284309	0.250424	937536	985452		NP_001271238.1	302		chr7		1.34287	0	0	0	3.50045	0	0	0	0.137055	0.503769	0	8.79556	13.4556	1.16644	7.49198	17.3917	9.39195	0	0	0	0	0	0	0	0	0.408948	0.0167254	0	0	0.135692	0	0.945944	0	0	0	3.83845	1.11808	0.659588
ADAP1		NM_006869	0.40908	937536	994319		NP_006860.1	374		chr7		0	0.0440876	0	0.685617	0.313787	0	0	0.226455	0	0.395353	0.0900513	0.352912	1.39517	0.39871	0.280703	1.81951	1.00142	0.268454	0.0849964	0.370794	0.108262	0.282036	0	0.0573824	0.136864	0	0.255891	0.107245	0.0600118	0.249525	0.313531	0.501716	0.0590178	0.113459	0.349769	0.357165	0.151257	0.105491
ADAP1		NM_001284308	0.0190525	937536	995043		NP_001271237.1	385		chr7		0	0	0	0	0.0482313	0	0	0.0686057	0	0.21018	0	0	0.833968	0	0	0.256556	0.268307	0	0.0433668	0	0	0	0	0	0	0	0	0	0	0.111426	0	0	0	0	0	0	0	0
ADAP2		NM_018404	1	29248753	29286211		NP_060874.1	381		chr17		0.292655	0.138594	0.0480874	0.155747	0.985687	0.0823851	0.235373	0.198643	0.311655	0.0620167	0.116408	0.0244502	0.0891774	3.41464	1.34067	0.0458238	0	0.152913	0.0267091	0.126748	0	0.108409	4.54165	2.08547	0	0.0276791	0.0667519	0.0481655	0.0472278	0.0633423	0	0.0975269	0	0.124453	0.785696	0.0339027	2.96224	0.100004
ADAR		NM_001193495	0.0293228	154554533	154578776		NP_001180424.1	931		chr1		0.965403	0	0	0.756554	0.510017	0.269122	0.239655	0.327267	0.349377	0.447551	0.584955	0	0.301944	0.163741	0	1.95839	0	0	0.159616	0.444315	0.104022	0.54512	1.24533	2.07561	0.874477	0.120954	1.02913	0.194617	0.238575	0.385885	0.0984349	0.0750898	1.27433	0.267043	0.317692	0.598245	0.475695	0.501859
ADAR		NM_001111	0.0103153	154554533	154580724		NP_001102.2	1226		chr1		0	0	0.059039	0	0	0	0	0.0476755	0	0	0	0	0	0	0	0.272043	0	0	0	0	0	0	0	0	0	0	5.60187e-16	0	0	0	0	0	0	0	0	0	0	0
ADAR		NM_015841	0.0601548	154554533	154580724		NP_056656.2	1181		chr1		0	0.776727	0	1.9095	1.6294	0.0210184	0.261445	0.166605	6.43546	0.707039	0.647328	0.646509	0.369018	0.0825294	0.215063	2.03878	1.77912	7.71971	3.87002	0.586835	0.141364	4.00651	2.94903	1.07873	0	0.765274	2.83474	0.079271	0.530348	0	1.87448	2.12841	0	1.52823	1.42824	0	0	0.687245
ADAR		NM_015840	0.107146	154554533	154580724		NP_056655.2	1200		chr1		3.28867	0	0.743089	15.6598	1.8114	0.918425	1.7496	3.00923	0	1.63688	2.69005	1.46106	1.67253	3.04241	2.88249	13.8065	0.215865	0	0	0	0.920808	3.06595	0	3.73069	2.6566	1.61323	0.0327228	1.94105	0.294934	2.19645	0.604951	0	2.27545	0	2.115	5.09586	1.5113	1.07452
ADAR		NM_001025107	0.793061	154554533	154600456		NP_001020278.1	931		chr1		27.0642	12.7446	6.45359	18.9695	19.8653	4.07672	23.4457	17.4564	18.9341	16.8723	23.3305	9.01889	11.866	23.44	19.3703	28.6229	11.0754	7.59625	32.5474	19.3325	8.91445	17.1497	8.7727	21.8173	14.4053	19.1537	8.77801	13.2155	10.1823	24.6519	13.007	17.3465	15.1427	4.39156	6.31012	22.6633	17.5472	15.3448
ADARB1		NM_001112	0.0494558	46494492	46646478		NP_001103.1	701		chr21		0	0.104194	0.271138	0.195661	0	0	0	0	0.258481	0.461424	0	0.0389537	0.0681787	0.0752011	0.0706834	0	0	0.0873172	0	0	0	0	0.218099	0.0948853	0	0.0761291	0	0	0.112129	0.226218	0.103448	0	0	0.161153	0	0	0	0.128742
ADARB1		NR_027672	0.116319	46494492	46646478		na	na		chr21		1.7348	0.45665	0.392711	0	0.146995	0	0.623318	0	0.25044	0.741495	0	0.0983505	0	0.445318	0	0	0	0.774318	3.13725	0.511792	0	0.622074	0.402977	0	0.259778	0.0476542	1.24968	0	0.235023	0.423413	0.441222	0.157098	0	0	0.0413142	0	0.105783	0.254907
ADARB1		NM_015833	0.207336	46494492	46646478		NP_056648.1	741		chr21		1.19345	0	0.344083	0	0.151381	1.66041	0.269173	0.389508	0.503259	1.99654	1.06293	0.0666811	0.0672516	0.201544	0.431234	0.0897391	0.180728	0	1.41577	0.26206	0.0308834	0.308908	0.147492	0.188508	0.160023	0.577971	0.527229	0.914012	0.201256	0.323796	0.373728	0.118128	0.770468	0.181681	0.125026	0.50397	3.65796	0.511131
ADARB1		NM_001160230	0.0812772	46494492	46646478		NP_001153702.1	674		chr21		0	1.35525	0.163313	0.25109	0	0	0	0	0.230148	0.267878	0	0.032895	0.089662	0.144717	0.0741906	0	0	1.954	0	0	0	0	0.278941	0.150848	0	0	0	0	0.102121	0.15357	0	0	0	0.0917974	0	0	0	0.0551055
ADARB1		NR_027673	0.146562	46494492	46646478		na	na		chr21		0.148103	0.0306638	0.188193	0	0.188952	0.766322	0.0168361	0.279699	0	1.29344	0.920548	0	0.145711	0.0164483	0.405561	0.0869331	0.0912536	0	0.10135	0	0.407673	0.0177546	0.0554982	0.274711	0.0412618	0.381652	0.0499499	0.681162	0.113947	0.0345078	0.252244	0.0659064	1.0738	0.148909	0.0552864	0.528871	2.82689	0.205669
ADARB1		NM_015834	0.395733	46494492	46646478		NP_056649.1	714		chr21		2.36221	0	0.276419	0	0.426901	0.943188	0.435928	0.935827	0.938824	4.79626	4.66524	0.0824471	0.0860861	1.06025	0.478896	0.129552	0.251164	0	0.904131	0.926185	0.264517	0.863166	0.129006	0.674045	0.386616	0.983505	1.7234	1.62006	0.324648	0.342967	0.492236	0.411507	1.20879	0.121776	0	1.18121	7.43796	0.769698
ADARB1		NR_073200	0.00331713	46494492	46646478		na	na		chr21		0	0	0	0	0	0	0	0	0	0	0	0	0	0	0	0	0	0	0	0	0	0	0	0	0	0	0	0.471737	0	0	0	0.0575917	0	0	0	0	0	0
ADARB2		NM_018702	1	1223252	1779670		NP_061172.1	739		chr10		0.014572	0.0254304	0.0871644	0.0222784	0.0279944	0.0343017	0.0212014	0.0286078	0.0412484	0.0400138	0.0224916	0.0517908	0.0169464	0.0275998	0.0141364	0.0457187	0.0317136	0.0698238	0.0157278	0.0625299	0.0444504	0.120383	0.388408	0.0300423	0.0294061	0.0208625	0.101648	0.0243773	0.0191258	0.130331	0	0.009965	0	0.21509	0.0144672	0.0255691	0.0174969	0
ADARB2-AS1		NR_033387	1	1568824	1599179		na	na		chr10		0	0	0	0	0	0	0	0	0	0	0	0	0	0	0	0	0	0.242051	0	0	0	0.0551046	0.387125	0	0	0	0.297643	0	0	0.0467731	0	0	0	0	0	0	0	0
ADAT1		NM_012091	0.879003	75632246	75657221		NP_036223.2	502		chr16		4.10123	0.958392	0.405208	1.66363	2.8911	1.09576	5.44462	2.25969	1.56143	2.35185	2.74183	1.01435	2.33965	1.07658	1.92343	1.72313	1.12957	0.906986	4.51252	0.78505	0.754263	1.62982	2.47626	1.43765	1.69412	2.08875	2.74312	2.97679	1.28005	1.19402	3.56656	2.86245	3.71157	1.28884	0.781824	4.13284	4.03405	1.24221
ADAT1		NR_036460	0.120997	75632246	75657221		NP_001311373.1	353		chr16		1.00802	0	0.659828	0	0.848289	0	0.139967	0.103688	0	0.294957	0.199811	0.0965321	0.432828	0.598446	0.24173	0.270438	0.0730649	0.373665	0	0.453922	0.0624121	1.13276	0	0	0.443559	0.251536	0.105431	0.405844	0.341366	0	0.135726	0	0.35102	0.208217	0.325952	0.393374	0.51072	0.154116
ADAT2		NM_001286259	0.407525	143743968	143763814		NP_001273188.1	144		chr6		0.111	0.207519	0.213363	0.206925	0.20482	0.171171	0.0592014	0.0765018	0.128948	0.145729	0.142214	0	0.439851	0.418253	0.56824	0.303859	0.138006	0.256036	1.10005	0.454534	0.829515	0.372272	0.137258	0.237746	0.108767	0.251821	0.0720489	0.245147	0.232672	0.0758614	0.130346	0.211797	0.358496	0.127666	0.0285137	0.270499	0.313168	0.168966
ADAT2		NM_182503	0.592475	143743968	143771841		NP_872309.2	191		chr6		0.30377	0.418068	0.0601501	0.559228	0.264794	0.0673683	0.431057	0.14704	0.259695	0.195817	0.221671	0.28419	0.460185	1.13462	0.275515	0.346586	0.784898	2.63962	2.3994	2.17433	0.84582	1.32676	0.383139	0.316113	0.437652	0.234638	0.363456	0.104951	0.212972	0.207516	0.267811	0.48593	0.0966131	0.176862	0.279688	0.354759	0.122159	0.293075
ADAT3		NM_138422	1	1905370	1913446		NP_612431.2	367		chr19		1.54941	0.0746603	0.719933	4.48566	1.6461	0.670898	1.49188	0.916311	2.1282	1.00909	0.910035	0.57708	0.674603	0.922194	0.857049	0.681917	1.06819	0.351702	1.66755	0.509408	0.738236	1.21506	2.02023	0.510014	0.45125	0.254608	2.29583	1.41252	1.29256	1.09652	1.45563	1.91098	1.07062	1.01238	0.67606	1.02865	0.871705	0.821479
ADCK1		NM_001142545	0.375746	78266425	78400297		NP_001136017.1	455		chr14		0.845633	0.110918	0.180405	1.65149	3.34889	0.632383	1.45307	0.267368	1.02038	1.03776	0.637028	0.291136	0.490744	1.25899	0.247466	0.34488	0.700518	0	3.77389	1.41523	0	1.58777	0.509769	0.331551	0	0.327515	2.24615	0.515524	0	2.10306	0.695513	0.804398	0	0.937758	0.693425	0.3457	0	0.290369
ADCK1		NM_020421	0.624254	78266425	78400297		NP_065154.2	523		chr14		3.65781	0	0.341382	0.274027	0.91323	0.147363	0.487016	0.973919	0.464088	1.0214	1.04404	1.18766	2.01251	0.964955	1.27433	0.342104	0.519954	0.130852	0.611428	0.120653	1.38665	0.345367	0.552749	0.705468	0.459751	2.79307	0.170375	3.96979	1.01356	0.518134	2.58774	0.943132	1.69988	0	0.204647	3.00496	1.67583	1.15045
ADCK2		NM_052853	1	140372952	140394908		NP_443085.2	626		chr7		4.1871	0.245763	1.24514	3.44704	4.70973	1.44696	4.26766	1.84203	6.22583	4.59581	4.36377	1.54053	4.7744	2.27687	4.47783	4.23266	2.43134	0	13.6393	0.338999	1.36728	5.31666	2.05987	1.44551	1.86143	5.201	4.10177	3.4137	2.0299	3.63119	3.14275	4.6124	7.74248	3.88011	1.75953	3.47631	3.05505	5.31717
ADCK3		NM_020247	1	227127937	227175246		NP_064632.2	647		chr1		2.5863	0.879122	0.773125	3.17219	3.24193	0.782643	2.00417	0.752435	2.02594	5.86669	1.31311	7.6701	4.4622	5.37242	4.57475	2.93483	7.71536	0.319507	7.62605	11.2437	3.80902	6.11915	11.6359	6.49921	1.6301	2.47589	7.48609	1.68948	2.87783	2.46012	3.21342	5.19395	4.30111	2.30364	2.01934	1.04348	2.26477	4.11398
ADCK4		NM_001142555	0.671076	41197433	41221011		NP_001136027.1	503		chr19		1.63429	0.0876629	1.09924	2.4086	3.73137	0.468872	2.95796	2.71638	5.7994	3.28263	2.01313	1.37147	1.45618	2.41798	0.711111	3.54359	2.98058	0	6.54663	1.80857	0	1.65856	1.48138	1.31443	1.60516	1.51229	3.05766	0.959792	2.53536	1.89798	3.72567	2.59569	2.52378	0.825399	4.86755	3.20123	1.02908	1.53672
ADCK4		NM_024876	0.328924	41197433	41222790		NP_079152.3	544		chr19		1.14914	0	0.436602	0.286652	0.809905	0.449266	0.811323	1.21142	0.8339	1.18807	1.81849	0.691211	2.57308	0.311903	2.51704	0.469867	0.572708	0.17413	0.989342	0.175251	1.46984	0.324733	0.133251	0.242762	0.887178	1.41403	1.07769	1.22484	1.80722	0.137096	2.21617	2.67278	1.60976	0.381568	0.699082	3.22589	1.66774	0.641836
ADCK5		NM_174922	1	145597703	145618453		NP_777582.4	580		chr8		2.15114	0.0511252	1.24944	2.25623	1.2406	1.10088	1.08227	1.81005	1.05724	2.68035	1.34564	2.4204	1.52126	2.49415	0.868841	2.48223	1.20231	0.233404	5.92697	0.746252	0.688894	2.02938	0.867433	0.816282	0.830142	1.51038	2.42858	1.394	1.46494	2.33367	3.23831	2.39413	2.33981	0.906767	0.880192	2.15825	2.49956	1.71742
ADCY1		NM_001281768	0.307936	45613738	45704271		NP_001268697.1	338		chr7		1.4635	0.0489857	0	0.234013	0.128796	0.131343	3.14775	0.035322	0	1.94528	0	0	0.795876	0	0	0	0	0	0	0.121924	0	0	0.399376	1.30444	0	0.550998	1.50488	2.93864	0.783847	7.63906	2.28004	2.78767	0	0	0.197055	0.488123	0	1.40156
ADCY1		NM_021116	0.692064	45614124	45762714		NP_066939.1	1119		chr7		1.22177	0.0249758	0.141667	0.0806584	0.0778107	0.0790439	2.58135	0.0604828	0.119723	1.75693	0.0318729	0.0291626	0.678201	0.0506083	0.0310567	0.0594862	0.0387673	0.0422083	0.0286131	0.047377	0	0.166471	0.712109	2.68766	0.0107449	2.12673	2.23784	5.08095	1.14884	6.73224	4.28947	3.82342	0.0148337	0.149131	0.394399	0.328332	0.0544053	0.696621
ADCY10		NM_001167749	0.641486	167778624	167883464		NP_001161221.1	1457		chr1		0	0.023892	0.0340521	0	0	0	0.114501	0.0194559	0.0690833	0.0278872	0	0.0320339	0	0	0	0	0.0667917	0	0.0279931	0.0231708	0.033461	0.125986	0	0.0531349	0	0.0146115	0.0339791	0	0.0171347	0.0275359	0.0144722	0.0160749	0	0.0601564	0.0242378	0	0.0191929	0
ADCY10		NM_018417	0.284287	167778624	167883464		NP_060887.2	1610		chr1		0	0	0	0	0.029015	0	0	0	0.0338177	0	0.0148017	0	0	0.024137	0.0451364	0	0	0	0	0	0	0	0	0	0	0	0.0166863	0.0168242	0	0	0	0	0	0	0	0.0516802	0	0.0477684
ADCY10		NM_001297772	0.0742267	167778624	167883464		NP_001284701.1	1518		chr1		0	0	0	0	0	0	0	0	0	0.036613	0	0	0	0	0	0	0	0	0	0	0	0	0.219521	0	0	0	0	0	0	0	0	0	0	0	0	0	0	0
ADCY10P1		NR_026938	1	41068772	41108573		na	na		chr6		0.050372	0.292479	0.12822	0.0587949	0.00876468	0.0307993	0.144149	0.0157377	0.109782	0.0741437	0.0667368	0.0444012	0.0609235	0.102468	0.06299	0.0592334	0.0633602	0.364136	0.322161	0.0654792	0	0.230923	0.357658	0.0834086	0.027077	0.127027	0.129224	0.0526688	0.150229	0.033539	0.153818	0.0362364	0.319756	0.213254	0.0351529	0.0603115	0.0297657	0.338219
ADCY2		NM_020546	1	7396342	7830194		NP_065433.2	1091		chr5		0	0.0154015	0.0943559	0	0.0324642	0.0176318	0.0193973	0.0110987	0.0455007	0.570978	0.0130397	0.0214376	0	0.0164464	0	0.0244489	0.0188527	0.0765967	0	0.0474511	0	0.0885921	0.110132	0.0111286	0	2.5216	0.904272	0.208783	1.31532	11.6257	1.48303	0.0999056	0	0.154557	0	0.0148087	0	0
ADCY3		NM_004036	1	25042038	25142055		NP_004027.2	1144		chr2		4.25292	3.76177	1.83178	1.67525	1.21694	1.8013	4.51186	2.37829	2.67543	7.37578	4.85629	0.158841	8.68268	5.2331	8.49692	5.08252	3.02716	2.22446	4.81207	1.32363	4.06184	2.13075	1.6462	4.34843	5.04259	5.86862	6.52004	7.41156	9.72317	2.56926	6.73723	9.5332	11.8286	2.49317	4.07272	4.82676	3.37992	5.79354
ADCY4		NM_001198568	0.696661	24787554	24804277		NP_001185497.1	1077		chr14		0.0395681	0.031982	0.050243	0	0.0651232	0	0	0.0379886	0.0822227	0.131196	0	0.0895914	0.121019	0.0362677	0.0614039	0.126936	0	0.131834	0.171449	0.049976	0	0.360103	0.160355	0	0	0	0.0577044	0.0242502	0	0.0917295	0	0	0	0.097248	0.0519038	0	0.0781953	0
ADCY4		NM_139247	0.222139	24787554	24804277		NP_640340.2	1077		chr14		0	0	0	0	0	0	0.0352551	0	0	0	0.0190391	0	0	0.137588	0	0.0589682	0.0386552	0	0	0.164207	0	0	0	0	0	0.0345319	0.109791	0.0191654	0	0	0	0	0	0	0	0	0	0
ADCY4		NM_001198592	0.0811995	24787554	24804277		NP_001185521.1	1077		chr14		0	0	0	0	0	0	0.0305772	0	0	0	0	0.127404	0	0	0	0.032041	0.0360026	0	0	0.0294878	0	0.233078	0	0	0	0.0300199	0	0.0178208	0	0	0	0	0	0	0	0	0	0
ADCY5		NM_001199642	0.175768	123001142	123135189		NP_001186571.1	911		chr3		0.0537798	0.0149499	0	0.148206	0	0	0	0	0	0.0216011	0	0	0	0.0679326	0.0372452	0.0396278	0	0	0	0	0	0	0.107266	0.182344	0	0	0.055187	0	0	0	0.0741184	0	0	0.092185	0	0.160001	0	0.0655576
ADCY5		NM_183357	0.824232	123001142	123167392		NP_899200.1	1261		chr3		0	0.0172854	0.1258	0	0.0871261	0.118633	0.0759919	0.120155	0.175467	0.157929	0.066178	0.0835434	0.031028	0.114789	0.0325637	0.150722	0.090667	0.13633	0.0485634	0.121011	0.0262823	0.303429	0.397151	0.122435	0	0.0454456	0.196534	0.0474104	0.0460423	0.0992027	0.0876368	0.0757795	0.0536042	0.15973	0.119178	0.0904554	0.0496043	0.0506483
ADCY6		NM_015270	1	49159973	49182879		NP_056085.1	1168		chr12		5.8758	0.187059	1.02997	2.1676	8.82827	0.850853	3.8461	3.4038	1.45761	2.64122	1.80978	1.20896	4.8717	1.54977	4.48363	4.01857	2.51037	0.253812	0.0831218	0.0729105	0.053543	0.214685	0.954245	0.390075	0.260725	5.14631	2.67358	0.968762	1.82593	3.36751	2.10493	1.83531	2.97529	0.615233	1.13102	3.56155	2.44592	0.718577
ADCY7		NM_001286057	0.046225	50300450	50344440		NP_001272986.1	734		chr16		0	0	0	0	0	0	0	0.222818	0.0877395	0	0.0849538	0	0.112558	0.0717846	0.197885	0	0	0	0.15959	0.0661827	0.469701	0	0	1.75862	0.0878386	0	0	0.698112	0	0	0.0620408	0.0828021	0	0	0.196175	0.116087	0.250844	0
ADCY7		NM_001114	0.953775	50321822	50352045		NP_001105.1	1080		chr16		0.928719	1.21491	1.31847	0.135386	0.141391	0.104521	0.479287	3.29603	1.15375	0.537998	2.12066	0.287304	2.97138	1.85441	3.91749	0.430291	0.765059	1.13513	4.69808	2.58009	3.74674	1.57199	2.53926	5.66545	2.67009	1.13303	0.258029	1.88232	0.094007	0.295472	1.21058	1.19783	0.18898	0.145732	0.907901	3.87137	3.73673	2.61974
ADCY8		NM_001115	1	131792546	132052835		NP_001106.1	1251		chr8		0	0.0234836	0.13504	0	0.020339	0.0394257	0.0910446	0.0646929	0.0543107	0.0358032	0.121447	0.0540122	0	0.0287684	0	0.028818	0.022302	0.0556676	0	0.0267893	0	0.0978979	0.179718	0.0253644	0.0277334	0	0.158221	0.0339021	0	0.130948	0.121894	0.0395654	0	0.129914	0.0332938	0	0	0
ADCY9		NM_001116	1	4012649	4166186		NP_001107.2	1353		chr16		3.38605	1.13749	2.09803	2.10873	3.59485	1.00315	3.83796	2.78427	1.08576	3.57207	1.52518	0.498577	1.68226	1.14421	2.49722	0.241941	0.6793	0.291614	0.0434901	0.718756	0.0894565	0.256097	0.537718	0.317997	0.567837	2.76311	2.53089	1.8586	1.81026	1.53143	1.51872	3.20772	3.51643	1.66979	1.69063	2.9858	1.48602	2.87452
ADCYAP1		NM_001099733	0.618537	904943	912173		NP_001093203.1	176		chr18		0	0	0	0	0.0175217	0.0296078	0	0	0	0.02842	0.0326988	0	0.0362894	0.0219743	0.0355366	0.134893	0.0254082	0	0.0431585	0.0394581	0	0.0630513	0	0	0.077982	0	0.0214341	0.0177639	0.074286	0.0365652	0	0	0	0	0.0482672	0	0.149152	0.0305516
ADCYAP1		NM_001117	0.381463	905196	912173		NP_001108.2	176		chr18		0	0.0373528	0.153687	0	0.0171823	0	0	0	0.0802063	0	0	0	0	0.0353059	0	0	0	0	0	0	0	0.0378197	0.143502	0.0472873	0	0.0218958	0.071477	0	0	0.00947534	0.0605832	0	0	0.107838	0	0	0	0
ADCYAP1R1		NM_001199637	0.785922	31092075	31151093		NP_001186566.1	447		chr7		0	0.0233347	0	0	0.0120475	0.0182604	0.0325788	0.0135769	0.121717	0	0.0124183	0	0	0.0196387	0	0.0197232	0	0	0	0.0159768	0	0.0423942	0.363889	0	0	0	0.0452879	0.0223067	0	0	0	0.0163688	0	0.110583	0.0300826	0	0	0.0215416
ADCYAP1R1		NM_001118	0.136273	31092075	31151093		NP_001109.2	468		chr7		0	0	0	0	0	0	0	0	0	0.0154163	0	0	0	0	0	0	0.0110983	0.0254374	0	0	0	0	0	0.0212767	0	0	0	0	0	0	0	0	0	0	0	0	0	0
ADCYAP1R1		NM_001199635	0.0216064	31092075	31151093		NP_001186564.1	496		chr7		0	0	0.0465164	0	0	0	0	0	0	0	0	0	0	0	0	0	0	0	0	0	0	0	0	0	0	0	0	0	0	0.016433	0	0	0	0	0	0	0	0
ADCYAP1R1		NM_001199636	0.0561986	31092075	31151093		NP_001186565.1	495		chr7		0	0	0.0604379	0	0	0	0	0	0	0	0	0	0	0	0	0	0	0	0	0	0	0	0	0	0	0	0.0057236	0	0	0.0218421	0	0	0	0	0	0	0	0
ADD1		NM_001119	0.736224	2845583	2931802		NP_001110.2	737		chr4		8.24647	8.81002	7.52294	6.86837	12.4884	4.50324	19.3214	19.0907	10.8429	12.9309	14.1923	6.43038	11.1731	13.6556	12.3403	9.64014	7.71375	3.06086	35.5456	8.3907	8.39407	18.0704	3.05158	2.14468	11.4192	8.34136	7.59406	7.93513	5.629	8.37294	8.18145	11.9512	8.42604	1.36879	2.82588	7.82728	15.4986	10.9002
ADD1		NM_014189	0.163837	2845583	2931802		NP_054908.2	768		chr4		2.81149	1.15772	2.38927	2.43409	1.70705	2.16205	3.95226	3.10954	4.75941	2.71827	3.09352	0.196517	2.39858	1.84055	2.5397	2.88656	1.38585	0.431754	2.36153	1.05251	0.589164	4.42823	0.697298	0.594267	2.95857	1.55575	0.763885	2.81243	2.95302	0.19852	1.41152	1.6877	1.69918	1.58787	2.30915	1.00969	4.88121	3.42167
ADD1		NM_014190	0.0655816	2845583	2931802		NP_054909.2	631		chr4		0.742642	1.5607	0	0.544187	0.530423	0.180235	1.03077	0.720737	1.02804	0.844967	1.56274	0.484475	0.38511	1.02973	1.63112	0.493927	0	0	0.553214	0	0	0.118498	0	0.362438	2.21347	0.226934	0.569772	1.11413	0.43801	0.161665	0.496793	0.685796	0.274403	0	0.332578	1.24216	0.954441	2.77344
ADD1		NM_176801	0.0172326	2845583	2931802		NP_789771.1	662		chr4		0.266434	0.214261	0	0.204297	0.075376	0.0917969	0.220262	0.105792	0.476371	0.184117	0.353601	0	0.0859532	0.560162	0.340924	0.156384	0	0	0.039848	0	0.714686	0.032418	0	0.10333	0.0633228	0.0437598	0.0515221	0.405726	0.242189	0	0.0896148	0.109663	0.0578185	0	0.285763	0.170593	0.312912	0.884933
ADD1		NM_001286645	0.0171248	2845876	2931802		NP_001273574.1	662		chr4		0.200455	0.12351	0.182914	0.0826297	0.143086	0	0.304939	0.271915	0.214415	0.271669	0.335681	0.159998	0.194633	0.0880605	0.184646	0.161959	0.0621575	0.187211	0.118417	0.13579	0.188826	0.302295	0.140729	0.11363	0.320616	0.165892	0.45	0.197553	0.137412	0.122005	0.193575	0.21421	0.125998	0.112103	0.0748517	0.207747	0.326765	0.169232
ADD2		NM_001185054	0.348818	70889215	70994847		NP_001171983.1	726		chr2		0	0	0.0903184	0	0.0213996	0	0.309408	0	1.31144	0.473131	8.97837	0.0233863	0	0.0104249	0	0.0297394	0	0.0691689	0.0279985	0.300643	2.40543	0.019807	0.790366	0.396435	0	0	0.0212192	0	0	1.55933	0.444626	0.540955	0	0	1.03329	0	0.0281673	0
ADD2		NM_001617	0.399977	70889215	70995375		NP_001608.1	726		chr2		0	0	0	0	0	1.76073	0.105423	0.0136853	1.18312	0.883616	4.89944	0	0	0.0140995	0	0	0.0224361	0	0	0	6.10341	0.372162	0.566655	4.13583	0	0.0179366	0	0	0.0261964	0.163694	0.85235	0.0361205	0	0	4.15433	0	0.166366	0
ADD2		NM_017488	0.0442663	70889215	70995375		NP_059522.1	643		chr2		0	0	0	0	0	0.11871	0	0	0.0553235	0.041331	0.380939	0	0	0	0	0	0	0	0	0	0.502174	0.0148839	0	0.0641865	0	0	0.0362782	0	0	0.292058	0.0585296	0.0500644	0	0.117895	0	0	0	0
ADD2		NM_001185055	0.166336	70902215	70995375		NP_001171984.1	575		chr2		0	0.0253024	0.0626415	0	0.0183793	0	0	0	0.583223	0.0298965	0	0	0	0.014133	0	0.0284166	0	0	0	0.054005	0	0.0610682	0.336365	0	0	0	0.0372248	0.0209798	0	0.152014	0.0680124	0.0309273	0	0.146293	0.372161	0.0215689	0	0
ADD2		NM_017482	0.0406027	70902215	70995375		NP_059516.2	559		chr2		0	0	0.0516225	0	0	0.158165	0	0	0	0.0575012	0.491809	0	0	0	0	0	0	0	0	0	0.915655	0	0	0.393561	0	0	0	0	0	0	0.0659238	0	0	0	0	0	0.0261586	0
ADD3		NM_019903	0.385428	111765725	111895323		NP_063968.1	674		chr10		0.601114	6.69497	1.60545	0.0456476	0.181639	0	0.509637	1.53128	2.0517	2.98989	1.77438	1.35162	3.18785	1.61875	1.58458	0.263214	2.44151	15.7963	3.67114	1.51775	0	0.453541	0	0.112954	0.611512	5.4867	2.15544	0.839971	1.56437	0.963175	1.08512	2.1493	3.68796	1.78363	0	0.29085	1.40905	1.843
ADD3		NM_001121	0.230814	111767710	111895323		NP_001112.2	674		chr10		0	0	0.529479	0	0	1.01385	0.953516	1.57495	1.05101	2.37101	0.96223	0	0	0	0	0	0	0	0	0	0.863617	0	0.186404	0.114837	0.0805972	0.586617	0.490158	0.888674	1.08944	0	0	0.0811064	2.00595	0.318632	0.613106	0	0	0
ADD3		NM_016824	0.383758	111767710	111895323		NP_058432.1	706		chr10		2.03041	2.41199	0.0535355	0	1.37133	0.51363	0.141449	0.612591	0	0.10626	0.522755	7.06874	9.68821	4.38342	4.12382	7.02641	11.0871	6.51717	9.27933	1.3378	1.2877	1.04818	0.340391	0.286386	0.303666	1.57057	0.232966	0.877483	0.633134	4.0279	2.50565	0.348528	1.03306	0.483973	0.338936	0.319422	0.334029	4.16613
ADD3-AS1		NR_038943	1	111705316	111768139		na	na		chr10		0.123031	0.230288	0.0801627	0	0.0572498	0.101656	0.0443887	0.0340905	0.0692784	0.192004	0.0451507	0.800246	0.476912	0.196552	0.329642	0.488199	0.86396	0.113114	0.358158	0.216746	0	0.259226	0.17772	0.0750635	0	0.120163	0.56506	0.111867	0.169589	0.225661	0	0.114124	0	0.219736	0.21132	0	0	0.158778
ADGB		NM_024694	1	146920135	147136597		NP_078970.3	1667		chr6		0	0.0158319	0	0	0	0.0273003	0.0198261	0.0262929	0	0.00672642	0.00978167	0.0274121	0	0.00791799	0	0	0	0.0206031	0.0103058	0.0171994	0	0.0197744	0	0	0	0	0.0462141	0.0111677	0	0.0391233	0.0222653	0.044117	0.0276537	0.0684865	0	0	0	0.0226965
ADGRA1		NM_001083909	0.815917	134901507	134945179		NP_001077378.1	560		chr10		0.0513091	0.0307688	0.0724339	0	0.0425315	0.0724678	0.026623	0.0340424	0	0.0733001	0.0379202	0.0592374	0	0.047947	0.0583934	0.0596469	0.087424	0.070723	0.0396379	0.0309207	0	0.18386	0	0.0415413	0.0458772	0.0427802	0.127011	0.039897	0.0346097	0.131083	0	0	0	0.138397	0.0471763	0.0433014	0.0338225	0
ADGRA1		NM_001291085	0.184083	134915749	134945179		NP_001278014.1	463		chr10		0	0	0	0	0	0	0	0	0.104599	0.01726	0	0	0.0343773	0	0	0	0	0.0362531	0	0.0726888	0	0.0332083	0.159746	0	0	0	0.0310541	0	0	0.0421896	0	0.0237142	0	0	0	0	0	0.0336494
ADGRA1-AS1		NR_111905	1	134898752	134900201		na	na		chr10		0	0	0	0	0	0.269216	0	0	0	0.129923	0	0	0	0	0	0	0	0	0	0	0	0	0	0	0	0	0.136931	0	0	0.11752	0	0	0	0	0	0	0	0
ADGRA2		NM_032777	1	37654400	37701504		NP_116166.9	1338		chr8		0.0844858	0.0835657	7.53274	0.565903	0.177293	0.393166	1.12839	13.3978	0.533495	2.63884	0.717411	0.123628	0.0834615	0.848543	0.359056	0.08289	0.0627166	0.134884	0.143575	0.134529	0.0626061	0.309718	0.253847	0.0432728	0.247432	2.35062	0.93113	0.422707	0.368767	1.92263	0.954038	2.07505	3.7306	1.0644	0.319792	0.496118	0.134525	0.07773
ADGRA3		NM_145290	1	22388996	22517677		NP_660333.2	1321		chr4		2.46701	6.45971	1.71613	1.91439	1.65684	0.748865	7.65429	1.92887	5.62839	2.55553	4.11709	1.1952	2.77585	5.26877	3.96911	2.85161	2.62388	5.91116	4.54598	1.43137	0.104325	3.69069	0.146171	0.480412	1.43769	2.49217	2.7393	4.6547	3.03174	2.56388	3.17501	3.06155	3.99833	1.20631	1.48942	3.37185	7.66804	4.81287
ADGRB1		NM_001702	1	143545376	143626368		NP_001693.2	1584		chr8		2.23109	0.0347973	0.181269	0.0582519	0.124339	0.0558479	0.0448348	0.0802431	0.0775524	0.148689	0.0657191	0.0805381	0.0504171	0.238859	0.0296305	0.145173	0.0943482	0.12693	0.0498466	0.562602	0.0397852	0.241992	0.786064	2.34176	1.95534	0.206228	0.307301	0.17226	0.0856327	1.05218	0.121325	1.92181	0.0231641	0.122134	0.161735	0.0633828	0.0299877	0.0317108
ADGRB2		NM_001294336	0.816076	32192705	32229664		NP_001281265.1	1551		chr1		0.289917	0.0247725	0.773653	3.29352	2.46221	0.426904	1.47362	6.36261	1.56182	4.22653	1.02334	0.0905378	0	0.540017	0.212823	0.109704	0.0658697	0.0772664	0.854313	0	0	1.37704	0.393259	0.23778	0.423643	0.535603	0.192373	0.0880253	1.10697	1.09204	1.20784	0.598867	0.0695339	0.165095	0.579298	3.56979	1.87451	0
ADGRB2		NM_001294335	0.183924	32192705	32229664		NP_001281264.1	1584		chr1		0.129958	0	0.123735	0	0.134209	0.104541	0.172964	1.68171	0.292508	0.579538	0.676407	0	0.0730083	0.26853	0	0	0	0	0	0.0537424	0	0.172224	0	0	0	0.481938	0.171522	0.0807744	0.103275	0.120662	0.325992	0.426194	0	0	0	0.674251	0.27209	0.654275
ADGRB3		NM_001704	1	69345631	70099403		NP_001695.1	1522		chr6		0	0.015744	0.0413773	0	0	0	0	0.00959806	0.038435	0.014578	0.116678	0	0	0.0143608	0	0.00889963	0.0133073	0.033015	0	0	0.236987	0.0313098	0.132417	0.0394768	0.139564	0	0.047241	0.0181947	0	0.588388	0.038185	0.0397634	0.0339057	0.183094	0	0	0.0251511	0
ADGRD1		NM_198827	1	131438451	131626008		NP_942122.2	874		chr12		0.0538427	0.187834	0.0739616	0	0.0403185	0.025709	0.113916	0.0265799	0.0617746	0.0488908	0.0228906	0.0454399	0	0.0683374	0	0.0295965	0.0257707	0.0926079	0.0117777	0.0419775	0.390453	0.0833079	0.16657	0.0243904	0.0162531	0.0305878	0.102962	0.156746	0.014546	0.124699	0	0.0246447	0	0.131949	0.0877214	0.717342	0.340477	0.0981259
ADGRE1		NM_001256255	0.632561	6887559	6940464		NP_001243184.1	709		chr19		0	0	0	0	0.0612954	0.0787597	5.11361	0.603898	0	0.220823	0	0	0	0	0	0	0	0	0.232072	0.334371	0	0.0279584	0.248869	0.32354	1.87125	0	0.0303426	0.72823	0	0.154939	0	0.0608891	0.0337622	0.0571283	0.164851	0.387432	1.48697	0.226354
ADGRE1		NM_001256254	0.0789677	6887559	6940464		NP_001243183.1	745		chr19		0	0	0	0	0	0	0	0	0	0	0	0	0	0	0	0	0	0	0	0.0493958	0	0	0.227383	0	0	0	0	0	0.0277281	0.0322627	0	0	0	0	0	0	0	0
ADGRE1		NM_001256253	0.0940103	6887559	6940464		NP_001243182.1	821		chr19		0	0	0	0	0	0	0	0	0.0751202	0.0205584	0	0	0	0	0	0	0	0.0450341	0.0800916	0	0	0	0	0	0	0	0	0	0	0	0	0	0	0	0	0	0	0
ADGRE1		NM_001256252	0.146842	6887559	6940464		NP_001243181.1	867		chr19		0	0	0.0740917	0	0	0	0.450598	0.0393791	0	0.0313846	0	0	0	0	0	0	0	0	0	0	0	0.0746168	0	0.131054	0.201648	0	0	0.0713119	0	0.0197072	0	0	0	0.0857611	0.072195	0	0.0634683	0
ADGRE1		NM_001974	0.047619	6887559	6940464		NP_001965.3	886		chr19		0	0	0	0	0	0	0	0	0	0	0	0	0	0.0125817	0	0	0	0	0	0	0	0	0	0	0	0	0	0	0	0	0	0	0	0	0	0	0	0
ADGRE2		NM_001271052	0.471109	14843508	14887739		NP_001257981.1	765		chr19		0	0	0.0307953	0	0.0398654	0	0.108481	0.12002	0.0380894	0.0504038	0.127048	0.223573	0	0.239897	0.0386867	0.115668	0.11159	1.89205	0	0	0.308754	0.252797	0.369195	0.553106	0.0649971	0	0	0	0.0337611	0.117343	0	0.101531	0.188206	0.0533858	0.0792627	0.0865056	0.0427912	0.150196
ADGRE2		NM_013447	0.528891	14843508	14889353		NP_038475.2	823		chr19		0.211359	0.0248315	0.112638	0	0.0851189	0.149553	0.0242393	0.0185387	0.0505137	0.0263298	0	0	0.565522	0.843179	0.120721	0	0.16313	0.145437	0.0581399	3.84006	0.832755	0.236223	0.385313	0.381049	0	0.106943	0.20311	0.111657	0.192499	0.0638255	0.0310063	0.252141	0	0.200401	0	0.387065	0.173298	0
ADGRE3		NM_001289159	0.526316	14729928	14785730		NP_001276088.1	526		chr19		0	0	0.10964	0	0	0	0	0	0	0	0	0	0	0	0	0	0	0	0	0.330625	0	0.0665846	0	0.135261	0	0	0	0.0250938	0	0	0	0	0	0.0851261	0	0	0	0
ADGRE3		NM_001289158	0.177889	14729928	14785730		NP_001276087.1	600		chr19		0	0	0	0	0	0	0	0	0	0	0	0	0	0	0	0	0	0.0355301	0	0	0	0	0.144717	0	0	0	0.0197345	0	0	0	0	0	0	0	0	0	0	0
ADGRE3		NM_032571	0.295795	14729928	14785730		NP_115960.2	652		chr19		0	0	0	0	0	0	0	0	0.0486148	0.0231693	0	0	0	0.0189326	0	0	0	0	0	0	0	0	0	0	0	0	0.0322131	0	0	0.0401091	0	0	0	0	0	0	0	0
ADGRE4P		NR_024075	1	6952510	6990857		na	na		chr19		0	0	0	0	0	0	0	0	0.0573097	0	0.0207077	0	0	0	0	0.029376	0	0.0867234	0	0.0607506	0	0.0293647	0.106151	0	0	0	0.062333	0.0189439	0	0.0223858	0	0	0	0.122582	0	0	0.524647	0
ADGRE5		NM_001784	0.710229	14491955	14519537		NP_001775.2	742		chr19		0.689686	3.82576	3.69145	0.789256	2.52178	4.11065	15.2163	7.2619	8.53229	4.09379	9.98381	8.40997	7.80234	6.37399	6.46513	4.24165	9.94454	1.28416	3.22504	3.86626	3.48096	0.444514	4.03534	2.82109	4.2057	3.76167	7.54013	2.17367	5.48374	6.29312	4.64685	25.612	10.2586	5.36248	3.18506	7.69422	9.38785	14.6226
ADGRE5		NM_001025160	0.20255	14491955	14519537		NP_001020331.1	786		chr19		1.38483	3.11803	2.29806	0.559846	0.24717	0	4.30692	4.64704	0.0678319	1.67026	2.06762	11.427	3.68578	0.814456	3.10456	0.788962	1.37266	0	0.202525	0.136045	0.821425	0.231729	0	1.26447	1.44684	0.581016	1.63187	2.21332	3.6756	0.178808	0.740101	2.15362	4.80638	0	0	2.94598	1.80696	5.65803
ADGRE5		NM_078481	0.0872207	14491955	14519537		NP_510966.1	835		chr19		0.0985918	0.195821	0.428848	0	0.217316	0.584214	1.1414	2.13154	0.104403	0.783261	1.76643	2.22866	0.509324	0.914313	0.75281	0.259363	0.766991	0	0.113343	0.945759	1.06772	0.197612	0.348927	0.947546	0.869783	0.263484	2.00523	1.39514	0.956416	0.135379	0	1.64979	2.12133	0.312365	0.472522	2.06239	0.645951	2.1814
ADGRF1		NM_153840	0.833576	46965439	47010099		NP_722582.2	910		chr6		0	7.86972	0.0991095	0	0.146753	0.0131438	0.0795747	0.0164414	0.0595066	0.011743	0.0196919	0	0.100582	4.76715	0	3.619	0.123182	0	0.0158739	0	0	0.0481907	0.0943035	0	0	0.0229903	0.0333153	0.0776263	0	0.0294814	0	0.0187832	0	0.211609	0	0	0.0731234	0
ADGRF1		NM_025048	0.166424	46987621	47010099		NP_079324.2	218		chr6		0	1.19669	0	0	0.0995752	0	0	0	0.0807224	0	0	0	0	0.167612	0	0.174042	0	0	0	0	0	0.0774052	0.173852	0	0	0	0	0	0	0	0	0	0	0.171327	0.0767298	0	0	0
ADGRF2		NM_153839	1	47624325	47665533		NP_722581.4	642		chr6		0	0	0.104405	0	0	0	0.0151721	0	0.049694	0.0121718	0	0.0202842	0	0.0127662	0	0.0208542	0	0.0439169	0.0240673	0	0	0.0316781	0.227104	0	0	0	0.0253732	0.0147724	0	0.0425595	0	0.0169111	0	0.14594	0	0.0355295	0	0
ADGRF3		NM_001145169	0.122961	26531040	26541970		NP_001138641.1	997		chr2		0	0.0609098	0.0555436	0	0	0	0	0	0.0355621	0.0209687	0.0121496	0.0478742	0	0.0159976	0	0	0	0.0641722	0.241196	0	0	0.196049	0.0737282	0	0	0	0	0.0140767	0	0.0110859	0	0	0	0.139664	0	0	0	0
ADGRF3		NM_153835	0.847074	26531040	26569685		NP_722577.2	873		chr2		0.0656293	0	0.109454	0	0.0518433	0.0402087	0.0365779	0.0527555	0.0514803	0.0794246	0.0622466	0.0744449	0.134923	0.0492902	0.0867831	0.191423	0.0929203	0	0.289151	0.0787581	0.0640573	0.391437	0.15841	0.117078	0.0277579	0.0811755	0.156463	0.0616588	0.0828771	0.0714438	0.0519429	0.031706	0.0905445	0.0871738	0.119251	0.059605	0.0639718	0.0331546
ADGRF3		NM_001145168	0.0299647	26532811	26541917		NP_001138640.1	1079		chr2		0	0	0	0	0	0	0	0	0	0	0	0	0	0	0	0	0	0	0	0	0	0.0234913	0.0844623	0	0	0	0.0164463	0	0	0.0179727	0	0	0	0	0	0	0	0
ADGRF4		NM_153838	1	47666288	47689757		NP_722580.3	695		chr6		0.180584	0	0.118251	0	0.0195981	0	0.151839	0	0.0465789	0.0117862	0	0.41246	0.19576	0.0218276	0.160214	0.486817	0.0298019	0.0478554	0	0	0	0.0423518	0.182065	0	0	0.0209423	0.014497	0.0262968	0	0.014766	0	0	0	0.15355	0.0546733	0.145252	0.0755609	0.0781365
ADGRF5		NM_001098518	0.406252	46820241	46889714		NP_001091988.1	1346		chr6		0	14.7597	0	0	0	0	0	0	0.0330684	0	0	0	0	0.00866031	0	0	0	0	0	0	0	0	0.0699203	0	0	0	0.00782539	0	0	0.0168657	0	0	0	0.124712	0	0	0.198187	0.543031
ADGRF5		NM_015234	0.593748	46820241	46922675		NP_056049.4	1346		chr6		0	5.33606	0.103292	0	0.0141138	0.034494	0.0867335	0.00820929	0	0.00689781	0	0	0	0	0	0	0	0.0521062	0	0.0164569	0	0.0302782	0.0790767	0	0	0.0223457	0.0209245	0.0335042	0	0.0155005	0.0710767	0	0	0	0	0	0	0
ADGRG1		NM_001290142	0.20402	57653604	57698951		NP_001277071.1	523		chr16		0.551713	1.02835	0.0714628	0	2.95063	0	14.9146	0.135408	18.3472	0.783829	3.35597	5.11769	1.29173	0.984715	1.56896	8.07157	2.62438	5.50895	0.542372	0	0	0.659243	1.02309	0	0	0.595794	33.7249	1.42093	8.32205	2.56014	27.7134	34.429	5.14306	11.6336	0.521196	0.190002	0.694767	1.22566
ADGRG1		NM_001290143	0.0729791	57653604	57698951		NP_001277072.1	518		chr16		0.467073	0	0	0.105369	2.38329	0	0.735781	0	1.67811	0	0.781815	2.52057	2.70728	0.407806	1.96131	2.9465	0.970078	0	0	0.10078	0	0	0	0.0831524	0	0.699402	3.79301	1.81098	1.8043	0.059083	1.55869	0.0915002	2.45715	2.2291	0	0.124054	0	0
ADGRG1		NM_005682	0.0719345	57653909	57698951		NP_005673.3	693		chr16		2.32201	0	0	0	0	0	0	0.393436	0	0	1.15587	4.18972	0	0	0	0.43611	0	0	0	0	0	0.149921	0.135014	0	0	5.02763	0	20.8666	12.3961	0	0	0	7.06387	0	0.542492	1.13925	0	0
ADGRG1		NM_001145770	0.434172	57653909	57698951		NP_001139242.1	687		chr16		2.79683	0.245122	0.0835105	0	13.7546	0	9.60319	1.09531	6.31953	1.62327	11.6499	15.3076	10.2025	3.60058	5.87122	14.4866	6.60753	0.282416	0.12167	0.0363131	0	3.88025	0	1.08655	0.0545821	21.3472	31.5281	39.6211	41.8152	0.0246959	42.4132	42.0635	21.2412	8.02322	0.568399	3.71552	3.00222	2.50507
ADGRG1		NM_001145773	0.0194447	57662137	57698951		NP_001139245.1	692		chr16		0	0	0	0	0.103188	0	0.238844	0	0.65568	0.105753	0.328005	0.0741284	0.0809159	0.132172	0.242123	0.22718	0.22395	0	0	0.037862	0	0.384624	0.642404	0.0655357	0	0.188434	0.372969	0.807636	1.19206	0	0.713524	1.22805	0.94116	0.649894	0	0.0859723	0	0
ADGRG1		NM_201525	0.0443094	57662137	57698951		NP_958933.1	687		chr16		0.254946	0	0.191614	0	0.0724728	0	1.62787	0.286921	0.60597	0.249037	1.44201	0	0	0.0603382	0.128831	0	0	0.296254	0	0	0	0.0507091	0	0	0	2.16661	0.879834	3.82791	1.97864	0.894657	9.34497	4.48265	2.58714	0.369471	0.296563	1.37961	0.123897	0.454636
ADGRG1		NM_201524	0.0153345	57662137	57698951		NP_958932.1	687		chr16		0	0	0	0	0.0902393	0	0.395537	0.0678968	0.230947	0.0500282	0.268289	0	0	0	0	0	0	0	0	0	0	0.0428994	0	0	0	0.38359	0.520041	1.01831	1.1108	0	1.50196	2.69151	0.937303	0	0.526494	0.249471	0	0.22009
ADGRG1		NM_001145771	0.0588543	57662137	57698951		NP_001139243.1	693		chr16		0	0	0	0	0	0.0763124	0.934898	0.243962	0	0.236156	1.29242	0	0	0	0	0	0	0	0	0	0	0.0873282	0	0	0	1.28802	1.30058	4.74029	3.29078	0	6.48987	3.53712	2.9903	0.318569	0.136916	0.820968	0.33407	0.418058
ADGRG1		NM_001145772	0.0303815	57662137	57698951		NP_001139244.1	687		chr16		0	0	0	0	0.0276653	0	0.259276	0.0902138	0.52144	0.0459075	0.316826	0	0	0.0470359	0	0	0	0	0	0	0	0.130013	0	0	0.0517414	0.230635	0.299722	0.890997	1.1466	0.207499	1.99082	1.37426	1.17978	1.29776	0.244133	0.0869816	0	0.254642
ADGRG1		NM_001290144	0.0228885	57673206	57698951		NP_001277073.1	512		chr16		0	0	0.211336	0	0	0	0	0.114302	0.281365	0	0.143305	0	0.153209	0.0612212	0.180095	0	0	0.0502956	0.0278129	0	0	0.767225	0.405862	0	0	0.445979	0.34108	1.00678	1.37278	0.120426	1.72341	1.11865	0.954508	0.39317	0	0	0.0771841	0
ADGRG1		NM_001145774	0.0256819	57673206	57698951		NP_001139246.1	687		chr16		0.095207	0.235958	0	0	0.361369	0	0	0	0	0.0595813	0	0.283782	0	0	0	0.768141	0	0	0	0	0	5.58924	0	0	0	0	0	0	0	0	0	0	0.0427064	0	0.21827	0.206406	0	0.074996
ADGRG2		NM_001184835	0.576051	19007424	19140755		NP_001171764.1	979		chrX		0.0959753	0	0.0550467	0	0	0.08045	0.0499943	0.101591	0.208057	0.124111	0	0.0400278	0.0556355	0.0589449	0.0344372	0.0611304	0	0.0858689	0.0139224	0	0.0401343	0.076371	0	0.286221	0.0330122	0.0607115	1.3988	0	0.0297841	0	0.0330078	0.0593998	0.0568155	0	0.139818	0.498887	0.0177557	0.0492185
ADGRG2		NM_001184836	0.0284821	19007424	19140755		NP_001171765.1	993		chrX		0	0	0	0	0	0	0	0	0	0	0.141171	0	0	0	0	0	0	0	0	0	0	0	0	0	0	0	0.0116661	0	0.31949	0	0	0	0	0	0	0.693674	0	0
ADGRG2		NM_001184837	0.0281678	19007424	19140755		NP_001171766.1	987		chrX		0	0	0	0	0	0	0	0	0	0	0	0	0	0	0	0	0	0	0	0	0	0	0	0	0	0	0	0	0	0	0	0	0	0	0	0	0	0
ADGRG2		NM_001079860	0.0355117	19007424	19140755		NP_001073329.1	995		chrX		0	0	0	0	0.0280912	0	0	0	0	0	0	0	0	0	0	0	0	0	0	0	0	0	0	0	0	0	0	0	0	0.0434759	0	0	0	0	0	0	0	0
ADGRG2		NM_001184833	0.0335946	19007424	19140755		NP_001171762.1	1001		chrX		0	0	0	0	0	0	0	0	0	0	0	0	0	0	0	0	0	0	0	0	0	0	0	0	0	0	0	0	0	0	0	0	0	0	0	0.139996	0	0
ADGRG2		NM_001079859	0.0193873	19007424	19140755		NP_001073328.1	1003		chrX		0	0	0	0	0	0	0	0	0	0	0.0513789	0	0	0	0	0	0	0	0	0	0	0	0	0	0	0	0.0875232	0	0	0	0	0	0	0	0	0.266016	0	0
ADGRG2		NM_001184834	0.186085	19007424	19140755		NP_001171763.1	966		chrX		0	0.0526248	0	0.0719058	0.0293688	0	0	0	0	0	0.040791	0	0	0	0	0	0	0	0	0.0390427	0	0	0.435418	0	0	0	0	0	0	0	0	0	0	0.106806	0	0.333101	0	0
ADGRG2		NM_001079858	0.0157694	19007424	19140755		NP_001073327.1	1017		chrX		0	0	0	0	0	0	0	0	0	0	0.049705	0	0	0	0	0	0	0	0	0	0	0	0	0	0	0	0	0	0	0	0	0	0	0	0	0	0	0
ADGRG2		NM_005756	0.0769508	19007424	19140755		NP_005747.2	1014		chrX		0.0682055	0	0	0	0	0	0	0	0	0	0.397156	0	0	0	0	0	0	0	0	0	0	0	0	0	0	0	0.0993999	0.0627093	0.270682	0	0	0	0	0	0.360999	0.536838	0	0
ADGRG3		NM_001308360	0.717457	57702156	57723290		NP_001295289.1	429		chr16		0	0	0	0	0	0	0.0241095	0.0192842	0	0.0290758	0.0335403	0	0	0	0.0348277	0	0	0.0599588	0.241908	0.0571647	0	0.198307	0	0	0	0.0375837	0.0997064	0.207708	0.0321207	0	0.108917	0	0.0431063	0.203619	0.0751821	0	0.0703401	0
ADGRG3		NM_170776	0.282543	57702156	57723290		NP_740746.4	549		chr16		0	0	0.117245	0	0.190555	0	0	0	0.108398	0	0	0	0	0.0446902	0	0.0322799	0	0	0	0	0	0.0214906	0.342893	0	0	0	0	0	0	0.0523247	0	0.107378	0	0	0	0.0492771	0	0
ADGRG4		NM_153834	1	135383121	135499047		NP_722576.3	3080		chrX		0	0	0.0422819	0.0263945	0.00703953	0.0113869	0.0186795	0.00737146	0.0563636	0.00834115	0.0254713	0.0301057	0	0.0154391	0	0.00901495	0	0.00971145	0	0.0191266	0	0.0264006	0.151405	0.00864607	0.00989435	0	0.0674913	0.0380647	0	0.0515915	0	0.0170415	0	0.107404	0	0	0	0
ADGRG5		NM_001304376	0.76077	57576332	57611100		NP_001291305.1	528		chr16		0.103595	0	0	0	0.0934138	0	0.138091	0.0164017	0.153421	0.033093	0.0645703	0.681592	1.40949	0.732832	0.673977	0.624045	0.826663	0.993784	0	1.47078	0	0.119942	0.374104	0.292939	0	0.124479	0.417445	0.222625	0.296869	0.0259954	0.0720942	0.0916431	0.0473886	0.10773	0.075509	0	0.0619096	0.105535
ADGRG5		NM_153837	0.23923	57576600	57611100		NP_722579.1	528		chr16		0	0	0.0376766	0	0.0455961	0	0	0	0.0781322	0.037202	0.038016	0.0780789	0.183117	0.0929438	0.106578	0.0459586	0.129954	0	0.114302	0.0797236	0	0.0616882	0.225058	0	0	0	0.122434	0.045383	0.103204	0.0467194	0.0665557	0	0	0.0735832	0	0.032934	0	0
ADGRG6		NM_001032395	0.130817	142623055	142767403		NP_001027567.1	1222		chr6		0	0	0	0	0	0	0	0	0.068862	0	0	0	0	0.141699	0	0	0.153936	0.17251	0.0334599	0.0689161	0	0	0.0493016	0	0.108787	0	0	1.22157	0.405697	0.290252	0.0746758	0	0.0973264	0.789402	0	0.450456	0.0603827	0
ADGRG6		NM_198569	0.0591315	142623055	142767403		NP_940971.1	1250		chr6		0	0	0	0	0	0	0	0	0	0	0	0	0	0.178538	0	0	0.182071	0	0	0.0483234	0	0	0	0	0	0	0	2.41358	0.287234	0.380885	0.147687	0	0.065795	0	0	1.7038	0.0335057	0.239624
ADGRG6		NM_001032394	0.452113	142623055	142767403		NP_001027566.1	1193		chr6		1.41438	2.20378	0	0.675562	0.145659	0.368353	0.527693	0.0540508	0	0.0496477	0.547983	0.321773	0	2.53989	0	0.144902	0.9192	0	0	0	0	0.0602498	1.84123	0	0.825862	1.71679	1.0445	1.21972	0.837262	0.812962	1.07639	3.24777	1.73969	0.75978	2.11179	1.23341	2.67002	0.0904818
ADGRG6		NM_020455	0.357938	142623055	142767403		NP_065188.4	1221		chr6		0	1.91836	0.0946308	0	1.74806	0	0.130625	0	0	0	0	0.154724	1.09327	3.07305	1.81022	1.33519	1.05981	0	0	0	0	0	0	0.933727	0	1.54402	0.0516605	2.39829	0.589336	1.04942	2.02358	1.11092	1.14625	0	0	4.50405	1.44014	1.87524
ADGRG7		NM_032787	0.435989	100328432	100414323		NP_116176.2	797		chr3		0	0	0	0	0	0	1.89745	0	0	0	0	0	0	0	0	0	0	0	0	0	0	0	0	0	0	0	0.0127202	1.68027	0	0	0	0	0	0.0750386	0	0	0	0
ADGRG7		NM_001308362	0.564011	100354381	100414325		NP_001295291.1	502		chr3		0	0.0310384	0	0	0	0	6.79899	0	0	0	0	0.0604247	0	0.0166519	0	0.026662	0	0	0	0	0	0.0463397	0	0	0	0	0	0.537494	0	0.0217366	0	0	0	0	0	0	0	0
ADGRL1		NM_014921	0.892132	14258548	14316997		NP_055736.2	1469		chr19		14.4499	0.0952396	1.0654	5.36532	6.38156	0.454565	1.00478	8.80032	5.70798	4.37372	3.24115	2.50427	7.18569	7.36064	9.80828	1.67833	4.67854	0.285907	1.36619	0.337825	3.67526	0.858487	1.95862	4.09265	1.27499	1.81694	4.55994	9.99062	3.44228	4.21654	2.13378	5.73558	10.723	3.58422	0.694889	7.23099	1.70935	2.96423
ADGRL1		NM_001008701	0.107868	14258548	14316997		NP_001008701.1	1474		chr19		1.94295	0	0.592034	1.80819	0.479543	0	1.37405	1.4315	0.948561	0.619568	0.373245	0.195805	0.257214	2.24022	0	0.288247	0.160878	0	0.268501	0	0.0281142	0	0.636385	0.458728	0.415421	0.13138	0.0777329	0.514726	0.0898932	0.385301	0	1.47222	2.10707	0	0	0.131244	0	0.4269
ADGRL2		NM_001297704	0.661389	82165454	82458422		NP_001284633.1	1403		chr1		0	1.99977	2.17543	4.48057	0.053148	0.318347	0.024381	2.65358	0.836955	0.535039	1.82462	0.0160586	0	0.0117247	0	0	0	0	0.0621452	0	0.0787136	0	0	0	4.34344	0	1.20386	0.0124288	0.0698876	0.0145982	0.14783	2.71866	0	0	1.19729	0	0.952792	0.0788156
ADGRL2		NM_001297706	0.220598	82266081	82458422		NP_001284635.1	1123		chr1		0	0	0.179666	0	0	0.441702	0	0	0.910676	0	0	0	0.0494049	0	0	0	0	0.296397	0	0.0448102	0	0.0382616	0.0890284	0.0935802	0.326168	0	0.0269511	0	0	0.0181688	0	0	0	0.0819929	0.0218234	0.0463173	0	0
ADGRL2		NM_012302	0.0356807	82266081	82458422		NP_036434.1	1403		chr1		0.459769	0	0	0	0	0	0	0	0	0	0	0	0	0	0	0	0	0	0	0	0	0	0	0	0	0	0.06605	0	0	0	0	0	0	0	0	0	0.0432205	0
ADGRL2		NM_001297705	0.0823325	82266081	82458422		NP_001284634.1	1177		chr1		0	0	0	0.291661	0	0	0	0.119374	0.0521773	0.0716775	0.272688	0	0	0	0	0	0	0	0	0	0	0	0	0	0.355929	0	0.0636867	0	0	0.0292049	0	0.25921	0	0	0.073994	0	0.346923	0
ADGRL3		NM_015236	1	62362838	62938168		NP_056051.2	1469		chr4		0.0192297	0.0142296	0.11711	0.0598425	0.0125716	0.0399154	0.0594489	0.0132989	6.89186	0.0287166	2.43817	0.0378299	0	0.0130605	0	0.00995688	0	0.0936088	0.0240412	0.0179635	0	0.0840171	0.112928	0.0502849	0.0479327	0.0141771	0.0625995	0.0103533	0.0142856	0.091541	0.0161034	0.0983862	0	0.119022	0	0.107927	0.0123541	0
ADGRL4		NM_022159	1	79355448	79472495		NP_071442.2	690		chr1		0	0	0.0551347	0	0	0	0.427133	0	0.0382197	0.0123456	0	0.0481317	0	0	0	0	0	0.0246984	0.0161908	0.0202596	0	0.0373839	0.0837154	0.0238896	0.372542	0	0.0526229	0.305311	0	0.0287804	0	0	0	0.0400264	0	0	0.0198653	0
ADGRV1		NR_003149	0.7517	89854616	90460033		na	na		chr5		0	0.0504689	0.0586985	0	0.288849	0.0445584	0.0118209	0.00991078	0	0.0344589	1.08701	0.0203103	0	0	0.114683	0.00949595	0.0101936	0.253461	0	0	1.0106	0.0284499	0	0.0427103	0.00706408	0.0108958	0.00769376	0.0102042	0.00408101	0.00864417	0.00651391	0.0192842	0.00445798	0	0.00930611	0.00520651	0.0771037	0.0613592
ADGRV1		NM_032119	0.2483	89854616	90460033		NP_115495.3	6306		chr5		0.390698	0	0	0	0.190027	0.0443769	0	0	0.140507	0	0.868571	0	0.212597	0.217828	0.207377	0	0	0	0.00928436	0.0189022	0.198891	0.0116926	0.118059	0	0	0	0.0238309	0	0	0.0208578	0	0	0	0.108576	0	0	0	0
ADH1A		NM_000667	1	100197522	100212185		NP_000658.1	375		chr4		0	0	0	0	0	0	0	0	0	0	0	0	0.0939502	0	0	0	0	0	0	0	0	0	0	0	0	0	0.0178706	0	0	0.0141933	0	0	0	0	0	0	0	0
ADH1B		NM_000668	0.719792	100227543	100242599		NP_000659.2	375		chr4		0	0	0.0986272	0	0	0	0	0	0	0	0	0	0	0	0	0	0	0.065175	0	0	0	0.024376	0	0	0	0	0	0	0	0.0242069	0	0	0	0	0	0	0	0
ADH1B		NM_001286650	0.280208	100227543	100242599		NP_001273579.1	335		chr4		0	0	0	0	0	0	0	0	0	0	0	0	0	0	0	0	0	0	0	0	0	0	0	0	0	0	0.0414808	0	0	0	0	0	0	0	0	0	0	0
ADH1C		NM_000669	1	100257648	100274202		NP_000660.1	375		chr4		0	0.10867	0	0	0	0	0.0569201	0	0	0.0351548	0	0	1.296	0	0	0	0	0.187492	0	0	0	0.0557411	0.120116	0	0	0	0.0491193	0	0	0.0365577	0	0	0	0.0930153	0	0	0	0
ADH4		NM_000670	0.551193	100044807	100065449		NP_000661.2	380		chr4		0	0.0787674	0	0	0	0	0	0	0	0	0	0	0	0	0	0	0	0	0	0	0	0	0	0	0.0396756	0	0.0469374	0	0	0	0	0	0	0	0	0	0	0
ADH4		NM_001306172	0.448807	100044807	100065449		NP_001293101.1	399		chr4		0	0	0.0542884	0	0	0	0	0	0	0	0	0	0	0.0469801	0	0	0	0	0	0	0	0.0804166	0	0	0	0	0.0294684	0	0	0	0	0	0	0.0896762	0	0	0	0
ADH5		NM_000671	1	99992129	100009939		NP_000662.3	374		chr4		10.7196	17.5472	13.442	13.8329	10.2816	4.08767	25.0272	11.5128	8.18273	12.2899	21.3972	6.32415	15.28	27.2351	6.95967	10.7891	15.5894	9.9457	54.4733	14.2046	12.4541	19.6439	2.68361	1.80831	8.00983	8.10879	10.9139	8.3865	8.10314	3.76979	10.6757	13.3052	14.8374	6.42248	6.38319	13.3622	14.0669	7.89981
ADH6		NM_001102470	0.533773	100123794	100140403		NP_001095940.1	375		chr4		0	0	0.238548	0	0	0	0	0	0.0352321	0	0	0.0499983	0.310675	0	0	0	0	0.0235033	0	0	0	0.0271061	0.103317	0	0	0	0.0288317	0	0	0.0144711	0	0	0	0	0.18256	0	0	0
ADH6		NM_000672	0.466227	100125878	100140403		NP_000663.1	368		chr4		0	0	0	0	0	0	0	0	0	0.043417	0	0	0.194724	0	0	0	0	0	0	0	0	0.0385448	0	0	0	0	0	0.0444129	0	0.0288886	0	0	0	0	0	0	0	0
ADH7		NM_001166504	0.150936	100333417	100356291		NP_001159976.1	394		chr4		0	0.0524511	0	0	0	0	0	0	0	0	0	0	0	0	0	0	0	0	0	0	0	0	0	0	0	0	0	0	0	0	0	0	0	0	0	0	0	0
ADH7		NM_000673	0.849064	100333417	100356667		NP_000664.2	386		chr4		0	0	0	0	0	0	0	0	0	0.0173137	0	0	0	0	0	0	0	0	0	0	0	0.0219009	0	0	0	0	0.0147153	0	0	0.012044	0	0	0	0.107854	0	0	0	0
ADHFE1		NM_144650	1	67344717	67381044		NP_653251.2	467		chr8		0.0671929	0.164653	0.198297	0.715938	1.58649	0.15369	0.0433858	0.0399553	0.0519323	0.115998	0.123866	0	0.147576	0.0998248	0	0	0	0.0452156	0.16922	0.0457344	0	0.190702	0	0	0	0.409489	0.0795143	0.112649	0.406081	0.974981	0.32543	0.102843	0	0.0874336	0.0566724	0	0.122056	0.390885
ADI1		NM_001306077	0.0161892	3501689	3521518		NP_001293006.1	173		chr2		0.517793	0.170212	0.153014	0	0.359655	0.0300081	1.56592	0.189879	0.154247	0.408478	0.264092	0.0731484	0.41386	0.271692	0.442278	0.301782	0.174538	0.0395426	0.126413	0.225559	0.100722	0.264957	0.283341	0.320734	0.0460473	0.274809	0.275401	0.142426	0.274798	0.255731	0.239115	0.221489	0.317619	0.262888	0.125861	0.279504	0.163452	0.257928
ADI1		NM_018269	0.983811	3501689	3523350		NP_060739.2	179		chr2		67.1347	33.7851	10.8492	6.52421	30.4598	4.87113	20.8665	12.0325	21.5897	15.8238	22.9881	9.97317	23.9848	33.1936	13.2384	17.1213	16.3987	12.3385	33.9633	26.4982	6.57823	11.5759	19.1359	12.0425	6.74886	14.6176	18.6704	7.66784	15.2346	7.12231	24.9424	28.2401	31.3426	20.0692	8.54067	7.65505	11.5401	14.1021
ADIG		NR_130907	0.166667	37209837	37217106		na	na		chr20		0	0	0	0	0	0	0	0	0	0	0	0	0	0	0	0	0	0	0	0	0	0	0	0	0	0	0	0	0	0	0	0	0	0	0	0	0	0
ADIG		NM_001018082	0.833333	37209837	37217106		NP_001018092.1	80		chr20		0	0	0.12286	0	0	0	0	0	0.270767	0	0	0	0	0.0490188	0	0	0	0	0	0	0	0.108176	0	0	0	0	0	0	0	0	0	0	0	0.19684	0	0	0	0
ADIPOQ		NM_004797	1	186560462	186576252		NP_004788.1	244		chr3		0	0	0.112993	0	0.147905	0	0	0	0.0735711	0	0	0	0	0.00666868	0	0	0	0.0310602	0	0	0	0.0225315	0.285508	0	0	0	0.0381101	0	0	0.0204188	0	0	0	0.189476	0	0	0	0
ADIPOQ-AS1		NR_046662	1	186569675	186573912		na	na		chr3		0	0	0.113944	0	0	0	0	0	0.0535619	0	0.0137175	0.0193775	0	0	0	0	0	0.0274646	0	0	0	0.0272453	0.0956672	0	0	0	0.0244222	0	0	0.0222091	0	0	0	0.317711	0	0	0	0
ADIPOR1		NM_001290553	0.8121	202909952	202927112		NP_001277482.1	375		chr1		52.4493	19.0152	10.5131	7.69827	42.6438	3.44904	41.8285	22.775	22.8538	28.3521	27.7928	14.4627	21.6792	40.8627	19.1129	16.7792	24.8466	15.2505	34.979	10.8531	8.87872	16.2307	17.3822	14.9332	14.5796	30.4846	17.0614	22.5502	27.3061	38.5621	35.9384	35.2309	20.2129	9.04283	8.15861	35.7713	34.9651	36.7407
ADIPOR1		NM_015999	0.177198	202909952	202927524		NP_057083.2	375		chr1		2.27809	0.0745782	1.86569	5.0448	5.5788	8.66102	1.6468	7.06449	6.39249	5.4359	5.88184	2.78039	3.04234	3.78458	0.549801	4.21956	3.92018	0.20783	5.03662	0.318245	10.3905	1.14595	0.47684	2.98899	5.49386	5.03262	0.614518	2.47695	2.2897	2.14642	14.5175	7.66672	3.13425	2.46191	2.75383	17.9966	3.21412	7.41299
ADIPOR1		NM_001290557	0.00333267	202909952	202927524		NP_001277486.1	375		chr1		0	0	0	0.373693	0.174735	0	0	0.264622	0	0.0572998	0.275063	0	0	0	0	0	0	0	0.276868	0	0	0	0	0.074429	0	0.0563306	0	0.118713	0	0	0.436589	0.169685	0	0	0	0.531721	0.255576	0
ADIPOR1		NM_001290629	0.00736891	202909952	202927700		NP_001277558.1	375		chr1		0	0	0	0.616359	0.233772	0	0	0.445411	0	0.373609	0.45565	0.242562	0	0.15684	0	0.130984	0.0574264	0	0	0	0.556678	0.104227	0.182493	0	0.521304	0.126422	0.178082	0.216076	0.313555	0.233072	0	0.158743	0.37851	0	0.311058	0.125967	0.181848	0.221642
ADIPOR2		NM_024551	1	1800246	1897845		NP_078827.2	386		chr12		7.41692	6.08649	3.66338	6.7441	7.85757	3.59099	16.286	12.1067	4.34101	7.39979	9.50079	7.79952	16.9842	9.75076	5.48722	8.42351	10.7275	4.42505	14.5882	7.55922	5.51738	5.86957	3.13149	4.08183	11.646	11.4567	12.1937	11.0045	7.60729	9.81797	10.0238	13.6528	14.1426	5.25626	4.67556	9.21396	18.5307	7.23654
ADIRF		NM_006829	1	88728187	88730666		NP_006820.1	76		chr10		14.3933	2.39715	0.435506	1.56731	166.412	0.336207	0.547354	0.316581	0	0.175456	0.312719	0.167557	13.4574	109.96	0.402797	0.700598	41.1642	2.42269	0	0	0	0.118827	0.36664	0	0.332526	0.192142	0.376223	0.342407	0	0.0538632	0	0	0.326248	0.663785	0.176983	0.423431	0.467526	6.47607
ADK		NM_001202450	0.123736	75910942	76469061		NP_001189379.1	305		chr10		1.21068	11.8619	0	1.01742	3.75915	0.24504	0.163418	0.441356	0.242599	0	0.252909	0.772821	0	0.703064	0	0.723461	0.273968	54.0697	2.75381	31.9072	1.58143	7.90201	0	0	0.799466	0	1.71591	0	0	0	0	0.136859	0	0	0	0.5974	0.352703	1.58474
ADK		NM_006721	0.623669	75910942	76469061		NP_006712.2	362		chr10		10.2815	38.535	2.74975	3.96539	24.5426	0.789252	7.47591	4.94995	2.57898	4.29027	4.03767	3.4009	4.32169	14.3134	4.77098	6.9409	7.33863	22.5007	29.255	2.91234	2.40799	3.18463	3.93714	2.67916	8.92352	2.39443	1.08936	3.1709	1.10859	0.98193	1.567	2.42873	2.50759	2.94352	2.9131	5.25669	5.27838	9.03077
ADK		NM_001202449	0.0211313	75936246	76469061		NP_001189378.1	327		chr10		0	0.261824	0	0	0	0	0	0	0	0.0431432	0.0499716	0	0	0.0992822	0	0	0	0.367399	0.139367	0	0	0.192124	0	0	0.180256	0	0.0318848	0	0	0.777722	0	0	0.0952522	0.0996829	0.711088	0.0806114	0	0
ADK		NM_001123	0.231463	75936246	76469061		NP_001114.2	345		chr10		1.08097	6.67861	0.613456	1.12686	3.61542	1.87064	0.981086	1.24401	0.819782	2.00289	1.22774	0.876649	0.669109	2.32319	0.802238	2.50958	1.91473	0.497273	13.9308	0.526073	6.51432	0.937194	0.5252	0.48448	3.5372	1.11427	0.839883	0.717467	0.358629	0.0939067	0.819684	1.10401	0.64671	0	0	1.95081	1.79795	5.13557
ADM		NM_001124	1	10326526	10328949		NP_001115.1	185		chr11		0	21.8557	24.3028	7.40139	5.30734	19.8126	8.98608	5.19545	13.4461	8.40803	10.5246	0.71938	2.02864	10.8908	0.290749	1.8515	14.827	3.04141	0.171906	0.28361	0	0.29014	1.72044	2.58519	5.31641	1.18161	5.90787	0.0360039	3.1688	9.66913	0.0878451	3.42848	4.02383	3.59363	10.1447	5.27642	2.68077	0.33069
ADM2		NM_024866	0.365603	50919984	50924866		na	na		chr22		0	0.0396787	0.195086	0.232775	0.226347	0.138616	0.0344146	0.302551	0.126667	0.134643	0.117192	0.375315	0	0.138144	0.0394516	0.189104	0.252469	0.0485706	0	0.0235039	0.0702565	0.269716	0.406539	0.190878	0	0.143601	0.137839	0.1014	0.12367	0.225298	0.0632711	0.13864	0	0	0.0946978	0	0.136951	0
ADM2		NM_001253845	0.634397	50920152	50924866		NP_001240774.1	148		chr22		0.230062	0	4.87477	3.49614	0.800415	0	0	1.05617	0	0.17639	0.265685	2.07105	0.768272	0.790126	0.998947	0.438445	2.06708	0	1.69146	0	0.83601	0	3.06843	0.96501	0	0.0643006	0	0.296329	0	0.463248	0	0.0972214	0	0.191841	0.0750357	0.360967	0.93859	0.449508
ADM5		NM_001101340	1	50191941	50194247		NP_001094810.1	153		chr19		1.70972	0.0900201	0.295527	0.838497	1.38876	0.357232	1.69187	0.45246	0.843368	0.715427	0.945537	0.544278	0.482575	1.54839	1.83088	1.0016	0.919941	0.0848299	5.98472	1.0423	1.17066	1.8706	1.33005	0.565989	0.761929	0.441901	0.92395	1.82454	0.386666	1.03335	0.147627	1.18211	1.60605	0.340766	2.51342	0.761552	0.462651	0.190042
ADNP		NM_001282532	0.0276208	49505454	49526328		NP_001269461.1	1102		chr20		0	0.144547	0.238765	0.385164	0.195894	0	0	0.219338	0.194924	0.0818709	0.250908	0.0205259	0.0403662	0.248811	0.498955	0.244856	0.0854535	0.658982	0.340919	0	0	0.0954258	0	0.527144	0.0869014	0.303048	0.113836	0	0.0545754	0.058226	0.807259	0	1.08532	0.838257	0.0962153	0.221431	0.528674	0.683618
ADNP		NM_181442	0.207556	49505454	49547527		NP_852107.1	1102		chr20		0.707722	6.85989	0.145489	0.0624024	1.6565	1.43591	1.96712	0.936078	5.62558	2.13004	1.96886	0.827607	0.563301	7.0836	0.3138	2.07675	1.0507	21.6377	16.4281	0.0433445	0.403893	0.632949	2.95866	0.551757	0.699404	1.74431	1.95439	0.264704	0.628242	0	3.52791	1.05887	0.521236	1.82307	0.138362	0.989063	0.414295	0.81754
ADNP		NM_015339	0.654141	49505454	49547527		NP_056154.1	1102		chr20		13.133	5.13164	3.22452	4.60399	7.27857	1.22839	5.59921	6.41829	0.911547	5.51669	6.21323	4.56758	7.98155	8.62128	5.16407	9.43324	6.93324	2.66353	3.07078	9.78506	3.8339	7.9508	0.647501	2.26928	4.35233	6.92175	7.62873	6.78898	8.93461	5.612	5.41739	8.1698	10.5644	2.12721	2.93428	6.68362	4.78448	4.27788
ADNP		NM_001282531	0.110682	49505454	49547527		NP_001269460.1	1102		chr20		1.4887	1.54792	0.165553	0.343786	0.902502	0	1.92762	2.23531	0.059066	0.655852	0.97295	0.633911	0.721505	0.678039	1.63273	1.71125	0.731059	0	0.374657	0.672989	0.702509	1.36608	0	0.292878	1.3005	0.776652	1.08566	1.20507	0.707162	0.0641546	0.344416	1.03288	0.883641	0	0.61711	0.90693	0.621056	1.53356
ADNP-AS1		NR_110008	0.189548	49547520	49561671		na	na		chr20		0	0	0	0	0	0	0	0	0.193659	0	0	0	0	0	0	0	0.281018	0	0	0	0.186823	0.591128	0	0.384292	0	0	0.101659	0.13247	0	0.239192	0.724875	0	0	0.614947	0.181718	0	0	0
ADNP-AS1		NR_110009	0.164137	49547520	49561671		na	na		chr20		0	0.851355	0.314634	0	0.229798	0	0	0	0	0	0	0	0	0	0	0	0	0.859268	0.258078	0.166254	0	0	0.228577	0	0	0.127366	0	0	0	0.0623686	0	0	0	0	0	0	0	0
ADNP-AS1		NR_110007	0.646315	49547520	49561671		na	na		chr20		0.760002	0.442317	0	0	0.517586	0.258171	0.262772	0.517971	0	0.602082	0.56816	0.751986	0.249997	0.345151	0.261432	0.901753	0.416803	0	0.917493	0	0	0.193284	0	0	0.2757	0.109071	0.0921151	0.150404	0.543565	0	0	0.354073	0.481052	0	0.129672	0.167024	0.294959	0.189102
ADNP2		NM_014913	1	77866914	77898228		NP_055728.1	1131		chr18		4.97895	6.28856	1.7743	4.21189	4.85682	1.77019	4.75646	3.43469	2.08134	3.64842	3.98962	1.93722	6.20641	10.7833	4.9381	4.30749	2.16766	5.72713	9.77595	4.01444	3.09787	5.15203	1.72641	1.43923	3.94046	3.35803	2.4112	4.20188	2.52101	3.67423	3.52129	3.37049	3.70992	1.55216	1.89689	6.13525	3.34303	3.95491
ADO		NM_032804	1	64564515	64568239		NP_116193.2	270		chr10		2.29656	5.6443	1.7249	3.19962	2.66308	1.31647	3.07085	3.29088	4.71986	4.0559	2.81595	1.28264	3.86964	5.38948	2.33766	1.82363	2.67836	10.5813	7.06491	5.23031	1.71569	3.34775	0.959329	0.686042	1.78439	3.30272	2.26656	4.37869	2.10094	1.6436	2.93138	2.7802	3.08043	1.97842	1.43751	2.71433	1.78192	4.98722
ADORA1		NM_001048230	0.79436	203096835	203136533		NP_001041695.1	326		chr1		0.248952	0.0370347	0.169541	0.070347	0.277273	0.511951	0.500097	0.406388	2.5174	3.09687	1.81051	0	0.0399086	0.497896	0.674843	0.04283	0	0	0.0176924	0	0	0	0.331417	0.192531	0.0699663	0.0209822	0.722111	0.0473238	0.171446	0	0.0540921	0.229148	0.874985	0.350967	0	0.594962	0.899382	4.46716
ADORA1		NM_000674	0.20564	203096835	203136533		NP_000665.1	326		chr1		0	0	0	0	0.0723003	0	0	0.125059	0.0495612	0.607774	0.125771	0	0	0.0168817	0	0	0.0404983	0.113268	0	0.0286548	0	0.290596	0.31312	0	0	0	0.115307	0	0	0.119947	0	0	0	0.152689	0.0878069	0	0	0.327278
ADORA2A		NM_001278500	0.386189	24819564	24838328		NP_001265429.1	412		chr22		0.278146	0.097405	0.898676	2.39625	0.423626	0	0.0661817	0.297874	0.140098	0.366984	0.0517535	0.057363	0.0635512	0.288561	0	0	0	0	1.87204	0.289305	0.318212	1.05796	0.796154	3.17474	0	0.0925617	0.0193087	0	0.0787517	0.425951	0	0.0906273	0.275469	0	0.108736	7.80698	4.85421	0.719189
ADORA2A		NR_103544	0.409945	24823529	24838328		na	na		chr22		0	0.289302	1.18253	3.55217	0.595347	0.129377	0.466611	0.233752	0	0.135585	0.503085	0.060858	0.142563	0.0478715	0.224225	0.0542922	0	0	11.0554	1.71549	0	5.47098	5.02712	0.456017	0	0.0457878	0.0731657	0.133826	0.207784	0.0288417	0.239773	0.173848	0	0	0	2.72966	0	0.4336
ADORA2A		NR_103543	0.04778	24823529	24838328		na	na		chr22		0.171172	0	0.875249	0	0	0	0	0	0.248423	0	0.154031	0	0	0.132664	0	0	0	0	0.902722	0	0	0	1.63702	2.29949	0	0	0	0	0	0	0	0	0	0	0	0	0	0
ADORA2A		NM_001278499	0.043844	24823529	24838328		NP_001265428.1	412		chr22		0	0	0	0	0	0	0	0	0	0	0	0	0	0	0	0	0	0.19681	0.0701072	0	0	0	0	0	0	0	0	0	0	0	0	0	0	0.124437	0	0	0	0
ADORA2A		NM_000675	0.00251033	24823529	24838328		NP_000666.2	412		chr22		0	0	0	0	0	0	0	0	0	0	0	0	0	0	0	0	0	0	0	0	0	0	0	1.01058	0	0	0	0	0	0	0	0	0	0	0	0	0	0
ADORA2A		NM_001278498	0.0801053	24828086	24838328		NP_001265427.1	412		chr22		0	0	0.155533	0	0.0656435	0	0	0	0.0951782	0	0	0	0	0	0.143947	0.0625874	0.062042	0	0.0769048	0.0511782	0	0.0509427	0.359847	0	0	0	0.0923001	0	0	0.0876184	0	0	0	0.106887	0	0	0	0
ADORA2A		NM_001278497	0.0296256	24828086	24838328		NP_001265426.1	412		chr22		0	0	0	0	0	0	0	0.0356002	0	0.0275137	0	0.0593648	0.057384	0	0	0	0	0	0	0	0	0.0552769	0	0	0	0	0.0592392	0	0.0509074	0	0	0	0	0	0	0	0.0827883	0
ADORA2A-AS1		NR_028484	0.671672	24825177	24890783		na	na		chr22		0.0563283	0	0.155313	0	0	0	0	0.0454303	0.0986426	0.0501168	0.0458017	0	0.0533111	0.0368072	0.0868977	0.0279063	0	0	0	0.0382437	0	0.156418	0.426571	0.0957613	0	0	0.129854	0.0314819	0.0311549	0.0468844	0	0	0.0413247	0.165006	0.0259589	0.126366	0.120131	0.105472
ADORA2A-AS1		NR_028483	0.328328	24834244	24890783		na	na		chr22		0	0	0.133945	0	0.0270568	0	0	0	0	0	0	0.079379	0	0.0262034	0	0	0	0.0823913	0.0493286	0	0	0.144509	0.237922	0.0631085	0	0	0.306904	0	0	0.0445422	0	0	0	0.231865	0	0.208433	0.0435463	0
ADORA2B		NM_000676	1	15848230	15879210		NP_000667.1	332		chr17		0.481167	29.8503	6.74433	13.9844	0.137438	1.82692	11.1374	1.67892	8.9297	6.86082	16.0957	4.39563	7.04656	10.6782	3.16153	3.57666	10.9179	4.54947	1.0025	1.74624	1.85104	1.33967	0.222719	0	0.348408	6.79922	1.53646	0.798065	0.504778	2.17674	0.629476	18.4287	4.18493	2.00907	1.97783	3.61188	14.7349	11.4153
ADORA3		NM_000677	0.723262	112042050	112046743		NP_000668.1	318		chr1		0	0	0.12051	0	0	0	0	0	0.105671	0	0	0	0	0	0	0	0	0	0	0.176263	0	0.0259567	0	0	0	0	0.0284598	0.0191156	0	0.035643	0	0	0	0	0	0	0	0
ADORA3		NM_001302679	0.12574	112042050	112046743		NP_001289608.1	173		chr1		0	0	0	0	0	0	0	0	0	0	0.0330971	0	0	0	0	0	0	0	0	0.131784	0	0	0	0	0	0	0	0	0	0	0	0	0	0.117445	0	0	0	0
ADORA3		NM_001302678	0.150998	112042050	112046743		NP_001289607.1	123		chr1		0	0	0	0	0	0	0	0	0	0	0	0	0	0	0	0	0	0	0	0	0	0	0.149245	0	0	0.023669	0	0	0	0	0	0	0	0.0836494	0	0	0	0
ADPGK		NR_023319	0.555543	73043707	73076126		na	na		chr15		5.73887	2.04854	1.07735	2.91447	3.46728	0	9.18348	3.45807	3.55203	4.77642	5.59499	2.31465	3.48571	5.01707	1.98973	6.00695	3.55851	1.59467	18.2139	5.26098	1.1909	4.93503	13.1932	2.54746	1.88008	4.55575	8.08481	1.75517	3.17929	3.39193	5.07376	5.22112	3.79765	2.43086	3.00996	4.15176	2.46902	2.03416
ADPGK		NR_023318	0.0617104	73043707	73076126		na	na		chr15		0.36382	0	0	0	0.455985	0.7678	0	0.759583	0.379871	0.20523	0.511158	0	0.193117	0.472692	0.428156	0.887827	0.124221	0	0.243212	0.0940891	0	1.01961	0	0.452123	0.263131	0.173562	0.463583	0.339221	0.13506	0.17355	0.3846	0.2461	0.636291	0	0.793746	0.976109	0.584978	0.158822
ADPGK		NM_031284	0.382747	73043707	73076126		NP_112574.3	496		chr15		1.74027	0.248324	0.96016	1.58328	1.27244	1.42175	2.21824	3.22395	2.08636	2.82112	5.0616	1.39541	5.0831	1.65251	1.82787	3.4477	1.24611	0	2.88361	1.335	2.76567	0.262559	0.839785	4.38032	2.75313	5.52467	0.874909	2.54351	3.37047	1.46629	1.74637	4.40294	4.49591	0.773839	1.02527	5.78928	3.77074	2.25304
ADPGK-AS1		NR_040107	1	73075175	73090540		na	na		chr15		0.0975031	0.113141	0.0628056	0	0.25548	0.306551	0.0532229	0.180711	0.0973831	0.113105	0.14045	0.0238243	0.117106	0.0783937	0.0961389	0.217982	0.135035	0.091638	0.124015	0.356013	0.113461	0.443895	0.480117	0.157576	0.0494752	0.118411	0.312777	0.0939334	0.0925528	0.233186	0.0824653	0.0847311	0.159799	0.255675	0.254181	0.176378	0.0624174	0.0905434
ADPRH		NM_001291950	0.259095	119298279	119308792		NP_001278879.1	250		chr3		0	0.0301499	0	0	0.142792	0.203957	0	0	0	0	0.0314539	0	0.0266411	0	0	0.177933	0.0322118	0.439306	0.0424919	0.0468163	0	0	0.346038	0.102463	0	0	0.093072	0	0	0.0566534	0	0.391498	0	0	0	0	0	0
ADPRH		NM_001291949	0.507931	119298279	119308792		NP_001278878.1	357		chr3		0.0698905	0.0612141	0.372262	0	0	0	0	0.0612087	0.0468239	0.107033	0.23491	0	0	0.202029	0.0609852	0	0	0	0	0.073144	0.114776	0	0.291235	0	0	0.766197	0.0273837	0	0.37851	0.0487022	0.0563904	0.217533	0	0.312377	0.178462	0.0422496	0.152967	0
ADPRH		NM_001125	0.232974	119298279	119308792		NP_001116.1	357		chr3		0	0	0	0	0.129957	0	0	0.019124	0	0.0851206	0	0	0	0	0	0.0558284	0	0	0	0	0	0.115136	0	0.136724	0	0	0.0194433	0.0562089	0.244502	0.0236687	0.215536	0	0	0	0	0	0	0.214289
ADPRHL1		NM_199162	0.673368	114076254	114103457		NP_954631.1	272		chr13		3.31508	0.470409	0	0	6.72142	0.103796	0.0917902	0	0	0.169153	0.108886	0.135857	1.25208	3.18758	0.892903	0.374347	0.422842	0.310286	0.36482	0.163984	0	0.286159	0.839036	0.350057	0	0.865922	0	0	0.0695192	0.0614649	0	0	0	0.125338	1.18843	2.34176	0.14141	0.595275
ADPRHL1		NM_138430	0.326632	114076254	114107839		NP_612439.2	354		chr13		0.273615	0.391833	0.211358	0.468217	0	0	0	0.319197	0.193862	0.180142	0.163328	0	0.254153	0.107627	0.401214	0.0808281	0.158025	0.505285	0	0	0	0.399232	0	0	0	0.0793826	0.116798	0.0927759	0	0.073113	0.0893835	0.180231	0	0	0	0.497928	0.117288	0
ADPRHL2		NM_017825	1	36554452	36559533		NP_060295.1	363		chr1		3.9225	1.61819	6.34446	13.0551	7.77767	4.80863	13.0835	11.1479	7.9714	8.76014	17.2384	5.27349	8.76468	6.50133	5.85802	17.2566	9.06972	0.323021	26.8876	4.92486	5.92899	7.71587	6.93232	6.30478	5.14197	4.30173	14.221	7.97474	7.42832	4.54288	10.8435	8.50561	10.0315	3.54726	3.07613	4.03816	10.6333	5.72492
ADPRM		NM_020233	1	10600926	10614875		NP_064618.3	342		chr17		0.670503	6.38353	0.790389	1.75715	1.21626	0.782461	2.38713	1.14673	0.685512	0.931035	1.84822	0.512453	0.832723	2.99484	0.634299	0.889405	1.77994	6.5733	3.47346	2.67714	0.683469	1.21698	1.01107	0.239328	1.44191	0.962042	1.68229	0.492285	1.07719	0.819413	2.08204	1.89025	1.08344	0.965391	0.969195	0.851478	1.23734	1.06236
ADRA1A		NM_033303	0.204097	26605666	26722922		NP_150646.3	475		chr8		0	0	0.0997243	0	0	0	0	0	0.0634354	0	0	0	0	0	0	0	0	0	0	0	0	0.0485602	0	0	0	0	0.0151412	0	0	0.0156243	0	0	0	0.183309	0	0	0	0
ADRA1A		NM_033302	0.174774	26613912	26722922		NP_150645.2	429		chr8		0	0	0.103615	0	0	0	0	0	0	0	0	0	0	0	0	0	0	0.0533618	0	0	0	0.0228203	0	0	0	0	0	0	0	0.0272774	0	0	0	0	0	0	0	0
ADRA1A		NM_033304	0.229724	26623370	26722922		NP_150647.2	455		chr8		0	0	0.0757585	0	0	0.0737804	0	0	0	0	0	0	0	0	0	0	0	0	0	0	0	0.0950458	0	0	0	0	0.0257268	0	0	0.0157057	0	0	0	0	0	0	0	0
ADRA1A		NM_000680	0.391405	26627221	26722922		NP_000671.2	466		chr8		0	0	0.0629543	0	0	0	0.0280684	0	0	0.041289	0	0	0	0.026361	0	0	0	0	0	0	0	0.100579	0.124012	0	0	0	0.0376967	0	0.0446813	0.0206662	0	0	0	0.0866826	0	0	0	0
ADRA1B		NM_000679	1	159343739	159400017		NP_000670.1	520		chr5		0	0.0830342	0.356941	0.76901	0.203045	1.28592	0.417006	0.571033	0.451027	5.07413	1.89041	0.476918	0	0.0401166	0	0.0582381	0.0638988	0.230079	0.0275579	0.0933215	0	0.30359	0.155712	0.0382453	0.159398	0.0344505	0.219598	0.587402	0.0861408	0.726223	0.13262	0.0551396	0.56862	0.305163	1.18281	0.845464	0.588171	0.276672
ADRA1D		NM_000678	1	4201277	4229659		NP_000669.1	572		chr20		0.0644081	0.131609	0.421616	0.775096	0.0591332	0.166218	0.542112	0.496062	2.3722	0.218065	1.04384	0.0749812	0.0731538	0.0643064	0	0.0905057	0.0632476	0.381231	0	0.0693056	0.120069	0.436972	0.452797	0.073128	0	0.0313641	0.15591	0.030185	0.079034	0.109099	0.0355656	0.0353074	0	0.206567	0.431997	1.41943	0.221091	0
ADRA2A		NM_000681	1	112836789	112840662		NP_000672.3	465		chr10		0.328644	0.036591	0.323139	0	0.806761	0.551111	0.0865766	0.0642631	0.0747366	1.72228	0.0593289	0.818727	1.25024	0.122673	0.0403317	0.202802	0.178762	0.222605	0.113005	0.534453	0.0477612	0.638575	0.381406	0.0480659	0.0595667	0.0259918	0.548042	0.078804	0.0618494	0.164867	0.0431264	0.0321245	0.062638	0.191723	0.287687	0.0481616	0	0
ADRA2B		NM_000682	1	96778622	96781984		NP_000673.2	450		chr2		0.423945	0.0293367	0.0721481	0	0.038793	0.0604454	0.0269013	0.070168	0.194184	0.0899678	0.0207187	0.122333	0.0598083	0.0953877	0.0319826	0.0609469	0.039412	0.117632	0.0160585	0.0585085	0	0.183605	0.457016	0	0	0	0.232548	0.0404525	0.0308517	0.112133	0	0.0449376	0.100424	0.154843	0	0.0805437	0	0
ADRA2C		NM_000683	1	3768295	3770253		NP_000674.2	462		chr4		3.41246	0.114378	0.174223	0.101632	2.70553	0.188243	0.0866777	1.7396	0.159722	0.350654	0.066986	0.157871	0.734316	4.70867	1.79155	0.126183	0.155537	2.4807	0.0664098	0.219372	0	0.582832	0.34291	0.103701	0.209337	0.0547922	0.278135	0.0979775	0.731111	1.83349	1.18704	1.76306	0	0.184759	1.33504	4.03732	0.0616137	0
ADRB1		NM_000684	1	115803805	115806667		NP_000675.1	477		chr10		0.16041	0.185155	0.123938	0.549609	0.195602	0.260234	0.133905	0.122145	0.0780355	0.0883889	0.049782	0.178445	0.0768677	0.248751	0.260391	0.20189	0.347987	0.326248	0.0290554	0.244394	0.0709067	1.07709	0.425113	0.116171	0.077512	0.0461823	0.189443	0.0692677	0.0435687	0.18991	0.140246	0.0887974	0.0368743	0.178524	0.237648	0.100881	0.0260948	0.0427927
ADRB2		NM_000024	1	148206155	148208197		NP_000015.1	413		chr5		0	14.6986	0.0915159	2.52561	0.0694314	1.13627	2.59304	0.539376	0.178017	0.782347	0.311748	0	0	0.1855	0	0.294523	0.122761	0.190927	0	3.68742	0	0.133743	0.309299	1.85158	0.204675	0.0982977	0.428972	0.646043	0	0.0708141	0.0653591	0.123787	0.245959	0.249718	0.122338	0.0945454	3.52112	5.49765
ADRB3		NM_000025	1	37820513	37824184		NP_000016.1	408		chr8		0.156361	0.0973969	0.299421	0	0.174392	0.155575	0.316151	0.102274	0.110747	0.255577	0.165788	0.226805	0.0762451	0.127978	0.0435846	0.173308	0.542742	0.121079	0.207124	0.293166	0	0.569796	0.269112	0.0434672	0.0859593	0.0836912	0.318769	0.0961725	0.234896	0.313713	0.0397288	0.119454	0.106224	0.382799	0.328123	0	0.166147	0
ADRBK1		NM_001619	1	67033904	67054029		NP_001610.2	689		chr11		6.35413	0.157396	4.50051	8.78358	6.72193	1.98838	5.81107	7.30163	7.71905	8.59551	7.6424	18.0907	18.9777	3.48362	13.5323	21.4467	18.0194	0.127752	64.1651	8.18997	7.24157	11.7402	6.65557	8.73161	3.32228	3.72481	7.74245	4.00196	4.72216	6.27134	7.55386	6.38124	11.5296	3.56245	3.10924	14.9	14.8128	11.2568
ADRBK2		NM_005160	1	25960860	26125258		NP_005151.2	688		chr22		0.698745	0.377373	0.348626	0.0766129	0.185196	0.340829	0.625637	0.196499	0.464728	0.336999	0.882845	0.806773	0.477345	1.20152	1.04131	0.291958	0.12829	0.0597555	14.4206	2.96309	0.566267	2.38303	0.34739	0.130686	0.635786	0.0277787	0.153282	0.444621	0.674781	1.76622	2.77867	0.885508	1.16043	0.498731	0.239067	0.607852	0.409984	0.201549
ADRM1		NM_001281437	0.18316	60877951	60883918		NP_001268366.1	368		chr20		0.423385	6.20724	9.00622	3.31898	4.2137	3.69304	61.4738	2.45948	0.168521	0	0	0	4.75692	20.297	0	0.825785	6.2627	2.12802	16.6147	52.4604	0.84538	31.3593	21.6371	0.298588	0.288253	0	85.4855	8.1765	2.8136	0.0278285	9.77604	6.21254	0	0	0	0	0.613617	5.93445
ADRM1		NM_001281438	0.161802	60877951	60883918		NP_001268367.1	368		chr20		24.2382	0	3.66685	15.7503	13.4625	0	38.5656	1.89431	14.6522	3.64181	2.80991	1.9178	1.12551	13.0101	5.10738	5.42193	1.8406	0	8.42176	0	0	24.6648	0	3.30346	1.72224	1.50037	23.0327	3.34599	15.1882	23.1405	0.593667	7.92043	15.3131	12.8215	1.73101	2.97364	1.58094	2.91496
ADRM1		NM_175573	0.0899104	60877951	60883918		NP_783163.1	407		chr20		0.181708	0	7.05624	3.04095	3.93697	16.621	19.2092	2.53566	0	4.03349	9.31671	0	8.79284	1.29144	0	8.38225	2.37539	0	0.0450335	3.39727	2.24196	2.87284	0.971529	1.97389	5.54452	5.24723	19.5849	9.72836	8.79288	0	0.271502	0	0	0	0	3.58664	8.05136	0.814364
ADRM1		NM_007002	0.565127	60877951	60883918		NP_008933.2	407		chr20		7.08127	3.18724	3.09859	12.6186	11.1761	12.4734	12.4869	37.5087	13.1635	28.149	32.2731	18.5548	20.9743	7.67707	19.495	45.7026	27.4108	0	71.4993	0	16.7078	2.40327	0	17.421	26.1121	16.821	5.82482	39.7281	40.2375	17.3652	49.5289	67.1708	66.9943	4.81025	24.3522	36.2816	41.7462	43.4545
ADSL		NM_001123378	0.0312861	40742503	40762575		NP_001116850.1	425		chr22		0.493115	2.3647	0	0	1.0094	0.176929	1.28996	0.790125	0.16388	0.373368	1.23208	0	0.685843	1.07571	0.912596	0.198241	0.113639	0.66902	4.44539	1.37546	1.51198	0.747254	0	0.429399	0.319457	0.351761	0.794759	0.168122	0.418435	1.60439	1.24229	2.27131	2.06361	0.259552	0.21794	0.343031	0.642372	0.953293
ADSL		NM_000026	0.968714	40742503	40762575		NP_000017.1	484		chr22		16.9191	48.3147	11.9943	9.50524	16.3136	7.31412	36.5058	14.8695	10.947	13.6554	30.2098	12.6408	17.7897	56.301	15.0327	11.7225	19.96	47.3385	106.293	71.5367	20.8406	32.9565	8.55489	13.2811	15.1728	11.8145	18.1498	15.718	27.1365	28.9135	35.5489	40.8367	38.3255	9.16474	10.4003	26.3536	32.3184	17.2592
ADSS		NM_001126	1	244571793	244615436		NP_001117.2	456		chr1		1.30141	7.64073	1.67639	1.02766	2.90971	2.5885	2.35791	2.33524	1.69963	4.05702	3.09814	2.64503	2.87165	4.33826	1.29669	4.33811	3.12553	5.53909	12.8128	4.23365	3.21787	3.81385	1.27826	1.7163	2.44045	5.32657	1.92683	2.96751	2.95246	0.640208	3.94059	4.37748	2.96619	1.32421	2.34561	3.99829	2.76873	2.59975
ADSSL1		NM_152328	0.837298	105190533	105213647		NP_689541.1	457		chr14		1.44115	0.108829	0.271162	0.289323	1.4311	0.102816	0.622246	0.868716	0.380673	1.08752	0.315499	0.0817346	0.624297	0.745104	0.184309	0.281198	1.16872	0.995932	0.272399	0	0.537766	0.206947	0	0	0.149289	1.07759	0.281993	0.287726	0.229491	1.23313	1.09654	0.688116	0.250166	0.258523	0.578362	1.53126	0	0
ADSSL1		NM_199165	0.162702	105196227	105213647		NP_954634.1	500		chr14		0	0	0.138626	0	0.06125	0	0	0	0.348605	0.120378	0.142954	0	0.0867592	0.0893142	0	0	0.123915	0.0776926	0	0.104319	0	0.0295306	0	0	0	0.521924	0.0908782	0.146175	0	0.0711895	0	0.128004	0	0.248847	0	0	0.108431	0
ADTRP		NM_032744	0.831617	11713887	11779280		NP_116133.1	230		chr6		0	0.0724044	0	0.210787	0	0.180744	0.216661	0.0880512	0.0468498	0.0613892	0.336203	0	0	0.0785986	0	0.0417955	0	0	0.319329	0.068613	0.492855	0	9.63498	2.66281	5.26998	0.0843474	0.0656084	0.0521381	0	0.0427869	0	0	0	0.22252	0	0	0.104821	0
ADTRP		NM_001143948	0.168383	11713887	11779280		NP_001137420.1	248		chr6		0	0	0.129422	0	0	0	0.20943	0.0871674	0	0.0465042	0	0	0	0	0	0	0	0	0	0	0	0.0924127	0	0	0	0	0	0	0	0	0.13806	0	0	0	0	0.0716493	0.217047	0
AEBP1		NM_001129	1	44143959	44154164		NP_001120.3	1158		chr7		0.683864	0.0372578	0.937965	0.412103	0.132923	0.299557	0.144707	0.232932	0.104078	0.253966	0.149042	0.0436981	0.0981033	0.0656974	0.120763	0.115846	0.0587172	0.130027	49.6472	0.325815	0.111909	13.1294	0.692906	0.56359	0.0241798	26.9242	1.95688	6.60852	0.0740367	0.342726	21.6297	1.55969	2.90675	0.761358	0.0962105	0.148504	3.14557	0.970718
AEBP2		NM_153207	0.552076	19592607	19675173		NP_694939.2	503		chr12		0.176359	0.532061	0.340102	0.784315	0.705508	0.283453	0.0773791	0.995248	1.11982	0.674243	0.941215	0.569891	1.76643	0.765597	1.18538	0.96772	1.1189	0.0814429	2.90524	0.324949	0.773068	0.56633	0.346606	0.60654	2.64304	0.903132	0.141049	1.06577	0.590525	0.0713946	1.14058	0.702551	0.868928	0.695375	0.234846	0.800467	1.50982	0.524298
AEBP2		NM_001114176	0.256078	19592607	19675173		NP_001107648.1	517		chr12		1.1538	0	0.31438	0.103935	0.0150328	0.541476	1.07346	0.479398	0	0.660016	0.240389	0.215415	0	0.930131	0	1.02799	0.9266	0.862442	0	0.0858267	0.0612811	1.56603	0.0818343	0.0360588	0	0	0.502932	0.176426	0.179122	0.559143	0.496779	0.616708	0.115115	0.233887	0.854912	0.69176	0	0.379454
AEBP2		NM_001267043	0.191846	19593514	19675173		NP_001253972.1	301		chr12		0	1.8006	0	0	0.680289	0	0.457697	0.0608259	0.100657	0.0239751	0.50925	0.0505863	0.278113	1.58293	0.251445	0.185651	1.04762	5.26932	3.49644	1.63508	0	1.057	0	0	1.29771	0.378119	0.0330022	0.184677	0	0.507394	0.16609	0.262468	0.0794328	0.0431063	0	0	0.533065	0.126623
AEN		NM_022767	1	89164526	89175512		NP_073604.3	325		chr15		6.77243	4.20383	1.70446	4.67914	4.92795	4.00129	11.2896	6.23095	3.64194	2.19974	9.6118	5.21429	11.0266	10.3699	6.65024	8.9375	6.68435	3.15604	14.6981	6.30201	7.18789	9.43143	5.43769	7.1799	13.6275	17.4684	13.1501	12.7739	23.0738	11.1798	30.8726	19.6308	8.88414	3.00271	6.23531	7.17792	11.1969	6.08017
AES		NM_198970	0.0681131	3052907	3062371		NP_945321.1	196		chr19		0	2.69632	0	4.04455	3.1355	0	7.08719	0.7091	5.5793	1.4276	0.670416	0.30597	0.570893	3.09026	0.983275	1.688	2.03487	0	4.18938	0.102992	0.367253	24.1419	26.2018	0	2.30344	0.450335	0	0.405634	1.19716	0.72983	2.20307	2.15003	1.72201	0	1.79726	1.89923	1.56014	0.453697
AES		NM_001130	0.894419	3052907	3062371		NP_001121.2	197		chr19		33.2732	6.21924	40.6285	55.7785	57.2559	37.23	71.2028	49.9348	99.6147	30.5011	42.7584	17.793	36.3088	39.3307	41.4449	32.2779	52.2185	10.3443	203.84	19.2018	35.1174	75.0597	4.43522	27.0941	45.9578	22.3859	73.6793	11.2412	29.2991	52.3919	50.9072	43.9034	52.7569	26.3251	22.8058	88.9969	38.6775	13.0291
AES		NM_198969	0.0374683	3052907	3062964		NP_945320.1	264		chr19		1.79341	0.114572	0.411989	1.64286	1.19809	1.26655	0.0959188	1.35979	3.99515	2.28031	1.89016	1.56129	0.423109	1.63646	0.519303	0.993368	1.61218	0.174162	8.46391	2.05557	0.569455	5.18468	0.922576	1.44616	1.1521	0.209382	1.06479	0.225477	2.16099	6.02631	2.14096	2.11202	1.48391	2.10769	1.44246	8.05352	0.249285	0
AFAP1		NM_198595	0.898269	7760439	7941653		NP_940997.1	730		chr4		1.64693	8.17628	5.83861	4.04236	0.375241	2.99001	5.40449	7.43856	6.93609	2.77657	7.28062	1.34358	2.14559	1.14158	1.42733	1.17665	0.556264	0.578998	0.0703716	0	0.235537	0.606525	0.269084	0.524784	2.33484	1.4382	1.48958	1.56425	0.247882	1.01367	0.283588	2.76759	3.56444	0.915634	1.96734	4.79415	9.37288	3.79784
AFAP1		NM_001134647	0.101731	7760439	7941653		NP_001128119.1	814		chr4		0	0	0.256449	0	0.0918969	0.29973	0.0403313	0.213996	0.0605238	0.0654114	0.332133	0.331518	0.403613	0.00974959	1.11192	0.307371	0.481619	0	0	0.108477	0	0.114088	0.37966	0.172005	0.0402052	0.0334202	0.042738	0	0	0.0895115	0	0	0.228597	0.169866	0.265742	0.0371163	0.878697	1.06737
AFAP1-AS1		NR_026892	1	7755816	7780654		na	na		chr4		0.124192	0.109674	0.27006	0.125717	0.0367924	0.210153	0.165379	0.329159	0.187741	0.156663	0.366727	5.84137	0.135645	0.0880755	26.283	3.59068	5.81397	0.0291949	0.0453627	0.0996013	3.13047	0.0892682	7.78003	12.0515	0.0251495	0.0809452	0.0878574	17.1179	0.0835561	0.0770721	0.0198997	0.0842856	0.16327	0.210838	0.139459	0.130359	20.5327	16.5359
AFAP1L1		NM_001146337	0.549192	148651400	148721367		NP_001139809.1	725		chr5		0.0388838	0.271755	0.656873	0	0	1.24218	2.7224	0.251247	0.105137	0.352162	0.446512	0.0162589	0	0.696822	0	0.0239069	0.0231379	0.043164	0.026951	0.0255997	0.0478768	0.0569841	0.102499	0	0	0.695477	3.69363	1.51147	1.09592	3.31335	2.00763	3.20641	1.79312	1.68132	0.590327	0.458221	1.79003	0.598272
AFAP1L1		NM_152406	0.450808	148651400	148721367		NP_689619.1	768		chr5		0	1.16232	0.480557	0.259477	0.0525834	0.118421	0.343557	2.54257	0.0627692	0.606933	0.137782	0	0.0831362	0.28709	0	0	0	0.0418042	0	0	0	0.0155475	0	0	0.418872	1.37127	0.202476	3.68645	2.02273	0.520279	1.96456	2.98309	4.41162	0.18377	0	1.52022	1.90399	0.463217
AFAP1L2		NM_001001936	0.472558	116054582	116164537		NP_001001936.1	818		chr10		1.33	2.58982	0	0.248819	0	0	0.642257	1.30949	0	1.56863	0.163782	0.756514	0	0	0	0.303807	0	0	0.249339	0	0	0.0789709	1.89116	2.18411	0	1.84173	0	0.643322	0.0655312	0	0	2.68482	0	0	0.958767	0.254106	1.76136	4.29882
AFAP1L2		NM_032550	0.397506	116054582	116164537		NP_115939.1	814		chr10		0.904586	0.458033	0	0	0.0597714	0.157719	0	0.454367	0	0.442879	0.172235	0.398884	0.0965778	0.19206	0.125252	0.14353	0.108154	0.925004	0	0.0651827	0	0.143224	0.754569	0.763224	0	0.799161	0	0.108923	0	0.0659775	0	0.574276	0	0	0	0.465999	0.307516	1.97437
AFAP1L2		NM_001287824	0.129936	116054582	116164537		NP_001274753.1	871		chr10		0	0	0.0519795	0	0	0	0	0	0.0824121	0	0.0381447	0	0	0.0244733	0	0	0	0	0	0	0	0.0373294	0	0	0	0	0.0631337	0	0	0.0230392	0	0	0	0.138677	0	0	0.0449649	0
AFF1		NM_001166693	0.77497	87856153	88062206		NP_001160165.1	1218		chr4		0.981634	3.02687	0.845993	0.855192	1.6414	0.709353	3.48737	2.36422	0.754048	1.76111	3.4752	4.04289	3.29034	3.58137	3.03011	3.5902	2.46242	1.52198	5.71598	4.68041	2.33561	5.68861	1.33453	1.48853	2.04771	2.20816	2.03991	2.87259	2.81552	1.97585	1.59006	1.0791	3.01241	0.910969	2.02125	5.12044	5.27899	2.55068
AFF1		NM_005935	0.22503	87928152	88062191		NP_005926.1	1210		chr4		0.681031	0.579131	0.174062	0.654071	0.585571	0.66263	0.802901	0.537073	0.18192	0.932686	0.484099	0.426028	0.409465	0.95408	0.392632	1.41504	0.654966	0.10141	2.07805	0.210928	1.47107	1.86128	0.100978	1.07251	0.459505	0.712588	1.08849	0.448204	0.715189	0.546072	0.621028	0.331726	0.945662	0.0872203	0.131011	1.34858	0.47674	0.437185
AFF2		NM_001169125	0.6156	147582138	148082193		NP_001162596.1	1272		chrX		0.0279012	0	0.0640737	0	0.00816559	0.010372	0.0068886	0.0124421	0.0370857	0.0121193	0.86832	0.0073895	0	0.00586764	0	0.00534603	0	0	1.35948	0.18971	0	0.543455	0.0310987	0	0	0	0.0270096	0.012337	0.00771293	0	0	0	0.0157394	0.0707354	0.00781774	0	0	0
AFF2		NM_001169122	0.100228	147582138	148082193		NP_001162593.1	1276		chrX		0.013629	0	0.0110057	0	0.00404103	0	0	0.00552634	0	0.00505275	0.191672	0	0	0.00287406	0	0	0	0.0877956	0.0340312	0	0	0.00849092	0	0	0	0	0	0	0	0	0	0	0	0	0	0	0	0
AFF2		NM_001169124	0.065219	147582138	148082193		NP_001162595.1	1276		chrX		0	0	0.0110057	0	0.00404103	0	0	0.00552634	0.69433	0.00505275	0.00878794	0	0	0	0	0	0	0	0.0454795	0	0	0	0	0	0	0	0	0.00582037	0	0	0	0	0	0	0	0	0	0
AFF2		NM_001169123	0.15814	147582138	148082193		NP_001162594.1	1301		chrX		0	0	0	0	0	0	0	0	0.296749	0	0.345097	0	0	0	0	0	0	0	0.451449	0	0	0.0725933	0	0	0	0	0.0126657	0	0	0.0327737	0.0321898	0.0331014	0	0.0683663	0	0	0	0
AFF2		NM_002025	0.00804577	147582138	148082193		NP_002016.2	1311		chrX		0	0	0	0	0	0	0	0	0	0	0.165973	0	0	0	0	0	0	0	0.169094	0	0	0.100462	0	0	0	0	0	0	0	0	0	0	0	0	0	0	0	0
AFF2		NM_001170628	0.0527665	147800614	148082193		NP_001164099.1	952		chrX		0	0	0	0	0	0	0	0	0	0	0	0	0	0	0	0	0	0	0.102608	0	0	0	0.0428439	0	0	0	0	0.0170164	0	0	0	0	0	0	0	0	0	0
AFF3		NM_001025108	0.567055	100163715	100722045		NP_001020279.1	1251		chr2		0.528161	0.0183121	0.770724	1.30998	0.907976	0.251463	0.976672	2.74955	0.461841	0.743541	0.355144	0	0	0.0243912	0	0	0	0.0356544	0.014032	0.0281643	0	0.39239	0	0.018779	0.0626558	0.661911	0.893344	0.306444	0.333075	0.307388	0.961157	0.251747	0	0.231171	0	0.0714241	0.101319	0.0263911
AFF3		NM_002285	0.432945	100163715	100759037		NP_002276.2	1226		chr2		0.406001	0	0.680336	0	3.21485	0.661115	0.668654	0.206442	0	1.03793	0.205005	0.0376214	0	0	0	0.0543497	0	0	2.71146	0.129971	0	1.02116	0.276811	0	0	1.64485	0.278805	0.26045	0.719364	0.243829	0.889991	0.246991	0.487754	0	0	0	0	0
AFF4		NM_014423	1	132211070	132299354		NP_055238.1	1163		chr5		4.60138	7.00043	1.94722	2.81153	4.83383	2.37857	5.81133	12.1357	2.50127	5.32091	8.43981	1.87939	4.65997	3.80396	4.81896	2.56941	3.57622	1.77582	1.91412	0.876006	1.8324	2.69147	0.395104	0.753312	4.13329	3.64061	4.38156	8.34738	6.03314	2.9288	5.00684	5.48066	5.49954	1.40738	1.9784	4.72037	5.92247	5.35269
AFG3L1P		NR_003227	0.794588	90038987	90063028		na	na		chr16		18.7439	6.8115	1.11191	0.899008	4.35524	0.946352	9.21153	2.40827	0.825713	3.22048	4.21192	1.67247	5.46559	13.8349	7.06218	3.49312	1.40942	9.24537	20.0594	2.18132	1.39894	5.36208	0.711729	0.773488	1.12587	3.85915	14.836	4.74437	3.14151	10.8526	4.35322	3.88166	4.65162	0.462986	1.29662	3.29263	10.6956	3.33356
AFG3L1P		NR_003226	0.159209	90038987	90063028		na	na		chr16		2.34615	0.0988225	0	0.545723	1.01548	0	0.731268	0.698465	0.173588	0.583979	0.998447	0.28111	0.80424	1.27656	2.1819	0.867491	0.381522	0	1.15168	0.0756987	0.814488	1.14529	0	0	0.264401	0.645058	1.15121	1.03163	0.781285	0.700908	0.6921	0.447873	0.50083	0.137806	0.717795	0.799548	1.04622	0.798171
AFG3L1P		NR_003228	0.0462027	90038987	90067195		na	na		chr16		0.244035	0	0.0877772	0	0.213876	0.093323	0.147944	0.0478603	0.0860893	0.173538	0.191017	0.105192	0.145324	0.150412	0.195573	0.180062	0.170152	0.12904	0.670645	0.0393355	0.228667	0.177286	0.178291	0.049647	0.117068	0.130162	0.1176	0.098051	0.126858	0.0673491	0.184733	0.0945149	0.0739668	0	0.233746	0.238736	0.147819	0
AFG3L2		NM_006796	1	12328942	12377275		NP_006787.2	797		chr18		9.47796	12.1819	1.8452	3.08915	3.92186	1.90452	3.73012	3.0481	3.64554	3.84568	8.60809	2.17463	9.48651	10.165	7.23388	7.04056	4.18375	5.21721	16.1557	7.86312	8.30106	2.83073	3.61676	4.91577	4.79077	8.31953	5.86754	6.58433	6.15935	10.3425	14.7334	10.3698	9.77796	3.03656	1.97963	7.7499	18.0968	4.64715
AFM		NM_001133	1	74347461	74369718		NP_001124.1	599		chr4		0	0	0	0	0	0	0	0	0	0	0	0	0	0	0	0	0.0403382	0	0	0	0	0.0154843	0	0	0	0	0.0143764	0	0	0.0292193	0	0	0	0	0	0	0	0
AFMID		NR_027083	0.229125	76183397	76193641		na	na		chr17		0.526023	0	0.555094	0	1.04022	1.04416	0.741116	0.332338	0.164571	0	0.626552	1.15764	0.529861	1.73955	0.872994	2.18825	1.04032	0	2.43111	0.638054	0.54515	0.564805	1.21217	1.54161	0.619051	0.183815	0.205106	0.353162	1.00979	1.3047	1.73511	1.6275	2.21583	0.242619	0.361199	0.652389	0.732406	0.467572
AFMID		NM_001010982	0.6301	76183397	76203782		NP_001010982.2	303		chr17		1.10033	1.60685	0.669661	0.704191	2.51571	1.28887	2.02785	0.897404	1.86099	1.02753	1.41885	6.12266	0.494889	5.44089	0.376317	1.71559	4.7044	4.74284	5.5711	4.73052	3.19871	1.82869	5.59335	2.01021	2.22569	1.41573	0.92124	0.866552	0.460418	0.75317	1.83863	1.56686	2.60855	1.86532	2.90959	1.62103	1.84245	0.930854
AFMID		NM_001145526	0.140775	76183397	76203782		NP_001138998.1	308		chr17		0	0	0	0	0.558123	0	0.400098	0	0	0.603012	1.1378	0	0.74237	1.03884	1.862	0.62904	0.88155	0	1.59792	0	1.36713	1.00191	0	2.24059	0	0.148918	0.0396795	0.335353	0.990502	0	1.82271	0.840045	0	0	0	0	0.721937	1.72991
AFP		NM_001134	1	74301935	74321502		NP_001125.1	609		chr4		0	0.0393236	0.142073	0	0	0.223614	0.77971	0.137035	0.0576038	0.211511	0.681269	0	0	0	0	0	0	0	0	0	0.0857057	0.0393824	0	0	0.0410004	0	0.0244606	0	0	0.0159049	0	0	0	0	0	0	0	0
AFTPH		NM_017657	0.642677	64751438	64820138		NP_060127.3	909		chr2		1.79213	3.30323	1.04339	0.954962	2.51444	1.57828	1.91637	1.15363	1.69826	1.4728	1.73648	2.34811	3.27544	2.03374	2.31872	2.78294	2.08585	5.30946	3.7595	4.22445	0.648445	2.05282	1.41025	1.03532	1.13691	1.44601	1.16188	1.05644	1.13988	0.478897	2.22849	1.28656	1.96054	0.601376	1.29047	2.27762	1.01642	0.789028
AFTPH		NM_001002243	0.266421	64751438	64820138		NP_001002243.1	908		chr2		0.850582	3.48232	0.124558	0	0.633575	0	0.524218	0.405587	1.13236	0.327988	0.741641	0.193815	0.925452	0.913841	0.189588	1.1784	1.02387	1.6882	1.85493	1.44899	0.553595	0.584593	0.922989	0.382915	0.357011	0.751762	0.140915	0.444448	0.512182	0.441013	0.550187	0.397418	0.437842	1.66551	0.705428	0.945373	0.493718	0.775581
AFTPH		NM_203437	0.0909018	64751438	64820138		NP_982261.2	936		chr2		0.216714	1.57137	0.163686	0	0.524469	0	0.454959	0.198637	0.0687306	0.0937269	0.249467	0.32378	0.664125	0.489285	0.357145	0.712018	0.84466	1.25321	0.735247	0.200957	0.161103	0.306385	0.0957072	0.162946	0.299849	0.287049	0.160455	0.251131	0.368722	0.0935034	0.141621	0.168277	0.424503	0	0.13024	0.251185	0.143297	0.208836
AGA		NR_033655	0.0832063	178351928	178363657		na	na		chr4		0.277736	0.46582	0.873647	0.851956	0	0	0.0571558	0	1.7704	0	0	0	0	0.23016	0	0	0	0.565869	0.611757	0.379971	0	0.781014	0	0	0	0.181441	0	0.0401604	0	0.0793121	0	0	0	0	0	0	0	0.105891
AGA		NM_001171988	0.0617406	178351928	178363657		NP_001165459.1	336		chr4		0.561945	0.110591	0	0	0.112937	0	0	0	0	0	0.0473342	0	0	0.0533973	0.353721	0	0	0	0.296918	0	0	0	0.0942683	0	0	0.241766	0.046339	0.360641	0.126295	0	0.203751	0.0582229	0	0	0	0	0	0.264615
AGA		NM_000027	0.855053	178351928	178363657		NP_000018.2	346		chr4		0.553293	6.95309	0.459481	0	4.44941	0.792452	1.36009	3.15852	0.824243	2.41429	2.76641	2.01825	2.28607	0.865596	0	0.892092	1.54284	7.43495	7.4801	1.91674	0.869476	1.84065	0	0.243041	0.639955	4.84773	1.17	2.84555	3.31863	2.87266	4.46471	2.64398	1.12846	0.635981	1.00038	2.47014	1.49706	2.07601
AGAP1		NM_001244888	0.244305	236402732	236761846		NP_001231817.1	405		chr2		0.294734	0	0.0810927	0	0.457962	0.898302	0.652693	1.56023	0	1.15499	1.14329	0.724532	0.389172	0.28901	0.945671	0.732708	0.481701	0.0639866	0.0429785	0	0.788874	0.0569833	0.129307	0.401095	0.676273	0.630994	0.995861	1.67289	1.47326	0.531298	0.815902	0.723285	1.09346	0.147392	0.779101	2.96554	1.08194	0.697534
AGAP1		NM_014914	0.345036	236402732	237040444		NP_055729.2	804		chr2		0.162401	1.52733	0.273879	0.995431	1.26375	0.276455	1.00388	1.37545	2.24801	0.675934	2.2723	1.42988	1.66878	1.75279	1.21213	0.59319	0.660389	2.01226	0.0223305	0.0878161	0.597934	0.172192	1.09115	0.515709	0.745231	0.867226	0.576241	1.22438	0.954926	1.00548	0.968022	1.20878	1.27013	0.758781	0.83066	1.48109	0.865299	0.702572
AGAP1		NM_001037131	0.410659	236402732	237040444		NP_001032208.1	857		chr2		2.45956	0.0931822	0.784646	0.239023	1.18351	0.730797	1.50249	1.18539	1.37028	1.93236	1.1828	1.55779	1.25119	1.97996	2.70294	0.742744	2.09005	0.0855809	0	0.0891248	0.814655	0.191082	0.518878	1.27237	0.677613	0.795051	1.3148	1.72649	2.15882	1.77932	1.0989	1.74531	1.88129	0.595445	0.405183	2.12549	1.52057	0.935538
AGAP1-IT1		NR_131900	1	236414394	236416210		na	na		chr2		0.814043	0.129976	0.427368	0	0.65715	0.208569	1.68044	1.01592	0.370594	0.718879	0.782675	1.87121	0.761926	1.42236	1.63484	0.866861	0.583475	0.360033	0	0	0.664009	0.0892578	1.17885	0.690611	0	0.469594	1.0594	0.621298	1.11956	0.463573	0.70822	0.972025	0.851536	0.437815	0.308093	0.957222	0.868422	0.53715
AGAP11		NM_133447	1	88730497	88769960		NP_597704.1	550		chr10		0.576239	0.126926	0.146013	0.251084	0.595765	0.0806692	0.270437	0.122287	0.254685	0.181498	0.176486	0.0888783	0.327926	0.52803	0.290091	0.305483	0.217355	0.134777	0.739286	0.312905	0.331562	0.527549	0.268978	0.0969109	0.0413686	0.332558	0.489898	0.37535	0.123197	1.60253	0.175674	0.10632	0.184863	0.167699	0.196887	0.139469	0.337009	0.450182
AGAP2		NM_001122772	0.507917	58118075	58132029		NP_001116244.1	1192		chr12		0.125856	0.0225678	0.0844336	0.433777	0.0435259	0.0825463	0.12773	0.0480413	0.168344	0.0884438	0.0408777	0.0650689	0.022605	0.0895931	0	0.0904564	0.0731175	0.113257	0	0.0982546	0	0.306306	0.302216	0.0986895	0.0365967	0.0472779	0.23701	0.120082	0.0273926	0.14615	0.0244698	0.0537759	0	0.0349034	0.0632133	0.0875821	0.0257943	0
AGAP2		NM_014770	0.492083	58118075	58135944		NP_055585.1	836		chr12		1.08709	0	0.0801443	0	0.152153	0	0.0342498	0	0.158922	0	0.0976066	0.928489	0	0.971596	0.408181	0.0439362	0	0	4.11136	0.326667	0	1.34102	0.501294	1.61791	0.0613443	0.0253326	0.0314447	0.691312	0.0237637	0.230751	0.0790459	0	0.0887767	0.0966267	0.0421961	0.0821218	0.144681	0
AGAP2-AS1		NR_027032	1	58120022	58122139		na	na		chr12		6.8891	0.0857807	4.84427	13.4017	3.32274	2.21312	11.6933	3.77695	5.54832	2.58308	4.83837	0.646853	2.81835	3.9809	2.97516	1.36407	2.47574	0.370242	0.268825	0.119413	0	0.520996	0.787387	0.272831	11.2372	4.11197	11.6431	4.73044	3.81991	8.93586	6.25117	5.75634	7.42406	3.56447	4.66075	5.90375	3.73105	3.9326
AGAP3		NM_001281300	0.613061	150782917	150841523		NP_001268229.1	580		chr7		11.6715	1.66367	3.5219	6.29891	2.99568	1.49316	13.1047	8.05178	8.34541	7.69369	5.06105	1.86854	7.07269	6.13097	7.21983	10.9469	3.64008	1.21627	6.80922	7.61813	3.1077	4.20868	4.58792	4.43505	2.75881	13.1509	13.0892	8.40743	14.6749	15.4307	15.7519	10.564	12.5102	3.16896	2.44934	4.72637	6.01933	14.0651
AGAP3		NM_001308304	0.0630536	150783508	150820725		NP_001295233.1	343		chr7		0	0	1.92773	1.39229	0.412419	1.61969	3.31451	0.184533	1.98212	0.622961	0.0432331	0.307819	0.191113	0.880715	0	0	0.118688	0	0.165409	0.197042	0	0	3.2586	0	0	0.116474	3.81185	0.239371	0.230471	4.63106	1.1724	0.397883	0.426214	0.726946	0.221936	0.159323	0	0.279647
AGAP3		NM_001042535	0.135815	150783508	150820725		NP_001036000.1	396		chr7		2.39058	0	0.555249	0	0.216544	0	1.74641	2.00193	0.370539	1.55586	1.79983	0.283704	2.92562	0.551805	1.44711	1.42815	0.180376	0	0.18948	0	3.31285	0.464285	0	1.7239	2.08028	6.25998	0.524277	4.01277	5.65304	0.250646	8.61143	6.79402	8.49182	1.3793	0.713941	1.46415	0.92701	1.80379
AGAP3		NM_031946	0.148337	150783508	150841523		NP_114152.3	911		chr7		1.57822	0.122993	0.292186	0.808799	0.334383	1.47745	0.290649	1.87462	1.56472	1.37086	1.39746	0.394686	2.91715	0.540259	2.03502	2.23078	0.544864	0.249689	0.518325	0.164217	4.10261	0.533016	0.180979	1.32999	0.795975	5.73346	0.67197	3.22913	3.07611	1.20619	3.22253	1.79318	3.88995	0.302636	0.309033	2.34508	1.79252	4.90427
AGAP3		NM_001308305	0.0397335	150811764	150820725		NP_001295234.1	576		chr7		0.11404	0.0819556	0.263926	0.19029	0.371545	0.457479	0.160561	0.434216	0.265071	0.390842	0.120043	0.199795	0.112285	0.420812	0.127207	0.530162	0.176282	0.0738018	0.177593	0.272394	0.166239	0.689491	0.447665	0.214985	0.138032	0.189975	0.768776	0.285628	0.157654	0.703941	0.328898	0.251737	0	0.105699	0.278782	0.14026	0.0985269	0
AGAP4		NM_133446	0.268539	46321039	46342921		NP_597703.2	663		chr10		0	0.0626041	0.156205	0.307929	0	0.201636	0.336456	0	0.597686	0	0.046817	0	0	0	0.348546	0.469339	0.120614	0.548605	2.66499	0.521403	0	0.422246	0.540014	0	0.273102	0	0.719291	0	0.141567	0.660167	0.234658	0	0	0.188128	0.412081	0	0	0
AGAP4		NM_001276343	0.529721	46321039	46342921		NP_001263272.2	686		chr10		0.673787	1.36662	0	0	0.864082	0	0.617439	0.481677	0	0.556066	1.10215	0.126849	0.525923	1.19368	0.687272	0.557949	0.493109	0.755946	2.04429	0.751229	0.535082	0.818949	0	0.236096	0	0.475117	0.0497557	0.819432	0.14606	0	0.241864	0.467539	0.47384	0	0.103061	0.757974	0.869081	0.767577
AGAP4		NM_001291379	0.20174	46321039	46349325		NP_001278308.1	578		chr10		0.221654	0	0.0950263	0.106103	0.279272	0	0.184212	0.277521	0.0634543	0.0819868	0.627612	0.123857	0.202533	0.130954	0.213905	0.140112	0.109644	0	0.203439	0.0837206	0.432721	0.154964	0	0	0.0835794	0.0810937	0.100422	0.211366	0.119536	0.12291	0.0935089	0.125541	0.227077	0	0.092269	0.567358	0.285304	0.360767
AGAP5		NM_001144000	1	75434032	75457554		NP_001137472.1	686		chr10		0.983935	1.24365	0.399101	0.407014	1.21569	0.338255	0.880152	0.523732	0.481161	0.741835	0.846163	0.372559	0.575725	1.44019	1.43279	0.988793	0.662946	1.44398	2.28871	0.845242	0.760291	1.40104	0.587322	0.297187	0.209272	0.624837	1.06899	0.566232	0.412413	0.776617	0.437725	0.412986	0.531835	0.244774	0.603299	0.656909	1.34683	0.823843
AGAP6		NM_001077665	1	51748077	51770259		NP_001071133.2	686		chr10		1.83382	2.08113	0.564573	1.30671	2.88175	0.506324	1.35094	1.3728	1.03438	1.81025	2.01384	0.421692	1.51198	2.82126	2.35014	2.11861	1.46713	5.15629	11.5171	1.67141	3.42055	3.86034	1.03019	0.594652	0.703973	1.50231	2.03971	2.37704	0.9952	1.24813	1.28794	1.48352	2.04753	0.486297	1.00488	2.39459	1.86514	1.88126
AGAP7P		NR_126580	1	51464143	51486327		na	na		chr10		1.23058	0.807101	0.262195	0.524583	0.908723	0.169515	0.803702	0.405814	0.415308	0.570866	0.649043	0.145712	0.347429	1.5576	0.985459	0.805229	0.625147	1.39665	4.40192	2.04323	0.444703	2.38868	0.517344	0.152499	0.144848	0.486701	0.954691	0.711376	0.385613	0.536668	0.31729	0.332434	0.650211	0.224407	0.480732	0.598513	0.494585	0.497583
AGAP9		NM_001190810	1	48215723	48237508		NP_001177739.1	658		chr10		1.03577	0.866308	0.396777	0.511543	1.86338	0.114149	1.27456	1.13641	0.534999	0.284125	0.823122	0.321001	0.625823	1.14437	1.47811	1.14677	0.533467	0.973561	2.77067	0.779273	0.379444	1.076	0.511766	0.232853	0.201766	0.600968	0.968645	0.916757	0.41085	0.5211	0.46238	0.548555	0.669193	0.286261	0.660523	1.08055	1.02043	1.17689
AGBL1		NM_152336	1	86685241	87572283		NP_689549.3	1112		chr15		0	0.0288847	0	0	0	0	0	0.0232909	0.0559822	0.0174551	0	0	0	0.0132395	0	0	0	0	0	0	0	0.0430986	0.0579093	0	0	0.0491866	0.0591905	0.011677	0	0.056505	0.0324921	0	0	0.124582	0	0	0	0
AGBL1-AS1		NR_046012	1	86840064	86860199		na	na		chr15		0	0	0	0	0	0	0	0	0	0	0	0	0	0	0	0	0	0	0	0	0	0	0.276127	0	0	0	0.0391219	0	0	0.0427918	0	0	0	0.241252	0	0	0	0
AGBL2		NM_024783	1	47681142	47736928		NP_079059.2	902		chr11		0.308081	0.258238	0.0366118	0.0921038	0.243252	0.0444589	0.0659386	0.0410726	0.0728614	0.0517777	0.134352	0.103894	0.129244	0.0203768	0.0469251	0.199039	0.13046	0.24511	0.20724	0.0521682	0.131607	0.178137	0.164007	0	0.0670831	0.0818621	0.0531652	0.0622703	0.0436963	0.0941163	0.0308421	0.0472684	0.0407203	0.181472	0.214741	0	0.130241	0
AGBL3		NM_178563	1	134671258	134820530		NP_848658.3	920		chr7		0.0361723	0.170988	0.0668071	0	0.0260668	0	0.14086	0.0163497	0.0596772	0.0465896	0.0745548	0.0389534	0.0572043	0.0709448	0.0329339	0.0761698	0	0.120397	0.088578	0.0263339	0	0.0653644	0.12399	0	0	0.0402893	0.280496	0.0501564	0.0444644	0.0343687	0.0256845	0.0473932	0.0345322	0.212034	0	0.0452178	0.0432165	0.0724571
AGBL4		NM_032785	1	48998526	50489626		NP_116174.3	503		chr1		0	0	0.076862	0	0.0306684	0	0.0228208	0.0172898	0.0741306	0.115462	0.0244486	0.0842155	0	0.038064	0	0.0177275	0	0.118359	0.0285942	0.0441846	0	0.0365511	0.190358	0	0	0	0.0880988	0.0489557	0.0330306	0.100931	0	0	0	0.152047	0.0296883	0.0334194	0	0
AGBL4-IT1		NR_046839	1	49839872	49937757		na	na		chr1		0	0	0	0	0	0	0	0	0	0	0	0	0	0	0	0.150379	0	0	0	0	0	0	0	0	0	0	0.162908	0	0	0.109856	0	0	0	0	0	0	0	0
AGBL5		NM_001035507	0.787651	27274490	27282403		NP_001030584.1	717		chr2		3.94862	0.398438	2.82136	1.33585	4.06281	1.98037	5.94099	5.63155	6.70382	3.45148	4.56386	2.93654	1.94661	3.5602	5.26462	6.81095	5.58543	0.167807	19.0644	2.56553	4.28388	5.59806	2.86028	3.09793	8.08089	2.71087	4.14837	4.34051	6.31957	2.77927	5.73897	6.3656	7.1166	1.69946	2.41592	9.87418	7.43279	6.09961
AGBL5		NM_021831	0.146697	27274490	27293490		NP_068603.4	886		chr2		0.676815	0.0488745	0.506336	0.433538	1.25312	0.757141	1.44272	1.12373	0.85564	1.06978	0.812757	0.392737	0.622518	0.721682	1.49151	1.02698	1.00627	0	2.04099	0.162621	0	1.15779	0.587434	0.706701	0.474133	0.603189	0.992479	0.535905	0.769804	0.96691	0.362962	0.906925	0.892332	0.29408	0.610649	0.465721	1.88118	1.41899
AGBL5		NR_104246	0.065652	27274490	27293490		na	na		chr2		0.628108	0	0.169585	0.418972	0.902356	0	0.529456	0.448154	0.72043	0.303481	0.27789	0.896087	0.640017	0.424622	0.420196	0.195474	0.43947	0	4.72332	0.249869	0.617067	0.229898	0.10559	0.158532	0.665584	0.186448	0.0379625	0.172268	0	0.339706	1.05099	0.207359	0.493354	0	0.304759	0.377634	0.561116	0
AGBL5-AS1		NR_046730	1	27272550	27273132		na	na		chr2		0	0	0	0	0.257601	0	0	0.209621	0	0	0	0	0	0.151332	0	0	0	0	0	0	0	0.0950838	0	0	0	0	0.132744	0	0	0.107798	0	0	0	0.423351	0	0	0	0
AGER		NM_001206954	0.00700419	32148744	32152099		NP_001193883.1	325		chr6		0	0	0	0	0	0	0	0	0	0	0	0	0	0	0	0	0	0	0.0572595	0	0	0	0	0	0	0	0	0	0	0	0	0	0	0	0	0	0	0
AGER		NM_001206966	0.0216512	32148744	32152099		NP_001193895.1	347		chr6		0	0	0	0	0	0	0	0	0	0	0	0	0	0	0	0	0	0	0	0	0	0	0	0	0	0	0.0899722	0.0594404	0	0	0	0	0	0	0	0	0	0
AGER		NR_038190	0.379169	32148744	32152099		na	na		chr6		0.452705	0	0.127741	0	0.133938	0	0.0569893	0	0.118134	0.254092	0.162799	0	0.0925333	0.154623	0.277416	0.265606	0	0	0.627455	0	0	0.186017	0	0	0.133189	0.249277	0.236109	0.115574	0.0756735	0	0	0	0	0	0	0.169813	0.210091	0
AGER		NM_172197	0.0317239	32148744	32152099		NP_751947.1	342		chr6		0	0	0	0	0	0	0	0	0	0	0	0	0	0	0	0	0	0	0	0	0	0	0	0	0	0	0	0	0	0	0	0	0	0	0	0	0	0
AGER		NM_001206936	0.011314	32148744	32152099		NP_001193865.1	355		chr6		0	0	0	0	0	0	0	0	0	0	0	0	0	0	0	0	0	0	0	0	0	0	0	0	0	0	0	0	0	0	0	0	0	0	0	0	0	0
AGER		NM_001206934	0.0252096	32148744	32152099		NP_001193863.1	363		chr6		0.150886	0	0	0	0	0	0	0.0639889	0	0	0.109186	0	0	0	0	0	0	0	0.261575	0	0	0.0929855	0	0	0	0	0	0	0	0	0	0	0	0	0	0	0	0
AGER		NM_001206940	0.0884081	32148744	32152099		NP_001193869.1	347		chr6		0.167364	0	0	0	0.238071	0	0.142203	0	0	0.0754121	0	0	0	0.118973	0.240233	0.244382	0	0	2.19633	0	0	0	0	0	0	0	0	0	0	0	0	0	0	0	0	0	0.100157	0
AGER		NM_001206929	0.0620335	32148744	32152099		NP_001193858.1	420		chr6		0	0	0	0	0	0	0	0.156586	0	0.0550672	0.114491	0	0	0	0	0	0	0	0.5878	0	0.363576	0	0	0	0	0	0	0.104868	0	0	0	0	0	0	0	0	0	0
AGER		NM_001206932	0.207286	32148744	32152099		NP_001193861.1	390		chr6		0	0	0	0	0.257953	0	0.272785	0	0	0	0	0	0.155414	0.423704	0.146325	0.159413	0	0	0	0.142036	0	0.208999	0	0.107565	0	0	0	0	0	0	0	0.274534	0.175472	0	0	0	0	0
AGER		NM_001136	0.166201	32148744	32152099		NP_001127.1	404		chr6		0	0	0	0	0	0	0	0	0	0.174892	0	0	0	0.248579	0	0	0	0	4.55681	0	0	0	0	0	0	0.108898	0.0839413	0	0	0	0.180444	0	0.20214	0	0	0	0	0
AGFG1		NM_001135189	0.0148336	228336887	228425938		NP_001128661.1	522		chr2		0	0	0	0	0	0.0218521	0	0	0.0265559	0.0149522	0.015292	0	0	0.0343508	0	0.0397157	0	0	0.0767234	0	0	0	0.435033	0	0	0.0127758	0	0	0.0167578	0	0	0	0	0	0	0.0809786	0.0569726	0
AGFG1		NM_004504	0.837257	228336887	228425938		NP_004495.2	562		chr2		2.13836	4.53699	1.59533	3.18334	1.73468	1.09221	4.53939	3.85588	1.74428	2.6886	2.88389	1.20885	2.88539	4.92037	2.33546	2.07005	2.17902	5.72633	5.66854	2.77484	1.5326	2.33525	0.0981183	0.589242	2.82526	3.54755	2.00897	3.59388	3.90784	2.67952	3.2213	4.04324	2.25703	0.802226	3.48239	5.19114	4.18794	2.04471
AGFG1		NM_001135188	0.143095	228336887	228425938		NP_001128660.1	560		chr2		0	0.837451	0.112919	0.385534	0.288794	0.622065	0.4528	0.623868	0.471233	0.378519	0.911674	0	0.114043	0.543651	0.0868618	0.257705	0.691698	0	1.26695	0	0.27555	0.540068	0.179676	0	0.455846	0.70111	0	0.93321	0.417434	0.12645	0.436147	0.915885	0.51091	0.445595	0.117665	0.730869	1.16517	0.456333
AGFG1		NM_001135187	0.00481405	228336887	228425938		NP_001128659.1	584		chr2		0	0	0	0	0	0	0	0	0	0	0.019218	0	0.0476157	0	0	0	0	0	0.0769574	0	0	0	0	0	0	0.0306759	0	0.0727686	0	0.0295447	0	0	0.0687697	0	0	0	0	0
AGFG2		NM_006076	1	100136833	100165843		NP_006067.3	481		chr7		1.87292	0.179567	0.64495	0.338624	1.15524	0.788218	2.09342	0.74615	0.696806	2.30376	0.967044	4.39399	1.50133	1.0035	1.98549	2.00414	0.878175	0.088325	1.69034	0.133742	0.702548	1.04313	0.754993	0.571552	0.467067	1.84651	1.65041	1.4778	1.00372	1.13267	1.65817	2.13869	2.66659	0.875775	0.80509	2.75177	4.49911	3.52045
AGGF1		NM_018046	1	76326209	76361058		NP_060516.2	714		chr5		2.04027	4.06444	0.699596	1.84867	4.9268	0.726561	3.58887	1.45448	2.65679	2.52077	4.24015	1.51239	1.27714	3.76566	1.30429	1.67432	2.58099	5.46204	7.31255	1.61393	1.40112	3.23081	2.50121	1.14221	2.15934	1.35968	0.916185	1.82367	1.33189	1.22416	2.35008	2.09826	1.24523	1.26156	1.09677	2.25514	1.99233	1.31924
AGK		NM_018238	1	141251077	141354209		NP_060708.1	422		chr7		4.00753	5.96208	1.7762	4.48965	2.28415	2.68464	6.00448	2.26534	3.92782	4.54432	6.76798	0.842882	3.18764	5.76728	1.97121	4.13159	1.50387	10.1584	11.1284	2.63092	5.1873	4.69765	3.22317	2.81915	2.40705	9.14486	4.87431	5.0399	3.82398	3.4241	6.10184	8.66148	8.63794	4.29854	1.75925	3.67101	4.55884	6.25886
AGL		NM_000642	0.7928	100315639	100389579		NP_000633.2	1532		chr1		0.375288	1.10464	0.303052	0.171024	1.69035	0.462922	0.654644	1.32586	0.506689	0.848969	1.64504	0.504016	1.43306	2.88054	0.558338	1.10311	2.14974	0.355088	2.40431	0.502036	1.77182	1.86668	0.0626564	0.119093	0.603393	0.43996	0.552721	0.655415	0.577777	0.174102	1.1371	0.478158	0.721046	0.302549	0.30321	2.01049	0.351331	0.828379
AGL		NM_000643	0.0154886	100316044	100389579		NP_000634.2	1532		chr1		0	0.0987935	0	0	0	0	0	0	0	0	0	0.215379	0	0	0.132888	0	0	0.114167	0.0389859	0	0	0	0	0	0	0.120035	0	0.00977467	0	0	0	0	0	0	0	0	0	0
AGL		NM_000644	0.0677483	100316044	100389579		NP_000635.2	1532		chr1		0	0	0	0	0	0	0.0836659	0	0	0	0.0199603	0	0.329635	0.531961	0	0	0	1.52739	0	0.136995	0	0	0	0	0	0.19238	0.0428208	0.0951182	0	0.0499274	0	0	0	0	0	0	0	0
AGL		NM_000028	0.0317063	100316044	100389579		NP_000019.2	1532		chr1		0	0	0.0619117	0	0.0313029	0	0	0.043789	0.0224967	0.107717	0.202144	0.0371079	0	0.124559	0.0670132	0.0284804	0	0.327333	0.0328924	0.0179617	0.125668	0.0462223	0	0	0	0	0.018015	0	0.0162633	0.024197	0.0173181	0.0439945	0.0444206	0.0503436	0.0392978	0.032132	0	0
AGL		NM_000646	0.0706599	100316530	100389579		NP_000637.2	1516		chr1		0.260049	0.0784051	0	0	0.0257009	0	0	0	0	0	0.0796491	0	0.201593	0.0941096	0.219649	0.100375	0	0.482401	0.0567951	0.494602	0	0.0612399	0	0.0164085	0	0.0655932	0	0.0926544	0.0876158	0	0	0	0.0488138	0	0.0425692	0.113387	0.127702	0
AGL		NM_000645	0.0215969	100326765	100389579		na	na		chr1		0.243451	0.191398	0	0	0	0	0	0	0.0320652	0	0.173315	0	0	0.138181	0	0.0153722	0	0.0867281	0.0453828	0	0	0.00731443	0	0	0	0.0767093	0.183842	0	0	0.0166458	0.0345871	0	0	0.0472796	0	0	0	0
AGMAT		NM_024758	1	15898193	15911605		NP_079034.3	352		chr1		0.571524	0.686093	0.313141	0.287991	0.209448	0.0435442	0.303489	0.0590129	0.0917245	0.458978	0.363863	3.84493	4.3979	0.048152	0.756342	2.199	1.98421	3.20834	0.209903	0.290713	0	0.121084	1.31381	1.73814	0.0235719	0.0981098	0.115476	0.0677488	0.0422503	0.0708986	0.106136	0.0307506	0	0.235297	1.26971	0.252042	0.951669	0.133839
AGMO		NM_001004320	1	15239942	15601640		NP_001004320.1	445		chr7		0	0	0.0547067	0	0	0	0	0.646264	0	0.020358	0	0	0.104934	0	0	0	0.155213	2.164	0	0	0	0	0.138645	0	0.432479	0	0.0209673	0.139122	0.0907991	0.0498021	0	11.8945	0	0.142322	0	0	0	0
AGO1		NM_012199	1	36348809	36389899		NP_036331.1	857		chr1		2.93785	1.27138	2.07612	1.00713	2.45646	2.20502	5.43225	4.29223	3.89791	5.03983	10.3051	2.30258	3.96673	4.29853	6.63415	2.48395	2.00128	2.06072	4.01359	2.53704	6.77969	4.34234	0.98095	1.64045	3.16305	3.48516	9.26872	4.59746	5.75293	3.12593	8.83257	5.65939	7.0989	1.34328	1.5873	4.21786	6.48691	3.75973
AGO2		NM_001164623	0.0514679	141541263	141645646		NP_001158095.1	825		chr8		1.45595	0	0	3.60281	0	0	0.0957437	0	0.695622	0.0751078	0.147927	0	0	0.323435	0.143621	0.454522	0	0	0.139713	0	0.364314	0.134864	0	0.287844	0.559795	0	2.56566	0.126955	0.222634	0.125749	0	0.342436	0.575245	0	0	0.122202	0	0.181799
AGO2		NM_012154	0.948532	141541263	141645646		NP_036286.2	859		chr8		6.98111	2.96099	4.55525	3.61673	7.67264	3.2026	5.17608	12.7951	1.70015	4.96981	5.37485	5.49264	8.04809	8.18006	8.71448	17.6853	8.14413	0.950407	3.73829	3.007	5.34559	4.34375	1.46242	3.1421	5.04787	3.02443	5.58368	8.56858	5.13324	10.0122	7.72188	12.6018	9.04725	1.96312	3.15221	9.85631	13.5412	4.14072
AGO3		NM_177422	0.105921	36396682	36522063		NP_803171.1	626		chr1		0.575484	0	0	0.405517	0	0	0.541484	0.042525	0.530234	0.115835	0.120124	0	0.09908	0.32624	0.057697	0.028448	0	0.107215	0.272528	0.68813	0	0.625545	0.741067	0	0	0	3.49178	0.0470104	0	0	0	0	0.143057	0.431321	0	0	0	0
AGO3		NM_024852	0.894079	36396682	36522063		NP_079128.2	860		chr1		1.47347	3.08019	1.19892	0.426052	1.71064	0.898115	3.3706	4.39264	0.605188	2.64206	5.46153	0.757448	2.3412	5.85183	2.60563	1.54494	1.24779	2.54433	3.47894	1.93538	1.81333	1.83948	0.379899	1.32687	1.35226	0.980669	2.68227	1.76249	1.59053	0.741439	2.9904	3.36122	2.70592	0.136719	0.859154	2.42881	3.01885	2.58087
AGO4		NM_017629	1	36273827	36323490		NP_060099.2	861		chr1		0.369842	0.610261	0.421846	1.16447	0.500091	0.454143	0.502097	0.95231	0.658791	0.898768	0.79168	0.318683	0.528684	0.866198	0.808933	0.84204	0.698537	0.638381	2.52745	1.0744	0.488317	0.95431	0.629809	0.141967	0.534881	0.885217	0.805395	0.596571	0.930211	0.530073	1.30147	0.60519	0.505531	0.431077	0.219521	0.78003	0.709465	1.33642
AGPAT1		NM_006411	0.513519	32135982	32143916		NP_006402.1	283		chr6		1.22274	0	1.78309	2.29858	1.52875	2.91585	3.15874	12.9078	2.80461	8.8171	5.99378	2.89305	6.43265	1.78258	3.08134	1.8088	1.15524	0	2.63293	0.128837	15.3219	0.511401	0.280603	3.36605	6.83856	10.7178	2.15113	7.60819	4.05777	1.91029	18.1679	13.0262	10.3969	1.50547	1.24248	10.1312	10.6225	13.3369
AGPAT1		NM_032741	0.486481	32135982	32145888		NP_116130.2	283		chr6		4.90309	1.23525	3.57573	4.70984	5.9595	0	18.8986	0.60636	1.88101	6.70082	1.99979	1.3205	2.53451	4.224	5.80958	1.66421	2.61858	0.0923167	4.30593	1.32508	0	1.30103	1.19337	1.54393	5.27153	10.4464	10.7036	6.0366	7.55071	4.40949	2.83331	0	15.0691	2.12563	1.22421	5.2988	11.242	6.56297
AGPAT2		NM_001012727	0.278908	139567594	139581911		NP_001012745.1	246		chr9		0	0.359388	6.01296	10.5718	2.75315	0	8.19833	1.79819	17.9443	1.76192	1.61394	2.93587	4.93132	0.971164	0	2.81461	1.39153	0.297645	1.22353	6.335	1.05772	0.833545	18.3205	2.31769	0.707043	0.316573	1.35139	0.446649	1.2094	5.21622	3.04585	2.14641	1.9785	7.42274	3.90171	0.953845	1.15016	0.76015
AGPAT2		NM_006412	0.721092	139567594	139581911		NP_006403.2	278		chr9		5.24541	0.112812	3.79137	5.63575	6.30783	4.5615	9.34808	9.25296	5.67032	13.9016	7.84545	22.9323	17.7962	8.81842	4.06266	18.0582	16.7539	0	26.6821	2.77293	6.04949	0.831482	0.342982	8.28899	11.1961	7.26886	13.627	6.68361	10.5588	4.2752	20.9908	13.1481	15.6802	2.83954	6.89781	9.72975	6.68106	10.4416
AGPAT3		NM_020132	0.224795	45285115	45407475		NP_064517.1	376		chr21		0.876427	0.114697	0.66358	0.937382	0.416028	0.69694	1.75508	1.86393	0.528819	2.73295	0.863752	0.821819	2.29347	0.703582	0.750545	0.726427	0.784472	0	0.348933	0.10414	2.17282	0.301931	0	2.0383	0.132032	0.81746	1.20154	2.81179	0.649011	1.5285	1.87738	0.368619	1.64671	0	0.797375	1.46082	2.23005	2.33708
AGPAT3		NM_001037553	0.775205	45345278	45407475		NP_001032642.1	376		chr21		5.39525	3.79427	3.0946	5.48203	4.65415	1.81895	15.0455	4.03424	7.40535	8.52273	5.15777	1.79982	5.7012	3.08941	5.82017	3.69215	2.84034	1.37825	3.7843	4.0551	2.2963	0.0527116	4.0548	2.79984	0.394608	3.73765	4.12753	1.43301	2.74578	3.29979	3.57154	4.68297	7.95853	3.55237	2.09833	3.90631	5.99568	2.38119
AGPAT4		NM_020133	1	161551056	161695107		NP_064518.1	378		chr6		0.0254677	0.276674	0.430126	1.20619	0.0749594	0.114765	1.14164	0.792069	1.18716	0.798044	0.955909	0.0168859	0.0366075	0.444916	0.29376	0.0709103	0.269857	0.036942	0.520507	0.0873703	0.339937	0.448028	0.252866	0.0342673	1.31421	0.0703333	0.152902	0.13044	0.0908339	0.208232	0.219445	0.268857	0.100614	0.136106	0.152507	0.474166	0.68367	1.12256
AGPAT4-IT1		NR_024277	1	161581163	161583014		na	na		chr6		0	0.142845	0.338109	0.763171	0	0	1.40338	0.692474	0.493077	0.784513	0.517947	0	0	0.45323	0.286357	0	0.0722069	0.0556923	0.623548	0.103808	0.438624	0.559608	0.416447	0.117193	0.355427	0.0777353	0.0846856	0.112147	0.12425	0.156093	0.56942	0.255368	0	0.192881	0.18418	0.172679	1.17468	0.724137
AGPAT5		NM_018361	1	6565877	6619021		NP_060831.2	364		chr8		2.45178	6.78708	2.64426	5.84753	1.46541	1.68536	6.26195	4.88678	3.80943	2.9911	8.28022	2.43713	2.19281	12.7468	3.92024	2.04668	4.66397	6.89234	12.3064	5.16477	2.9001	4.32791	2.04689	1.1621	5.96308	2.09894	1.61692	2.39006	1.91642	1.81377	2.5121	5.13395	3.23359	1.50548	1.97552	1.81441	3.13546	1.3915
AGPS		NM_003659	1	178257470	178408564		NP_003650.1	658		chr2		0.0197515	5.26401	1.11012	0.610848	0.00882491	0.819375	4.50746	3.06724	2.84837	2.01553	10.1119	2.05452	1.74536	4.26141	2.02686	2.02674	1.55179	5.22896	9.11404	2.504	2.56269	2.47908	1.00514	0.906831	2.84801	2.73614	0.701957	1.74785	2.45853	1.0126	4.32531	2.90107	1.71031	0.946102	1.48228	3.11062	2.85589	2.19677
AGR2		NM_006408	1	16832263	16844738		NP_006399.1	175		chr7		1.29923	0.119644	0	0	575.02	0	0.115811	0	13.2614	0	9.31806	120.012	19.7121	0	0.734218	19.3242	964.643	4.43665	0	0	0	0.0370485	0	0	0	0	0	0	0	0	0	0	0	0.615474	7.14238	35.219	0.554922	0
AGR3		NM_176813	1	16899029	16921613		NP_789783.1	166		chr7		0	0	0	0	37.7406	0	0	0	0	0	0	1.44214	0	0	0	0	10.5642	0	0	0	0	0	0	0	0	0	0	0	0	0.0298898	0	0	0	0	0	0	0	0
AGRN		NM_198576	0.960752	955502	991499		NP_940978.2	2045		chr1		6.78947	0	10.9371	21.3251	18.9507	4.38297	11.5981	26.3416	25.2087	17.7041	17.0338	1.7999	11.2005	2.62181	13.56	39.8604	3.9999	0.153548	1.11169	0.0968493	3.42804	0.489789	1.08017	2.81756	6.87294	5.53372	8.92078	6.10453	7.5773	3.07021	12.6107	11.6011	12.7017	4.1154	6.73542	20.6757	32.294	24.3004
AGRN		NM_001305275	0.0392485	955502	991499		NP_001292204.1	2068		chr1		0	0.128283	0.0722696	0	0.226797	0	0.0303192	0.0942788	0	0.0449223	0.0466639	0.0357796	0	0	0.0698262	0.106044	0.0488358	0	0	0.438153	0	0	0.250614	0.046813	0.0670237	0.0533134	0.160553	0.0228327	0	0.24244	0	0.0220193	0	0	0.0718904	0.182239	0.0613198	0.0572301
AGRP		NM_001138	1	67516473	67517716		NP_001129.1	132		chr16		0	0	0	0	0	0	0	0	0.274216	0.109505	0	0	0	0.0483116	0.185721	0	0	0	0.147918	0.21679	0	0.0986253	0.546587	0	0	0	0.140286	0.102147	0	0.0599153	0	0	0	0	0	0	0	0
AGT		NM_000029	1	230838271	230850336		NP_000020.1	485		chr1		0	0	0.278345	0.272415	0.0380606	0.0557965	0.203883	2.56135	0.646917	0.592789	0.0840396	4.04029	0	0.0320157	0	0.0460398	0	0.160411	0	0.0425782	0	0.105375	0.320493	0.0291338	0	0.225737	0.0769401	1.38587	0	0.106895	0.112448	0.0811136	0	0.202656	0.0558348	8.28648	0	6.52172
AGTPBP1		NM_001286717	0.157719	88161453	88356944		NP_001273646.1	1238		chr9		0.69389	0	0	0.551802	0	0	0.172967	0	0	0	0.312823	0.08622	0	0	0	0	0.528785	0	2.02812	0	0	0	0.635776	0.0912003	0	0	0.812584	0.0746491	0.328794	0.706405	0	0	0	0	0	0	0	0
AGTPBP1		NM_001286715	0.379743	88161453	88356944		NP_001273644.1	1278		chr9		0.206182	2.76832	0.564198	0.617677	0.123294	0	0.135148	0.335274	0.968716	1.23488	0.243567	0	0.826941	0.792673	1.06817	0.0941091	0.804622	0	1.0631	1.0685	0.0966273	0.983417	0.270091	0.254732	0.0841087	0.489754	0.264181	0.485063	0.570607	0.234311	0.502059	0.274462	0.341814	0.311358	0.0873521	0.34337	0.788485	1.02141
AGTPBP1		NM_015239	0.462539	88161453	88356944		NP_056054.2	1186		chr9		0	5.10108	0.167791	0	0.314282	0.4167	0.327358	0.43315	0.317597	0.829761	0.219432	0	0.205028	1.23977	0.344475	0.227474	1.02019	0.466778	1.84151	2.26072	0.243466	0.292515	0	0	0.542317	0.227541	0	0.462175	0.219614	0	0.495841	0.281171	1.17798	0.275085	0.445544	0.502731	0.13508	0.673347
AGTR1		NM_009585	0.512345	148415657	148460790		NP_033611.1	359		chr3		0	0	3.16563	0.77378	0	1.73385	0	0.386894	0	0	0	0.0399192	0	0	0	0	0	0	0	0	0	0.0535961	0.123544	0.0440974	0.334642	0	0	0	0	0	0	0	0	0.203155	0	0	0	0
AGTR1		NM_000685	0.230692	148415657	148460790		NP_000676.1	359		chr3		0.0495032	0	0.254571	0	0	0	0	0.0795188	0	0.121873	0	0	0	0.0136648	0	0	0	0	0	0.0248843	0	0	0	0	0	0	0.129496	0	0	0.0183895	0	0	0	0	0	0	0	0
AGTR1		NM_004835	0.0666667	148415657	148460790		NP_004826.5	394		chr3		0	0	0	0	0.0283689	0	0	0	0	0	0.0754611	0	0	0	0	0	0	0	0	0	0	0	0	0	0	0	0	0	0	0	0	0	0	0	0	0	0	0
AGTR1		NM_031850	0.0286765	148415657	148460790		NP_114038.4	394		chr3		0	0	0	0	0	0	0	0.0955649	0	0	0	0	0	0	0	0	0	0	0	0	0	0	0	0	0	0	0	0	0	0.059815	0	0	0	0	0	0	0	0
AGTR1		NM_032049	0.16162	148447966	148460790		NP_114438.2	388		chr3		0	0	3.40752	0	0	0	0	0.439308	0	0.0923532	0	0	0	0	0	0	0	0	0	0	0	0	0.113894	0	0	0	0	0	0	0	0	0	0	0	0.0677512	0	0.0918254	0
AGTR2		NM_000686	1	115301957	115306225		NP_000677.2	363		chrX		0	0	0	0	0	0	0.0197939	0	0	0	0	0	0	0	0	0	0	0.0317405	0	0	0	0.0174596	0.14078	0	0	0	0.0280163	0	0	0.0103711	0	0	0	0.130315	0	0.0504408	0	0.0356755
AGTRAP		NM_001040195	0.201332	11796141	11810828		NP_001035285.1	111		chr1		0	1.30172	3.25945	11.0656	5.87879	1.50745	8.79738	2.61066	0.74298	1.0102	0	1.34991	0.234936	12.5305	2.05142	1.46297	2.61588	0.253226	3.93554	23.3255	0	3.12779	10.0757	4.63555	0	1.97572	2.57916	1.09067e-12	2.07004	0.349033	0	0	0	3.17381	4.87648	0	0.285159	2.02633
AGTRAP		NM_001040194	0.0530817	11796141	11810828		NP_001035284.1	152		chr1		0	0	0	0	0	0	0	1.58661	0	0.620169	1.41695	0	3.57582	0	0.174029	0	0	0	0.161748	0.963568	5.96987	0.633805	0	0	1.36479	0	0	1.15088	0	0	5.25523	3.42315	2.07403	0	0.209442	2.0456	2.03767	3.98782
AGTRAP		NM_020350	0.68914	11796141	11810828		NP_065083.3	159		chr1		15.5594	0	4.69571	29.7098	15.744	3.11192	39.0863	14.8787	8.59668	16.0827	8.81551	7.97461	10.8957	20.1556	8.63473	15.829	13.0323	0	15.7998	1.3374	11.7278	1.0361	5.16458	13.7294	11.7517	11.3218	22.0995	16.5608	29.7197	27.8348	26.0255	25.3214	17.4288	8.23864	9.05266	18.1078	18.4655	17.6065
AGTRAP		NM_001040196	0.0142381	11796141	11810828		NP_001035286.1	155		chr1		0	0	0	0	0	0	0	0	0	0.590782	0.172432	0	0	0.372487	0	0	0	0	0	0	0	0	0	0	2.42177	0	0	0.874497	0	0	0	3.56445	1.14911	0	0	1.34025	0.306771	0
AGTRAP		NM_001040197	0.0422083	11796141	11810828		NP_001035287.1	147		chr1		0.601252	0	0.609655	1.53509	1.06455	0	1.27109	1.80185	0.152516	0.806938	1.0314	0.698686	1.80521	0.362082	1.26113	0.226551	1.016	0	1.19631	0	2.22765	0.0633309	0	0.753049	0	1.03056	1.43327	0.388151	0.834947	0.866075	1.68638	0	0	0.283057	0	0	2.79473	1.66854
AGXT		NM_000030	1	241808161	241818536		NP_000021.1	392		chr2		0	0	0.0953929	0	0.0748884	0.0736221	0.0876075	0	0.108894	0.0543907	0.0457543	0.148881	0	0.0387721	0	0.0540011	0.0718308	0.0531602	0.045634	0.0747404	0	0.214833	0.244426	0	0	0	0.153178	0	0	0.181786	0	0.0865209	0	0	0	0	0	0
AGXT2		NM_001306173	0.531674	34998205	35048240		NP_001293102.1	439		chr5		0.110283	0	0	0	1.03935	0	0	0	0.057377	0	0	0	0	0.0834883	0	0	0	0	0	0	0	0	0	0	0	0	0	0	0	0.0158867	0	0	0	0	0	0	0	0
AGXT2		NM_031900	0.468326	34998205	35048240		NP_114106.1	514		chr5		0	0	0.0537964	0	0.185696	0	0	0	0	0	0	0	0	0	0	0	0	0	0	0	0	0	0.107122	0	0	0	0.0130977	0	0	0	0	0	0	0.0767276	0	0	0	0
AHCTF1		NM_015446	1	247002401	247094726		NP_056261.4	2275		chr1		1.78634	10.4716	1.08675	2.3563	2.45062	1.25807	2.5595	3.11102	1.38066	3.01062	4.274	1.08064	2.01433	5.31855	3.32618	2.67692	2.53694	6.28201	6.26468	2.22275	3.81968	2.15095	0.817671	1.43472	2.54275	4.04143	0.871077	2.58409	2.03142	1.32907	3.219	4.18584	2.26307	0.872081	1.37391	5.41309	3.14297	3.52837
AHCTF1P1		NR_077058	1	162355577	162364413		na	na		chr2		0.750069	1.26401	0.423323	0.931899	0.429651	0.407989	0.602875	0.512794	0.507419	0.665611	0.648912	0.31582	0.555588	1.18337	1.0032	0.683844	0.544596	0.627822	0.567266	0.638723	0.622638	0.84975	0.355831	0.401779	0.507078	0.762987	0.781448	0.762137	0.707791	0.410369	0.527878	0.706424	0.55318	0.469416	0.523055	0.67864	0.760505	0.690029
AHCY		NM_000687	0.997745	32868070	32891215		NP_000678.1	432		chr20		51.2123	11.0371	18.0711	39.6191	54.9974	21.5218	36.8253	38.6184	25.0375	35.9062	49.2187	73.7685	52.051	76.7489	44.1259	63.5427	90.6286	12.4413	126.09	22.8484	38.8197	38.3242	26.0204	30.1361	51.0496	34.4799	73.5562	88.4196	59.3901	99.0426	83.5428	139.627	120.273	37.173	40.261	49.4636	73.4481	76.5994
AHCY		NM_001161766	0.00225516	32868070	32899608		NP_001155238.1	404		chr20		0	0.0634812	0.191156	0	0.033541	0.0950312	0.0595202	0.0428122	0.43817	0.136172	0.122294	0	0	0.0326407	0	0.101023	0.125067	0.1052	0	0.128456	0	0.0538351	0.588882	0	0	0.161491	0.194055	0	0	0.216348	0	0	0	0.326904	0	0	0	0.104693
AHCYL1		NM_006621	0.277634	110527386	110566364		NP_006612.2	530		chr1		1.62199	0.668838	2.42142	2.32756	2.80557	4.46806	3.14043	6.33967	3.0859	6.02904	6.12935	1.42669	6.50188	1.51577	6.0418	3.00367	4.47853	0.642954	1.16328	1.28158	6.48425	2.41721	0.442444	0.926538	3.03569	2.61365	2.41395	8.99692	5.53439	4.1318	5.98258	5.01832	2.65927	1.1024	3.13445	5.7246	3.92601	3.52344
AHCYL1		NM_001242673	0.0345218	110527386	110566364		NP_001229602.1	483		chr1		0.508184	0	0.940316	0.808093	0.202414	0.472669	0	0.317767	1.05269	0.54908	0.321759	0.203284	0.341926	0.242154	0.437935	0.703785	0.963555	0.306352	0.0453877	0.121361	0.115213	0.84936	0.436521	0.153892	0.3031	0.0450442	0.252827	0.609745	0.792976	0.303749	0.182782	0.0977371	0.104055	0.140635	0.692053	0.391818	0.327308	0.145907
AHCYL1		NM_001242674	0.666381	110543548	110566364		NP_001229603.1	483		chr1		12.0963	36.1132	8.18203	5.88191	14.2342	0.651913	37.8605	14.5787	12.2523	15.6405	28.2757	5.80487	12.3109	28.432	12.3954	8.15891	13.1439	11.5262	29.6145	13.6379	3.09443	9.21207	4.80182	2.37761	5.81446	7.00167	14.3942	17.0792	15.2652	19.7081	26.4115	15.4517	6.76404	3.85095	3.96444	8.81914	10.9411	11.4544
AHCYL1		NM_001242676	0.00556594	110546569	110566364		NP_001229605.1	483		chr1		0.135504	0.0848232	0	0.202474	0.0457553	0	0.12417	0	0.360458	0	0	0.221486	0	0.0534041	0.0473123	0	0.0825391	0.0732359	0.174922	0	0.215129	0.0914094	0.17748	0	0	0.157835	0.0681026	0.159576	0.210139	0.0260702	0.0365473	0.0937114	0.0425878	0	0.120875	0	0	0
AHCYL1		NM_001242675	0.0158967	110546569	110566364		NP_001229604.1	483		chr1		0	0	0.50775	0	0	0	0	0.448651	0	0.267275	1.00911	0	1.62073	0	0	0.319119	0	0	0	0	0	0	0	0	0.0869218	0	0	0	0	0	0	0	0	0	0	0.696302	0.215242	0.387572
AHCYL2		NM_015328	0.175804	128864854	129070052		NP_056143.1	611		chr7		0	0.0802028	0.105708	0.183891	0	0.107202	0.226733	0	0.0925096	0.289029	0.211181	0	0.339864	0	0.519149	0.0631125	0	0.105738	0	0.0800719	0.140999	0	0	0	0.0961344	0.307942	0	0.480731	0.148598	0.859609	1.29115	0	0	0.173736	0.0915694	0.508283	0.166147	0.449885
AHCYL2		NM_001130720	0.448484	128864854	129070052		NP_001124192.1	610		chr7		0.83167	0.102234	0.111314	0.190967	0.442368	0.340774	0	0.5853	1.93631	0.768875	0.439288	0.2645	0.87372	0.969796	0.270858	0.420928	0.920666	0.238751	0.902719	0.404377	0.163063	1.34525	0.642491	0.366313	0.118794	0.32201	1.354	0.902944	0.610198	0	0	0.305897	1.86648	0.47986	0.451912	0.913453	0.173415	0.921365
AHCYL2		NM_001130723	0.127651	129007963	129070052		NP_001124195.1	508		chr7		0.295378	0	0.0864928	0.107478	0.117217	0	0.0756621	0.0426008	0.0934787	0.243597	0	0.282917	1.33443	0.105273	0.336484	0.242752	0.0889777	0.224279	0.0315785	0.0280078	0	0.129562	0.309544	0	0	0.302193	0.113369	0.143409	0.859	0.0206238	0.179501	0.0999488	0.462025	0.447301	0	0.10023	0.0840055	0.117948
AHCYL2		NM_001130722	0.248061	129015483	129070052		NP_001124194.2	508		chr7		0	0.614415	0.0341296	0.182969	0.303487	0	1.95608	0	0.690003	0.0760096	0.761581	0	0	0.600173	0	0	0	0	2.03509	0.0234977	0.196011	0.0181169	0.473792	0.0844293	0.342303	4.508	0.501865	0.459542	0.310413	0.570916	0	1.06746	0.269045	0.424697	0	0.963939	0.48564	0.868969
AHDC1		NM_001029882	1	27860755	27930005		NP_001025053.1	1603		chr1		1.50622	0.344336	3.50456	4.54065	1.66216	1.01549	3.22738	10.6516	5.42452	11.7071	3.73252	1.50036	3.01369	2.65443	3.96477	2.72126	2.60335	0.259743	2.05652	0.947331	2.96616	2.3477	0.564034	0.689418	2.18988	3.02365	4.51389	5.59475	4.31979	0.723322	5.42149	5.025	4.68187	1.23315	1.09891	2.63224	5.18715	8.81496
AHI1		NM_001134830	0.341988	135605109	135818903		NP_001128302.1	1196		chr6		0.275705	0.262842	0.222338	1.38735	0.260572	0.247225	0.92077	0.535589	0.334758	0.657554	0.315978	0.891607	0.255495	0.937012	0.301396	0.343727	0.499911	3.56244	0.420177	1.25573	0.778155	4.68825	0.392624	0.0847205	0.0972057	0.71718	0.451257	0.27669	0.123977	0.118561	0.382461	0.213376	0.157298	0.388658	0.454265	1.10055	0.265121	0.743674
AHI1		NM_017651	0.0533702	135605109	135818903		NP_060121.3	1196		chr6		0	0	0	0	0	0	0.373841	0.102357	0	0	0	0	0	0.972842	0	0	0.377528	0	0.317023	0.134342	0	0.961708	0	0	0	0	0.0170522	0	0	0	0	0	0	0	0	0	0.109795	0
AHI1		NM_001134831	0.182042	135605109	135818903		NP_001128303.1	1196		chr6		0.0594446	1.6794	0.22806	0	0.239068	0	0.434294	0.617287	0.392097	0.702168	0.517801	0.649265	0.36749	0.372184	0.178658	0.0460009	0.276764	1.42744	0.485134	0.233825	0.549744	0.285529	0.0834591	0	0.43869	0.694576	0.038364	0.0540555	0.126265	0.0209334	0.121542	0.323435	0.0377393	0	0.150036	0.911057	0.49664	0.130959
AHI1		NM_001134832	0.4226	135708921	135818903		NP_001128304.1	1053		chr6		0.33467	2.52105	0.287207	0	0.869772	0.260496	0.755921	0.550931	0.0841379	0.951417	0.750545	1.254	0.997631	1.07077	0.7901	0.498732	0.188928	7.70822	0.0791219	0.869469	0.963535	0.0541018	0	0.318118	0.244434	0.632883	0.706024	0.391764	0.372259	0.245733	0.613808	0.705174	0.721288	0.149842	0.499955	1.67852	0.59484	0.391238
AHNAK		NM_024060	0.253875	62201013	62314332		NP_076965.2	149		chr11		1.18167	0.78655	7.16291	1.52521	7.64882	7.52387	6.60995	3.10122	3.41506	10.2295	1.30487	4.20145	7.16853	4.04586	1.75515	13.6858	10.425	0.115551	3.13028	2.48926	0.73979	0.349588	8.1972	6.98496	2.95447	0.847354	4.41957	2.24351	3.37785	1.42976	1.85037	1.25401	3.4475	2.03099	10.539	6.4986	6.52329	2.01915
AHNAK		NM_001620	0.746125	62283373	62314332		NP_001611.1	5890		chr11		9.44284	17.5357	15.2623	2.88384	35.0842	16.8147	6.97727	11.6116	2.33283	22.1878	11.7502	4.82118	13.379	11.9117	26.551	17.7162	5.10992	1.05299	0.141929	1.99577	2.51387	0.224401	5.35447	14.1711	16.5905	8.61241	19.2264	7.09743	21.4935	1.15937	1.55394	11.0626	9.05932	3.53821	11.3028	21.4365	31.4483	31.344
AHNAK2		NM_138420	1	105403590	105444694		NP_612429.2	5795		chr14		0.733753	0.133813	1.36023	6.25736	1.08795	0.556504	2.17235	3.34135	0.837262	0.979858	6.03884	0.105911	2.24536	2.07985	0.156524	0.197247	0.570556	0.0628505	0.0307009	0.0964712	0.053856	0.109224	0.313155	0.0862918	1.98147	8.23616	0.214616	5.27029	0.443611	3.42431	0.497107	1.13179	0.641715	1.21739	7.68395	21.4186	0.233112	5.45962
AHR		NM_001621	1	17338275	17385775		NP_001612.1	848		chr7		1.16348	7.89759	5.47593	5.86688	3.02855	0.478457	10.4392	2.10193	0.12857	5.94106	0.127734	1.69465	5.89517	3.73932	1.76194	3.85257	19.296	2.71247	0	1.91537	0.0292462	0.0681464	0.700979	0.0366972	1.32986	2.46539	6.30938	5.19209	2.11555	2.15453	3.44795	11.0886	8.43508	3.98534	1.56948	16.2042	7.44808	12.1341
AHRR		NM_001242412	0.978176	304290	438405		NP_001229341.1	701		chr5		0.25267	0.0379994	3.00019	3.2491	0.26974	1.44497	4.42504	4.84116	0.272534	4.7175	0.0826822	0.316733	0.817632	1.13251	0.64966	0.132697	0.114066	2.95609	0.486161	2.02105	0.112463	0.29814	0.505734	0.196586	0.402913	4.53409	5.68324	0.939892	1.04348	4.44743	0.586034	3.15958	4.08959	0.994747	0.179961	1.18593	2.50387	6.2417
AHRR		NM_020731	0.0218236	304290	438405		NP_065782.2	719		chr5		0	0	0	0	0.0345209	0	0	0	0	0.0854336	0	0	0	0.0190999	0	0	0	0	0.0369846	0	0	0	0	0	0.0960764	0	0.0320582	0.0177695	0	0.0672479	0	0.0673741	0	0	0	0	0	0.0666881
AHSA1		NM_012111	1	77924372	77935815		NP_036243.1	338		chr14		39.0975	8.85452	11.4476	20.1246	27.3587	7.15001	38.6566	27.5352	9.826	20.8444	34.8301	14.6507	41.7513	53.8894	22.3127	18.5453	41.3855	2.05395	91.0543	17.0125	14.252	35.4216	11.3598	21.5826	23.0456	23.1267	18.4072	45.275	15.3841	21.7158	23.8945	53.942	50.1992	14.2097	24.3821	22.3359	36.676	17.7948
AHSA2		NM_152392	1	61404554	61414686		NP_689605.1	137		chr2		2.67012	2.29952	0.561202	0.721884	2.83566	0.526746	1.31884	0.949294	1.13196	2.31202	1.57773	0.417213	2.36827	2.70341	3.42338	3.30793	1.33262	16.2944	16.1116	1.75595	1.23315	3.54678	1.66066	1.10144	0.95471	1.96541	3.04261	1.45577	2.22823	1.47896	4.13734	1.78252	2.46497	1.0151	2.3323	4.19213	1.82779	2.13254
AHSG		NM_001622	1	186330849	186339107		NP_001613.2	367		chr3		0	0	0.0970484	0	0	0.0836126	0	0	0.0817289	0.0282789	0.0362611	0	0	0.151943	0	0	0	0.0557098	0.0836105	0	0	0.130224	0.366266	0	0	0	0.044202	0	0	0.0240448	0	0	0	0.185705	0.0926816	0.0711804	0	0
AHSP		NM_016633	1	31539202	31540124		NP_057717.1	102		chr16		0	0	0	0	0	0	0	0	0	0	0	0	0	0	0	0	0	0	0	0	4.79954	0.0885671	0	0	0	0	0	0	0	0	0	0	0	0	0	0	0	0
AICDA		NM_020661	1	8754761	8765442		NP_065712.1	198		chr12		0	0.0237715	0.0886395	0	0	0	0	0	0.0645163	0.0168154	0	0	0	0.0151697	0	0.0264043	0	0	0.0402501	0	0	0.0281575	0.146355	0	0	0	0.0363409	0	0	0.1014	0.0431574	0	0.037291	0.181338	0	0	0	0
AIDA		NM_022831	1	222841354	222885864		NP_073742.2	306		chr1		1.61965	28.1172	5.92174	5.08656	3.37345	3.24723	9.64821	6.07477	4.81101	10.43	8.54712	2.43621	4.73812	10.52	5.19032	3.37518	5.36779	18.7786	9.61337	5.32048	4.21189	2.70177	3.21857	2.48237	9.66866	8.84175	5.16099	5.10491	4.88855	3.41517	6.46519	8.86369	5.30411	2.39309	2.6497	7.16882	9.39623	16.9957
AIF1		NM_004847	0.139023	31582993	31584798		na	na		chr6		0	0	0	0	0	0	0	0	0	0	0	0	0	0	0	0	0	0	1.74364	3.2564	0	5.67383	0	0	0	0	0	0	0	0	0	0	0	0	0	0	0	0
AIF1		NM_001623	0.00974079	31583032	31584798		NP_001614.3	147		chr6		0	0	0	0	0	0	0	0	0	0	0	0	0	0	0	0	0	0	1.35177	6.49627	0	0.217096	0	0	0	0	0	0	0	0	0	0	0	0	0	0	0	0
AIF1		NM_032955	0.851236	31583788	31584798		NP_116573.1	93		chr6		0	0	0	0	0	0	0.41041	0	0	0.110557	0	0	0	0	0	0	0	0	232.897	83.6893	0.684338	75.2268	0	0	0	0	0	0	0	0	0	0	0	0	0	0	0	0
AIF1L		NR_033701	0.105605	133971862	133998539		na	na		chr9		1.17444	0	0	0	0.183007	0	0	0.135176	0	0.751083	0	0.0969437	0	0.27193	0	0.228841	0	0	0	0.0441863	0.0861779	0	0.787064	0	0	0.319518	0.171192	0	0	0.581821	0	0	0.529918	1.08243	0	0	0.068699	0
AIF1L		NM_001185096	0.125498	133971862	133998539		NP_001172025.1	102		chr9		0.42939	0	0.189589	0.0570311	0.125312	0	0.23856	0	26.9535	0	0	0	0	0.0673777	0	0.173464	0	1.52957	0	0	0	0	0	0	0	0	0.575939	0	0	1.90921	0	0.0722172	0	0	0	0	0	0
AIF1L		NM_031426	0.756252	133971862	133998539		NP_113614.1	150		chr9		18.8107	0.107036	0	0	5.03326	0.309359	0	0	34.491	15.0586	7.42299	0.544703	2.30255	5.89814	5.28506	0.19212	1.42079	0	0.797899	0	0.844001	1.45675	1.6714	3.38923	0	4.16318	0	2.09648	0.111926	0.726371	1.09086	2.96206	9.34875	2.03044	0.397605	0.210703	0.907611	0.0418739
AIF1L		NM_001185095	0.012645	133971862	133998539		NP_001172024.1	176		chr9		0	0	0	0	0	0	0	0	0	0.120804	0	0	0.168074	0.0455274	0.195609	0	0	0	0	0	0	0	0	0	0	0	0.0602703	0.0355349	0	0.0633513	0	0	0	0	0	0	0	0
AIFM1		NM_001130846	0.044597	129263337	129272015		NP_001124318.2	274		chrX		0.483341	0.0648322	0.381286	2.54892	0.142825	0.283612	0.344166	0.281816	1.33989	0.302457	0.676067	0	0.405902	0.316133	0.284006	0.358763	0.30671	0	0.464884	0	0.128186	0.175674	1.67013	0.172126	0.0810175	0.283864	1.14109	0.396908	0.308553	0.25804	0.25818	0.279502	0.562244	1.36941	0.1819	0.281391	0.458852	0.287981
AIFM1		NM_145813	0.477089	129263337	129299861		na	na		chrX		9.75829	14.1412	1.02841	7.20389	8.54973	0.878556	15.4316	1.72548	3.0293	3.58236	7.55803	5.7491	2.30539	8.85377	1.15341	5.32643	7.70339	74.8174	22.7356	24.8681	0.717917	9.59286	6.46397	3.53853	2.11083	3.30508	7.30917	1.61175	5.10865	8.16164	5.7156	10.92	4.94496	2.7166	3.85514	2.64802	3.42018	2.54541
AIFM1		NM_145812	0.00208887	129263337	129299861		NP_665811.1	609		chrX		0	0	0	0	0.0379426	0	0	0	0	0.0370507	0	0	0	0	0	0	0	0	0	0	0	0	0	0	0	0	0.123588	0	0	0	0.0869825	0.103166	0.259137	0	0	0	0	0
AIFM1		NM_004208	0.475981	129263337	129299861		NP_004199.1	613		chrX		6.24058	2.01695	1.06809	4.77442	2.50455	1.85143	1.61248	4.02844	2.87294	3.17938	10.5762	4.84068	6.84612	4.44225	5.11163	3.62717	4.8971	2.06328	10.7302	2.83499	8.54037	2.15852	0.502574	4.04215	3.81913	5.97956	1.40491	6.95199	5.04219	3.86475	4.93961	9.81439	8.21419	1.71053	4.43271	10.9941	5.67863	4.18684
AIFM1		NM_001130847	0.000244875	129263337	129299861		NP_001124319.1	324		chrX		0	0	0	0	0	0	0	0	0	0	0.0675674	0	0	0	0	0	0	0	0.0363037	0	0	0	0	0	0	0	0	0	0	0	0	0	0	0	0	0	0	0
AIFM2		NM_032797	0.658629	71872022	71892690		NP_116186.1	373		chr10		1.36493	2.62946	0	0	0.155306	0.629498	2.46117	0.909356	1.89117	1.57108	5.37445	0.36942	4.32174	2.23444	3.18138	2.13562	1.56911	1.0408	0	0.185215	0.877615	0.0302404	1.27445	1.02761	0	1.7455	5.58083	3.28939	3.20869	6.52065	2.45666	1.11	7.21313	2.98137	5.29218	2.82404	6.02959	4.40958
AIFM2		NM_001198696	0.341371	71872022	71892690		NP_001185625.1	373		chr10		1.23485	0.0360362	1.9972	2.686	0.0314216	0.0559832	0	1.29777	1.88925	0	4.50702	3.06964	4.75351	2.07028	1.33757	2.86065	1.57116	0.0495345	0.774388	0.0556013	1.63961	0.528949	0.122973	0.0511129	0	1.74412	3.17831	0.821153	0	3.47006	1.96943	2.58577	0	0	0	2.30521	2.6473	0.807058
AIFM3		NM_001018060	0.562938	21319417	21335649		NP_001018070.1	598		chr22		0	0	0.0843078	0	0.0911718	0.0381473	0	0	0.0736704	0.10319	0.0756765	2.2809	0.277561	0.172223	0.169121	0.223894	0	0.0861543	0	0	0	0.138814	0.115846	0.146303	0	0.357529	0.0551	0	0.148536	0.146924	0.226408	0	0	0	0.291138	0.281381	0.0457297	0.208609
AIFM3		NM_144704	0.00942158	21319417	21335649		NP_653305.1	605		chr22		0	0	0	0	0	0	0	0	0	0	0	0	0	0	0	0	0	0	0	0	0	0	0	0	0	0	0.0549555	0	0	0	0	0	0	0	0	0	0	0
AIFM3		NR_027464	0.360602	21321446	21335649		na	na		chr22		0	0	0	0	1.75623	0	0.0598465	0.0442161	0	0	0	0.853831	0	0.049841	0	0.071093	0.0509951	0	0.035465	0.132499	0	0.0488981	0	0	0	0	0	0	0	0.101798	0	0.0836611	0.0431676	0.107233	0.0899552	0	0	0
AIFM3		NM_001146288	0.0670378	21321446	21335649		NP_001139760.1	604		chr22		0.138621	0	0.0904316	0	0	0	0	0	0	0	0	0	0	0	0	0	0	0	0	0	0	0	0	0	0	0	0	0	0	0	0	0	0	0	0	0	0	0
AIG1		NM_001286587	0.36935	143380499	143661480		NP_001273516.1	228		chr6		2.17141	3.40943	0.308584	0	2.7859	0	0	6.46232	2.37814	3.38729	1.54987	1.59825	0.693275	6.33526	4.19213	1.76427	2.87479	10.9767	2.70235	3.8405	3.47303	0.625072	0.37008	0.720376	2.68816	0.167025	0	0	0	0.402146	0	0	0	0	0.270463	0.315879	0.983563	5.98882
AIG1		NM_001286588	0.0246709	143381978	143511739		NP_001273517.1	134		chr6		0.102991	0.178891	0.0725505	0	0.069019	0.12392	0	0.0847258	0	0.177381	0.167415	0	0.0589718	0.247239	0.201384	0.0310911	0	0.303289	0.035345	0.0506779	1.40023	0.0242735	0.0892875	0	0	0	0.0773872	0.0521724	0	0.0204051	0	0.0504142	0	0	0	0	0.185242	0.129367
AIG1		NM_001286589	0.147839	143381978	143511739		NP_001273518.1	137		chr6		0.120344	1.38634	0.724556	0.262659	0.341642	0.0821014	0.549915	1.00974	0.582793	0.677817	0.415408	0.208509	0.503082	1.10477	0.491367	0.616415	0.983102	0.117005	0.470269	0.308884	1.88604	0.205785	0.265562	0.100424	0.246639	0.076783	0.0531361	0.134837	0.104788	0.318753	0.252384	0.305806	0.0361579	0.175261	0.109832	0.153888	0.59099	0.309943
AIG1		NM_016108	0.45814	143381978	143661480		NP_057192.2	238		chr6		0.881111	0	2.53383	1.55147	2.71296	3.17356	4.24497	3.39145	6.96001	4.20597	2.78008	0.431217	2.20801	0.464425	0.157964	1.19128	6.54012	0	7.94271	0	0	1.16505	1.31638	1.19347	1.13841	0	0.255953	1.2621	0.265913	0	0.505843	1.5294	0	0	1.58074	4.59647	3.26028	1.34311
AIM1		NM_001624	1	106959729	107018324		NP_001615.2	1723		chr6		1.226	1.6361	0.109081	0.649683	3.68646	0.0995389	5.59653	2.61582	1.23818	1.94227	10.3341	1.90302	1.01409	0.986553	2.34689	5.44384	3.2285	0.218438	7.97026	5.48882	0.020686	2.50647	0.138383	0.0202442	0.99412	0.211059	1.57183	2.13212	1.06262	0.0427725	0.0200181	2.17767	1.50927	0.753072	0.0733367	0.832489	2.16239	2.05967
AIM1L		NM_001039775	1	26648349	26680621		NP_001034864.2	1661		chr1		0.198021	0.0371265	0.150684	0.0562987	1.13088	0.0389513	0.147427	0.0399047	0.140347	0.0774883	0.140911	1.0641	4.59148	0.494725	4.02261	1.11088	0.58629	0.109818	0.150301	0.251331	0.102731	0.212201	0.572474	0.121719	0.109821	0.0918423	0.186226	0.0736752	0.0592536	0.211733	0.154662	0	0.0186257	0.0771477	0.420266	0.109364	0.953175	0.253722
AIM2		NM_004833	1	159032274	159046647		NP_004824.1	343		chr1		0	2.37614	0	0	0	0	0.36454	0.254361	0	0.0345818	0	0	0	0	0	0.0443095	0	0.112679	0	0	0	0.041471	0.940265	0.469495	2.7659	0.293581	0.0502086	0.256695	0.493865	0.0347811	0	0	0	0.163513	0	0	1.6706	3.61451
AIMP1		NM_001142415	0.501095	107236766	107270381		NP_001135887.1	312		chr4		4.24307	0.205339	2.35211	3.85001	0	1.70567	5.48688	3.42023	2.33048	3.13647	4.19983	1.817	5.97434	9.14216	1.68491	2.25664	1.63247	0	11.2107	13.253	0	1.94513	5.41026	1.99344	2.25192	2.28566	3.57197	2.40165	2.19138	2.05314	0	4.95076	2.63041	1.72823	2.40573	0.888278	4.01461	1.87436
AIMP1		NM_004757	0.0532555	107236852	107270381		NP_004748.2	312		chr4		1.03375	0.198645	0.60265	0.134169	0.490021	0	0.161664	0.0716425	0.121976	0.228038	0.2264	0.324669	0.333118	0.148103	0.243976	0.537904	0.305183	0.064669	0.241812	0	0.203503	0.960549	0.241491	0.268236	0.089542	0.170404	0.184541	0.246772	0.342179	0.141448	0.300728	0.109027	0.148596	0.212144	0.974493	0.139446	0.197833	0.218589
AIMP1		NM_001142416	0.445649	107237663	107270381		NP_001135888.1	336		chr4		2.4369	27.5743	0.287051	0	8.31932	2.47923	6.04521	1.71067	0.642019	1.81488	4.76536	3.89675	1.73772	3.94941	1.23057	5.56864	6.94692	23.5779	16.8843	6.22062	7.28054	6.0131	0.531605	0.949011	2.52216	1.27129	0.355206	0.866892	0.917136	0.402551	6.18352	3.34816	1.3818	0.381786	0.684041	4.31831	1.079	0.979759
AIMP2		NM_006303	1	6048881	6063465		NP_006294.2	320		chr7		37.0766	37.6462	10.052	18.5562	16.2763	6.95276	37.731	17.7789	15.9672	12.7016	40.3794	9.18752	27.2269	25.5034	6.2997	12.1161	10.2823	39.5673	48.3393	24.9661	10.9774	7.93343	15.4264	9.94848	10.3028	5.07725	16.7744	10.5584	9.31924	23.9975	27.6618	43.3661	9.49671	3.85416	9.43396	16.846	13.4056	10.1307
AIP		NM_001302960	0.0453175	67250499	67258579		NP_001289889.1	283		chr11		0.52483	0	0	1.9948	0.3557	0	0.45277	0.193817	0	0.219219	0.246465	0.342341	0	0.187613	2.45144	0	0	0.760513	2.16136	4.71671	0	0.583457	0	0	0.189797	0.113303	0.0488656	0.404808	0.199029	0	0	0.415755	1.07651	0	0	0.468943	0.252503	0.294964
AIP		NM_003977	0.847133	67250499	67258579		NP_003968.3	330		chr11		22.1942	1.25379	13.3291	14.3393	18.8229	7.30957	27.2772	13.2618	14.1241	21.6959	9.19568	11.86	7.65723	10.9408	4.67006	22.7756	20.3681	0	130.584	0	8.02957	19.6857	3.82978	15.8596	10.8847	6.34214	40.4902	13.5526	14.6958	13.8609	0	18.6596	36.2306	14.4817	8.05403	27.5495	15.5956	22.1012
AIP		NM_001302959	0.107549	67250986	67258579		NP_001289888.1	271		chr11		0.25404	2.23926	1.19864	0	4.52127	0.312623	0	0	0	0.32424	0	0	0	0.826965	1.0461	0.219895	0	0	7.91097	8.86056	0	15.0698	11.0544	0	0.287432	0.260555	7.84284	0	0.355414	0.194637	0	0.292399	0.832739	2.3213	0.227065	0	0.445256	0.236876
AIPL1		NM_001285402	0.109642	6327056	6338452		NP_001272331.1	345		chr17		0	0	0	0	0	0	0	0	0	0.0204732	0	0	0	0	0	0	0	0	0	0	0	0.0905457	0.171955	0	0	0	0.0667003	0	0	0	0	0	0	0.131699	0	0	0	0
AIPL1		NM_001033055	0.189647	6327056	6338519		NP_001028227.1	324		chr17		0	0	0.0763925	0	0	0	0	0.0189605	0	0	0.0464434	0	0	0	0	0	0	0.0459394	0	0	0	0	0.10306	0	0	0	0	0	0	0	0	0	0	0	0	0	0	0
AIPL1		NM_001033054	0.202583	6327056	6338519		NP_001028226.1	321		chr17		0	0	0	0	0	0	0.0338058	0	0	0	0	0.0559527	0	0	0	0	0	0	0	0.0285078	0	0	0	0	0	0	0	0	0	0	0	0	0	0	0	0	0	0
AIPL1		NM_001285401	0.146125	6327056	6338519		NP_001272330.1	360		chr17		0	0	0	0	0.0183253	0	0	0	0.08711	0	0	0	0	0.0171433	0	0	0	0	0	0	0	0.0192878	0	0	0	0	0	0	0	0.039402	0	0	0	0	0	0	0	0
AIPL1		NM_001285400	0.00808909	6327056	6338519		NP_001272329.1	362		chr17		0	0	0	0	0	0	0	0	0	0	0	0	0	0	0	0	0	0	0	0	0	0	0	0	0	0	0	0	0	0	0	0	0	0	0	0	0	0
AIPL1		NM_001285399	0.0508153	6327056	6338519		NP_001272328.1	372		chr17		0	0	0	0	0	0	0	0	0	0	0	0	0	0	0	0.0244417	0	0	0	0	0	0	0	0	0	0	0	0	0	0	0	0	0	0	0	0	0	0
AIPL1		NM_001285403	0.293098	6329371	6338519		NP_001272332.1	262		chr17		0	0	0.106116	0	0	0	0	0	0	0	0	0	0	0.0464172	0	0	0	0.0601049	0	0.063235	0	0.136331	0.186497	0	0	0	0.0268606	0	0	0.0623181	0	0	0	0.128053	0	0	0	0
AIRE		NM_000383	1	45705720	45718102		NP_000374.1	545		chr21		0	0	0.0782403	0	0.0801762	0.0624922	0	0.0529129	0	0.0644979	0.0515456	0.0429258	0	0.0847954	0	0.039696	0.0527244	0.195608	0.0386627	0.0320495	0	0.168067	0.269933	0	0	0.0453618	0.212894	0.055692	0.0473326	0.129556	0	0	0	0.104141	0.0404851	0	0	0
AIRN		NR_047514	0.987899	160424322	160428696		na	na		chr6		0.034242	0.0460214	0.0875513	0.0523319	0.0436007	0.0277297	0.0269699	0.0539683	0.111787	0.0745021	0.101906	0.0537958	0.0543219	0.038949	0.0762563	0.0523279	0.0365376	0.0804578	0.0382009	0.0875348	0.0621848	0.141675	0.351528	0.100076	0.031096	0.102084	0.138837	0.10125	0.107595	0.0908254	0.0968565	0.093928	0.138034	0.161762	0.0456731	0.0345496	0.0563088	0.0979876
AIRN		NR_047511	0.0121008	160424322	160428696		na	na		chr6		0	0	0	0	0	0.0692101	0	0	0	0	0	0	0	0	0	0	0	0	0	0	0	0	0	0	0	0	0	0	0	0	0	0	0	0	0	0	0	0
AJAP1		NM_001042478	0.525472	4715104	4837854		NP_001035943.1	411		chr1		0	0	0	0	0.0421291	0	0.812358	0.0423609	0	0.672185	0.0479094	0.130556	0	0.0299829	0	0.0403888	0.065392	0.0679699	0.0555214	0.0940304	0	0.220698	0.3066	0.0828093	3.03768	0	0.132297	0.0426277	0.0452857	0.138403	0	0	0	0	0	0.270644	0	0
AJAP1		NM_018836	0.474528	4715104	4843851		NP_061324.1	411		chr1		0	0.0686756	0.0601067	0	0	0.0910415	1.59188	0	0.092421	1.85451	0.0626655	0	0	0.0200508	0	0	0	0	0.14621	0	0	0.166109	0.217794	0	12.515	0	0.130499	0	0.0347806	0.0546392	0	0	0	0.0799143	0.0466808	0.642379	0	0
AJUBA		NM_198086	0.589167	23440382	23446432		NP_932352.1	121		chr14		0.700856	7.69563	3.80856	5.19589	4.03407	0	3.57701	1.7087	2.46028	0.943269	7.44395	0.356376	1.32519	2.27045	7.73106	1.71138	2.63173	2.45687	1.10473	0.120177	0.223693	0.193794	0.1228	0.0902841	0.939448	0.696854	0.379386	2.60407	0.322563	0.647583	0.63483	2.05449	0.470674	0.415378	2.6567	3.82274	9.38121	16.1516
AJUBA		NM_032876	0.357507	23440382	23451851		NP_116265.1	538		chr14		0.270534	0.125077	1.72525	4.6354	0.874039	3.02735	0.822744	3.30002	1.18567	0.734154	3.2215	0.425227	1.5865	1.01834	4.26627	0.780798	1.12067	0.095288	0.0900408	0.0489293	0.167038	0.31559	0	0.0639009	0.763601	0.410563	0.32088	2.34134	0.211515	0.158478	0.464381	0.608808	0.507658	0.172372	2.1023	3.78126	4.20544	13.605
AJUBA		NM_001289097	0.0533259	23447820	23451851		NP_001276026.1	369		chr14		0	1.4437	0.247798	0.446707	0.249989	0.328768	0.0698331	0.111896	0.148387	0.0920081	0.420042	0	0.0934009	0.0775753	0.386479	0.16612	0.169531	0.119062	0.139777	0.0559688	0	0.100237	0	0	0	0	0	0.174507	0.0820139	0.0293422	0	0.0537685	0.0835049	0	0.157862	0.251193	0.303377	0.815868
AK1		NM_000476	1	130628758	130640022		NP_000467.1	194		chr9		6.78223	1.2339	3.509	3.39465	10.6711	3.22267	9.47132	9.04185	4.61843	16.8085	5.5981	7.87112	3.78704	10.0032	5.80747	4.0599	4.59925	0.308469	1.14107	0.751263	3.36464	0.51222	1.52979	1.18592	5.79111	4.85467	5.94326	3.40153	3.79322	5.57091	5.31793	6.74878	8.04956	3.47782	2.34558	6.06125	6.78798	12.2976
AK2		NM_013411	0.701193	33473540	33502512		NP_037543.1	232		chr1		6.39929	9.388	7.55849	18.5257	8.77921	5.07549	16.3912	9.73533	9.97499	9.54004	20.3912	10.1729	16.7525	23.2095	12.6469	16.7138	17.137	30.9191	39.75	40.6053	22.3659	12.7916	17.4104	12.0641	13.5604	5.92483	19.1234	9.83389	18.2441	6.92311	25.2598	17.7587	15.6403	7.44608	5.31194	6.50887	10.3335	6.59755
AK2		NM_001199199	0.000256095	33473540	33502512		NP_001186128.1	224		chr1		0	0	0	0	0	0	0	0	0	0	0	0	0	0	0	0	0	0	0	0	0.292653	0	0	0	0	0	0.0228792	0	0	0	0	0	0	0	0	0	0	0
AK2		NR_037591	0.0279027	33473540	33502512		NP_001306068.1	184		chr1		0	0.508372	0.329751	0.628665	0.475625	0.356955	0.249107	0.406356	0.210826	0.64149	1.14549	0.309579	0.530711	0.591509	0.278252	0.711377	0.709538	0	1.91302	0.198745	0.713286	0	0.421994	0.348543	0.316761	0.320731	0.543995	0.306177	0.757336	0.0546343	1.59316	1.44714	0.465036	0	0.228419	0.307257	1.06998	0.350199
AK2		NM_001625	0.26547	33476825	33502512		NP_001616.1	239		chr1		4.11152	12.3929	4.11986	3.6387	6.20822	3.707	4.50109	4.19431	1.80653	6.00297	4.12292	8.30319	4.39892	3.20643	4.71188	5.78095	5.80672	13.3106	5.94201	11.2254	6.38797	3.36501	2.90547	4.03662	4.17787	2.09171	3.72399	2.44919	4.6319	2.68825	10.1526	10.742	3.72143	1.51471	2.64355	3.87469	5.36857	5.08904
AK2		NR_037592	0.00517814	33476825	33502512		NP_001306069.1	191		chr1		0	0.233021	0	0	0.122876	0.0967532	0	0.0556211	0	0.158604	0.0791878	0.073523	0	0.0216083	0	0.084315	0.0778664	0	0.0398883	0	0	0	0	0	0	0	0.0501689	0	0.0633104	0	0.123453	0.222631	0	0	0	0.0610808	0.256519	0.0969304
AK3		NM_001199856	0.0855721	4709556	4726227		NP_001186785.1	157		chr9		0.201273	0.412451	0.102687	0.277128	0.22008	0	0.276792	0.279511	0.387179	0.565947	1.3451	0.100434	1.28594	0.673356	0.186324	0.374612	0.493778	0.833699	1.8938	0.167503	0	0.395711	0.444728	0	0.146779	0	0.190686	0	0.0881701	0	0.386123	0.397556	0.336691	0	0	0.179572	0.206271	0.196204
AK3		NM_001199852	0.0289619	4709556	4741309		NP_001186781.1	187		chr9		0	0.0809905	0	0	0.104078	0.0456286	0.0711928	0.0825017	1.23852	0.102481	0.162642	0	0.128098	0.240413	0.060462	0.0443733	0.0929749	0.0708118	0.0695046	0.876385	0	0.0303717	0	0	0	0.0930129	0	0.0196148	0.128673	0	0	0.144762	0.0447126	0.381299	0	0.0530217	0.18163	0
AK3		NM_016282	0.737462	4709556	4741309		NP_057366.2	227		chr9		3.35864	0.896542	1.07496	4.42409	1.84906	1.59777	2.23207	2.60612	5.65632	3.92167	5.63317	1.85245	2.80461	4.77798	4.06102	4.56815	5.30418	0	0.678654	0.499806	2.54447	1.28396	0	0.98523	3.2561	2.68185	1.35031	0.945521	1.30088	1.23567	3.81592	3.4051	2.29654	1.40476	2.37994	5.05745	4.90371	2.53349
AK3		NM_001199855	0.0389925	4709556	4741799		NP_001186784.1	157		chr9		0	0	0	0	0.904136	0	0	0.0334091	0	0.490442	0.0687628	0	0.219734	0.401749	0	0	0	8.70825	0	0	0	0	0	0	0.198396	1.14886	0.0397994	0	0	0.147536	0	0	0.0457459	0	0	0	0	0
AK3		NM_001199853	0.109012	4709556	4742043		NP_001186782.1	157		chr9		0	2.86761	0	0	0	0	2.58644	0	0.0818855	0.0398551	0.0842597	0	0	0	0	0.0959393	0.0588157	0	1.4442	4.21725	0	0.653779	0.753356	0	0	0.0649771	0	0.22254	0	0.0477747	0.0551809	0	0	0.956906	0	0	0.266844	0
AK4		NM_203464	0.153865	65613231	65697828		NP_982289.1	223		chr1		0	0.429127	0	0	0.730214	0.47276	0	0.704531	1.55622	1.05011	0.370164	0	0	1.14467	1.22404	0.150567	0	0	0.0447552	0	0	0.0347582	0	0.0535681	0.0679875	0.0225926	0.520581	0.314122	1.29085	0.111931	0.930185	0.675287	0	0.264466	0.138841	0.0331486	0.230555	0.488643
AK4		NM_001005353	0.133657	65613512	65697828		NP_001005353.1	223		chr1		0.202607	0	0.107587	0.760223	0.0617797	0.466264	0.0783174	0.0632308	0.50771	0.275987	0.235204	0.0364398	0.115513	0.0705635	0.113959	0.425129	0.107018	0.163579	0	0.0763878	0.149024	0.21912	0.159998	0.050161	0.071081	0.0792963	0.872178	0.0432149	0.576217	0.277567	0.294692	0.187078	0.245965	0.135569	0.0942831	0	0	0
AK4		NM_013410	0.712478	65613849	65697828		NP_037542.1	223		chr1		2.41986	4.10984	2.78881	2.24385	2.86758	1.33045	0	2.67836	1.6697	7.77938	6.71402	0.0822581	0.277952	3.74726	1.36446	1.83751	3.31917	2.95157	0	2.12751	1.85988	0.105808	0.112523	0.107717	0.770819	0.243195	1.00228	0.283681	4.3377	0.787958	1.59876	5.12253	3.20705	0.839789	0.890564	0.142784	2.09991	5.19791
AK5		NM_174858	0.86458	77747661	78025654		NP_777283.1	562		chr1		0.0481454	0.294954	1.06214	0.185544	0	0.370058	0.7742	0.336343	0.318142	4.08453	0.809937	0.0291324	0.0639405	0.0505725	0.0585092	0	0	0.11714	0	0.0799212	0.0572375	0.0696257	0	0.0304937	8.26551	0.0233387	8.10698	0.62154	1.31886	0.0455912	0.433098	0.242017	0.523113	0.175806	0.165544	0.12564	0.452191	0.0450369
AK5		NM_012093	0.13542	77748286	78025654		NP_036225.2	536		chr1		0	0	0.154192	0	0.0163799	0.0364332	0	0.0202864	0.0348977	0.153089	0.0558192	0	0	0.0123319	0	0.0185164	0	0.0489223	0.027175	0.069671	0	0.0507308	0.147601	0	0	0	0.0936394	0	0	0.0231985	0	0	0.0386144	0.138825	0	0	0	0
AK6		NM_016283	0.907217	68647552	68665409		NP_057367.1	172		chr5		6.13317	83.0534	1.74319	4.26927	10.1252	2.75324	18.2877	5.05201	3.27286	6.42744	8.68324	8.56434	7.10424	16.3454	3.99711	5.09779	8.14671	147.306	39.9324	10.8223	14.7871	8.61731	2.55895	5.244	6.20622	3.07496	3.10775	3.05296	4.00763	2.25085	8.44865	8.3215	5.96914	2.94644	3.13062	5.87411	3.93583	5.13015
AK6		NM_001015891	0.0927835	68647552	68665840		NP_001015891.1	169		chr5		0.505805	1.54584	0.677457	4.39672	0.131386	0	1.45627	1.19853	0	0.969537	1.32069	1.14065	0	1.50569	0.520225	0	1.43458	0.915455	1.27552	0.955766	0.447818	0.118107	0.988084	0	0.30349	0.152891	0	0	0	0	0.663208	0.701176	0.523802	0	0.892	0.174095	0.356452	0.698046
AK7		NM_152327	1	96858447	96955764		NP_689540.2	723		chr14		4.09171	0.0190832	0	0.0935067	0.240674	0.0365507	0.020516	0.0160995	0	0.0227864	0	0.12687	0.063643	0.316136	0.0864346	0.0307614	1.06432	0.208466	0.0958186	0.0453463	0	0.0449796	0.0742513	0	0	0.0353316	0.0640621	0.0239013	0.0290671	0.368907	0.0288994	0.088877	0	0.157874	0.154754	0.0509054	0.171531	0.133543
AK8		NM_152572	1	135600964	135754198		NP_689785.1	479		chr9		0.387298	0.0891669	0.110264	0.300714	0.715984	0.166327	0.202624	0.0808665	0.16826	0.270492	0.132031	0.127261	0	0.558178	0.201947	0.170469	0.163277	0.0933744	0.371474	0.210189	0	0.438647	0.477647	0.056729	0.100879	0.0684507	0.370664	0.067952	0.128506	0.298015	0.0580771	0.121819	0.123242	0.141435	0.149999	0.0555693	0.187754	0
AK9		NM_001145128	0.0781124	109814058	110012415		NP_001138600.2	1911		chr6		0.0222756	0.11474	0.0250922	0	0.0195315	0	0.0181135	0	0.0316871	0.0148927	0.0129112	0.0179458	0	0.0621552	0	0	0.0363242	0.0777558	0.166888	0.088054	0	0.0691221	0.0267307	0.0356328	0	0.0233227	0.0354109	0	0	0.0423621	0	0	0	0.0317171	0	0	0	0
AK9		NM_145025	0.921888	109952899	110012415		NP_659462.1	421		chr6		0.500407	0.487168	0.0872636	0.132114	0.813191	0.217846	0.303355	0.235517	0.62263	0.461785	0.302627	0.424638	0.249795	0.339595	0.299342	0.268766	0.373964	1.60525	1.14631	0.224132	0.10052	0.310498	0.311022	0.0957159	0.0571751	0.214923	0.0936722	0.117141	0.324477	0.0818207	0.174983	0.0526515	0.123273	0.110842	0.0959003	0.27047	0.287972	0.15295
AKAP1		NM_003488	0.887422	55162552	55198710		NP_003479.1	903		chr17		12.3518	6.49227	1.17831	2.43562	5.67883	2.12166	11.0123	2.10992	3.36546	2.55839	5.86091	15.4985	12.1379	10.1576	7.25897	10.0307	10.2197	7.07535	11.1241	6.67936	5.8575	9.50556	2.54731	4.9127	4.68968	4.36109	4.88087	6.88484	3.38123	9.17132	5.79677	6.10676	6.14616	1.81079	3.9416	4.82943	8.20328	8.69568
AKAP1		NM_001242903	0.028819	55163077	55198705		NP_001229832.1	903		chr17		0.360323	0	0.10035	0	0.0301687	0.0333558	0.0337842	0.0908076	0.105042	0.192838	0.0737539	0.50665	0.219988	0.167528	0.334842	0.273359	0.0671774	0.0741171	0.0899619	0.152618	0.07708	0.305706	0.654775	0.108501	0	0.161991	0.356053	0.255179	0.0660806	0.201418	0	0.0490306	0.227306	0.287976	0.0933937	0.100795	0.350038	0.119561
AKAP1		NM_001242902	0.0837588	55163134	55198705		NP_001229831.1	903		chr17		0.711546	0	0	0	0.18897	0.0858283	0.110461	0.0195924	0.370971	0.393212	0.944215	0.14577	0.595901	1.43069	1.2314	1.47933	0.601762	0	0.935935	0.374136	0.485183	0.737322	1.01816	0.218784	0.453955	0	0.573536	0.627372	0.593703	0.247765	0.276826	0.67887	0.857772	0.26134	0.568687	0.343497	0.376251	0.365961
AKAP10		NM_007202	1	19807764	19881169		NP_009133.2	662		chr17		3.27323	3.37509	1.47214	2.67517	3.34843	1.01022	4.01596	1.66378	2.32311	2.46145	3.54552	0.951192	2.60403	3.18358	2.18513	2.07531	2.72554	2.94837	4.3433	2.87387	0.670268	2.63571	1.06698	0.808601	2.35946	2.40214	1.58095	3.46239	1.99331	1.68932	2.3695	2.54249	1.40575	0.527237	1.62679	2.26378	3.54265	1.00616
AKAP11		NM_016248	1	42846288	42897403		NP_057332.1	1901		chr13		2.3913	2.32588	0.866554	0.814745	1.84891	0.693209	3.47627	1.92105	1.1107	1.53561	2.3144	2.46073	3.63644	2.65063	2.31777	2.65967	1.30732	1.31883	2.19672	2.09736	1.42857	1.53561	0.702347	0.917612	1.54284	2.07305	1.2419	1.72413	1.51412	0.950717	1.15624	1.3553	1.93521	0.769503	0.638458	2.47455	1.26303	1.82779
AKAP12		NM_005100	0.435581	151561133	151679694		NP_005091.2	1782		chr6		0	0	0.16126	0	0.0824626	2.67074	0.9143	2.28865	2.00791	2.03413	7.4032	0.0281532	0.0315468	23.6109	0	0.0767362	0.147256	0.422851	0.0363372	0.0776306	0.0476498	0.190327	0.036321	0.0118063	0.733013	4.19431	2.14559	1.33145	5.23729	0.516976	0.632267	3.77813	3.64402	1.38473	2.84166	2.79168	3.45978	0.156958
AKAP12		NM_144497	0.564419	151646665	151679694		NP_653080.1	1684		chr6		0.213564	0.689942	0.529124	0.533939	0.0956174	0.984237	0.233526	3.1218	1.21129	0.155722	4.11622	0.01257	0.0625122	80.8447	1.34739	1.16354	0.621648	2.65302	0.0764741	0.0144162	0.0998534	0.114427	0.25863	0	39.4201	1.58802	3.11723	4.29553	6.97696	1.47157	0.249998	2.76739	7.29089	2.75559	3.31819	6.99191	2.96532	1.03482
AKAP13		NM_007200	0.596409	85923846	86292589		NP_009131.2	2813		chr15		2.22544	0.444933	1.12813	1.24481	0.843581	0.720272	1.55316	3.06399	1.74052	1.67581	4.85586	1.94068	2.6157	1.53846	2.40035	1.12949	0.935417	0.280144	0.118294	0.0997867	0.0246444	0.518732	0	0.983984	1.44425	1.96648	1.91942	2.74937	1.00563	1.12034	1.38111	1.30352	1.72392	0.519327	1.67879	4.68648	3.24968	2.28141
AKAP13		NM_006738	0.134778	85923846	86292589		NP_006729.4	2817		chr15		0.295706	0.0681786	0.0162508	0	0.0644146	0.241558	0.84316	0.396763	0.194382	0.103119	0.762469	0	0.652882	0.49484	0	1.38799	0.229554	0	0.0639173	0.439918	0.0229985	0.449379	0.473546	0.176276	0.0937319	0.261621	0.185626	0.390745	0.659024	0.822639	0.678287	0.230906	0.758789	0.0795394	0.076785	0.467937	0.267805	0
AKAP13		NM_001270546	0.268813	86163180	86292589		NP_001257475.1	1434		chr15		0.0890553	0.942873	0.260021	0.749324	0.691403	0.271886	2.02127	0.628186	1.10913	0.575861	0.662986	0.64727	0.283211	1.12244	0.0869092	1.2359	1.12482	1.21118	2.65131	0.457821	0	2.48508	1.33199	0.305298	0.0597077	1.21609	2.31775	0.0395857	0.271388	0.555443	1.32087	0.74328	0.317392	0.419605	1.03779	1.49261	0.0586567	0.108084
AKAP14		NM_001008535	0.301725	119029935	119037620		NP_001008535.1	89		chrX		0	0.210089	0	0	0.187728	0	0	0	0	0	0	0	0	0	0	0	0	0	0	0	0	0	0	0	0	0	0	0	0	0	0	0	0	0	0	0	0	0
AKAP14		NM_001008534	0.364942	119029935	119054679		NP_001008534.1	137		chrX		0	0	0	0	0	0	0	0	0	0	0	0	0	0	0	0	0	0	0	0	0	0	0	0	0	0	0.0865092	0	0	0.231451	0	0	0	0	0	0	0	0
AKAP14		NM_178813	0.333333	119029935	119054679		NP_848928.1	197		chrX		0	0	0	0	0	0	0	0	0	0	0	0	0	0	0	0	0	0	0	0	0	0.10196	0	0	0	0	0	0	0	0	0	0	0	0	0	0	0	0
AKAP2		NM_001004065	0.334177	112810877	112934791		NP_001004065.2	948		chr9		0.0377004	3.95335	0	1.94487	0.0267393	9.04277	1.39051	3.55299	0.197134	1.58317	1.75816	0.231615	0.113235	1.61154	0.501803	0.100209	0	0.191413	1.04644	0.844697	0.0627296	4.09733	0.236589	1.34982	2.45936	0.684845	0.635109	0.0171609	1.13951	0.179798	0.199235	0.0438937	1.17825	0.717502	0.89918	1.15707	1.32665	4.79343
AKAP2		NM_001198656	0.0096998	112810877	112934791		NP_001185585.1	961		chr9		0	0	0	0	0	0	0	0	0.225816	0	0	0.154304	0	0.0329889	0	0	0	0	0	0	0	0.0210299	0	0	0	0	0.277796	0	0.0187811	0.00925028	0	0	0	0	0	0	0.0802162	0
AKAP2		NM_001136562	0.656123	112887780	112934791		NP_001130034.1	859		chr9		0	10.6371	3.88971	6.1983	0	0	11.034	9.84025	3.40655	5.75222	4.3112	1.52616	0.213884	3.11554	1.35112	0.0283025	0.447548	0.522759	12.1889	4.26699	0	7.69627	2.85541	2.27031	4.89607	4.23095	4.22665	5.46698	3.36503	2.33384	1.31393	4.37645	5.74887	2.42537	0.719412	1.43197	12.2764	5.04683
AKAP3		NM_001278309	0.302326	4724673	4758213		NP_001265238.1	853		chr12		0	0	0	0.132719	0.0112218	0	0	0	0	0.0545942	0	0	0	0	0.0930977	0	0	0	0	0	0	0.0922348	0.207272	0	0	0	0.0444672	0	0	0.133732	0	0	0	0	0	0	0	0
AKAP3		NM_006422	0.697674	4724673	4758213		NP_006413.3	853		chr12		0.0446052	0	0.0719694	0	0	0.0331697	0.0355985	0	0.07523	0	0.0139489	0.0368482	0.245018	0.299067	0	0.0266051	0.0414789	0	0.0351007	0.021808	0	0	0	0	0	0.0343641	0	0.0518028	0.0387473	0	0.032293	0.0849598	0.0304358	0.212014	0	0	0.244391	0.060574
AKAP4		NM_003886	0.333333	49955410	49965664		NP_003877.2	854		chrX		0	0	0	0	0	0	0	0	0.0627492	0	0	0	0	0	0	0	0	0	0	0	0	0.0421729	0	0	0	0	0.0223208	0	0	0	0	0	0	0	0	0	0	0
AKAP4		NM_139289	0.666667	49955419	49965004		NP_647450.1	845		chrX		0	0	0	0	0	0	0	0	0	0	0	0.0722694	0	0.00994474	0	0	0.0748792	0.0503596	0	0.0315854	0	0	0.071108	0	0	0	0	0	0	0.0159636	0	0	0	0.0795348	0	0	0	0
AKAP5		NM_004857	1	64932216	64941221		NP_004848.3	427		chr14		0.201719	0.133866	0.0960234	0.0363584	0.140965	0.0275897	0.0812651	0.281151	0.0511698	0.0856221	0.141724	0.0414622	0.0851551	0.178603	0.209998	0.116068	0.0726406	0.100754	0.36424	0.0456054	0.0397149	0.211433	0.0730524	0.0551731	0.0135803	0.0657293	0.0640009	0.0317604	0.0461753	0.0266213	0.0569782	0.0393854	0.0553093	0.114803	0.142465	0.605416	0.10229	0.146918
AKAP6		NM_004274	1	32798478	33302268		NP_004265.3	2319		chr14		0.0423053	0.0564839	0.0980912	0	0.299162	0	0.861942	0.0517898	0.23185	0.254834	0.795964	0.101933	0.0866615	0.121368	0.0444851	0.0581288	0.103004	0.0611315	0.12452	0.0892978	0.041689	0.180018	0.106188	0.0576647	0.068102	0.351394	0.0413759	0.841727	0.159173	0.146655	0.504185	4.44544	0.101162	0.161029	0.0989898	0.113676	0.101966	0.413915
AKAP7		NM_016377	0.842507	131456825	131604675		NP_057461.2	348		chr6		0	1.89819	0.164936	0	0.228846	0.348008	0.481233	0.336912	0.620714	0.631498	1.24368	0	0.181972	0.63653	0.248988	0.0481508	0.409652	1.0489	2.3638	0	0.135957	0.312685	0	0.0300058	0.177637	1.09363	0.263011	0.238444	0.343325	0.233207	0.562492	0.437668	0.238077	0.258516	0.254173	0.621736	0.192041	0.183177
AKAP7		NM_004842	0.137946	131571298	131604675		NP_004833.1	81		chr6		0	0	0.192978	0.179191	0	0	0.123036	0	0.0544176	0.0617334	0	0	0	0.157866	0.0592253	0	0.334239	0	0	0	0	0.127113	0.167005	0	0	0.0397948	0.0185736	0	0.0615539	0.199855	0	0	0	0.178915	0	0.0783375	0	0
AKAP7		NM_138633	0.019547	131571298	131604675		NP_619539.1	104		chr6		0	0	0	0	0	0	0	0	0	0	0	0	0	0	0	0	0.0958836	0	0	0	0	0	0	0	0	0	0	0	0	0	0	0	0	0	0	0	0	0
AKAP8		NM_005858	1	15464331	15490612		NP_005849.1	692		chr19		7.17487	4.4001	1.90909	3.83389	3.833	1.72783	7.24922	4.52784	3.50002	3.84634	4.72178	3.6472	4.60322	7.16471	4.50936	4.27801	4.46258	3.42028	12.1478	9.68364	3.13094	7.77147	2.96383	2.85003	2.99927	2.91168	5.20896	4.84844	4.10643	4.15405	4.73983	6.72063	5.93074	1.65833	1.78601	3.52979	3.72716	3.99322
AKAP8L		NM_014371	0.837243	15490858	15529932		NP_055186.3	646		chr19		7.25822	0.879683	3.28404	5.00939	3.48931	2.60204	6.02124	6.95302	2.90085	4.76795	5.80105	1.49053	5.06695	8.85884	5.06552	2.27484	2.25053	0.354439	3.87747	2.27228	5.60893	4.57799	0.892568	3.1177	2.95989	3.17579	2.55123	6.87853	3.84819	3.2359	3.70717	8.73528	3.49436	0.88563	1.93668	3.92033	4.67572	5.69926
AKAP8L		NM_001291478	0.0720598	15490858	15529932		NP_001278407.1	585		chr19		0	0	0	1.25774	0	0	0	0	0.978347	0	0.110826	0	0.0806575	0	0	0.710679	2.05344	0	7.09947	0	0	0	0.828721	0	0	0.0523188	0	0.0588321	0	0	0.256281	0	0.107232	0.409444	0	0	0	0.0850711
AKAP8L		NR_111971	0.0906969	15490858	15529932		na	na		chr19		0.372601	0	0.246768	0.415362	0.706588	0.365812	0.917886	0.261066	0.479151	0.905562	0.570553	0.168152	0.219506	0.24156	0.625473	0.360347	0.492774	0	2.36251	0.195584	0.828256	0.487499	0.374834	0.198353	0.267929	0.266418	0.148615	0.392428	0.0668854	0.0798062	0.337344	1.27762	0.325535	0	0.414865	0.379566	0.409771	0
AKAP9		NM_147185	0.201908	91570188	91739987		NP_671714.1	3899		chr7		0.692038	2.05441	0.111706	0	0.313103	0.53681	0.289539	0	0	0.648385	0.769723	0.250947	0.448627	0.613198	0.194393	0.467604	0.546389	4.95095	0.681581	0.21093	0.0890941	0.0853375	0	0	0.189126	0.205781	0.278315	0.335264	0.822392	0.132112	0.63711	0.33136	0.625571	0.760536	0	0.488428	0	0
AKAP9		NM_005751	0.798092	91570188	91739987		NP_005742.4	3907		chr7		2.9882	6.64075	0.607766	0.42924	1.64224	0.540599	2.73548	0.722056	1.63469	2.19376	2.28147	0.493973	1.23063	3.29566	1.96319	1.77059	1.0995	7.14243	1.71831	1.67777	1.47225	2.96082	1.20046	0.925726	0.647017	3.92727	1.14504	2.13996	1.78365	1.20684	2.36254	1.42551	1.33749	0	0.918153	1.98823	1.34355	2.16224
AKIP1		NM_001206648	0.0873473	8932700	8941626		NP_001193577.1	156		chr11		0	0	2.32692	2.62493	0	0	0	0.387883	1.57824	0	0.57674	0.291508	0.397289	0	0	0	0	0.490535	0.568992	1.66489	0	0.82829	1.01652	0	0.306632	0	0	0	0	0	0	0.218557	0	0.800972	0.960918	0	0	0
AKIP1		NM_001206647	0.0254082	8932700	8941626		NP_001193576.1	183		chr11		0.167163	0.784598	0	0	0	0	0	0	0.363434	0	0	0.616519	0	0.220468	0.185663	0	0.210993	0	0.144295	0	0	0	0	0	0.154241	0	0	0	0	0.110757	0	0.655595	0.121188	0	0.738653	0.21741	1.19464	0
AKIP1		NM_001206646	0.308215	8932700	8941626		NP_001193575.1	183		chr11		0	1.06709	0.176285	0.544925	2.23863	1.39424	3.88163	1.22526	1.1464	2.81718	3.49666	0	1.02342	3.18646	1.48147	1.88939	3.44153	8.97801	7.31947	7.88022	0	2.72682	1.41677	0.175447	2.81908	0.509168	5.79666	0.947493	3.34232	0.185707	1.11525	2.28427	1.14479	1.14421	0.898867	1.17847	0.988754	1.26757
AKIP1		NM_020642	0.482095	8932700	8941626		NP_065693.2	210		chr11		1.53697	9.22576	1.30038	0	3.70471	1.70338	5.33191	2.9339	0	3.57488	9.52581	2.20519	3.94506	3.93545	1.91504	3.15071	2.10308	0.482599	4.87928	0.587045	4.27684	0.507545	0	1.35812	4.28312	2.34657	1.46733	2.41191	3.89381	3.23356	4.97014	4.79507	2.41871	0.320302	2.66622	5.77558	2.96566	3.41034
AKIP1		NR_045418	0.0379608	8932738	8941626		na	na		chr11		0	0	0.107299	1.89286	0	0.639888	0.0707302	0.15153	0.215327	0.414369	0.225311	0	0.656636	0.144211	0.16471	0	0.29833	0.311852	0.916723	0	0	0.407707	0	0	0	0.08916	0.57816	0.0976722	0.185183	0	0.183883	0	0	0.293426	0	0.222184	0.158249	0
AKIP1		NR_045417	0.0589738	8932738	8941626		na	na		chr11		0	0	0.48412	0	0.0885681	0.76396	0.123277	0.357015	0	0.554835	0.666515	0.13872	0	0.229654	0.236996	0.0722011	0.194085	0	0.715438	0	0.429207	0.0967284	0	0.129053	0.266114	0.389987	0.166499	0.251368	0.24545	0.114711	1.16254	0.769579	0.186264	0	0.199552	1.04559	0.46655	0.244469
AKIRIN1		NM_001136275	0.278644	39456915	39471737		NP_001129747.1	147		chr1		1.42431	2.82064	3.75377	8.17621	2.98673	1.52658	6.79355	0.574874	11.5849	1.54978	1.31461	1.27845	1.25143	3.16711	0.727625	2.15783	4.19321	7.9634	5.46443	9.32785	0.441369	3.46254	6.48006	0	0.672126	0.515616	5.48766	0.676837	1.72682	1.02494	0.410159	1.02597	1.01392	3.30288	0	1.62361	1.9529	0
AKIRIN1		NM_024595	0.721356	39456915	39471737		NP_078871.1	192		chr1		1.82517	4.45628	2.70846	2.47941	4.08502	2.776	4.13728	16.4946	4.83408	7.82458	17.6992	2.4599	8.23952	7.31469	5.6255	11.0796	5.66218	3.43682	11.7752	3.17875	11.081	2.11606	0.484862	3.6865	10.3999	7.84435	2.5392	8.53614	9.12659	5.0839	19.2296	15.1989	4.82193	0.666402	2.92001	26.7985	11.1127	7.04877
AKIRIN2		NM_018064	1	88384577	88411985		NP_060534.1	203		chr6		3.08572	10.5386	3.8844	11.897	4.10987	3.97913	15.5073	7.80333	13.6268	6.91713	14.741	3.33563	6.25238	8.61556	3.80909	3.17445	7.86344	11.1099	14.6142	4.73581	5.47161	3.73652	4.11749	2.9333	6.56559	3.21368	3.05492	4.08628	3.65561	2.81212	3.99093	6.55071	3.94516	2.66924	3.17785	6.66519	5.62078	4.30886
AKNA		NM_030767	1	117096432	117156685		NP_110394.3	1439		chr9		0.888742	0.122329	0.384914	3.72669	1.05261	0.212308	0.56615	0.857705	2.37328	1.25727	1.86789	6.68089	1.09255	1.0983	1.52757	0.932037	0.6514	0.0636873	19.2445	2.91729	1.02606	11.549	1.87197	0.974721	0.930124	1.34987	0.962785	0.761868	0.496346	0.959255	0.257156	0.418452	1.18565	0.508959	0.511706	0.345658	1.55875	1.06671
AKNAD1		NM_152763	0.352421	109358519	109399726		NP_689976.2	836		chr1		0	0	0	0	0	0	0	0.02454	0.0852384	0.0278328	0.058994	0	0	0	0	0	0	0.109644	0	0	0	0.0199151	0	0	0	0	0.0225824	0.0387183	0	0.0193985	0.0262432	0	0	0.107012	0	0	0	0
AKNAD1		NR_049760	0.647579	109358519	109400864		na	na		chr1		0	0.115547	0.0439886	0	0.0236324	0	0	0	0	0	0.0598669	0	0	0.036326	0	0.0197593	0	0.0738177	0	0.0218044	0	0.0249605	0	0	0	0	0.0698892	0	0	0.0197507	0	0.0343067	0.0331716	0	0.023979	0	0	0
AKR1A1		NM_153326	0.185551	46016454	46035723		NP_697021.1	325		chr1		1.24164	0.117869	1.33352	5.52379	1.14366	2.73461	0.899661	1.81472	7.15986	2.42492	8.68939	6.54136	5.21209	0.942698	6.58616	6.76014	10.4698	1.24388	13.2478	0	2.51027	2.70078	1.26904	6.04327	2.13902	1.57849	1.87259	1.17847	0	1.42264	6.15417	3.9616	1.06037	2.19411	0.896451	3.03717	0.0900361	1.08702
AKR1A1		NM_001202413	0.61123	46016454	46035723		NP_001189342.1	325		chr1		8.06271	2.42925	7.34948	12.2356	20.1823	1.40993	46.4341	19.0513	7.88998	13.8412	16.2586	8.59248	11.6697	34.5061	13.4746	9.85224	15.54	3.06264	49.26	18.4256	6.17205	22.1924	24.8459	11.3084	8.88718	8.12526	21.7286	10.3086	48.3013	5.15288	15.5097	9.2845	8.25927	1.85219	4.74915	10.3526	8.21817	7.73859
AKR1A1		NM_006066	0.0538839	46016454	46035723		NP_006057.1	325		chr1		0	0	0.283859	3.15826	0	0	0.0808961	0.962014	1.60701	0.900487	1.57326	0	0	0.334994	0.329537	1.94268	0	0	0	0	2.11901	0.242763	0	0	0.482361	0.494043	0.162933	1.64361	5.31156	0.298961	0	0	0.261129	0.409564	0.280859	0.619487	3.26634	0.442528
AKR1A1		NM_001202414	0.149335	46016454	46035723		NP_001189343.1	325		chr1		0	0	1.33311	0	1.75389	1.88064	2.87743	3.13872	1.60062	4.22977	8.38416	5.04934	5.90331	1.10914	6.60894	2.5296	7.49898	0	18.5925	0.18368	0.810358	1.55387	0.229847	4.35016	3.51952	2.08521	1.95517	3.24666	10.7345	0.909378	7.56299	5.01181	1.66342	0.312477	1.26501	6.12466	4.23492	2.58368
AKR1B1		NM_001628	1	134127106	134143888		NP_001619.1	316		chr7		0	111.083	29.327	11.8981	0	16.1118	192.54	29.8983	31.2247	71.1063	61.1527	0.518966	0.0956482	22.1099	0.0886779	0.0972555	0	36.2147	79.4656	6.99842	0.941666	75.5303	19.2093	25.4051	16.1111	22.9286	48.2209	33.8663	21.1664	32.3169	55.0414	53.798	68.2128	27.6447	155.26	180.323	85.241	0.751607
AKR1B10		NM_020299	1	134212343	134226166		NP_064695.3	316		chr7		0	0.0463181	0.135325	0.177713	0	0	9.66921	0.154782	4.14364	1.37978	1.04786	6.02796	146.311	0.122059	0	1.35879	0.18496	0	0	0	0	0.0714453	0.179863	0	0	0	0.145145	0.20163	0	0.0192965	0	0.125225	0.160446	0.834456	324.57	5.15225	0.513411	0.23086
AKR1B15		NM_001080538	1	134233848	134264592		NP_001074007.2	344		chr7		0	0	0	0	0	0	0.950015	0.0291904	0.0631002	0.0240797	0	0.1268	4.02815	0	0	0	0	0.0460262	0	0	0	0.0591479	0.147257	0	0	0	0.047048	0.0428102	0	0.0329575	0	0	0	0.101306	4.94925	0.11978	0.0586289	0
AKR1C1		NM_001353	1	5005453	5020158		NP_001344.2	323		chr10		0.164551	0.0870071	4.01387	3.08064	0.137108	0	67.7768	0.316788	36.1037	10.4873	0.954619	50.0367	246.818	0.327427	0	0.465653	0.520672	2.70352	1.30274	0.120813	14.1649	0.225285	0.300809	0.0839585	0.149712	0.144273	0.58275	0.40307	0.746871	0	0.202371	0.280368	0	1.59001	173.671	15.6905	0.410185	0.298377
AKR1C2		NM_205845	0.924966	5029967	5060225		NP_995317.1	323		chr10		0.0876225	0	0.494035	0.600205	0.0337513	0	6.50694	0.0330284	6.59253	0.93644	0.185852	0	27.6833	0.0333385	0	0.0806692	0.091049	0.980944	0.290599	0.0308684	1.90189	0.0533348	0.183616	0.0318002	0.0386624	0.0336785	0.130833	0.0905757	0.277096	0	0	0.199763	0	0.3963	141.123	9.30969	0.0671449	0.037437
AKR1C2		NM_001354	0.0471645	5029967	5060225		NP_001345.1	323		chr10		0	0	0	0	0	0	0	0	0	0	0	15.3669	34.8794	0	0	0	0	0	0	0	0	0	0	0	0	0	0	0	0	0.0282655	0	0	0	0	3.40432	0	0	0
AKR1C2		NM_001135241	0.0278696	5042102	5046206		NP_001128713.1	139		chr10		0	0	0	0	0	0	0	0	0.231199	0	0	0.25663	9.14173	0	0	0	0	0	0	0	0	0	0	0	0	0	0.178987	0	0	0	0	0	0	0	7.30171	0.936318	0	0
AKR1C3		NM_001253908	0.316162	5090957	5149878		NP_001240837.1	323		chr10		0	0.669295	0.515524	0	0.0671553	0	7.89911	0.265316	0.814843	0.0965694	0	0	0.621776	0.156873	0	0	0	73.1276	0	0.162897	0	0.373619	0	0	0	0	0.229045	0.266544	0	0	0	0	0	0	24.0871	0	0	0.519756
AKR1C3		NM_001253909	0.013472	5136567	5140368		NP_001240838.1	138		chr10		0	0	0.156535	0.331339	0	0	0.291734	0	3.70927	0.336829	0	1.38093	9.81015	0	0	0	0.13731	0	0.290975	0	0	0	0	0	0	0	0	0	0	0	0	0	0	0	6.14938	0.197823	0	0
AKR1C3		NM_003739	0.670366	5136567	5149878		NP_003730.4	323		chr10		0	0	1.20259	3.06856	0	0	16.7285	0.35525	28.2467	13.2967	2.28312	107.409	284.883	0.235768	0	2.03468	1.71319	2.3773	27.2726	0	1.52678	0.821124	0.370782	0.547564	0.809576	0	0.0352273	0	0.320658	0	0	0.521922	0.268781	0.852719	234.924	26.0213	1.08845	0
AKR1C4		NM_001818	1	5238797	5260910		NP_001809.3	323		chr10		0	0	0	0	0	0	0.496781	0	0.303228	0.196513	0.0504917	2.9381	5.69666	0	0	0.0461307	0	1.09276	0.17129	0	0	0.0378121	0	0	0	0	0.0359328	0	0	0.0232007	0	0	0	0.109784	3.56233	0.175634	0.0570403	0
AKR1C6P		NR_026743	1	4913858	4958465		na	na		chr10		0	0	0	0	0	0	0	0	0	0	0	0	0	0.0280976	0	0	0	0	0	0	0	0.0692511	0	0	0	0	0.0322008	0	0	0.0412803	0	0	0	0	0	0	0	0
AKR1C8P		NR_027916	1	5196654	5227150		na	na		chr10		0	0	0.0963774	0	0	0	0	0	0	0	0	0	0	0	0	0	0	0.0443622	0	0	0	0.0342838	0.0814813	0	0	0	0.0252334	0	0	0.0267186	0	0	0	0.0932973	0.0494149	0	0	0
AKR1D1		NM_001190907	0.388889	137761177	137803050		NP_001177836.1	290		chr7		0	0	0	0	0	0	0	0	0.0554753	0	0	0	0	0	0	0	0	0	0	0	0	0.016229	0	0	0	0	0.0179469	0	0	0.0188285	0	0	0	0	0	0	0	0
AKR1D1		NM_001190906	0.611111	137761177	137803050		NP_001177835.1	285		chr7		0	0.0197288	0.0566885	0	0	0.140698	0	0	0	0	0	0	0	0	0	0	0	0	0	0	0	0	0.14943	0	0	0	0	0.0749677	0	0	0	0	0	0.210485	0	0	0	0
AKR1E2		NM_001271025	0.282579	4868368	4890251		NP_001257954.1	222		chr10		1.06377	0	0	0.342336	0.146207	0	0.0684028	0	0	0	0	0	0.416147	0	0	0	0	0	0	0.120025	0.257256	0	0.125389	0.140798	0	0	0	0.148806	0.560228	0.334046	0	0.156107	0	0	0.467719	0.590118	0.809066	0
AKR1E2		NM_001271021	0.144964	4868368	4890251		NP_001257950.1	263		chr10		0.505808	0	0.136533	0	0	0	0	0.0289197	0	0	0	0	0	0	0	0.0854503	0	0	0	0	0	0.164684	0	0	0	0	1.60628	0	0	0.0473491	0	0	0	0	0.0875548	0	0	0
AKR1E2		NR_073127	0.214783	4868368	4890251		na	na		chr10		0	0	0	0	0.117513	0	0	0	0	0	0	0	0.775649	0.145535	0	0.389776	0	0	0	0.40172	0.166593	0	0	0	0	0	0	0.0489865	0	0	0.120137	0.284392	0	0.0909775	1.09917	0.683193	0	0
AKR1E2		NR_073126	0.145178	4868368	4890251		na	na		chr10		0	0.146285	0	0	0.274386	0	0	0	0	0	0	0	0.288953	0.501167	0	0	0	0	0	0.123789	0	0	0	0	0	0	0.191832	0	0.457392	0	0	0	0	0	0	0.872573	0	0.294998
AKR1E2		NM_001040177	0.114877	4868368	4890251		NP_001035267.1	320		chr10		0	0	0	0	0	0	0	0	0	0	0	0	0	0.246644	0	0	0	0.163943	0	0	0	0	0	0	0	0	0.165248	0	0	0.0460064	0.196281	0.267772	0	0	0	0.723191	0	0
AKR1E2		NR_073125	0.0976189	4868368	4890251		na	na		chr10		0	0	0	0	0.305554	0	0	0	0	0	0	0	0	0	0	0	0	0	0	0	0	0	0	0	0.275198	0.261602	0	0.105298	0	0	0	0.581318	0	0	0	0	0.491251	0
AKR7A2		NM_003689	1	19629201	19638640		NP_003680.2	359		chr1		9.25901	4.34366	7.43678	4.18993	16.3794	4.44581	18.1614	13.4468	8.99015	15.9013	11.4985	7.55613	9.80264	21.8954	6.3126	10.8286	9.74421	2.86695	32.053	17.5755	5.04886	7.89924	7.60099	7.18339	3.77389	9.93612	13.7678	8.93852	17.2908	6.69194	22.3469	21.4683	10.6961	4.42926	4.67172	8.1309	10.0888	9.05643
AKR7A2P1		NR_002796	1	113465971	113467295		na	na		chr1		0.245791	0.114742	0.437538	0.218612	0.305144	0.383478	0.524017	0.310416	0.289974	0.676731	0.800349	0.297809	0.386234	0.332563	0.443546	0.499305	0.387699	0.0989331	0.238048	0.153265	0.165869	0.374291	0.588569	0.324265	0.132512	0.23938	1.38477	0.796004	1.35192	0.552792	0.357926	0.564423	0.140757	0.453927	0.27253	0.201624	0.366681	0.435124
AKR7A3		NM_012067	1	19609056	19615280		NP_036199.2	331		chr1		0.353769	0.173731	0.193111	0	1.18295	0.285879	0.37016	0.442438	0.133438	0.61857	0.644351	7.37473	2.27391	0.526527	0.450154	3.63668	1.844	0.51934	1.69936	0.630297	0.146251	0.323321	0.304258	0.103254	0	0.253274	0.903813	0.413334	0.360947	0.230466	0.609157	0.317237	0.179029	0.146902	0	0.181581	0.249278	0.348247
AKR7L		NR_040289	0.216765	19592475	19600568		na	na		chr1		0	0.258049	0	0.121465	0	0	0	0.0613353	0.173761	0	0.0919466	0	0	0	0.142125	0.204095	0	0.855986	0	0.194154	0	0.217354	0.349422	0	0	0	0	0	0	0	0	0	0	0.200549	0.0500302	0	0	0
AKR7L		NR_040288	0.783235	19592475	19600568		na	na		chr1		0.301866	0	0.159357	0	0.460903	0.204469	0.34753	0.238463	0	0.443238	0.280056	0.429822	0.415013	0.395378	0.15756	0.71259	0.270205	0	1.22045	0.0942387	0.0638136	0.0932696	0	0.0789782	0.0518455	0.141658	0.526806	0.084815	0.232328	0.202399	0.383461	0.208147	0.222963	0	0	0.10054	0.153874	0.170759
AKT1		NM_005163	0.114247	105235686	105259938		NP_005154.2	480		chr14		5.72418	0.135721	0.92572	0.666767	2.55017	4.10353	1.44813	2.18371	0.499199	2.22443	3.44179	0.240512	3.26741	1.29471	4.47688	0.974262	0.763073	0.0829651	1.37265	0.102263	3.93135	0.534954	0.597864	1.80927	2.32592	3.49489	2.25253	8.59648	2.35231	2.27101	3.24352	4.09215	5.22152	1.12615	1.25653	2.20571	3.67256	0.452388
AKT1		NM_001014431	0.884182	105235686	105262080		NP_001014431.1	480		chr14		58.6627	1.37697	15.4088	20.9271	31.3037	15.9235	48.1794	24.223	24.2012	31.9673	31.3417	7.40571	23.3984	19.8906	19.7218	12.5616	13.859	0.166014	100.617	6.1301	6.04113	11.8229	5.02462	3.00745	15.2655	22.4736	24.4341	29.013	19.5538	22.1224	27.3905	41.0368	28.4986	11.1207	9.02617	27.6308	34.0519	15.1517
AKT1		NM_001014432	0.00157013	105235686	105262080		NP_001014432.1	480		chr14		0	0	0	0	0	0	0	0.460224	0	0	0.162272	0.151756	0	0.500153	0	0	0	0	0	0	0	0	0	0	0.218391	0	0	0	0	0	0	0	0	0	0	0	0	0
AKT1S1		NM_001278159	0.0444031	50372289	50379506		NP_001265088.1	256		chr19		0.755562	0	0.28395	0.319617	1.12073	0.482083	0.215815	0.378551	0.272825	0.572459	0.859502	0.488337	1.05868	0.314696	0.760507	0.658051	0.353144	0	0.241923	0.603749	0.853163	0.929219	0.702815	0.0976263	0.661149	0.239398	0.411001	1.40685	1.52687	0.460933	0.525587	1.74735	0.634015	0.469844	1.13591	1.06301	0.405074	1.17494
AKT1S1		NM_032375	0.0874664	50372289	50380644		NP_115751.3	276		chr19		0.999618	0.538934	0.933324	0.636429	0.400004	0.933774	0.997524	1.21188	1.00636	1.31413	1.11825	1.65206	2.29105	0.943647	1.84805	1.77662	1.34136	0	0.788289	0.928685	1.83772	0.927384	0.88509	0.88818	0.688447	1.07417	1.87283	2.34551	1.99118	1.10163	0.485316	1.25366	3.12083	0.407462	0.510903	1.86613	0.653655	1.97011
AKT1S1		NM_001098632	0.0793139	50372289	50380644		NP_001092102.1	256		chr19		0.504885	0	0.504214	0.722263	0.924427	5.66361	0.855883	0.773171	1.02173	1.28453	1.57499	0.374853	0.802542	0	0.274622	1.78563	1.94223	0.0587309	0.61133	0.838459	2.2695	0.449012	1.17686	0.914496	0.722178	0.104464	2.7654	0.516975	0.899464	0	0.818876	1.3873	1.50424	1.43921	1.51831	0	0.0949783	0.898113
AKT1S1		NM_001098633	0.645763	50372289	50380644		NP_001092103.1	256		chr19		12.7253	0.992108	10.2335	8.61965	15.2802	0.694001	32.6375	16.4252	19.8383	16.0547	15.1358	3.78492	12.8854	13.6218	8.08068	13.4699	13.103	0	7.17448	0.847935	5.90761	1.68772	0.874692	7.47552	14.1649	4.90082	9.18169	6.55321	11.6395	8.69859	16.1807	31.4252	18.5873	3.68751	8.21159	17.2498	5.16815	19.5569
AKT1S1		NM_001278160	0.143054	50372289	50381613		NP_001265089.1	256		chr19		1.31538	0.100649	3.34209	8.62019	2.47246	0.359226	0.827091	0.77925	3.79319	3.54925	2.53364	1.50139	2.19209	1.03355	0.742316	3.90166	2.55687	0.272085	0.235243	0.618148	2.25129	0.980771	2.29884	1.64362	0	0.931425	6.28897	2.52079	5.65448	1.15979	0.423569	1.77366	1.93725	3.52229	4.22385	0	2.16337	0.25838
AKT2		NM_001243028	0.10222	40736223	40791302		NP_001229957.1	419		chr19		0.369861	0	0	3.31167	0.379489	0	1.28441	1.09747	2.82328	1.46599	1.10164	0.501625	0.102888	0.192415	0.412272	0.451334	0.630394	0	16.0395	0.419464	0.177695	0.238418	0.771752	0.0702128	0.395515	0.417443	1.33949	0.282554	0.340692	0	1.05873	1.68281	0.617124	1.18046	0.30026	0.482739	0.545632	1.21162
AKT2		NM_001626	0.891345	40736223	40791302		NP_001617.1	481		chr19		9.22487	1.19932	4.98292	4.20482	7.04094	4.15935	13.9888	18.4133	6.63172	11.1751	10.088	8.66346	11.1277	5.21154	8.79497	11.1766	5.62937	0.245053	5.0691	4.21494	6.87758	9.17943	1.17897	4.77003	7.1041	6.78331	6.83956	8.24154	12.2165	7.74388	9.08091	14.9893	11.3463	1.73039	10.9627	9.63753	16.8939	12.5924
AKT2		NM_001243027	0.00643507	40736223	40791302		NP_001229956.1	419		chr19		0	0	0.140507	0	0.0805321	0	0	0	0	0.176265	0.0543871	0	0.0554892	0	0.0680077	0.241511	0	0	0.0571296	0	0.0764429	0	0.098229	0.317862	0.0290665	0	0.796673	0.108689	0	0.0223182	0	0.139835	0	0	0	0	0.0822261	0.119792
AKT3		NM_181690	0.00638064	243651534	244006584		NP_859029.1	465		chr1		0	0	0	0	0	0	0.112099	0	0	0	0	0	0	0	0	0	0	0	0	0.0379953	0	0	0	0	0	0	0	0.0809612	0	0	0	0	0	0	0	0	0	0.149055
AKT3		NM_005465	0.895017	243663020	244006584		NP_005456.1	479		chr1		0.0351853	5.65745	5.57596	2.84033	0.023468	1.79753	2.57199	7.33245	3.33792	5.14731	2.39993	0.0381464	0.0605654	0.165977	0.182246	0.0176398	0.118011	0.399425	4.28024	0.244625	0.0486255	1.60696	0.142083	0.0313502	2.80947	4.29051	3.22882	2.78464	2.36145	1.46244	4.12581	4.15443	2.20473	1.1432	2.05108	0.0936977	5.68981	4.91521
AKT3		NM_001206729	0.0986028	243663020	244006886		NP_001193658.1	465		chr1		0	0	0.167502	0	0	0.286825	0	1.80198	0.10537	0.395575	0.411592	0	0	0	0	0	0	0.132212	0	0	0	0	0	0	0.625206	0.900147	0	0.41504	0.211671	0.0204826	0.176759	0.662437	0.3112	0	0.218424	0	0.24829	0.927747
AKTIP		NM_001012398	0.0582159	53524951	53537216		NP_001012398.1	292		chr16		0	0	0	0	0.0981555	0.362364	0	0	0.597865	0.121312	0.189575	0	0	0.223451	0	0	0	0	0	0	0	0.143555	1.4423	0	0	0	0.19671	0.153294	0	0.0484929	0.330804	0	0	0.387168	0	0	0	0
AKTIP		NM_022476	0.362294	53524951	53537216		NP_071921.1	292		chr16		2.11306	3.49752	0	0	2.73595	0	2.13796	0.28482	2.05164	0.554073	1.40281	0.194878	0.437073	2.7362	0.702984	0.986574	0.775902	0	1.70919	0	0.246537	0.582178	0	0.127692	0.428632	0.0944407	0	0.894106	0.204169	0	0.43556	0.535937	0.404249	0	0.710976	1.32915	1.03355	0.751322
AKTIP		NM_001308325	0.579491	53524951	53537216		NP_001295254.1	293		chr16		1.88449	3.65288	0.732292	0.543252	4.08357	0.527858	3.14793	0.246016	2.87911	0.991242	1.99905	0.569353	1.04402	2.6262	1.89578	1.15017	1.45035	6.0128	2.82627	1.39561	0.165862	0.338112	1.35872	0.934553	0.765222	0.552753	0.993429	0.805504	0.299786	0.2854	0.478037	0.605423	0.390853	0	0.462797	1.67077	1.62974	1.26741
ALAD		NM_000031	1	116148591	116163618		NP_000022.3	330		chr9		4.15519	2.7062	1.6107	1.68213	6.11261	1.06222	3.88443	2.4921	2.53819	8.57052	2.44049	3.16378	3.06071	2.42001	2.7268	2.79967	2.61275	1.54717	7.71254	4.26621	0.956373	3.54747	2.22641	1.15353	3.44002	3.61402	4.75742	3.52248	3.24207	2.3532	2.31372	5.2254	7.75649	3.2087	1.19682	1.72443	1.8261	1.62949
ALAS1		NM_199166	0.702316	52232098	52248343		NP_954635.1	640		chr3		5.29986	6.13632	4.52528	13.3675	7.87903	1.55591	11.7594	4.84951	6.9848	3.20575	11.7067	6.57394	18.3178	16.0572	8.51871	7.81786	16.6614	0	7.60779	22.6256	1.84714	4.62203	0	4.43458	7.40752	13.4926	13.1426	4.888	11.6073	14.8702	16.0554	8.15877	9.77897	4.09575	4.75837	8.48792	10.1802	6.24251
ALAS1		NM_001304443	0.159926	52232098	52248343		NP_001291372.1	640		chr3		0	0.565702	0	0	0	1.40649	12.5539	0	1.38	1.60518	1.81822	0	2.43019	0	0	0.625594	4.17392	3.85028	9.19181	5.15783	0	0.180678	4.47577	0	2.62379	1.44172	0.355415	1.42941	2.31465	11.8304	2.55389	4.99697	0	0	0.514025	0.191626	3.80927	1.92253
ALAS1		NM_000688	0.119851	52232098	52248343		NP_000679.1	640		chr3		0.886362	0.0536705	1.01889	0	0.605361	0.837321	1.48668	0.438962	0.752419	0.693017	1.75349	0.274967	1.74727	1.41553	1.74701	1.08263	1.12294	0	1.17736	0.714992	1.30391	0.384833	0	0	1.79674	1.36867	0.558111	2.09212	0.935495	1.84672	2.1384	3.58873	3.62397	0	1.03889	2.04169	4.22299	1.85304
ALAS1		NM_001304444	0.0179072	52232098	52248343		NP_001291373.1	657		chr3		0	0	0	0.904227	0.361435	0	0.265919	0	0	0	0.092044	0	0	0.071059	0	0	0.303621	0	0.109867	0	0.481762	0	0.182996	0	0.27645	0	1.69122e-21	0.359954	0.313701	0.0183012	0.693067	0.191488	0.952754	0	0	0	0	0.19817
ALAS2		NM_001037967	0.754369	55035487	55057497		NP_001033056.1	550		chrX		0	0.277856	0	0	0.0395528	0.0576333	0.0672625	0	0	0.0746395	0	0.0433948	0	0.0395848	0	0	0.0444868	0	0	0.0497015	1.71065	0.0934693	0.127598	1.76245	0	0	0.154176	0	0.494124	0.0370813	0	0	0	0.103991	0.0604925	0	0	0
ALAS2		NM_000032	0.0934323	55035487	55057497		NP_000023.2	587		chrX		0	0	0	0	0	0	0	0	0	0	0	0	0	0.0476954	0	0	0	0.210471	0	0	1.95303	0	0	0	0	0	0.0493883	0	0	0	0	0	0	0	0	0	0	0
ALAS2		NM_001037968	0.152198	55035487	55057497		NP_001033057.1	574		chrX		0	0	0	0	0	0	0	0	0	0	0.0573621	0	0	0.0494357	0	0	0	0	0	0	0.174537	0	0	0	0	0	0.0765388	0	0	0.0371404	0	0	0	0	0	0	0	0
ALB		NM_000477	1	74269971	74287129		NP_000468.1	609		chr4		0	0.0479575	0.0739661	0	0.0396192	0	0	0	0.046365	0.0192434	0	0	0	0.0328557	0	0	0	0.457649	0.0920647	0	0	0.0514998	0	0	0	0.04995	0.0449043	0	0	0.0329577	0	0	0	0.0880018	0	0.0417263	0	0
ALCAM		NM_001243283	0.0422776	105085556	105244230		NP_001230212.1	133		chr3		0.140552	0.586243	1.06568	0.823193	0.0556422	0.160175	0.428017	0.35072	0.136257	0.144611	0.387737	0.207578	0.226765	0.184892	0.221624	0	0.613171	0	0.0321259	0.159614	0	0.0919849	0	0	1.11828	0.0639002	0.55024	1.08144	0.170519	0.0643348	0	0	0	0	0.315931	0.216835	0.695351	0.493848
ALCAM		NM_001243281	0.0666582	105085556	105272014		NP_001230210.1	555		chr3		0	0.273302	1.08043	1.50213	0.224171	0	0.141123	0.238598	0.210158	0.095412	0.299007	0.0527415	0.241092	0.113747	0.247504	0	0.328156	0.0796567	0	0	0	0.0471387	0	0.0781269	0.57504	0.125918	0.0454276	2.14709	0.267316	0.0926907	0.0592663	0.119558	0.0476167	0.150611	0.2294	0.242527	0.492809	0.141415
ALCAM		NM_001243280	0.309271	105085556	105295757		NP_001230209.1	570		chr3		0	13.4907	7.22016	12.859	1.64126	0	5.44631	3.21599	0	0.925111	3.98564	1.85939	0.758292	3.00471	0.600422	0	2.735	0	0.309986	5.91722	0.108554	0.908329	0.219492	0.027969	4.95123	0	0.426593	1.81591	0.848851	0	0	0.695613	0.244736	0.314162	0	1.67882	2.35244	1.14302
ALCAM		NM_001627	0.581793	105085556	105295757		NP_001618.2	583		chr3		0.784959	33.9271	9.80202	9.21547	1.47757	5.73717	3.19538	9.50592	4.71168	3.82928	12.763	4.3442	1.90516	7.47582	0.579507	0.190225	12.3958	8.14548	1.02003	0.307456	0	0.286996	0	0	21.0867	1.11374	0.732664	5.77698	0.369569	1.55039	0.0911478	1.06643	0	0	4.72672	6.50878	9.02605	8.64956
ALDH16A1		NM_001145396	0.697889	49956472	49974305		NP_001138868.1	751		chr19		2.35057	1.16452	1.04738	0.983606	3.45487	0.74301	6.59696	1.23287	3.25535	2.49797	1.13485	1.30094	0.967885	3.3658	1.61283	4.32853	1.62606	0.155987	9.76508	3.92996	1.42583	2.812	2.26237	2.48851	1.46831	2.65791	6.74156	0.916821	1.31712	1.82866	1.94534	2.29008	0.824641	1.1614	2.54308	1.27598	0.743804	1.06471
ALDH16A1		NM_153329	0.302111	49956472	49974305		NP_699160.2	802		chr19		2.13071	0	0.250465	1.08047	0.295219	0.15317	0.373595	1.66334	1.08284	0.628037	1.87826	0.896829	3.58967	0.455026	0.925788	1.60329	0.184542	0	2.06014	0.181777	0.2471	0.662674	0	0.303074	0.465183	0.332048	0.541199	1.67052	1.57593	0.240772	1.43888	2.4041	3.97327	0.563172	0.36622	1.4274	0.288172	0.888036
ALDH18A1		NM_002860	0.775583	97365685	97416567		NP_002851.2	795		chr10		3.23461	9.53155	5.23535	8.50983	5.9972	4.02671	7.0349	8.92728	7.46399	7.37555	9.67555	1.40199	9.21309	6.04999	9.52716	3.31424	11.0257	23.3424	18.156	9.78644	5.36211	6.77853	3.09703	3.5206	3.55592	3.90909	3.50247	5.74116	3.64547	2.62827	4.64648	4.71253	9.62504	0	3.78272	6.41415	7.38113	4.72793
ALDH18A1		NM_001017423	0.224417	97365685	97416567		NP_001017423.1	793		chr10		3.10309	5.50338	0	0.193275	2.22262	0	0	1.05924	0	0.229538	2.31512	4.47491	3.62705	2.50431	3.93818	4.49478	1.54478	0	2.0141	2.06179	0.37012	4.5539	1.04545	1.37249	0	1.00717	3.50807	0.960323	1.32774	0	0	0.753484	2.25801	4.29091	0.278005	0.341628	1.20139	0.368651
ALDH1A1		NM_000689	1	75515577	75568233		NP_000680.2	501		chr9		0	0	0.0768334	0	0	0	0.533725	0	0.0465873	0.035687	0.0237956	24.7454	94.8054	0	0	26.9325	23.7923	0.127438	0	0.0501005	0.676001	0.0189698	0	0.426836	0	1.23156	0.716358	0.754893	3.94442	0.587669	4.28555	1.48596	4.90511	2.96143	313.21	29.9771	0	0
ALDH1A2		NM_170697	0.274338	58245621	58306295		NP_733798.1	422		chr15		0	0	0.0490294	0	0	0	0.0375937	0	0.294921	0	0	0	0	0	0	0	0	0.817923	81.8222	0	1.35439	33.4261	0	0	0	0	0	0	0	0	0.141015	0.0361721	0	0.163942	0	0	0	0
ALDH1A2		NM_170696	0.561096	58245621	58358121		NP_733797.1	480		chr15		0	0	0	0	0	0	0.144301	0	0	0.0660269	0	0.0191164	0	0.024702	0	0.0186654	0	0.667623	0.201696	0.0624268	0.19223	0.831769	0.187619	0	0	0	0.0382016	0	0	0.0432625	0.0487528	0	0	0.109245	0	0	0.0232954	0
ALDH1A2		NM_003888	0.150858	58245621	58358121		NP_003879.2	518		chr15		0	0	0	0	0	0	0	0.0182955	0	0	0	0	0	0	0	0	0	0	0	0	14.1967	0	0	0	0	0	0	0.0238515	0	0	0	0	0	0	0	0.0486082	0	0
ALDH1A2		NM_001206897	0.0137075	58245621	58358121		NP_001193826.1	497		chr15		0	0	0	0	0	0	0	0	0	0	0	0	0	0	0	0	0	0.0491294	0	0	2.10899	0.0598209	0	0	0	0	0.0205421	0	0	0	0	0	0	0	0	0	0	0
ALDH1A3		NM_001293815	0.422925	101419896	101456830		NP_001280744.1	405		chr15		0.0610011	0.813773	0.0613542	0.937079	0.528694	0	32.8149	0.0841485	0.356873	0.901623	7.9591	0.029052	0.463104	14.5679	0	2.94591	3.66085	2.50651	0	0.523716	0	0.0461639	0	0.0603839	5.03365	20.8232	17.2835	0.0749263	3.45507	0.0890673	0.272394	0	0.164899	0.15488	0.311953	0.116096	0.132048	0.237116
ALDH1A3		NM_000693	0.577075	101419896	101456830		NP_000684.2	512		chr15		0	0.0316417	0.432181	0.752968	0.259777	0.897124	16.7931	0.155374	0.0739339	0.750369	10.6386	0	1.15531	12.473	0.698174	1.92803	1.5054	0.166499	0.0281165	0.0384501	0	0.0995361	0.248818	0.176742	12.2426	31.7413	11.626	8.42942	7.89451	0.0455547	0.226355	0.220632	0	0	0.624505	4.3613	6.39425	1.46394
ALDH1B1		NM_000692	1	38392660	38398662		NP_000683.3	517		chr9		5.98414	5.24325	11.2745	6.42827	1.81487	3.73683	6.71973	21.4777	3.85607	3.48554	9.66663	4.0248	13.5954	11.6252	14.2201	2.75375	5.20715	1.75659	2.6581	7.21366	7.3796	0.239425	2.04854	1.95028	5.71049	7.94005	3.11904	9.0507	8.44217	13.3017	12.003	10.0118	9.10224	4.13604	5.97855	4.68181	6.31158	4.5458
ALDH1L1		NM_001270365	0.21236	125822403	125899645		NP_001257294.1	801		chr3		0	0	0	0	0	0	0	0.035678	0	0	0	0.0303769	0	0	0	0.043964	0	0	0	0	0	0	0	0	0.0408562	0	0	0	0	0.05299	0	0	0	0	0.0988901	0	0	0
ALDH1L1		NR_072979	0.258959	125822403	125899645		na	na		chr3		0	0	0	0	0	0	0.0258153	0	0	0	0.0223249	0	0	0	0.07985	0	0.0309441	0.0434066	0	0	0	0.0398215	0.42901	0	0	0	0.0280864	0.0572242	0.0344842	0.0391087	0	0	0	0.116064	0	0	0	0
ALDH1L1		NM_012190	0.0801621	125822403	125899645		NP_036322.2	902		chr3		0	0	0	0	0	0.0944399	0	0	0	0.0153196	0	0	0	0	0.72741	0.0507345	0	0	0	0	0	0	0	0	0	0	0	0.0590366	0	0	0	0	0	0	0	0	0	0
ALDH1L1		NM_001270364	0.448519	125822403	125900029		NP_001257293.1	912		chr3		0	0	0.0920804	0	0	0.0692455	0.0266978	0	0	0	0	0.0407748	0	0.02596	1.74055	0	0	0	0.0275977	0.0441677	0	0.0665696	0.362842	0.0238902	0	0	0.0750901	0.790536	0	0.161883	0	0	0.143985	0	0	0	0	0
ALDH1L1-AS2		NR_046383	1	125898907	125929011		na	na		chr3		0	0.0932907	0.162212	0	0	0.036855	0	0.0489589	0.0930883	0.0257437	0.0222841	0.0397639	0	0.0278444	0.175813	0	0.070811	0.0526924	0	0.0451552	0	0.0856646	0.192805	0	0	0.0243347	0.11232	0.0332547	0	0.0820169	0	0	0	0.267587	0.0440237	0	0	0
ALDH1L2		NR_027752	0.356109	105413561	105478341		na	na		chr12		0.105591	0.0498595	1.34031	0	0.0384759	0.169887	0.122854	0	0	0.109746	0	0.0134753	0.0751632	0	0.1001	0.0746892	0.151117	0.381564	0.0181355	0	0	0.0800536	0	0	0.0260853	0.090731	0.120456	0	0	0.319263	0	0	0.0606445	0	0.34293	0	0	0.149714
ALDH1L2		NM_001034173	0.643891	105413561	105478341		NP_001029345.2	923		chr12		0	0	3.18041	3.10661	0.581651	0.294123	0.430987	2.67335	0.329643	1.78411	0.33143	0	0	0.193495	0	0	0.0621406	0	0	0.400372	0.766903	0	1.13663	0.160931	0	0.31959	0	0.104837	0.412894	0.252963	0.479654	1.27245	0.957361	1.02354	0	0.444557	0.163128	1.83021
ALDH2		NM_001204889	0.351114	112204690	112247789		NP_001191818.1	470		chr12		0	4.73113	0	0	1.21257	0	1.99666	0	0.0731762	1.2619	1.92195	4.21093	0.5653	3.02165	1.07577	3.34288	13.9957	10.3828	1.14456	0	0	0.285215	0	0	0	5.39924	0	0	0	0.696861	3.96097	0.423276	0	0.13018	1.57746	0.55409	1.10398	0.962271
ALDH2		NM_000690	0.648886	112204690	112247789		NP_000681.2	517		chr12		0.0826717	0.681114	0	2.6237	0.4578	1.38361	2.38228	3.14913	0	2.65288	2.51242	9.89086	35.9005	3.75793	5.46164	3.43518	7.3626	0.284086	0.787489	0.0566742	1.31277	0.160485	0.208347	0	0	7.94472	0.0590929	0.0388784	0	0.136626	29.9874	2.06539	0	0	4.69502	1.42164	11.2259	11.9492
ALDH3A1		NM_001135168	0.570458	19641297	19648772		NP_001128640.1	453		chr17		0	0.0392176	0.228694	0.527014	0.040371	0.0726312	0.447987	0.0436797	0.583149	0.957147	0.202532	0.399745	3.71303	0.270683	0.337334	1.1836	2.41648	0.415024	0	0.10378	0	0.139549	0.271692	0	0.067169	0	0.0481399	0.0536512	0	0.149894	0.0736897	0.0556057	0	0.748251	2.45786	0.552589	0.465277	0.127772
ALDH3A1		NM_001135167	0.243237	19641297	19648925		NP_001128639.1	453		chr17		0	0	0	0	0	0	1.89553	0	0.0811153	0.375031	0	42.528	65.0704	0.0536866	3.53932	1.57968	1.45629	0	0	0	0	0	0	0	0	0.0443164	0.0347789	0	0	0.0964181	0	0	0	0.903718	42.8781	3.42596	0.761204	0
ALDH3A1		NM_000691	0.186305	19641297	19651746		NP_000682.3	453		chr17		0	0	0	0	0	0	0	0	0.392183	0.335544	0	37.6713	46.4379	0	8.21561	3.25769	5.53474	0	0	0	0	0.0459978	0	0	0	0	0.040469	0	0	0.0504385	0	0	0	0	46.8928	3.87882	0	0
ALDH3A2		NM_001031806	0.158364	19552063	19580904		NP_001026976.1	508		chr17		1.03112	0.887052	0.241935	0.310956	1.12071	0.205898	2.60651	0.775161	1.40358	3.88952	0.317431	2.16522	0.43514	2.59812	0.901907	0.977276	1.59626	1.17335	0	1.35545	0	0.1598	0	0.344816	0.184466	0.0959619	0.0363328	0.300508	0.180068	0	0.501894	0.978925	0.685115	0.802315	1.33285	0.314037	0.620962	0
ALDH3A2		NM_000382	0.841636	19552063	19580908		NP_000373.1	485		chr17		5.82168	4.48422	1.02356	4.74518	5.88522	0.668771	9.13444	2.05436	17.4767	22.0511	6.72071	9.29776	13.8277	10.5774	6.23093	5.15543	7.68163	7.0119	0.0419917	1.63089	0.0469585	0.121662	1.54891	0.808159	2.63085	3.31974	3.04554	10.6388	2.39642	2.74006	2.1595	4.03354	5.1482	1.93672	13.0111	7.00485	5.01103	3.07093
ALDH3B1		NM_001161473	0.0325404	67776016	67796749		NP_001154945.1	468		chr11		0.177357	0	0	0	0.119493	0	0	0	0.101403	0.0632412	0	0	0.738209	0	1.03623	0.309505	0	0	0	0	0	0	0	0	0	0	0.0976672	0.13721	0	0.11214	0	0	0	0	0	0.245199	0	0
ALDH3B1		NM_001290059	0.115329	67777774	67796749		NP_001276988.1	272		chr11		0.542326	0	0.90855	0.185236	0	0	0.280043	0.239759	0	1.15228	0.355347	0	0.484039	0	1.12958	2.31536	0.210736	0	0	0	0	0.19851	0	0.449446	0	0	0	0.113414	0.251991	0	0	0.0919851	0	0.49939	0	2.34586	0.521289	1.13179
ALDH3B1		NM_001290058	0.197193	67777774	67796749		NP_001276987.1	351		chr11		0	0.979933	0.212448	0.634847	2.22214	0.23052	2.96168	0	0.48956	0.296238	0.0826654	0	0	1.60925	0.148146	1.00804	0	0.218035	0.0590637	1.85223	0	0	5.24699	0	0	0.0518524	0.205476	0	0	1.56362	0.179796	0	0	0	5.89858	0.700143	0	0.27932
ALDH3B1		NM_001030010	0.285304	67777774	67796749		NP_001025181.1	431		chr11		0	0.0566071	0	1.89887	3.13569	0	4.1455	1.09336	1.79568	1.18022	1.26856	0.371537	0.196779	1.99518	1.20685	4.84474	0.91697	0	0.0463362	2.10023	0	0.102455	1.50855	1.1025	0.370553	0.372312	0.0580645	0.0605473	0.135909	0.0700176	0.53502	0.502911	0	1.00039	8.89043	9.82596	0.35656	1.20159
ALDH3B1		NM_000694	0.369634	67777774	67796749		NP_000685.1	468		chr11		0	0	0	0	0.0905428	0.160447	0	1.87327	0	1.56723	2.39516	0.16022	2.63473	0.450319	1.03841	0	0	0	0	0	0	0	0	2.34122	0.980855	1.30372	0	0.439685	0.200048	0.0786189	0.0864335	0.552063	1.11278	0	4.57626	37.4522	3.04679	10.4175
ALDH3B2		NM_000695	0.566176	67429632	67442102		NP_000686.2	385		chr11		2.23321	0	0.057355	0.08094	2.26506	0	0.0348063	0	0.0996183	0.0469788	0.0619398	0	0	0.0184139	0.0815215	0.261029	0.0455246	0	0.107386	0.0801749	0	0.163232	0.48362	0	0	0	0.0734114	0.125411	0.0519493	0.214825	0.0289844	0	0	0.240214	0.172269	0	0	0.120269
ALDH3B2		NM_001031615	0.433824	67429632	67448685		NP_001026786.1	385		chr11		6.88276	0.0230009	0.117689	0	12.7832	0	0.0369843	0.0613081	0	0.0502289	0	0.623362	0.0909137	0.0424588	0	0.188984	0	0	0	0	0	1.26729	0	0	0.0362805	0.0564091	0.0430048	0.526496	0	0	0	0	0	0	0	0.292638	0	0
ALDH4A1		NM_001161504	0.709347	19197923	19217385		NP_001154976.1	503		chr1		6.04105	0	1.56818	2.10482	7.43981	0	1.93122	0.776248	1.31387	2.63817	2.35249	8.68842	3.23462	1.51333	3.9361	3.48617	2.29869	0	5.68447	0.447686	2.33665	0.588612	1.26645	0.650227	0.388104	8.04333	4.08768	2.43626	2.38764	1.42498	4.9221	3.07249	2.52933	0.395103	0.807701	3.30735	3.46975	0.822969
ALDH4A1		NM_003748	0.215622	19197923	19229293		NP_003739.2	563		chr1		0.89062	0	0.630109	0	0.652269	1.10996	0.177081	1.11989	0	0.920216	0.634861	1.2387	0.255936	0.336033	0.415067	1.09795	0.541016	0	0.368596	0	0.906892	0.258172	0.49472	0.509233	0.1344	1.20448	0.966854	0.463041	0.690033	0.303447	1.59942	0.884265	0.325396	0.673172	0.332661	0.459978	0.0381862	0.704892
ALDH4A1		NM_170726	0.0750312	19197923	19229293		NP_733844.1	563		chr1		0	0.0562567	0	0	0	0	0.0601209	0	0	0	0.0299603	0.0857576	0	0.0228692	0.104834	0	0	0.137039	0.0903066	0.272682	0	0.328518	0	0	0	0	0	0	0	0	0	0	0	0	0	0.0615106	0.0454417	0
ALDH5A1		NM_001080	0.879785	24495196	24537435		NP_001071.1	535		chr6		2.15664	0.0960154	0.453249	0.0604128	1.87762	0.353556	0.145772	0.344755	1.88282	0.19873	0.56931	1.01414	0.682315	0.901715	2.11213	0.445573	0	1.82815	5.1804	2.23339	1.10484	2.54203	0.515296	0.454873	0	1.50787	0	0.224773	0	0.77837	0.277045	0.49197	0	0.138317	0.607379	1.61491	1.31886	0.32551
ALDH5A1		NM_170740	0.120215	24495196	24537435		NP_733936.1	548		chr6		0	0	0	0	0.418349	0	0	0	0	0.0322579	0.291086	0	0.139825	0.063947	0.781774	0.16838	0.552138	0	1.13203	0	0	0.248489	0	0	0	0.746486	0.0652621	0	0.159067	0.0103048	0.043864	0	0	0	0.168045	0.165566	0.298031	0.0401881
ALDH6A1		NM_005589	0.580787	74524367	74551196		NP_005580.1	535		chr14		2.19656	0	0	0	4.90906	0.545961	0.573986	0.780148	0.816077	1.97761	0.97967	0	1.90218	1.25124	0.916343	0	0.896552	0	2.49078	0	0.235334	0	0	0.521063	0.180898	2.11679	0.0313656	0.910873	0.227513	0.0955755	0.385239	1.04864	0.334555	0	0.34717	0.822403	0.926384	1.37885
ALDH6A1		NM_001278593	0.264676	74524367	74551196		NP_001265522.1	522		chr14		0	1.131	0	0.202806	3.76075	0	0.619064	0.263833	1.18623	0	0	0.309508	0	0.0366815	0.166263	0.339728	0.426686	1.72324	0	0.502917	0.288745	0.522647	1.079	0	0	0	0.0614402	0	0	0.0726712	0.143519	0	0	0.309027	0	0	0	0
ALDH6A1		NM_001278594	0.154537	74524367	74551196		NP_001265523.1	381		chr14		2.07919	0	0.547569	0.366517	0.752982	0	0	0	0.711766	0.449094	0.145473	0.155023	0.359469	0.15232	0.70277	0.129805	0.372636	0	0.174698	0.120881	0.0587778	0.104235	0.160324	0	0.0462102	0.162187	0.00871239	0.221125	0.0624265	0.0375727	0	0.123873	0	0.819616	0.196196	0.0663509	0.238667	0.0992262
ALDH7A1		NM_001202404	0.0495805	125877532	125931082		NP_001189333.2	475		chr5		0	0	0	0	0	0	0	0.0170339	0	0	0	0	0	0.019024	0	0	0	8.44958	0	0	0	0	0.109117	0.0232453	0	0	0	0	0	0	0	0	0	0	0	0	0	0
ALDH7A1		NM_001201377	0.950419	125877532	125931082		NP_001188306.1	511		chr5		4.66256	7.94258	1.75019	3.03091	6.14462	2.06094	3.63704	4.36592	3.08192	4.26353	4.88389	1.57536	1.53087	5.14635	2.17137	2.21898	2.47476	3.45231	0.791007	0.0375166	0	0.419047	0	0	1.49749	2.24074	2.33279	2.57843	2.48193	1.60903	1.26217	5.32751	5.75314	2.15422	1.23605	4.00987	5.19445	2.70854
ALDH8A1		NM_001193480	0.186374	135238527	135271260		NP_001180409.1	437		chr6		0	0	0	0.0732652	0	0	0	0	0.0888661	0	0	0	0.046203	0.245959	0	0	0.0842826	0.232379	0	0	0	0	0.107187	0	0	0	0	0	0	0.0210683	0	0	0	0.122592	0	0	0	0
ALDH8A1		NM_170771	0.787279	135238527	135271260		NP_739577.1	433		chr6		0	0.0393636	0.0653219	0	0.0357434	0.0656431	0.0249876	0.0463365	0.0973097	0.0747454	0.250301	0.336381	0	0.128119	0.199371	0.0365888	0	0	0.351473	0.0300104	0	0.104655	0	0.0768936	0.041319	0	0.0558847	0.021395	0.031956	0	0	0.0725557	0	0	0.0382417	0.194605	0.143787	0.0742498
ALDH8A1		NM_022568	0.0263479	135238527	135271260		NP_072090.1	487		chr6		0	0	0	0	0	0	0	0	0	0	0.0290017	0	0	0	0	0	0	0	0	0	0	0	0	0	0	0	0	0	0	0	0	0	0	0	0	0.0614224	0	0
ALDH9A1		NM_000696	1	165631448	165667900		NP_000687.3	518		chr1		10.2159	53.7897	7.0428	5.80243	26.3783	4.47181	12.158	10.4328	11.3509	12.3696	12.791	8.49355	11.445	19.8448	10.9516	8.74672	18.8296	38.3618	26.9865	11.3195	5.45008	7.96998	5.50414	4.49203	7.39467	15.3495	9.10665	8.08005	5.91338	10.6588	31.5424	17.2909	10.511	4.95321	5.06325	11.1502	9.8322	8.4769
ALDOA		NM_000034	0.00436807	30064410	30081741		NP_000025.1	364		chr16		1.2291	0.111121	0.395694	1.17861	1.58967	0.917981	1.54358	2.62561	0.243155	2.03183	2.78858	0.831152	2.32187	1.28756	1.37007	1.25537	2.68298	0.07207	5.14433	0.929867	3.01182	0.510846	0.457801	2.4175	1.39562	0.869687	0.946731	1.87171	1.0767	0.694008	1.76723	0.945994	2.58577	0.374256	1.36991	2.42695	0.990317	1.28739
ALDOA		NM_184043	0.249743	30075599	30081741		NP_908932.1	364		chr16		182.484	23.4719	94.7931	75.3233	100.875	0.653664	563.505	125.746	21.0391	88.2884	122	18.9442	97.0978	282.412	23.1868	26.6814	176.648	5.67995	444.482	156.301	13.169	83.0884	160.673	105.571	36.8636	23.2601	63.0595	23.6111	53.5386	4.97378	32.0341	51.4732	84.0674	33.0097	28.6947	20.9733	10.4026	76.7389
ALDOA		NM_001127617	0.00357681	30075817	30081741		NP_001121089.1	364		chr16		2.32577	0	1.06394	0.998222	2.1688	0.530954	2.31393	1.42293	0.907674	1.43833	0.907111	0.398355	2.03153	1.17772	1.00439	0.696394	1.23777	0	1.51424	0.763407	0.653713	1.47802	1.06346	1.34533	0.719767	0.415373	0.41274	0.342682	0.818643	0.279881	0.986608	1.34378	1.68503	1.75568	1.44075	0.564874	0.447122	0.893112
ALDOA		NM_184041	0.737324	30076993	30081741		NP_908930.1	364		chr16		301.849	2.9666	204.897	193.453	217.214	168.318	374.537	376.092	323.891	418.099	524.887	285.096	291.274	129.552	294.807	333.649	523.151	0.649906	136.865	51.0144	310.517	51.0405	17.1143	161.408	272.87	198.945	607.541	313.822	455.801	509.384	477.729	613.968	563.82	110.649	220.928	465.872	315.121	235.909
ALDOA		NM_001243177	0.00498817	30076993	30081741		NP_001230106.1	418		chr16		1.47364	0	0.375012	0.874978	1.88034	0.0934714	0.921851	1.26933	0.272735	1.07418	6.83536	0.830996	3.05473	1.23006	3.523	2.02583	2.30505	0	0.765171	0.141449	0.985096	0.149409	0.402032	2.19165	3.53837	1.70254	4.45825	5.86224	1.69216	6.83456	1.83114	2.99681	2.57404	0.418035	0.969747	0.576398	1.53534	0.800493
ALDOB		NM_000035	1	104182841	104198062		NP_000026.2	364		chr9		0	0	0	0	0	0	0	0.0327068	0	0.0348503	0.0470009	0.080975	0	0.012958	0	0	0	0.059141	0.0556547	0	0	0.049351	0.212431	0.0750959	0	0.0428518	0.0734491	0	0	0.0554174	0	0	0	0.116628	0	0	0	0
ALDOC		NM_005165	1	26900132	26903951		NP_005156.1	364		chr17		7.2051	0.194329	0.247804	5.79344	18.2318	0.311448	3.5764	3.29168	0.242902	1.38659	1.31025	9.73255	14.4918	8.03984	1.04844	3.775	79.437	0.278189	1.60556	1.47682	8.187	8.35883	5.38493	11.1426	5.89303	7.33171	5.14362	0.224478	0.21865	10.5995	24.4343	23.1493	0.189614	0.165951	0.651278	3.69016	0.79743	7.85091
ALG1		NM_019109	1	5121809	5137380		NP_061982.3	464		chr16		1.53346	0.83005	0.714084	1.04305	2.10378	0.554689	3.18362	1.94677	0.78548	2.05901	2.35218	2.28067	2.38259	1.74337	2.24203	2.17593	2.08822	1.67692	4.79971	1.35725	1.09895	0.768978	1.07003	3.16776	1.95658	3.31435	2.10346	2.68772	1.9912	1.47207	3.30549	3.62682	3.28435	0.847954	0.8842	2.9556	1.81484	1.46445
ALG10		NM_032834	1	34175215	34181236		NP_116223.3	473		chr12		1.33694	0.782298	0.229053	0.151481	1.57874	0.694208	0.83207	0.688119	0.229511	0.547142	0.775167	0.379486	0.987185	1.04822	1.00059	0.93717	0.847551	1.05296	1.81315	0.908059	1.05979	0.915782	0.474044	0.533573	0.904323	0.695142	0.369838	0.628223	0.832253	0.129678	0.687662	0.699182	0.532183	0.376711	0.612258	0.974119	1.33243	0.711505
ALG10B		NM_001013620	0.77457	38710556	38723528		NP_001013642.1	473		chr12		0.298545	0.191028	0.081414	0.0883838	0.78151	0.180703	0.357938	0.339798	0.135091	0.219536	0.25607	0.0927522	0.3143	0.38932	0.279791	0.376385	0.0300208	0.157218	0.60212	0.259502	0.0683312	0.337258	0.227555	0.119834	0.329077	0.434118	0.174868	0.269129	0.270146	0.13836	0.238265	0.319321	0.219375	0.227965	0.126654	0.475373	0.27754	0.189555
ALG10B		NM_001308340	0.22543	38710556	38723528		NP_001295269.1	126		chr12		0.120923	0.0291682	0.0728474	0.0913872	0.196618	0	0.0598443	0.100653	0.106074	0.0498315	0.0502012	0	0	0.22512	0	0.172494	0	0.660079	1.1769	0.251327	0.0696477	0.230221	0	0.0428597	0.0891918	0	0.0959382	0.0204759	0	0	0.307587	0.169175	0.0460865	0	0.140542	0.107295	0.0782019	0
ALG11		NR_036571	0.0327482	52586522	52603780		na	na		chr13		0	0.17906	0	0	0	0.36407	0	0	0	0	0	0	0	0	0	0	0	0	0	0	0	0.0592529	0	0	0.113872	0	0	0	0	0	0	0	0	0	0	0	0	0
ALG11		NM_001004127	0.967252	52586522	52603780		NP_001004127.2	492		chr13		0.395744	1.82227	0.401885	0.351644	1.03897	0.180987	0.739499	0.89968	0.412345	0.991888	0.878237	0.892668	1.34158	1.39113	0.939932	0.717713	0.687878	0.281295	0.782271	0.0679497	0.929579	0.289579	0.336413	0.365529	1.17444	1.04715	0.232088	0.51618	0.693549	0.725622	1.39289	0.770422	0.583325	0.345828	0.336252	0.932223	0.71829	0.460135
[truncated: 45,535 more rows]
[truncated: 22 more columns]
